# Supplementary material for: A Wnt-Induced Phenotypic Switch in Cancer-Associated Fibroblasts Inhibits EMT in Colorectal Cancer
Source: Oxford University Press journal article supplement (doi:10.1158/0008-5472.can-20-0263), 2020-10-14
Supplement: 00085472can200263-sup-236195_2_supp_6585434_qh0gyh.xlsx [file 00085472can200263-sup-236195_2_supp_6585434_qh0gyh.xlsx]

## Sheet: Table S1
	Table S1A	List of antibodies used for IHC and IF staining
	antibody	manufacturer	cat no.	concentration	antigen retrieval
	Rabbit anti-Ki67	Cell signaling	9129	1:10000	Tris EDTA/pH 9 for 10 min
	Rabbit anti-β-catenin	Merck Millipore	06-734	1:200	Citrate/pH 6 for 10 min
	Rabbit anti-cleaved caspase-3 (Asp175)	Cell signaling	9661S	1:200	Tris EDTA/pH 9 for 20 min
	Mouse Anti-E-cadherin ( Clone: 36/E-Cadherin)	BD Biosciences	610181	1:200	Tris EDTA/pH 9 for 20 min
	Rabbit Anti-Vimentin	Abcam	ab24525l	1:1000	Citrate/pH 6 for 20 min
	Mouse Anti-αSMA (clone: 1A4)	eBioscience	14-9760-80	1:200	Citrate/pH 6 for 20 min
	Rabbit Anti-Zeb1	Sigma Aldrich	HPA027524L	1:200	Tris EDTA/pH 9 for 20 min
	Rat anti-HA (clone 3F10)	Roche	11867423001	0.2 μg ml−1	Citrate/pH 6 for 20 min
	Anti mouse Ki-67 eflour 660 (clone: SolA15)	eBioscience	50-5698-80	1:500	N/A
	Anti-rabbit Alexa fluor® 647	Thermo Fisher	A-31573	1:500	N/A
	Anti-mouse Alexa fluor® 488	Thermo Fisher	A-21202	1:500	N/A
	Rabbit anti-rat IgG(H+L)	SouthernBiotech	6180-01	1:400	N/A
	Table S1B	List of qRT-PCR primers used
	gene symbol	forward primer		reverse primer
	Axin2	GGACTGGGGAGCCTAAAGGT		AAGGAGGGACTCCATCTACGC
	Lgr5	CTGAGACAGGTTCCGGAGGA		GAGATGCAGAACCACGAGGC
	Vim	TGCCAACTACATCGACAAGG	CTCCTGCAATTTCTCTCGCA	CTCCTGCAATTTCTCTCGCA
	Zeb1	CGAGCATTTAGACACAAGCGAG	CGGAATCTGAATTTGCTTCTACCA	CGGAATCTGAATTTGCTTCTACCA
	Cdh1	AGACTTTGGTGTGGGTCAGG	CATGCTCAGCGTCTTCTCTG	CATGCTCAGCGTCTTCTCTG
	Acta2	AGGGCTGTTTTCCCATCCAT	GGCCCATTCCAACCATTACTC	GGCCCATTCCAACCATTACTC
	Il6	ATGGTACTCCAGAAGACCAGAGGA	GTATGAACAACGATGATGCACTTG	GTATGAACAACGATGATGCACTTG
	Il1a	TGATGAAGCTCGTCAGGCAG	GCAACTCCTTCAGCAACACG	GCAACTCCTTCAGCAACACG
	Tnfa	CGTGGAACTGGCAGAAGAGG	TGGTGGTTTGCTACGACGTG	TGGTGGTTTGCTACGACGTG
	Cdkn1a	ATTCAGAGCCACAGGCACCAT		TCTCCGTGACGAAGTCAAAGTT
	Pmaip1	CTCCCAGGAAGGAAGTTCCG		CGAGCGTTTCTCTCATCACATC
	Mdm2	AATCCTCCCCTTCCATCACACT		GATTTCCACTTTATCTTTCCCCTTATC
	Bax	AAACTGGTGCTCAAGGCCCT		AGCAGCCGCTCACGGAG
	Bbc3	ACGACCTCAACGCGCAGT		GTGAGGGTCGGTGTCGATG
	Prox1	CTTCCGCCATCCCTTTCC		AGGCTCTGTCCTTCCCCG
	Myc	CCAGCAGCGACTCTGAAGAA		ACTGTCCAACTTGGCCCTCT
	Ccnd1	GAGGAGCTGCTGCAAATGGA		GTTGTGCGGTAGCAGGAGAG
	Tnfrsf19	ATTCTCTTCCTACTCCACCTG		CATAGCCGAAGCCACATTC
	Hprt	AAGCTTGCTGGTGAAAAGGA	TTGCGCTCATCTTAGGCTTT	TTGCGCTCATCTTAGGCTTT

## Sheet: Table S2
Table S2	Differential gene expression analysis (RNA sequencing) of control and Sfrp1-expressing mouse tumor organoids cultured in vitro.
Ensembl gene ID	gene name	mean normalized counts	fold change (log2)	p-value	adj. p-value
ENSMUSG00000031548.7	Sfrp1	521.962	6.05439	3.89e-173	6.42e-169
ENSMUSG00000036641.8	Ccdc148	204.136	2.27828	7.2e-18	1.08e-14
ENSMUSG00000018865.8	Sult4a1	95.3375	2.24473	1.41e-19	2.33e-16
ENSMUSG00000026976.15	Pax8	303.719	1.97872	1.44e-13	8.49e-11
ENSMUSG00000011034.6	Slc5a1	402.175	1.9053	1.16e-14	7.96e-12
ENSMUSG00000030519.14	Apba2	115.893	1.79412	3.5e-11	1.15e-08
ENSMUSG00000060206.11	Zfp462	251.411	1.77738	6.48e-11	1.96e-08
ENSMUSG00000025888.5	Casp1	134.935	1.70352	3.24e-11	1.09e-08
ENSMUSG00000021708.16	Rasgrf2	269.633	1.70288	1.76e-10	4.93e-08
ENSMUSG00000032028.15	Nxpe2	68.4465	1.69713	7.12e-10	1.73e-07
ENSMUSG00000075520.5	Malrd1	83.6002	1.64282	4.77e-09	9.39e-07
ENSMUSG00000032661.9	Oas3	317.885	1.57913	2.24e-12	9.93e-10
ENSMUSG00000026614.6	Slc30a10	64.0191	1.57739	1.91e-08	3.06e-06
ENSMUSG00000061527.6	Krt5	187.775	1.54754	3.32e-08	4.8e-06
ENSMUSG00000024619.8	Cdx1	277.826	1.51504	3.66e-08	5.19e-06
ENSMUSG00000001739.14	Cldn15	94.8138	1.49874	3.21e-08	4.69e-06
ENSMUSG00000008193.13	Spib	174.464	1.47706	3.75e-08	5.21e-06
ENSMUSG00000032226.5	Gcnt3	336.688	1.47334	2.24e-09	4.61e-07
ENSMUSG00000038700.4	Hoxb5	212.568	1.47243	9.5e-14	5.8e-11
ENSMUSG00000027199.14	Gatm	53.6944	1.47061	1.46e-07	1.55e-05
ENSMUSG00000028327.14	Stra6l	550.441	1.46534	1.13e-11	4.12e-09
ENSMUSG00000021806.3	Nid2	173.171	1.44946	6.38e-08	7.8e-06
ENSMUSG00000035493.9	Tgfbi	107.604	1.44803	2.51e-07	2.43e-05
ENSMUSG00000027801.7	Tm4sf4	252.197	1.40581	5.96e-08	7.56e-06
ENSMUSG00000031877.8	Ces2g	125.959	1.3979	5.25e-13	2.79e-10
ENSMUSG00000056270.3	Prr9	89.278	1.39629	NA	NA
ENSMUSG00000067219.9	Nipal1	291.697	1.39339	3.95e-20	7.25e-17
ENSMUSG00000026222.16	Sp100	73.8769	1.37803	9.54e-08	1.08e-05
ENSMUSG00000038843.17	Gcnt1	303.469	1.373	1.05e-08	1.88e-06
ENSMUSG00000035429.13	Ptprh	101.244	1.37273	2.25e-07	2.25e-05
ENSMUSG00000025165.12	Sectm1a	54.0094	1.36567	1.04e-06	8.4e-05
ENSMUSG00000026077.15	Npas2	519.181	1.36418	9.54e-09	1.77e-06
ENSMUSG00000071604.4	Fam189a2	156.488	1.358	1.71e-07	1.77e-05
ENSMUSG00000036856.4	Wnt4	104.007	1.35525	1.13e-07	1.25e-05
ENSMUSG00000027876.4	Reg4	81.152	1.35425	1.39e-06	0.000106954
ENSMUSG00000030838.17	Ush1c	644.144	1.34235	6.49e-13	3.34e-10
ENSMUSG00000050866.7	Clrn3	167.671	1.32902	1.28e-06	9.91e-05
ENSMUSG00000000690.5	Hoxb6	494.099	1.32614	3.34e-12	1.38e-09
ENSMUSG00000044860.9	Gm1123	446.744	1.32439	3.63e-08	5.19e-06
ENSMUSG00000021591.7	Glrx	291.314	1.32337	1.62e-08	2.75e-06
ENSMUSG00000031621.9	Isx	579.262	1.31955	6.56e-07	5.55e-05
ENSMUSG00000048905.4	4930539E08Rik	528.788	1.31618	5.68e-07	4.98e-05
ENSMUSG00000028713.17	Cyp4b1	93.0202	1.30632	2.08e-06	0.000144247
ENSMUSG00000015619.10	Gata3	258.023	1.30293	2.92e-08	4.42e-06
ENSMUSG00000040136.9	Abcc8	75.6507	1.29827	1.91e-06	0.000134396
ENSMUSG00000029154.13	Cwh43	403.567	1.29773	1.59e-06	0.00011635
ENSMUSG00000045679.13	Pqlc3	109.473	1.28974	7.78e-09	1.49e-06
ENSMUSG00000029811.14	Aoc1	215.793	1.28751	2.34e-06	0.000157263
ENSMUSG00000021509.5	Slc25a48	282.941	1.28562	4.07e-08	5.6e-06
ENSMUSG00000027340.15	Slc23a2	1681.16	1.28006	7.23e-16	6.28e-13
ENSMUSG00000028268.14	Gbp3	92.635	1.27584	1.26e-07	1.36e-05
ENSMUSG00000042638.14	Gucy2c	766.38	1.26976	1.23e-20	2.53e-17
ENSMUSG00000034918.8	Cdhr2	574.159	1.26693	1.1e-06	8.73e-05
ENSMUSG00000072115.10	Ang	68.1351	1.26547	1.05e-06	8.44e-05
ENSMUSG00000031712.8	Il15	70.2066	1.25932	1.01e-07	1.13e-05
ENSMUSG00000022824.12	Muc13	550.099	1.25654	2.19e-06	0.000150371
ENSMUSG00000031391.18	L1cam	341.248	1.25289	1.37e-16	1.41e-13
ENSMUSG00000039899.5	Fgl2	214.165	1.25036	1.29e-09	2.87e-07
ENSMUSG00000040118.15	Cacna2d1	87.6911	1.23821	1.02e-05	0.000538653
ENSMUSG00000032528.4	Vipr1	419.972	1.21262	4.76e-08	6.43e-06
ENSMUSG00000055730.15	Ces2a	398.729	1.20606	5.18e-07	4.57e-05
ENSMUSG00000029646.3	Cdx2	785.284	1.19984	1.22e-08	2.14e-06
ENSMUSG00000022938.7	Fam3b	58.9867	1.19064	8.18e-06	0.000454109
ENSMUSG00000040471.17	Ggt6	81.7322	1.1777	2.3e-05	0.00104656
ENSMUSG00000042686.5	Jph1	103.476	1.17703	3.07e-07	2.91e-05
ENSMUSG00000031722.9	Hp	181.289	1.16888	1.49e-05	0.000751618
ENSMUSG00000058354.6	Krt6a	124.991	1.16081	2.58e-05	0.00114904
ENSMUSG00000079445.3	B3gnt7	93.2065	1.15511	1.57e-05	0.000780967
ENSMUSG00000078952.9	NA	132.74	1.15386	7.09e-06	0.000406065
ENSMUSG00000105476.1	NA	84.094	1.15166	3.69e-05	0.00153601
ENSMUSG00000024727.8	Trpm6	840.82	1.15121	7.78e-08	9.17e-06
ENSMUSG00000039137.18	Whrn	379.851	1.14151	2.01e-10	5.53e-08
ENSMUSG00000042429.8	Adora1	220.616	1.13686	2.05e-06	0.000142946
ENSMUSG00000068794.6	Col28a1	65.8617	1.12277	7.34e-06	0.000418784
ENSMUSG00000031137.17	Fgf13	81.3463	1.12027	6.31e-05	0.00237632
ENSMUSG00000023341.14	Mx2	65.778	1.11939	3.36e-06	0.000218033
ENSMUSG00000033187.7	BC016579	110.911	1.11531	2.27e-05	0.001039
ENSMUSG00000029802.13	Abcg2	103.31	1.10923	5.71e-05	0.00218827
ENSMUSG00000102163.1	NA	125.365	1.1031	7.53e-06	0.000424338
ENSMUSG00000072620.3	Slfn2	220.595	1.09854	5.51e-08	7.15e-06
ENSMUSG00000021336.16	Slc17a4	122.807	1.08996	0.000102842	0.00346907
ENSMUSG00000032246.13	Calml4	504.109	1.08778	1.45e-12	6.82e-10
ENSMUSG00000033355.5	Rtp4	331.676	1.07636	7.82e-11	2.26e-08
ENSMUSG00000032690.16	Oas2	96.443	1.07532	0.000112625	0.00371549
ENSMUSG00000013418.8	B4galnt2	680.51	1.07267	7.85e-10	1.85e-07
ENSMUSG00000021208.9	Ifi27l2b	118.223	1.0721	0.000128526	0.00410462
ENSMUSG00000085683.1	9130409J20Rik	51.9805	1.07134	0.000135573	0.00427344
ENSMUSG00000067006.12	Serpinb5	428.727	1.06981	1.59e-05	0.000787238
ENSMUSG00000074653.10	Lrrc31	87.9053	1.06649	9e-06	0.00048689
ENSMUSG00000024388.10	Myo7b	2431.08	1.0628	3.48e-07	3.19e-05
ENSMUSG00000015970.18	Chdh	599.493	1.05933	3.29e-07	3.07e-05
ENSMUSG00000021456.7	Fbp2	194.786	1.05698	0.0001671	0.00498428
ENSMUSG00000001588.12	Acap1	811.737	1.05582	3.27e-09	6.58e-07
ENSMUSG00000029330.8	Cds1	62.883	1.04899	0.000185131	0.00542405
ENSMUSG00000046456.14	Tmem150b	112.732	1.04737	1.13e-05	0.000585455
ENSMUSG00000005107.13	Slc2a9	53.4801	1.04481	0.000187216	0.00547234
ENSMUSG00000078942.10	Naip6	351.104	1.03902	3.51e-10	9.2e-08
ENSMUSG00000028415.4	Spink4	89.5318	1.03445	0.000143015	0.00442594
ENSMUSG00000026959.13	Grin1	91.8244	1.02671	0.000111203	0.00368053
ENSMUSG00000039364.13	Sectm1b	367.317	1.01923	0.000113297	0.0037302
ENSMUSG00000045333.15	Zfp423	132.297	1.01908	1.4e-05	0.000711791
ENSMUSG00000044734.15	Serpinb1a	342.405	1.01643	0.000130513	0.004148
ENSMUSG00000056648.5	Hoxb8	468.826	1.01404	9.21e-05	0.0032114
ENSMUSG00000028028.11	Alpk1	366.063	1.01191	3.69e-06	0.000234775
ENSMUSG00000034107.10	Ano7	62.8695	1.0076	4.89e-05	0.00193448
ENSMUSG00000075420.6	Smim6	82.9838	1.00386	3.52e-05	0.00148586
ENSMUSG00000039304.11	Tnfsf10	206.036	1.00273	4.68e-05	0.00186403
ENSMUSG00000029561.17	Oasl2	366.256	0.997881	4.97e-05	0.00195315
ENSMUSG00000021684.16	Pde8b	135.851	0.995325	0.000102741	0.00346907
ENSMUSG00000043088.16	Il17re	94.0037	0.994268	0.000334157	0.00854562
ENSMUSG00000012123.15	Aim1l	588.505	0.993554	2.85e-06	0.000187208
ENSMUSG00000033538.13	Casp4	205.721	0.99304	0.000336866	0.00859838
ENSMUSG00000023045.12	Soat2	122.811	0.992494	0.000111342	0.00368053
ENSMUSG00000019768.16	Esr1	384.611	0.991081	4.12e-06	0.000255247
ENSMUSG00000024029.4	Tff3	67.8926	0.986486	0.000370583	0.00926177
ENSMUSG00000006143.12	Upk3bl	56.5217	0.976725	0.000152424	0.00465598
ENSMUSG00000031647.10	Mfap3l	87.2044	0.965085	8.82e-05	0.00310663
ENSMUSG00000030954.9	Gp2	261.229	0.962496	1.6e-06	0.000116819
ENSMUSG00000028544.14	Slc5a9	242.49	0.956222	0.00063993	0.0142068
ENSMUSG00000040253.15	Gbp7	342.44	0.952003	9.33e-06	0.000501168
ENSMUSG00000074625.10	Arhgap40	83.7657	0.948255	0.000563305	0.0128873
ENSMUSG00000037033.9	Clca3b	1032.9	0.925096	0.000243599	0.00665582
ENSMUSG00000028037.13	Ifi44	417.33	0.924848	6.6e-05	0.00245723
ENSMUSG00000026589.14	Sec16b	293.517	0.924824	0.000700839	0.015191
ENSMUSG00000021998.16	Lcp1	376.817	0.924093	3.34e-07	3.1e-05
ENSMUSG00000074813.12	NA	119.274	0.92109	0.00015348	0.00467959
ENSMUSG00000020875.9	Hoxb9	386.23	0.918688	0.00083282	0.0172797
ENSMUSG00000059588.13	Calcrl	61.2315	0.908264	0.000762867	0.0163161
ENSMUSG00000031340.8	Gabre	77.0477	0.908123	0.000117825	0.00381831
ENSMUSG00000004952.13	Rasa4	398.784	0.90438	0.000207534	0.00593654
ENSMUSG00000012519.14	Mlkl	211.243	0.898753	2.76e-05	0.00121263
ENSMUSG00000034427.16	Myo15b	443.903	0.89848	0.00117722	0.022553
ENSMUSG00000027173.7	Depdc7	147.445	0.898024	0.0010999	0.0212445
ENSMUSG00000021367.7	Edn1	309.257	0.897038	0.00113981	0.0219383
ENSMUSG00000028262.13	Clca3a2	97.8585	0.893707	0.00142457	0.0261674
ENSMUSG00000020053.18	Igf1	61.6733	0.88675	0.000692849	0.0151126
ENSMUSG00000091183.5	Gm5141	81.5096	0.879969	0.000309092	0.00804176
ENSMUSG00000074805.5	NA	281.416	0.879145	0.00126006	0.0237539
ENSMUSG00000027463.14	Slc52a3	192.816	0.874135	0.000997844	0.0196861
ENSMUSG00000021950.15	Anxa8	534.913	0.872544	0.000902264	0.0183149
ENSMUSG00000037157.8	Il22ra1	114.214	0.871933	0.00029197	0.00770568
ENSMUSG00000021876.14	Rnase4	399.052	0.871672	0.000460572	0.0109469
ENSMUSG00000026726.10	Cubn	569.827	0.870827	0.000427874	0.0103487
ENSMUSG00000041577.5	Prelp	900.267	0.870783	1.95e-06	0.000137126
ENSMUSG00000024140.9	Epas1	723.564	0.869277	0.000918661	0.0185259
ENSMUSG00000026832.12	Cytip	64.5334	0.866689	0.00191485	0.0323953
ENSMUSG00000079507.10	H2-Q1	342.605	0.866574	0.000695882	0.0151432
ENSMUSG00000066800.11	Rnasel	812.764	0.865102	4e-07	3.58e-05
ENSMUSG00000027377.2	Mall	378.527	0.862987	0.000876894	0.0180354
ENSMUSG00000057346.11	Apol9a	84.8939	0.861648	0.00055411	0.0127299
ENSMUSG00000027508.15	Pag1	218.885	0.852882	0.000672111	0.0147035
ENSMUSG00000040584.8	Abcb1a	413.094	0.851513	0.000788758	0.0166435
ENSMUSG00000025915.14	Sgk3	225.731	0.849365	0.000816906	0.0170568
ENSMUSG00000031662.7	Snx20	63.8103	0.848925	0.00221498	0.0356102
ENSMUSG00000048779.4	P2ry6	252.341	0.83845	0.00138197	0.0255842
ENSMUSG00000055114.7	Anxa13	207.072	0.838404	0.000187443	0.00547234
ENSMUSG00000029335.5	Bmp3	255.411	0.837064	4.6e-05	0.0018384
ENSMUSG00000030200.13	Bcl2l14	400.623	0.835977	2.31e-07	2.29e-05
ENSMUSG00000017861.11	Mybl2	265.754	0.835865	0.00092037	0.0185259
ENSMUSG00000027452.11	Acss1	127.543	0.824004	0.00276171	0.0423762
ENSMUSG00000019970.15	Sgk1	255.24	0.82346	0.0001241	0.00398255
ENSMUSG00000006179.8	Prss16	72.8066	0.823286	0.00250967	0.0392762
ENSMUSG00000039004.5	Bmp6	463.324	0.822214	0.000147375	0.00454383
ENSMUSG00000022043.18	Trim35	80.5986	0.820036	0.0030107	0.045229
ENSMUSG00000032113.15	Chek1	289.678	0.818304	0.0010037	0.019733
ENSMUSG00000063558.4	Aox1	80.2304	0.817177	0.00320061	0.0471564
ENSMUSG00000030017.2	Reg3g	414.758	0.815392	0.000924345	0.0185713
ENSMUSG00000005320.9	Fgfr4	362.298	0.811899	0.00183389	0.0314449
ENSMUSG00000045410.17	Akr1e1	219.866	0.81138	0.00320989	0.0472321
ENSMUSG00000027765.6	P2ry1	141.547	0.808452	0.0024956	0.0391674
ENSMUSG00000072066.6	6720489N17Rik	69.3663	0.805684	0.00205138	0.0340075
ENSMUSG00000032357.12	Tinag	56.8636	0.797429	0.00409907	0.0557267
ENSMUSG00000021707.4	Dhfr	382.763	0.794879	0.00185975	0.0318221
ENSMUSG00000020774.9	Aspa	149.547	0.79481	0.000952245	0.0190622
ENSMUSG00000034584.3	Exph5	315.382	0.794732	0.00019529	0.00566553
ENSMUSG00000027555.8	Car13	172.086	0.793974	0.00172327	0.0301755
ENSMUSG00000030650.17	Tmc5	83.8139	0.791099	0.00484112	0.0628283
ENSMUSG00000023243.8	Kcnk5	145.712	0.79067	1.24e-05	0.000636143
ENSMUSG00000040570.14	Rundc3b	264.278	0.787988	0.00272292	0.0418589
ENSMUSG00000008136.14	Fhl2	988.83	0.787719	2.22e-05	0.00102367
ENSMUSG00000017688.14	Hnf4g	118.744	0.78603	0.00403226	0.0552885
ENSMUSG00000026070.15	Il18r1	308.463	0.785033	0.00022315	0.00623875
ENSMUSG00000074170.5	Plekhf1	182.487	0.784684	5.59e-05	0.00214961
ENSMUSG00000048776.8	Pthlh	404.555	0.782468	9.26e-05	0.00322257
ENSMUSG00000031402.12	Mpp1	288.546	0.782334	0.000223571	0.00623993
ENSMUSG00000029161.7	Cgref1	53.1918	0.781941	0.0029067	0.044001
ENSMUSG00000015093.15	Clic3	75.9058	0.778987	0.00423594	0.0570848
ENSMUSG00000031937.6	Vstm5	147.677	0.778776	0.00088692	0.0181736
ENSMUSG00000028007.13	Snx7	574.815	0.776007	1.39e-05	0.000708069
ENSMUSG00000074272.10	Ceacam1	933.532	0.775536	0.000457946	0.0109317
ENSMUSG00000046688.14	Tifa	814.779	0.774778	2.76e-08	4.22e-06
ENSMUSG00000047443.14	Fam132b	334.548	0.773891	0.00145707	0.026605
ENSMUSG00000048763.11	Hoxb3	136.675	0.772243	0.000344892	0.00877931
ENSMUSG00000022479.15	Vdr	188.872	0.771984	0.00132745	0.0247137
ENSMUSG00000071356.7	Reg3b	161.317	0.771211	NA	NA
ENSMUSG00000043333.12	Rhbdl2	133.233	0.770687	0.000741665	0.015971
ENSMUSG00000021597.16	Slf1	364.56	0.769061	8.27e-05	0.00297925
ENSMUSG00000028307.9	Aldob	134.363	0.767491	0.00627098	0.0758913
ENSMUSG00000021947.10	Cryl1	146.136	0.76604	0.00398419	0.0547204
ENSMUSG00000023070.6	Rgn	55.9736	0.763447	0.00655121	0.0782455
ENSMUSG00000015652.9	Steap1	192.152	0.762322	0.00206878	0.0341587
ENSMUSG00000026463.17	Atp2b4	69.0864	0.761986	0.0055299	0.0692723
ENSMUSG00000064213.5	Defa24	77.8093	0.761605	0.00451235	0.0597841
ENSMUSG00000022422.13	Dscc1	92.1463	0.760956	0.00589356	0.0721877
ENSMUSG00000022656.15	Nectin3	910.4	0.756836	1.55e-05	0.000774048
ENSMUSG00000059842.12	Zfp341	335.052	0.756753	1.01e-05	0.000538424
ENSMUSG00000054469.13	Lclat1	211	0.756275	0.000305173	0.00796493
ENSMUSG00000041301.15	Cftr	498.86	0.75593	0.00391091	0.0541865
ENSMUSG00000026149.2	Tm4sf20	843.479	0.753828	0.000123972	0.00398255
ENSMUSG00000078439.9	Smim24	81.1207	0.753657	0.00442037	0.0588016
ENSMUSG00000003518.13	Dusp3	280.134	0.752324	7.68e-06	0.000430965
ENSMUSG00000029130.12	Rnf32	260.114	0.751571	4.3e-05	0.00174027
ENSMUSG00000045273.8	Cenph	185.797	0.751347	0.00436424	0.05829
ENSMUSG00000022639.14	NA	113.328	0.747978	0.00247677	0.0389831
ENSMUSG00000041827.15	Oasl1	310.401	0.747415	8.49e-05	0.00303757
ENSMUSG00000067206.3	Lrrc66	331.86	0.745918	0.00631837	0.0762411
ENSMUSG00000021569.9	Trip13	226.706	0.745682	0.00407381	0.0556059
ENSMUSG00000035506.16	Slc12a8	109.593	0.745128	0.0052576	0.0667622
ENSMUSG00000068099.4	1500009C09Rik	181.087	0.744866	0.00461563	0.0608105
ENSMUSG00000035864.14	Syt1	85.555	0.743445	0.00346657	0.0497531
ENSMUSG00000038745.15	Nlrp6	135.578	0.742258	0.00819881	0.0926298
ENSMUSG00000045441.5	Gprin3	158.532	0.741611	0.00739256	0.085934
ENSMUSG00000029727.7	Cyp3a13	120.791	0.738925	0.00769953	0.0883198
ENSMUSG00000036875.15	Dna2	240.864	0.738923	0.0047094	0.061652
ENSMUSG00000042489.15	Clspn	423.352	0.733792	0.00558744	0.0696635
ENSMUSG00000030257.16	Srgap3	626.846	0.732653	0.00234843	0.0373913
ENSMUSG00000022218.15	Tgm1	127.766	0.732594	0.00656154	0.0782455
ENSMUSG00000030909.5	Anks4b	215.204	0.729534	0.00661648	0.0786481
ENSMUSG00000074445.4	Sprr2a3	136.662	0.729295	0.00611715	0.0744667
ENSMUSG00000026380.10	Tfcp2l1	138.892	0.726657	0.00438719	0.0585491
ENSMUSG00000078706.4	NA	324.58	0.721849	0.00566196	0.070274
ENSMUSG00000044626.12	Liph	391.89	0.720753	0.00161447	0.0286661
ENSMUSG00000054200.6	Ffar4	111.811	0.720623	0.000141855	0.0043983
ENSMUSG00000056025.12	Clca3a1	106.946	0.716916	0.0102888	0.108284
ENSMUSG00000017146.12	Brca1	771.192	0.716748	0.00465662	0.0611551
ENSMUSG00000039206.13	Daglb	178.256	0.71632	0.00255963	0.0398312
ENSMUSG00000034853.16	Acot11	210.81	0.715806	0.0103059	0.108284
ENSMUSG00000021583.6	Erap1	738.699	0.715276	4.35e-05	0.00175414
ENSMUSG00000044461.5	Shisa2	138.974	0.714885	0.0108282	0.111214
ENSMUSG00000036109.17	Mbnl3	180.14	0.714683	0.00346494	0.0497531
ENSMUSG00000031209.14	Heph	507.51	0.713456	0.0100475	0.106649
ENSMUSG00000026981.15	Il1rn	552.372	0.7132	0.00433249	0.0580423
ENSMUSG00000042333.14	Tnfrsf14	91.5664	0.712395	0.000668521	0.0146683
ENSMUSG00000032890.17	Rims3	77.9973	0.712013	0.0101128	0.107067
ENSMUSG00000021965.2	Ska3	377.472	0.711011	8.69e-05	0.00306954
ENSMUSG00000029378.5	Areg	300.756	0.71032	0.000208617	0.00594325
ENSMUSG00000005470.8	Asf1b	263.48	0.709671	0.00425984	0.0573133
ENSMUSG00000045934.15	Mtmr11	146.039	0.708649	0.0105046	0.10932
ENSMUSG00000036523.16	Greb1	846.78	0.70723	0.0117785	0.11732
ENSMUSG00000044456.16	Rin3	350.485	0.706856	0.00156503	0.0279991
ENSMUSG00000032380.8	Dapk2	134.415	0.705562	0.0101281	0.107124
ENSMUSG00000037188.7	Grhl3	624.327	0.70522	1.62e-06	0.000117833
ENSMUSG00000017499.15	Cdc6	247.928	0.705211	0.00806042	0.0913163
ENSMUSG00000014850.15	Msh3	424.078	0.703206	0.000207689	0.00593654
ENSMUSG00000074867.3	Zfp808	62.3915	0.70319	0.00211031	0.0344991
ENSMUSG00000022899.8	Slc15a2	227.418	0.702828	0.000897196	0.0183032
ENSMUSG00000031971.15	Ccsap	68.2562	0.701492	0.00177433	0.030711
ENSMUSG00000037280.12	Galnt6	340.175	0.700486	0.000241966	0.00663463
ENSMUSG00000025497.14	Cdhr5	296.8	0.700373	0.00509024	0.0651891
ENSMUSG00000020974.5	Pole2	179.831	0.700168	0.00574617	0.0709171
ENSMUSG00000014361.5	Mertk	165.157	0.69739	0.000235488	0.0064956
ENSMUSG00000037572.16	Wdhd1	428.451	0.697347	0.00218842	0.0352885
ENSMUSG00000048012.18	Zfp473	83.3045	0.695736	0.00320189	0.0471564
ENSMUSG00000026315.13	Serpinb8	147.525	0.693949	0.0133277	0.127591
ENSMUSG00000026888.14	Grb14	428.529	0.693612	0.00119648	0.0228514
ENSMUSG00000058624.12	Gda	208.027	0.691811	0.00483162	0.0628034
ENSMUSG00000001270.8	Ckb	136.514	0.691753	0.00326285	0.0478269
ENSMUSG00000021594.10	Srd5a1	628.019	0.69079	0.00348606	0.049829
ENSMUSG00000032344.17	Mb21d1	292.68	0.690126	0.000243717	0.00665582
ENSMUSG00000070661.6	Rnf186	433.405	0.689651	0.000418245	0.0101911
ENSMUSG00000047757.16	Fancb	81.4016	0.689235	0.00524163	0.0666621
ENSMUSG00000026955.13	Sapcd2	334.676	0.689107	0.0126833	0.12394
ENSMUSG00000069833.12	Ahnak	6385.26	0.68894	1.77e-08	2.89e-06
ENSMUSG00000035473.10	Galm	535.652	0.688563	0.00289732	0.044001
ENSMUSG00000039193.7	Nlrc4	474.393	0.68714	0.000289132	0.00764299
ENSMUSG00000005410.5	Mcm5	943.66	0.684339	0.0037554	0.0528093
ENSMUSG00000040658.6	Dnph1	176.583	0.681809	0.00295995	0.044711
ENSMUSG00000055926.2	Gm14137	215.538	0.680786	0.00245937	0.0387462
ENSMUSG00000042961.13	Egflam	53.9865	0.679228	0.0121144	0.119801
ENSMUSG00000028545.13	Bend5	151.789	0.67877	0.0102265	0.107894
ENSMUSG00000039934.12	Gsap	478.277	0.678095	0.0015519	0.027842
ENSMUSG00000020333.17	Acsl6	112.514	0.675937	0.0158052	0.143024
ENSMUSG00000051159.16	Cited1	119.548	0.673852	0.00354761	0.0505335
ENSMUSG00000026271.15	Gpr35	64.1448	0.673711	0.0162731	0.14533
ENSMUSG00000038151.12	Prdm1	525.059	0.673346	0.00187868	0.0320085
ENSMUSG00000026896.14	Ifih1	634.664	0.672328	1.82e-05	0.000875327
ENSMUSG00000022221.13	Ripk3	730.08	0.671282	0.000125081	0.00400623
ENSMUSG00000025875.14	Tspan17	98.9346	0.670367	0.0137285	0.129995
ENSMUSG00000031262.12	Cenpi	309.974	0.669492	0.00794346	0.090551
ENSMUSG00000021714.14	Cenpk	129.037	0.66895	0.0139072	0.130935
ENSMUSG00000048450.10	Msx1	1075.4	0.668521	5.99e-05	0.00227595
ENSMUSG00000028600.15	Podn	203.64	0.66824	0.0107472	0.110817
ENSMUSG00000035349.5	Mia2	163.506	0.667282	0.00322868	0.0474302
ENSMUSG00000034634.7	Ly6d	402.165	0.665769	3.74e-05	0.00155144
ENSMUSG00000016200.13	Syt14	121.05	0.664172	0.0153897	0.141303
ENSMUSG00000022014.14	Epsti1	320.278	0.663013	0.000788332	0.0166435
ENSMUSG00000002847.6	Pla1a	412.94	0.661774	0.00696794	0.0817469
ENSMUSG00000040483.15	Xaf1	868.115	0.66134	1.71e-10	4.86e-08
ENSMUSG00000067235.14	H2-Q10	61.943	0.657482	0.0188262	0.159824
ENSMUSG00000020638.7	Cmpk2	149.247	0.65668	0.00456505	0.0602886
ENSMUSG00000028159.14	Dapp1	369.199	0.656264	0.00210755	0.0344881
ENSMUSG00000052415.5	Tchh	294.684	0.655074	0.0114162	0.114893
ENSMUSG00000060550.15	H2-Q7	257.871	0.653088	0.0188048	0.159725
ENSMUSG00000039131.15	Gipc2	418.18	0.652831	0.000256423	0.00695675
ENSMUSG00000043501.4	Lgals2	395.841	0.652802	0.00299498	0.045075
ENSMUSG00000039005.13	Tlr4	208.937	0.650531	0.0136018	0.129166
ENSMUSG00000034275.17	Igsf9b	55.099	0.648859	0.0168012	0.148011
ENSMUSG00000026646.16	Suv39h2	220.748	0.64877	0.00305491	0.0457266
ENSMUSG00000002835.8	Chaf1a	567.248	0.648387	0.00652906	0.0780978
ENSMUSG00000045545.8	Krt14	209.638	0.647967	0.0128147	0.124758
ENSMUSG00000034171.13	Faah	1429.8	0.643601	1.73e-06	0.00012407
ENSMUSG00000026147.16	Col9a1	113.333	0.643599	0.000998925	0.0196861
ENSMUSG00000051435.11	Fhad1	71.7953	0.643218	0.00648875	0.0777848
ENSMUSG00000039470.15	Zdhhc2	431.015	0.643035	0.00464588	0.0610628
ENSMUSG00000024556.3	Me2	750.276	0.642299	1.48e-05	0.000751263
ENSMUSG00000038732.14	Mboat1	764.048	0.642214	0.00285735	0.0435199
ENSMUSG00000001123.15	Lgals9	1224.49	0.639638	2.63e-07	2.53e-05
ENSMUSG00000024730.7	Ms4a8a	123.486	0.638789	0.0130136	0.125752
ENSMUSG00000043154.15	Ppp2r3a	1202	0.638772	0.000419803	0.0102133
ENSMUSG00000078773.11	Rad54b	233.865	0.638603	0.0125934	0.123354
ENSMUSG00000097651.1	NA	383.988	0.638135	2.2e-05	0.00101945
ENSMUSG00000036813.11	Entpd8	528.96	0.637942	0.00596957	0.0730475
ENSMUSG00000042167.5	Papd4	266.759	0.637685	0.000208022	0.00593654
ENSMUSG00000024027.7	Glp1r	193.428	0.637477	0.00908367	0.0996907
ENSMUSG00000021692.8	Dimt1	86.8381	0.637453	0.00177333	0.030711
ENSMUSG00000021360.15	Gcnt2	1058.94	0.63745	6.24e-08	7.74e-06
ENSMUSG00000038721.8	Hoxb7	410.54	0.636682	0.000117253	0.00381478
ENSMUSG00000032470.16	Mras	515.884	0.636434	0.00052151	0.0121846
ENSMUSG00000048373.8	Fgfbp1	452.969	0.635848	8.35e-05	0.00300121
ENSMUSG00000039748.11	Exo1	319.675	0.635376	0.0160955	0.144448
ENSMUSG00000037185.8	Krt80	172.487	0.63518	0.0169414	0.149039
ENSMUSG00000037921.14	Ddx60	469.864	0.634744	0.0104771	0.109149
ENSMUSG00000055612.15	Cdca7	738.811	0.632739	0.00602033	0.0735515
ENSMUSG00000036553.16	Sh3tc1	75.7606	0.632128	0.0242121	0.187502
ENSMUSG00000024691.13	Fam111a	362.85	0.630877	0.00488564	0.0631618
ENSMUSG00000045751.16	Mms22l	455.551	0.630044	0.000567969	0.012958
ENSMUSG00000027323.10	Rad51	473.106	0.629647	0.0147825	0.137373
ENSMUSG00000026405.14	C4bp	66.8703	0.629467	0.0249366	0.190784
ENSMUSG00000025176.14	Hoga1	93.8864	0.629349	0.0151444	0.139791
ENSMUSG00000024743.14	Syt7	109.673	0.628601	0.0168506	0.14832
ENSMUSG00000051220.2	Ercc6l	387.568	0.628597	0.0132401	0.127048
ENSMUSG00000042029.6	Ncapg2	1159.47	0.625795	0.00371071	0.0523595
ENSMUSG00000061356.13	Nuggc	464.888	0.625793	0.00700079	0.0820739
ENSMUSG00000074886.10	Grk6	915.533	0.625744	9.86e-07	8.01e-05
ENSMUSG00000000028.14	Cdc45	379.716	0.624739	0.0117854	0.11732
ENSMUSG00000031523.16	Dlc1	114.49	0.624381	0.0156781	0.142328
ENSMUSG00000029273.10	Sult1d1	109.73	0.62417	0.0256463	0.194451
ENSMUSG00000026640.12	Plxna2	861.653	0.62399	0.000971758	0.0193409
ENSMUSG00000018909.15	Arrb1	1219.14	0.623832	5.41e-11	1.68e-08
ENSMUSG00000071537.6	Klrg2	62.8546	0.62276	0.0184544	0.157886
ENSMUSG00000078521.2	Aunip	106.98	0.621901	0.0234557	0.18354
ENSMUSG00000033857.12	Engase	597.219	0.621498	0.00103961	0.0202939
ENSMUSG00000042367.12	Gjb3	302.552	0.621342	0.00777048	0.0887632
ENSMUSG00000033107.5	Rnf125	70.25	0.61977	0.00569664	0.0705981
ENSMUSG00000078945.10	Naip2	283.54	0.619679	0.00232057	0.0370192
ENSMUSG00000058290.3	Espl1	818.668	0.619171	0.0166416	0.147281
ENSMUSG00000020303.2	Stc2	1061.44	0.618382	0.000181986	0.00536494
ENSMUSG00000102224.5	NA	383.358	0.618354	0.0111062	0.112806
ENSMUSG00000024883.6	Rin1	355.202	0.617336	0.0143227	0.133855
ENSMUSG00000025395.14	Prim1	400.993	0.616665	0.00540186	0.06807
ENSMUSG00000028933.11	Xrcc2	122.915	0.615895	0.0103211	0.1083
ENSMUSG00000097415.2	NA	442.689	0.615771	0.00149097	0.0269962
ENSMUSG00000035164.7	Zc3h12c	870.354	0.615677	0.00025926	0.00701705
ENSMUSG00000040213.13	Ccbl2	109.901	0.615321	0.00837331	0.0939577
ENSMUSG00000007080.14	Pole	749.003	0.613867	0.00941464	0.102033
ENSMUSG00000021701.7	Plk2	1470.07	0.613676	9.52e-09	1.77e-06
ENSMUSG00000022034.9	Esco2	492.591	0.613667	0.020613	0.169413
ENSMUSG00000030223.14	Ptpro	479.903	0.613557	1.84e-05	0.00088131
ENSMUSG00000034875.5	Nudt19	181.46	0.61347	0.00746577	0.0865047
ENSMUSG00000060147.15	Serpinb6a	625.859	0.612975	0.00440558	0.0586996
ENSMUSG00000022018.7	Rgcc	66.0764	0.612774	0.0277414	0.205024
ENSMUSG00000026979.16	Psd4	409.024	0.612519	0.0112475	0.113681
ENSMUSG00000036834.16	Plch1	727.282	0.611314	0.00316887	0.0467954
ENSMUSG00000018907.10	Alox12e	1735.59	0.611191	0.000775264	0.0164794
ENSMUSG00000038059.6	Smim3	314.473	0.611079	0.00337253	0.0488839
ENSMUSG00000039994.15	Timeless	599.435	0.610352	0.00822204	0.0927017
ENSMUSG00000024066.8	Xdh	201.6	0.61024	0.0135872	0.129102
ENSMUSG00000054733.8	Msra	115.26	0.609505	0.00767743	0.0881889
ENSMUSG00000042873.11	Lhfpl4	57.993	0.60863	0.0301253	0.215741
ENSMUSG00000051727.14	Kctd14	102.152	0.607935	0.0278314	0.205405
ENSMUSG00000000216.8	Scnn1g	77.5618	0.607495	0.0181998	0.156667
ENSMUSG00000044934.12	Zfp367	690.268	0.60652	0.00658359	0.0784089
ENSMUSG00000052776.10	Oas1a	126.039	0.606506	0.0024525	0.0386749
ENSMUSG00000020185.16	E2f7	241.291	0.606436	0.0223585	0.178739
ENSMUSG00000021474.8	Sfxn1	962.804	0.606206	4.84e-06	0.000291089
ENSMUSG00000006585.2	Cdt1	652.634	0.604812	0.00263191	0.0407637
ENSMUSG00000078495.10	Gm13157	167.289	0.60425	0.00532072	0.0673747
ENSMUSG00000068101.10	Cenpm	191.605	0.603562	0.0220876	0.177551
ENSMUSG00000036863.11	Syde2	199.494	0.602883	0.00224555	0.0359965
ENSMUSG00000079173.11	Zan	202.052	0.602857	0.00629137	0.0760822
ENSMUSG00000015850.11	Adamtsl4	798.186	0.602555	0.000542764	0.0125566
ENSMUSG00000025037.6	Maoa	384.942	0.602231	0.00316663	0.0467954
ENSMUSG00000096054.2	Syne1	88.1595	0.602098	0.0310242	0.220105
ENSMUSG00000033762.7	Recql4	121.286	0.601997	0.0182073	0.156667
ENSMUSG00000046804.13	Phgr1	73.3749	0.601602	0.0285732	0.208916
ENSMUSG00000025498.14	Irf7	745.158	0.601426	1.68e-07	1.76e-05
ENSMUSG00000019845.7	Tube1	143.508	0.601183	0.00964794	0.103811
ENSMUSG00000042976.5	NA	61.3923	0.601119	0.0322454	0.224995
ENSMUSG00000103067.1	NA	74.3748	0.599963	0.0326286	0.226788
ENSMUSG00000026259.14	Ngef	835.086	0.599921	0.000667564	0.0146683
ENSMUSG00000047728.12	BC025446	182.617	0.599317	0.0188702	0.159951
ENSMUSG00000034762.9	Glis1	64.1334	0.598958	0.0295265	0.212588
ENSMUSG00000007872.3	Id3	778.096	0.598357	0.0102168	0.107891
ENSMUSG00000034570.12	Inpp5j	321.037	0.598262	0.000160961	0.00482938
ENSMUSG00000029334.14	Prkg2	933.158	0.597755	0.0327466	0.227012
ENSMUSG00000032014.5	Oaf	176.616	0.597721	0.0105243	0.109457
ENSMUSG00000032224.14	Fam81a	88.6141	0.597608	0.0221119	0.177617
ENSMUSG00000047767.16	Atg16l2	436.303	0.597243	0.000114747	0.00374804
ENSMUSG00000021485.13	Mxd3	173.898	0.596601	0.0332216	0.229477
ENSMUSG00000091971.3	Hspa1a	66.6864	0.596068	0.0149616	0.138414
ENSMUSG00000050957.4	Insl6	141.747	0.596015	0.0187854	0.159642
ENSMUSG00000017550.14	Atad5	377.49	0.594916	0.000770151	0.016413
ENSMUSG00000057842.13	Zfp595	159.308	0.594891	0.000645609	0.0142944
ENSMUSG00000038644.14	Pold1	963.112	0.594743	0.00449555	0.0596573
ENSMUSG00000034919.2	Ttc22	120.279	0.592644	0.0308257	0.219168
ENSMUSG00000024640.9	Psat1	990.321	0.592177	0.000529857	0.0123099
ENSMUSG00000019888.15	Mgat4c	259.722	0.591981	0.0262481	0.197429
ENSMUSG00000054161.10	Fam83e	1198.39	0.591677	2.82e-06	0.000186063
ENSMUSG00000024222.16	Fkbp5	526.153	0.589974	0.00152761	0.0275688
ENSMUSG00000020826.6	Nos2	157.841	0.589507	0.0337867	0.231923
ENSMUSG00000022021.13	Diaph3	436.144	0.58923	0.0269354	0.200316
ENSMUSG00000020159.8	Gabrp	2342.88	0.588077	0.011666	0.116549
ENSMUSG00000035455.12	Fignl1	415.383	0.587304	0.0249088	0.190784
ENSMUSG00000021532.10	Fastkd3	217.955	0.587095	0.00169987	0.0299246
ENSMUSG00000001228.14	Uhrf1	830.842	0.587023	0.00529819	0.0671742
ENSMUSG00000001542.6	Ell2	599.067	0.585972	0.000136051	0.00427344
ENSMUSG00000046314.15	Stxbp6	588.16	0.58477	0.0116898	0.11658
ENSMUSG00000047557.2	Lxn	156.709	0.584334	0.0213483	0.173501
ENSMUSG00000042757.15	Tmem108	149.332	0.583169	0.00403772	0.0553174
ENSMUSG00000034329.16	Brip1	345.725	0.582864	0.0330847	0.228722
ENSMUSG00000055044.12	Pdlim1	354.413	0.582221	0.00381647	0.0532594
ENSMUSG00000047638.15	Nr1h4	54.9684	0.581802	0.0280879	0.206282
ENSMUSG00000026413.12	Pkp1	2063.8	0.581518	0.000158734	0.00478668
ENSMUSG00000027203.15	Dut	367.36	0.580391	0.0104447	0.109149
ENSMUSG00000051278.12	Zgrf1	176.425	0.579705	0.0277238	0.205024
ENSMUSG00000023345.15	Poc1a	205.058	0.579138	0.0267542	0.199838
ENSMUSG00000041886.6	Macc1	693.5	0.578678	8.96e-05	0.00314527
ENSMUSG00000056749.7	Nfil3	391.062	0.578515	0.00497247	0.0640789
ENSMUSG00000024411.9	Aqp4	483.079	0.577354	0.0111551	0.113066
ENSMUSG00000020534.14	Shmt1	778.356	0.576695	0.00159817	0.0284378
ENSMUSG00000069910.2	Spdl1	342.055	0.576079	0.00602783	0.0735515
ENSMUSG00000021765.7	Fst	598.802	0.575106	0.0106132	0.109965
ENSMUSG00000043336.14	Filip1l	987.95	0.574268	6.69e-05	0.00248604
ENSMUSG00000025997.13	Ikzf2	101.579	0.57355	0.0378958	0.249937
ENSMUSG00000024922.1	Ovol1	338.065	0.573097	7.94e-05	0.00287704
ENSMUSG00000103260.1	NA	108.482	0.572842	0.00942808	0.102048
ENSMUSG00000074476.5	Spc24	164.09	0.572836	0.0403107	0.257923
ENSMUSG00000021108.17	Prkch	353.904	0.572738	0.000101065	0.00342631
ENSMUSG00000073705.10	Apitd1	86.5492	0.572308	0.0199758	0.165745
ENSMUSG00000050747.14	Trim15	90.5175	0.572238	0.0229418	0.181151
ENSMUSG00000083668.1	NA	180.755	0.572189	0.0133556	0.12771
ENSMUSG00000028438.16	Kif24	227.267	0.572111	0.0189912	0.160533
ENSMUSG00000052373.14	Mpp3	127.322	0.57147	0.0192073	0.161549
ENSMUSG00000018411.17	Mapt	53.3426	0.570961	0.0314589	0.222103
ENSMUSG00000032815.15	Fanca	307.898	0.569615	0.0177562	0.153666
ENSMUSG00000034773.16	BC030867	154.358	0.569335	0.0373116	0.247761
ENSMUSG00000035834.11	Polr3g	331.569	0.569157	0.000911779	0.0184311
ENSMUSG00000031173.13	Otc	55.6892	0.568951	0.0276164	0.204366
ENSMUSG00000026235.14	Epha4	491.35	0.56869	0.0420187	0.264845
ENSMUSG00000041995.7	Zbed3	376.962	0.568546	0.00353093	0.050383
ENSMUSG00000047547.14	Cltb	659.237	0.566512	0.000197753	0.0057227
ENSMUSG00000036902.9	Neto2	80.8042	0.565757	0.0430072	0.269122
ENSMUSG00000030254.16	Rad18	548.807	0.565712	0.0037955	0.0531466
ENSMUSG00000037474.13	Dtl	878.73	0.565206	0.0154351	0.141458
ENSMUSG00000026779.6	Mastl	602.522	0.565174	0.0318013	0.223028
ENSMUSG00000024302.15	Dtna	91.61	0.564333	0.0366144	0.245288
ENSMUSG00000097258.1	NA	116.225	0.563827	0.0392035	0.255626
ENSMUSG00000021211.3	Akr1c12	283.684	0.563415	0.00200592	0.0334556
ENSMUSG00000072980.3	Oip5	206.063	0.563374	0.0160408	0.144271
ENSMUSG00000050107.2	Gsg2	291.792	0.563034	0.00688829	0.0811588
ENSMUSG00000030528.12	Blm	463.185	0.562768	0.0111632	0.113066
ENSMUSG00000027115.14	Kif18a	339.743	0.562709	0.041556	0.263034
ENSMUSG00000071281.10	Zfp65	227.588	0.56203	0.0136217	0.129281
ENSMUSG00000029521.7	Chek2	477.808	0.561283	0.00261905	0.0406409
ENSMUSG00000057982.7	Zfp809	374.898	0.561076	0.000674895	0.0147449
ENSMUSG00000026489.13	Adck3	207.467	0.560195	0.0190624	0.160836
ENSMUSG00000025227.14	Tmem180	156.358	0.559384	0.0268863	0.200131
ENSMUSG00000038816.14	Ctnnal1	495.751	0.559359	1.99e-05	0.000939503
ENSMUSG00000050410.15	Tcf19	229.64	0.558395	0.0339304	0.232196
ENSMUSG00000069743.4	Zfp820	194.894	0.557781	0.00798773	0.09093
ENSMUSG00000034206.15	Polq	220.508	0.557574	0.0453095	0.277321
ENSMUSG00000041747.2	Utp15	676.383	0.557074	8.68e-05	0.00306954
ENSMUSG00000021646.8	Mccc2	379.588	0.555993	0.00385463	0.0537012
ENSMUSG00000022747.16	St3gal6	162.772	0.555528	0.0150126	0.138808
ENSMUSG00000030346.16	Rad51ap1	283.426	0.554336	0.0399883	0.257157
ENSMUSG00000035165.13	Kcne3	839.612	0.553505	3.3e-06	0.000215088
ENSMUSG00000039179.13	Tekt5	61.5134	0.552945	0.0374227	0.248021
ENSMUSG00000098207.1	Arl14	476.522	0.552537	0.00672905	0.0797382
ENSMUSG00000028033.16	Kcnq5	234.642	0.552036	0.00719068	0.0839421
ENSMUSG00000035024.15	Ncapd3	1258.68	0.551989	0.003446	0.0496435
ENSMUSG00000028718.16	Stil	657.609	0.549695	0.0255394	0.193778
ENSMUSG00000037466.13	4930427A07Rik	505.334	0.549134	0.0126048	0.123392
ENSMUSG00000029283.17	Cdc7	279.278	0.548542	0.0199111	0.165291
ENSMUSG00000032373.14	Car12	155.844	0.546508	0.037848	0.249893
ENSMUSG00000021650.6	Ptcd2	473.545	0.546479	6.55e-06	0.000383237
ENSMUSG00000035896.4	Rnase1	99.3608	0.545903	0.0512277	0.299016
ENSMUSG00000041774.14	Ydjc	184.703	0.545856	0.00952617	0.102603
ENSMUSG00000045827.10	Serpinb9	138.024	0.545071	0.0432298	0.2699
ENSMUSG00000026134.11	Prim2	260.84	0.544902	0.0136308	0.129293
ENSMUSG00000029556.12	Hnf1a	331.284	0.54465	0.0223657	0.178739
ENSMUSG00000035683.13	Melk	978.981	0.543476	0.00536647	0.0678314
ENSMUSG00000078234.6	Klhdc7a	493.1	0.542507	0.0443813	0.274286
ENSMUSG00000001420.13	Tmem79	256.404	0.542479	0.00715858	0.0836267
ENSMUSG00000059839.8	Zfp874b	251.797	0.542245	0.00362447	0.0513622
ENSMUSG00000078920.2	Ifi47	244.258	0.541249	0.015458	0.141501
ENSMUSG00000059060.13	Rad51b	57.7232	0.541219	0.040628	0.259048
ENSMUSG00000031613.8	Hpgd	65.2775	0.540724	0.0533198	0.306309
ENSMUSG00000025813.13	Homer2	1250.28	0.540476	0.000384741	0.00954331
ENSMUSG00000027763.13	Mbnl1	1822.75	0.539798	1.73e-05	0.000839018
ENSMUSG00000025001.11	Hells	1106.78	0.538707	0.0102974	0.108284
ENSMUSG00000032350.8	Gclc	618.686	0.538493	4.17e-05	0.00169943
ENSMUSG00000056899.10	Immp2l	95.6332	0.537506	0.0141563	0.132525
ENSMUSG00000021645.16	Smn1	304.159	0.537017	0.00343317	0.0495446
ENSMUSG00000019982.14	Myb	305.366	0.536713	0.0448643	0.275927
ENSMUSG00000053137.6	Mapk11	546.946	0.536654	0.00423171	0.0570745
ENSMUSG00000040703.11	Cyp2s1	381.772	0.5366	0.00164857	0.0292085
ENSMUSG00000039187.16	Fanci	280.582	0.536566	0.0437442	0.271877
ENSMUSG00000041147.10	Brca2	555.295	0.536521	0.0149066	0.13806
ENSMUSG00000056632.7	Dsg3	309.131	0.53637	0.0393488	0.255626
ENSMUSG00000081578.2	NA	56.0789	0.536243	0.0291737	0.210784
ENSMUSG00000006678.6	Pola1	577.125	0.535269	0.0314273	0.22201
ENSMUSG00000087700.1	NA	95.6415	0.535011	0.0342405	0.233387
ENSMUSG00000020798.14	Spns3	62.6326	0.534983	0.0555604	0.313859
ENSMUSG00000105456.1	NA	56.8572	0.534924	0.0316777	0.222666
ENSMUSG00000021670.14	Hmgcr	1965.23	0.534888	0.000274156	0.00732934
ENSMUSG00000046598.14	Bdh1	446.855	0.534544	0.0115397	0.115783
ENSMUSG00000047143.3	Dmrta2	274.839	0.533761	0.00302712	0.0454344
ENSMUSG00000022322.7	Shcbp1	349.056	0.533692	0.051265	0.299016
ENSMUSG00000029322.12	Plac8	566.644	0.533419	0.00678555	0.08012
ENSMUSG00000089982.7	NA	91.8195	0.53272	0.0482697	0.288587
ENSMUSG00000046591.10	Ticrr	542.502	0.532621	0.0248968	0.190784
ENSMUSG00000031821.11	Gins2	230.113	0.532103	0.0130798	0.126171
ENSMUSG00000052485.7	Tmem171	610.31	0.532028	1.17e-05	0.000605198
ENSMUSG00000078941.9	Ak6	227.607	0.531841	0.0013467	0.0250157
ENSMUSG00000028873.16	Cdca8	733.493	0.53146	0.0275852	0.204281
ENSMUSG00000037020.16	Wdr62	337.07	0.531173	0.00166647	0.0294623
ENSMUSG00000026622.15	Nek2	803.96	0.530788	0.040849	0.259782
ENSMUSG00000087060.7	NA	95.3975	0.530563	0.0339129	0.232196
ENSMUSG00000021699.17	Pde4d	497.73	0.530374	0.00117321	0.0225286
ENSMUSG00000026104.14	Stat1	660.704	0.527708	7.98e-05	0.00288059
ENSMUSG00000045917.17	6330416G13Rik	352.688	0.527372	0.00105766	0.0205976
ENSMUSG00000022186.14	Oxct1	1220.28	0.527216	0.00107453	0.0208523
ENSMUSG00000020182.16	Ddc	54.0423	0.526895	0.039193	0.255626
ENSMUSG00000034607.6	Pof1b	837.316	0.525871	0.000195434	0.00566553
ENSMUSG00000042015.16	Wdr41	346.167	0.525361	0.00603751	0.0735515
ENSMUSG00000030208.15	Emp1	1628.37	0.524549	0.000157043	0.00475307
ENSMUSG00000027168.21	Pax6	842.381	0.524402	0.000345464	0.00878032
ENSMUSG00000021595.18	Nsun2	1739.76	0.52331	7.58e-05	0.00277964
ENSMUSG00000017167.6	Cntnap1	352.661	0.523054	0.00100103	0.0197039
ENSMUSG00000043705.6	Capn13	61.1778	0.522617	0.0550018	0.31145
ENSMUSG00000032902.1	Slc16a1	1143.33	0.522325	0.000173988	0.00516175
ENSMUSG00000050730.16	Arhgap42	2104.91	0.522286	0.000354998	0.00898113
ENSMUSG00000027375.14	Mal	822.647	0.522087	0.0326412	0.226788
ENSMUSG00000041632.5	Mrps27	311.939	0.522066	0.00287833	0.0437989
ENSMUSG00000037946.11	Fgd3	614.627	0.522031	0.000265612	0.00714726
ENSMUSG00000056313.5	1810011O10Rik	240.345	0.521634	0.0191595	0.161325
ENSMUSG00000053964.16	Lgals4	1160.59	0.520659	0.00776873	0.0887632
ENSMUSG00000015085.8	Entpd2	299.44	0.520329	0.00313894	0.0465399
ENSMUSG00000001517.14	Foxm1	776.443	0.520211	0.0454186	0.277577
ENSMUSG00000079018.10	Ly6c1	290.583	0.519958	0.0473025	0.284821
ENSMUSG00000040675.17	Mthfd1l	942.939	0.519589	0.00357689	0.0508627
ENSMUSG00000021494.8	Ddx41	671.211	0.518347	0.000823491	0.0171292
ENSMUSG00000020227.10	Irak3	70.0133	0.515445	0.0406944	0.259171
ENSMUSG00000039145.16	Camk1d	1583.06	0.515378	0.00158098	0.0282232
ENSMUSG00000026880.11	Stom	1055.66	0.515091	0.000832072	0.0172797
ENSMUSG00000024791.10	Cdca5	362.983	0.51436	0.0187772	0.159642
ENSMUSG00000025279.7	Dnase1l3	72.7854	0.513079	0.0395742	0.255696
ENSMUSG00000079620.13	Muc4	1146.25	0.51273	0.0674121	0.354467
ENSMUSG00000090659.8	Zfp493	76.2548	0.512109	0.041022	0.260515
ENSMUSG00000042215.8	Bag2	363.955	0.510975	0.0212095	0.172666
ENSMUSG00000036249.16	Rbm43	145.88	0.51055	0.0263233	0.197905
ENSMUSG00000027454.10	Gins1	156.294	0.510538	0.0420997	0.264945
ENSMUSG00000020649.11	Rrm2	343.468	0.510346	0.0534363	0.306478
ENSMUSG00000063646.13	Jakmip1	235.217	0.510344	0.0460854	0.280106
ENSMUSG00000029923.4	Rab19	64.3495	0.509981	0.0582299	0.322749
ENSMUSG00000006398.15	Cdc20	668.863	0.50991	0.0406532	0.259051
ENSMUSG00000042745.9	Id1	792.251	0.509678	0.00564044	0.0700595
ENSMUSG00000028587.18	Orc1	76.6648	0.508591	0.0605889	0.331371
ENSMUSG00000025007.13	Aldh18a1	893.462	0.508583	0.00118532	0.0226819
ENSMUSG00000002870.8	Mcm2	1262.82	0.508147	0.00881023	0.0973375
ENSMUSG00000026683.14	Nuf2	399.886	0.507051	0.0570792	0.319701
ENSMUSG00000064326.12	Siva1	128.684	0.5069	0.0129847	0.12562
ENSMUSG00000026321.7	Tnfrsf11a	694.315	0.506719	0.000176581	0.00521991
ENSMUSG00000028786.15	Tmem54	528.174	0.506429	0.00217893	0.0352448
ENSMUSG00000034205.16	Loxl2	150.142	0.506266	0.0629235	0.339643
ENSMUSG00000022673.4	Mcm4	1339.5	0.505997	0.010471	0.109149
ENSMUSG00000083139.1	NA	145.416	0.505857	0.00304124	0.0455785
ENSMUSG00000072082.6	Ccnf	613.767	0.505706	0.0328224	0.227291
ENSMUSG00000040600.9	Eps8l3	933.295	0.505616	0.0146582	0.136449
ENSMUSG00000053007.8	9430076C15Rik	381.617	0.50459	0.0161534	0.144653
ENSMUSG00000037419.8	Endod1	1844.43	0.504557	0.000137635	0.00429979
ENSMUSG00000042129.8	Rassf4	947.879	0.504485	0.0019484	0.0328618
ENSMUSG00000031756.4	Cenpn	139.103	0.503933	0.0629514	0.339643
ENSMUSG00000027624.17	Epb41l1	695.703	0.503314	0.00915253	0.10018
ENSMUSG00000079685.9	Ulbp1	145.716	0.502162	0.064786	0.344724
ENSMUSG00000107211.1	NA	107.019	0.501789	0.0353366	0.238948
ENSMUSG00000026274.11	Pask	451.566	0.501265	0.0261994	0.197153
ENSMUSG00000029730.16	Mcm7	720.062	0.501036	0.00662275	0.0786481
ENSMUSG00000031803.7	B3gnt3	723.684	0.5002	0.00387807	0.0539328
ENSMUSG00000028551.14	Cdkn2c	397.952	0.499872	0.0192908	0.162018
ENSMUSG00000021697.12	Depdc1b	123.232	0.499641	0.0740382	0.375541
ENSMUSG00000019773.7	Fbxo5	356.685	0.49954	0.0535652	0.306791
ENSMUSG00000021694.18	Ercc8	177.799	0.499414	0.022191	0.178035
ENSMUSG00000041406.14	BC055324	337.459	0.499344	0.00832112	0.093563
ENSMUSG00000036223.15	Ska1	140.275	0.499234	0.0749593	0.378236
ENSMUSG00000017144.8	Rnd3	824.217	0.49918	0.000752061	0.0161527
ENSMUSG00000018920.11	Cxcl16	550.139	0.49907	0.00571959	0.0707231
ENSMUSG00000026971.15	Itgb6	391.8	0.498881	0.0418784	0.264101
ENSMUSG00000032712.16	2810474O19Rik	1294.7	0.49886	0.000365143	0.00916748
ENSMUSG00000032278.11	Paqr5	185.645	0.498257	0.0362032	0.24295
ENSMUSG00000032400.17	Zwilch	435.872	0.497958	0.0570784	0.319701
ENSMUSG00000040204.6	2810417H13Rik	518.179	0.49776	0.0576995	0.321104
ENSMUSG00000098905.1	Zfp953	196.76	0.497752	0.0123233	0.121357
ENSMUSG00000060268.11	Gm1661	51.3375	0.496134	0.0771503	0.384702
ENSMUSG00000004880.11	Lbr	1236.71	0.495368	6.46e-05	0.00242082
ENSMUSG00000024232.1	Bambi	205.687	0.495303	0.0549232	0.311112
ENSMUSG00000048992.8	Prss32	405.934	0.495139	0.00202564	0.0337468
ENSMUSG00000026429.8	Ube2t	393.337	0.495112	0.017559	0.152494
ENSMUSG00000021678.8	F2rl1	1870.56	0.49432	9.5e-05	0.00329152
ENSMUSG00000033530.7	Ttc7b	158.462	0.494284	0.0162289	0.145014
ENSMUSG00000041417.15	Pik3r1	892.519	0.493688	0.00503773	0.0647176
ENSMUSG00000031245.8	Hmgn5	433.737	0.493332	0.0115758	0.116004
ENSMUSG00000030641.9	Ddias	136.437	0.493078	0.0580569	0.32257
ENSMUSG00000069184.2	Zfp72	79.344	0.492394	0.0490734	0.29128
ENSMUSG00000039158.11	Akna	68.8961	0.492389	0.0612462	0.334079
ENSMUSG00000014444.16	Piezo1	917.027	0.492298	0.025734	0.194716
ENSMUSG00000042590.16	Ipo11	750.491	0.492081	0.00269211	0.0415401
ENSMUSG00000062510.12	Nsl1	228.738	0.492029	0.0541305	0.308649
ENSMUSG00000026196.7	Bard1	336.207	0.491937	0.0636365	0.341472
ENSMUSG00000042115.4	Klhdc8a	62.6441	0.491731	0.0747722	0.37764
ENSMUSG00000089789.1	Rdh1	126.148	0.491633	0.00874365	0.0969916
ENSMUSG00000064165.8	Krt39	90.0688	0.491218	0.0800725	0.392044
ENSMUSG00000038507.6	Parp12	675.204	0.490765	4.96e-05	0.00195315
ENSMUSG00000019214.13	Chtf18	216.701	0.489381	0.0650292	0.345572
ENSMUSG00000031838.7	Ifi30	238.178	0.489043	0.0191561	0.161325
ENSMUSG00000002055.9	Spag5	1124.21	0.48898	0.0477511	0.286676
ENSMUSG00000061533.15	Cep128	146.243	0.488416	0.0511168	0.298891
ENSMUSG00000078994.8	Zfp429	156.609	0.488276	0.0133019	0.127419
ENSMUSG00000082279.1	NA	76.5569	0.488039	0.0725912	0.370825
ENSMUSG00000007655.16	Cav1	629.711	0.487052	0.0436696	0.271809
ENSMUSG00000025878.16	Uimc1	594.658	0.486846	0.000200531	0.00576264
ENSMUSG00000027424.11	Mgme1	376.681	0.48684	0.000782911	0.0165794
ENSMUSG00000038252.13	Ncapd2	1985.74	0.486561	0.0317222	0.222666
ENSMUSG00000104394.2	NA	73.0858	0.486548	0.0387416	0.25363
ENSMUSG00000032006.14	Pdgfd	157.438	0.486454	0.0744788	0.376896
ENSMUSG00000060615.5	Ang4	89.2311	0.486409	0.0227097	0.180181
ENSMUSG00000050359.7	Sprr1a	429.196	0.486018	0.00886774	0.0977186
ENSMUSG00000028986.12	Klhl7	385.455	0.485381	0.00251487	0.0393201
ENSMUSG00000068246.5	Apol9b	71.0554	0.485058	0.0681786	0.357358
ENSMUSG00000100826.6	NA	732.003	0.484983	0.0398972	0.256935
ENSMUSG00000035852.10	Misp	1419.44	0.48396	1.56e-05	0.000776153
ENSMUSG00000022330.4	Osr2	593.272	0.483896	0.00240804	0.0381196
ENSMUSG00000041859.10	Mcm3	1534.19	0.483547	0.00895977	0.0985933
ENSMUSG00000020897.12	Aurkb	805.907	0.483226	0.0581979	0.322744
ENSMUSG00000047281.3	Sfn	275.631	0.483165	0.0166604	0.147353
ENSMUSG00000021557.14	Agtpbp1	93.2274	0.483164	0.038198	0.251227
ENSMUSG00000044792.6	Isca1	254.602	0.482897	0.00140261	0.0258793
ENSMUSG00000027331.15	Knstrn	921.829	0.482865	0.0617866	0.33571
ENSMUSG00000057440.7	Mpp7	547.32	0.482777	0.00446983	0.0593638
ENSMUSG00000028132.15	Tmem56	712.942	0.482735	0.0165656	0.147189
ENSMUSG00000030587.4	2200002D01Rik	280.45	0.482658	0.0194309	0.162659
ENSMUSG00000022369.13	Mtbp	515.916	0.482514	0.00391246	0.0541865
ENSMUSG00000032899.14	Styk1	628.972	0.482447	0.0127991	0.124702
ENSMUSG00000021572.8	Cep72	518.359	0.482018	0.0287222	0.209096
ENSMUSG00000027490.17	E2f1	354.38	0.481943	0.0592273	0.325978
ENSMUSG00000029752.12	Asns	1058.69	0.481874	0.000389902	0.0096568
ENSMUSG00000074876.5	NA	219.601	0.48183	0.0172012	0.150522
ENSMUSG00000028702.15	Rad54l	259.369	0.480595	0.0757642	0.380783
ENSMUSG00000013155.9	Enkd1	179.797	0.480365	0.0194378	0.162659
ENSMUSG00000023015.13	Racgap1	1193.59	0.479961	0.0478998	0.287207
ENSMUSG00000027242.14	Wdr76	312.768	0.47899	0.0038621	0.0537598
ENSMUSG00000049493.13	Pls1	2072	0.478878	1.76e-08	2.89e-06
ENSMUSG00000043760.16	Pkhd1	607.599	0.478855	0.0472162	0.284453
ENSMUSG00000034617.6	Mtrr	349.99	0.478765	0.00251863	0.0393416
ENSMUSG00000006310.10	Zbtb32	59.192	0.478748	0.0694363	0.361652
ENSMUSG00000097333.7	Zfp87	294.324	0.478557	0.00379953	0.053158
ENSMUSG00000094870.7	Zfp131	760.409	0.478164	0.000434462	0.0104565
ENSMUSG00000022385.10	Gtse1	313.458	0.47797	0.0806335	0.393016
ENSMUSG00000032555.9	Topbp1	1845.86	0.47794	0.00205946	0.0341072
ENSMUSG00000009772.15	Nuak2	57.8658	0.477396	0.0844459	0.403502
ENSMUSG00000038903.13	Ccdc68	130.005	0.477031	0.0288238	0.209265
ENSMUSG00000054517.9	Trim65	212.759	0.476903	0.0587002	0.324593
ENSMUSG00000041957.15	Pkp2	948.939	0.476478	0.000897683	0.0183032
ENSMUSG00000034575.11	Papd7	708.731	0.47638	0.00352245	0.0503055
ENSMUSG00000023066.9	Rttn	352.378	0.476353	0.0186609	0.159008
ENSMUSG00000021636.14	Marveld2	856.43	0.47575	0.00315481	0.0466714
ENSMUSG00000097039.8	NA	186.304	0.47566	0.00409623	0.0557267
ENSMUSG00000002384.2	Bmp8b	614.755	0.475458	0.0329141	0.227781
ENSMUSG00000022881.14	Rfc4	354.103	0.475025	0.0050241	0.0645927
ENSMUSG00000030086.16	Chchd6	60.8571	0.47481	0.0821039	0.396548
ENSMUSG00000097242.1	NA	125.876	0.473838	0.0296584	0.213384
ENSMUSG00000073409.12	H2-Q6	191.104	0.473579	0.0890223	0.416102
ENSMUSG00000029363.14	Rfc5	297.952	0.47245	0.0357567	0.240737
ENSMUSG00000017716.15	Birc5	425.397	0.472178	0.0797583	0.390837
ENSMUSG00000021639.16	Gtf2h2	418.751	0.472047	0.000286295	0.00758015
ENSMUSG00000030465.18	Psd3	646.346	0.471936	0.0173456	0.151224
ENSMUSG00000019303.14	Psmc3ip	105.549	0.471874	0.0814671	0.395052
ENSMUSG00000024899.6	Papss2	1957.88	0.468102	0.000668722	0.0146683
ENSMUSG00000027496.15	Aurka	614.319	0.467627	0.0713542	0.367151
ENSMUSG00000004748.5	Mtfp1	79.0653	0.466544	0.0440586	0.273008
ENSMUSG00000029605.16	Oas1b	92.1914	0.466422	0.0254707	0.19348
ENSMUSG00000021671.8	Poc5	322.391	0.465018	0.00375984	0.0528267
ENSMUSG00000068587.9	Mgam	1696.55	0.464757	0.00366267	0.051859
ENSMUSG00000075266.4	Cenpw	103.551	0.464599	0.0806975	0.39312
ENSMUSG00000030499.9	Kctd15	102.897	0.464335	0.0864577	0.409099
ENSMUSG00000021983.15	Atp8a2	59.3971	0.464261	0.081037	0.394308
ENSMUSG00000074364.5	Ehd2	478.176	0.464254	0.0813318	0.395043
ENSMUSG00000047604.2	Frat2	363.817	0.464185	0.0298558	0.214497
ENSMUSG00000068184.6	Ndufaf2	165.537	0.463721	0.00645287	0.0775802
ENSMUSG00000049858.7	Suox	546.178	0.463468	0.0127059	0.124087
ENSMUSG00000023908.7	Pkmyt1	335.08	0.461379	0.0451808	0.277111
ENSMUSG00000038010.8	Ccdc138	119.364	0.461333	0.0197126	0.164057
ENSMUSG00000032487.8	Ptgs2	95.9659	0.461257	0.0957301	0.436103
ENSMUSG00000022755.4	Adgrg7	1070.99	0.461021	0.0967236	0.438791
ENSMUSG00000031626.16	Sorbs2	2336.64	0.460702	0.00123904	0.0234919
ENSMUSG00000059654.7	Reg1	55.8051	0.460061	0.0967494	0.438791
ENSMUSG00000051596.13	Otop1	1055.5	0.460056	0.0441678	0.273581
ENSMUSG00000021681.8	Aggf1	1077.05	0.460014	0.00125725	0.0237281
ENSMUSG00000028614.14	Ndc1	615.891	0.459971	0.0138527	0.130572
ENSMUSG00000027330.16	Cdc25b	1314.68	0.459709	0.0231385	0.181834
ENSMUSG00000028068.14	Iqgap3	1116.13	0.459558	0.100101	0.446622
ENSMUSG00000052949.14	Rnf157	875.384	0.459218	0.0356149	0.240078
ENSMUSG00000030555.15	Ttc23	338.294	0.458851	0.0166261	0.147281
ENSMUSG00000000948.16	Gm38393	387.343	0.458779	0.0490211	0.291102
ENSMUSG00000009647.13	Mcu	600.96	0.458074	0.00332299	0.0482931
ENSMUSG00000030978.9	Rrm1	1707.03	0.457542	0.0155945	0.142056
ENSMUSG00000045103.17	Dmd	357.51	0.457024	0.0721303	0.369042
ENSMUSG00000021710.10	Nln	750.718	0.456864	0.000231771	0.0064253
ENSMUSG00000025869.11	Nop16	511.447	0.456319	0.00095588	0.0190887
ENSMUSG00000056665.2	Them6	341.97	0.456238	0.0455473	0.27826
ENSMUSG00000078453.2	Abracl	153.95	0.455639	0.0170626	0.149706
ENSMUSG00000030231.10	Plekha5	1993.93	0.455296	0.000103352	0.00347916
ENSMUSG00000024074.7	Crim1	1127.59	0.454205	0.00206556	0.0341397
ENSMUSG00000046295.13	Ankle1	239.276	0.45407	0.0964098	0.43775
ENSMUSG00000094595.1	Fsbp	50.5938	0.454018	0.103157	0.453643
ENSMUSG00000059552.13	Trp53	211.247	0.453966	0.0039406	0.054348
ENSMUSG00000021326.11	Trim27	899.706	0.453962	0.00513646	0.065679
ENSMUSG00000002475.15	Abhd3	106.196	0.453842	0.0239517	0.186097
ENSMUSG00000041420.18	Meis3	156.309	0.453728	0.0229661	0.181256
ENSMUSG00000069662.5	Marcks	1155.51	0.453531	0.00222084	0.0356697
ENSMUSG00000024998.17	Plce1	680.957	0.453109	0.0174392	0.151879
ENSMUSG00000057614.6	Gnai1	283.898	0.452781	0.0942414	0.431251
ENSMUSG00000029366.10	Dck	688.263	0.452398	0.0112324	0.113598
ENSMUSG00000028896.13	Rcc1	630.008	0.45233	0.0190797	0.160899
ENSMUSG00000070287.3	Slc35g2	119.103	0.451956	0.0185589	0.158616
ENSMUSG00000028312.19	Smc2	1548.22	0.451892	0.0646437	0.344189
ENSMUSG00000085183.1	NA	190.405	0.450533	0.0500791	0.294914
ENSMUSG00000039231.18	Suv39h1	631.651	0.450294	0.0138358	0.130487
ENSMUSG00000040033.15	Stat2	786.303	0.449245	2.91e-05	0.00126433
ENSMUSG00000021464.14	Ror2	726.002	0.44924	0.000526233	0.0122429
ENSMUSG00000026669.14	Mcm10	599.143	0.449133	0.000276428	0.00736619
ENSMUSG00000026961.6	Lrrc26	79.2688	0.448772	0.108939	0.466737
ENSMUSG00000026785.14	Pkn3	403.301	0.44861	0.0171968	0.150522
ENSMUSG00000016018.3	Skiv2l2	1360.28	0.447738	0.000624328	0.0139166
ENSMUSG00000039055.4	Eme1	130.105	0.446709	0.0963308	0.43775
ENSMUSG00000042426.5	Dhx29	388.283	0.446598	0.0287126	0.209096
ENSMUSG00000021514.17	Zfp369	277.502	0.446449	0.0183188	0.157286
ENSMUSG00000057649.5	Brd9	558.005	0.446191	0.0020341	0.0337551
ENSMUSG00000046229.9	Scand1	148.014	0.44602	0.0339445	0.232196
ENSMUSG00000079553.10	Kifc1	393.201	0.445938	0.100535	0.447831
ENSMUSG00000022582.4	Ly6g	163.304	0.445935	0.110971	0.472602
ENSMUSG00000021703.8	Serinc5	1652.53	0.445813	0.000279024	0.00741144
ENSMUSG00000021215.14	Net1	1631.63	0.445755	0.00295611	0.0446939
ENSMUSG00000036492.12	Rnf39	96.7241	0.445465	0.101616	0.450219
ENSMUSG00000026873.9	Phf19	159.527	0.445386	0.104115	0.456262
ENSMUSG00000060487.5	Samd5	810.619	0.445205	0.0721263	0.369042
ENSMUSG00000040084.9	Bub1b	1388.41	0.444762	0.0470672	0.283658
ENSMUSG00000042275.8	Pelo	277.475	0.444287	0.0113339	0.114344
ENSMUSG00000061119.6	Prcp	207.341	0.444039	0.026458	0.198465
ENSMUSG00000033031.13	C330027C09Rik	915.16	0.443777	0.0784891	0.387744
ENSMUSG00000022769.7	Sdf2l1	173.64	0.443641	0.0522415	0.302359
ENSMUSG00000036777.7	Anln	1608.34	0.442619	0.114464	0.479068
ENSMUSG00000033991.8	Ttc37	850.595	0.44259	0.000205212	0.0058869
ENSMUSG00000024548.11	Setbp1	191.474	0.442508	0.0803344	0.392808
ENSMUSG00000037337.10	Map4k1	78.0305	0.442304	0.0519198	0.301449
ENSMUSG00000026355.11	Mcm6	1805.2	0.442224	0.0259479	0.195617
ENSMUSG00000023206.16	Il15ra	90.5697	0.442043	0.0667874	0.352487
ENSMUSG00000024660.8	Incenp	1142.23	0.442013	0.029086	0.210519
ENSMUSG00000040034.15	Nup43	315.393	0.441954	0.00347	0.0497531
ENSMUSG00000047221.5	Fam185a	772.494	0.44176	0.00453008	0.0599228
ENSMUSG00000030505.16	Prmt3	311.471	0.441127	0.0481275	0.288258
ENSMUSG00000025747.12	Tyms	314.721	0.440322	0.0340244	0.232395
ENSMUSG00000025574.13	Tk1	389.787	0.440181	0.0402169	0.257694
ENSMUSG00000027313.3	Chac1	66.3328	0.440061	0.0834664	0.400925
ENSMUSG00000074896.3	Ifit3	61.6996	0.439997	0.106643	0.461441
ENSMUSG00000038267.14	Slc22a23	1474.88	0.439162	0.000936498	0.0187698
ENSMUSG00000021311.8	Mtr	236.763	0.438478	0.0399694	0.257157
ENSMUSG00000020151.16	Ptprr	794.023	0.438383	0.0394034	0.255626
ENSMUSG00000033960.5	9430020K01Rik	176.815	0.438057	0.0706017	0.365414
ENSMUSG00000015653.13	Steap2	1212.4	0.438033	0.00933444	0.101631
ENSMUSG00000084301.1	NA	86.5081	0.43799	0.104323	0.456448
ENSMUSG00000034906.15	Ncaph	1107.7	0.437803	0.0265936	0.19912
ENSMUSG00000026175.12	Vil1	1727.87	0.437654	0.0163301	0.145605
ENSMUSG00000075602.10	Ly6a	732.281	0.437544	0.00478474	0.0623907
ENSMUSG00000021606.7	Ndufs6	189.226	0.437368	0.00504966	0.0648204
ENSMUSG00000028706.14	Nsun4	326.801	0.437016	0.00752678	0.0870036
ENSMUSG00000030303.15	Far2	120.094	0.437007	0.104314	0.456448
ENSMUSG00000032641.17	Gpr19	171.122	0.436154	0.013396	0.127874
ENSMUSG00000021585.8	Cast	1472.02	0.43606	0.000621221	0.0138849
ENSMUSG00000031609.3	Sap30	483.52	0.435886	0.000729324	0.0157877
ENSMUSG00000033147.16	Slc22a15	194.621	0.434584	0.0483223	0.288587
ENSMUSG00000034320.14	Slc26a2	879.519	0.434145	0.0207459	0.169997
ENSMUSG00000089960.1	Ugt1a1	71.4984	0.434065	0.117858	0.48626
ENSMUSG00000055413.12	H2-Q5	60.7881	0.43386	0.122001	0.493382
ENSMUSG00000047205.12	Dusp18	121.082	0.433714	0.0788868	0.389033
ENSMUSG00000031093.14	Dock11	1911.75	0.433293	0.0160659	0.144334
ENSMUSG00000029153.11	Ociad2	1173.35	0.432978	0.0160741	0.144334
ENSMUSG00000028221.3	Tmem55a	598.307	0.432956	0.00132015	0.0246056
ENSMUSG00000032860.4	P2ry2	380.453	0.432832	0.0742053	0.376157
ENSMUSG00000021666.16	Gfm2	636.833	0.432368	0.000313698	0.00813592
ENSMUSG00000021607.8	Mrpl36	325.771	0.432226	0.0186564	0.159008
ENSMUSG00000039208.15	Metrnl	284.062	0.431707	0.00131508	0.024541
ENSMUSG00000041491.7	Cep78	159.704	0.431611	0.0729399	0.372021
ENSMUSG00000031112.10	Stk26	251.569	0.431387	0.0533341	0.306309
ENSMUSG00000055415.7	Atp10b	1398.19	0.431316	0.0318504	0.223049
ENSMUSG00000098090.7	NA	151.67	0.431234	0.122577	0.494208
ENSMUSG00000026360.9	Rgs2	297.107	0.430687	0.0337533	0.231887
ENSMUSG00000057137.9	Tmem140	66.1776	0.430316	0.0850624	0.404586
ENSMUSG00000021713.8	Ppwd1	378.784	0.429692	0.0342555	0.233393
ENSMUSG00000021115.14	Vrk1	521.866	0.429609	0.0148678	0.137856
ENSMUSG00000039942.15	Ptger4	716.323	0.429517	0.0018314	0.0314349
ENSMUSG00000070304.11	Scn2b	1279.4	0.429459	0.00821833	0.0927017
ENSMUSG00000038295.14	Atg9b	1132.01	0.429212	0.126373	0.501932
ENSMUSG00000024409.8	Psors1c2	58.5136	0.428559	0.115506	0.48159
ENSMUSG00000039236.18	Isg20	359.833	0.4279	0.00615327	0.0748512
ENSMUSG00000029188.14	Slc34a2	186.467	0.427199	0.101763	0.450504
ENSMUSG00000029822.15	Osbpl3	1093.81	0.426932	0.0155067	0.141786
ENSMUSG00000021754.17	Map3k1	2543.07	0.426703	0.00306473	0.0457773
ENSMUSG00000028378.6	Ptgr1	702.901	0.426434	0.00196708	0.0330417
ENSMUSG00000050931.7	Sgms2	831.218	0.426205	0.00886843	0.0977186
ENSMUSG00000005667.8	Mthfd2	399.65	0.426195	0.0222356	0.178306
ENSMUSG00000028179.12	Cth	185.613	0.425848	0.0584296	0.32353
ENSMUSG00000034422.14	Parp14	1783.06	0.425701	9.66e-05	0.00333678
ENSMUSG00000021466.11	Ptch1	1591.02	0.42559	0.0043176	0.0579486
ENSMUSG00000023032.12	Slc4a8	107.11	0.424701	0.106434	0.461379
ENSMUSG00000031788.13	Kifc3	1317.52	0.424507	0.00170374	0.0299465
ENSMUSG00000096001.2	2610528A11Rik	278.563	0.424184	0.105385	0.45878
ENSMUSG00000032589.14	Bsn	624.667	0.423782	0.0410633	0.260515
ENSMUSG00000042677.7	Zc3h12a	304.866	0.423524	0.00914851	0.10018
ENSMUSG00000032596.14	Uba7	909.079	0.423429	0.00626896	0.0758913
ENSMUSG00000039682.12	Lap3	1067.67	0.423409	3.06e-05	0.00132379
ENSMUSG00000022360.7	Atad2	1304.97	0.423386	0.0435575	0.271432
ENSMUSG00000005233.16	Spc25	396.489	0.422699	0.10578	0.459893
ENSMUSG00000017778.14	Cox7c	117.295	0.422519	0.0589941	0.325345
ENSMUSG00000046623.8	Gjb4	194.714	0.422197	0.12656	0.501951
ENSMUSG00000025868.6	Higd2a	483.265	0.422142	0.000693556	0.0151126
ENSMUSG00000107126.1	NA	70.9991	0.422128	0.120649	0.491213
ENSMUSG00000032232.14	Cgnl1	3430.05	0.421914	0.0317109	0.222666
ENSMUSG00000074794.9	Arrdc3	745.614	0.419772	0.0188473	0.159839
ENSMUSG00000063838.6	Cdc42ep5	363.715	0.419717	0.00952944	0.102603
ENSMUSG00000026784.14	Pdss1	83.5086	0.419578	0.0759712	0.381591
ENSMUSG00000026088.15	Mitd1	349.767	0.419495	0.00470061	0.061652
ENSMUSG00000051235.8	Gen1	111.755	0.419306	0.112989	0.477101
ENSMUSG00000021662.9	Arhgef28	1518.66	0.419263	0.0191428	0.161325
ENSMUSG00000057092.12	Fxyd3	291.229	0.418898	0.00763967	0.0879388
ENSMUSG00000052727.5	Map1b	151.138	0.4186	0.11878	0.487991
ENSMUSG00000021519.10	Mterf3	387.4	0.418301	0.00310239	0.0461027
ENSMUSG00000027227.7	Sord	530.816	0.418289	0.0267622	0.199838
ENSMUSG00000054321.6	Taf4b	192.921	0.41815	0.0767368	0.383559
ENSMUSG00000033906.5	Zdhhc15	832.376	0.418122	0.0280771	0.206282
ENSMUSG00000085156.7	NA	157.966	0.418026	0.0538912	0.308055
ENSMUSG00000028128.13	F3	813.813	0.417669	0.045366	0.277425
ENSMUSG00000044966.4	Fbxo48	50.8068	0.417667	0.13545	0.517786
ENSMUSG00000013483.14	Card14	324.111	0.41729	0.0587555	0.324681
ENSMUSG00000051517.14	Arhgef39	598.651	0.416982	0.110016	0.469523
ENSMUSG00000020173.17	Cobl	1917.94	0.416893	0.000902667	0.0183149
ENSMUSG00000046818.7	Ddit4l	106.035	0.416382	0.0309552	0.219899
ENSMUSG00000031669.9	Gins3	148.038	0.416179	0.0524595	0.303302
ENSMUSG00000071180.4	Smim15	800.874	0.416142	0.00805561	0.0913163
ENSMUSG00000032897.17	Nfyc	239.951	0.416036	0.00936912	0.101702
ENSMUSG00000021731.9	Mrps30	356.733	0.415958	0.0104623	0.109149
ENSMUSG00000049517.7	Rps23	60.2726	0.41562	0.0715814	0.367487
ENSMUSG00000021556.11	Golm1	2049.69	0.414882	0.00732616	0.0853426
ENSMUSG00000021481.11	Zfp346	436.103	0.414433	0.00458815	0.0605453
ENSMUSG00000047534.16	Mis18bp1	679.653	0.414335	0.115497	0.48159
ENSMUSG00000047735.14	Samd9l	1965.6	0.413919	0.0186887	0.159008
ENSMUSG00000027752.15	Exosc8	473.385	0.413863	0.000658378	0.0145576
ENSMUSG00000034226.7	Rhov	912.802	0.413664	0.0170263	0.149626
ENSMUSG00000028121.8	Bcar3	501.385	0.413399	0.0507314	0.297587
ENSMUSG00000015536.14	Mocs2	650.544	0.413294	0.0047985	0.0625208
ENSMUSG00000003526.11	Prodh	360.805	0.412728	0.0820678	0.396548
ENSMUSG00000030431.8	Tmem238	148.745	0.412603	0.101547	0.450189
ENSMUSG00000021461.16	Fancc	345.217	0.412556	0.0366557	0.245288
ENSMUSG00000029414.11	Kntc1	719.679	0.412326	0.139949	0.526522
ENSMUSG00000021501.4	Caml	416.411	0.411487	0.0155672	0.142056
ENSMUSG00000035762.10	Tmem161b	468.768	0.410987	0.0044033	0.0586996
ENSMUSG00000023940.14	Sgol1	486.967	0.410537	0.123421	0.496164
ENSMUSG00000026094.14	Stk17b	1134.48	0.410356	0.0158555	0.14315
ENSMUSG00000025758.10	Plk4	486.997	0.409654	0.0760756	0.381651
ENSMUSG00000067203.7	NA	131.915	0.409316	0.112818	0.476919
ENSMUSG00000021458.16	2010111I01Rik	600.754	0.408376	0.0148465	0.13781
ENSMUSG00000035769.8	Xylb	127.207	0.407582	0.0956851	0.436103
ENSMUSG00000027353.14	Mcm8	223.058	0.407023	0.108991	0.466737
ENSMUSG00000004929.12	Thop1	761.346	0.40682	0.0268312	0.20001
ENSMUSG00000044976.16	Wdr72	219.193	0.406474	0.0517709	0.300902
ENSMUSG00000021629.9	Slc30a5	984.96	0.406447	0.000773664	0.0164666
ENSMUSG00000028780.13	Sema3c	2672.4	0.406334	0.041836	0.264059
ENSMUSG00000027692.16	Tnik	506.185	0.405654	0.0492445	0.291666
ENSMUSG00000033213.16	AA467197	208.444	0.405499	0.114377	0.479068
ENSMUSG00000027342.14	Pcna	363.73	0.405498	0.00553506	0.0692723
ENSMUSG00000039676.3	Capsl	51.4618	0.404781	0.100587	0.447945
ENSMUSG00000039958.17	Mettl20	649.024	0.40453	0.000459976	0.0109469
ENSMUSG00000021661.15	Ankra2	499.896	0.404275	0.00517685	0.0659908
ENSMUSG00000048534.6	Amica1	271.703	0.404087	0.0712756	0.367059
ENSMUSG00000033721.16	Vav3	69.2778	0.404054	0.145483	0.536476
ENSMUSG00000024981.5	Acsl5	1702.7	0.403634	0.00143508	0.0263018
ENSMUSG00000048280.17	Zfp738	175.639	0.403449	0.0980678	0.44258
ENSMUSG00000019992.7	Mtfr2	125.463	0.403295	0.146685	0.539361
ENSMUSG00000018509.8	Cenpv	304.012	0.402661	0.00518879	0.066092
ENSMUSG00000057554.13	Lgals8	714.519	0.402653	0.00802613	0.0911784
ENSMUSG00000020042.15	Btbd11	152.351	0.402557	0.114287	0.479068
ENSMUSG00000031629.13	Cenpu	109.19	0.402062	0.129103	0.506074
ENSMUSG00000097296.1	NA	51.5163	0.401409	0.0903695	0.420492
ENSMUSG00000021504.14	B4galt7	357.527	0.401102	0.00978485	0.104738
ENSMUSG00000027790.14	Sis	55.5725	0.400492	0.117621	0.485845
ENSMUSG00000042286.13	Stab1	103.305	0.400157	0.139221	0.525689
ENSMUSG00000032254.9	Kif23	1113.94	0.400126	0.154032	0.551501
ENSMUSG00000070565.11	Rasal2	931.175	0.399665	0.0103103	0.108284
ENSMUSG00000049191.12	Rgag4	60.8204	0.399566	0.125725	0.50008
ENSMUSG00000026103.14	Gls	3375.77	0.399235	0.00102198	0.0200057
ENSMUSG00000031897.8	Psmb10	298.931	0.399204	0.0453648	0.277425
ENSMUSG00000021621.15	Zcchc9	605.497	0.398243	0.010761	0.110817
ENSMUSG00000046410.9	Kcnk6	72.4848	0.398023	0.127834	0.503973
ENSMUSG00000005672.12	Kit	117.407	0.397974	0.102943	0.453294
ENSMUSG00000037628.9	Cdkn3	158.013	0.3978	0.154875	0.55299
ENSMUSG00000026039.9	Sgol2a	325.433	0.397571	0.146964	0.53944
ENSMUSG00000083902.2	NA	231.337	0.397555	0.0247684	0.190202
ENSMUSG00000025287.15	Acot9	272.193	0.397419	0.0124481	0.122221
ENSMUSG00000019942.12	Cdk1	972.37	0.397393	0.0371298	0.246958
ENSMUSG00000029516.19	Cit	811.922	0.397205	0.15712	0.556995
ENSMUSG00000059336.14	Slc14a1	231.927	0.397053	0.130435	0.508753
ENSMUSG00000028066.15	Pmf1	390.409	0.39637	0.053795	0.30768
ENSMUSG00000082361.6	Btc	607.518	0.396065	0.0446468	0.275
ENSMUSG00000024525.6	Impa2	289.045	0.395456	0.0431874	0.269737
ENSMUSG00000028217.11	Cdh17	2565.53	0.395382	0.0163392	0.145605
ENSMUSG00000048706.3	Lurap1l	1870.17	0.395353	8.68e-05	0.00306954
ENSMUSG00000048489.12	8430408G22Rik	929.381	0.395138	0.0491324	0.29142
ENSMUSG00000027379.13	Bub1	804.808	0.394724	0.158935	0.559967
ENSMUSG00000017756.8	Slc12a7	1832.93	0.394572	0.0221417	0.177727
ENSMUSG00000060961.14	Slc4a4	2813.72	0.394105	0.00306336	0.0457773
ENSMUSG00000037851.13	Iars	1197.35	0.393897	0.0084873	0.0947213
ENSMUSG00000058392.12	Rrp1b	863.068	0.39362	0.0475613	0.285905
ENSMUSG00000040749.11	Siah1b	103.486	0.393263	0.110621	0.471377
ENSMUSG00000004018.9	Fancl	155.188	0.393197	0.0459397	0.279622
ENSMUSG00000031355.16	Arhgap6	541.85	0.39242	0.0209824	0.171246
ENSMUSG00000035105.5	Egln3	1742.63	0.392337	0.000837528	0.0173121
ENSMUSG00000047230.6	Cldn2	1467.71	0.392178	0.0919976	0.425189
ENSMUSG00000027514.14	Zbp1	189.917	0.391416	0.103373	0.454217
ENSMUSG00000041605.16	5730559C18Rik	586.379	0.391055	0.0804442	0.392931
ENSMUSG00000030423.7	Pop4	431.21	0.390816	0.00644158	0.077501
ENSMUSG00000056121.15	Fez2	261.293	0.390227	0.0131584	0.126557
ENSMUSG00000097195.8	NA	475.469	0.390209	0.0307479	0.218918
ENSMUSG00000059791.14	Nrm	319.173	0.389902	0.0410881	0.260572
ENSMUSG00000028560.11	Usp1	628.303	0.388635	0.041612	0.263186
ENSMUSG00000046949.15	Nqo2	129.427	0.388334	0.144855	0.535124
ENSMUSG00000027324.1	Rpusd2	167.273	0.38819	0.0620371	0.336502
ENSMUSG00000024165.8	Hn1l	1060.1	0.387851	0.000453435	0.0108712
ENSMUSG00000028678.13	Kif2c	623.174	0.387844	0.1671	0.573396
ENSMUSG00000040618.6	Pck2	1125.64	0.38752	0.0355046	0.239627
ENSMUSG00000001436.15	Slc19a1	408.348	0.387519	0.0249351	0.190784
ENSMUSG00000053310.11	Nrgn	98.1069	0.387452	0.166786	0.572844
ENSMUSG00000036667.14	Tcaf1	1271.74	0.387312	0.0161949	0.144867
ENSMUSG00000032621.7	Srek1	969.068	0.386705	0.016409	0.14607
ENSMUSG00000033308.16	Dpyd	128.388	0.386554	0.167159	0.57348
ENSMUSG00000022146.12	Osmr	996.461	0.386468	0.0442275	0.273746
ENSMUSG00000021958.4	Pinx1	188.15	0.386421	0.0567147	0.318309
ENSMUSG00000021213.11	Akr1c13	377.009	0.386241	0.0327025	0.226937
ENSMUSG00000045730.3	Adrb2	182.149	0.385955	0.0779761	0.386455
ENSMUSG00000024989.14	Cep55	837.178	0.385855	0.168594	0.576003
ENSMUSG00000045136.5	Tubb2b	286.535	0.38565	0.11694	0.484458
ENSMUSG00000001403.13	Ube2c	561.448	0.3856	0.125697	0.50008
ENSMUSG00000020460.15	Rps27a	199.535	0.385232	0.0714806	0.367312
ENSMUSG00000050854.9	Tmem125	187.957	0.38521	0.165422	0.570544
ENSMUSG00000020914.17	Top2a	4470.86	0.384929	0.0804403	0.392931
ENSMUSG00000053604.5	Rpia	657.936	0.384398	0.0113171	0.114244
ENSMUSG00000022351.14	Sqle	1147.04	0.384012	0.00122948	0.0233644
ENSMUSG00000011267.7	Zfp296	67.6547	0.383585	0.108826	0.466497
ENSMUSG00000038879.7	Nipal2	300.392	0.383493	0.106966	0.462263
ENSMUSG00000017950.16	Hnf4a	1956.77	0.383078	0.0376033	0.248703
ENSMUSG00000034192.5	Lsm3	216.176	0.382764	0.0248286	0.190487
ENSMUSG00000047789.4	Slc38a9	386.053	0.382673	0.0286796	0.209096
ENSMUSG00000084220.1	NA	61.5102	0.381954	0.172163	0.582789
ENSMUSG00000073434.11	Wdr90	466.159	0.3812	0.0575284	0.320585
ENSMUSG00000036941.2	Elac1	255.559	0.38094	0.0156341	0.142056
ENSMUSG00000021483.7	Cdk20	111.076	0.380885	0.0751056	0.378742
ENSMUSG00000048439.15	Nupl2	131.754	0.380793	0.125813	0.500311
ENSMUSG00000038372.13	Gmds	609.13	0.380726	0.00063515	0.0141387
ENSMUSG00000029177.9	Cenpa	1135.34	0.380665	0.134496	0.516292
ENSMUSG00000101335.1	NA	61.22	0.380409	0.113427	0.477777
ENSMUSG00000075284.10	Wipf1	326.416	0.380407	0.161502	0.564412
ENSMUSG00000001504.10	Irx2	160.463	0.380275	0.0688538	0.3595
ENSMUSG00000049932.3	H2afx	555.49	0.380259	0.0243031	0.187853
ENSMUSG00000027371.10	Fahd2a	219.388	0.379651	0.0714145	0.367312
ENSMUSG00000054951.2	9130008F23Rik	926.698	0.379508	0.00082133	0.0171059
ENSMUSG00000032114.8	Slc37a4	510.681	0.378469	0.0189973	0.160533
ENSMUSG00000048699.4	Krt90	717.094	0.378085	0.0983897	0.442706
ENSMUSG00000037509.18	Arhgef4	98.2458	0.377834	0.115023	0.480086
ENSMUSG00000021048.6	Mthfd1	1006.47	0.377628	0.0469705	0.283309
ENSMUSG00000039043.5	Arpin	559.139	0.37748	0.0148546	0.13781
ENSMUSG00000036931.14	Nfkbid	74.0321	0.377409	0.148325	0.541062
ENSMUSG00000029484.12	Anxa3	1413.54	0.377394	0.0668427	0.352597
ENSMUSG00000037816.10	Fbxw17	184.187	0.377295	0.0466028	0.281993
ENSMUSG00000056531.11	Ccdc18	414.681	0.377093	0.161057	0.563923
ENSMUSG00000027715.9	Ccna2	1122.33	0.376769	0.179642	0.594064
ENSMUSG00000031381.15	Piga	507.535	0.376668	0.0155756	0.142056
ENSMUSG00000048001.7	Hes5	191.275	0.376302	0.174448	0.586172
ENSMUSG00000027356.8	Fermt1	3033.29	0.376004	0.00676909	0.0799829
ENSMUSG00000029406.15	Pitpnm2	254.448	0.375652	0.138376	0.524475
ENSMUSG00000096917.1	NA	102.407	0.375386	0.0994773	0.444828
ENSMUSG00000056737.14	Capg	229.812	0.37508	0.14207	0.529952
ENSMUSG00000000308.14	Ckmt1	802.811	0.374963	0.017621	0.152744
ENSMUSG00000028063.15	Lmna	1510.34	0.374773	0.00170475	0.0299465
ENSMUSG00000029869.7	Ephb6	361.155	0.374649	0.122146	0.493494
ENSMUSG00000021811.6	Dnajc9	374.529	0.374065	0.091319	0.422764
ENSMUSG00000024269.11	Tpgs2	244.641	0.373622	0.144187	0.533384
ENSMUSG00000023959.8	Clic5	147.509	0.373499	0.123953	0.497109
ENSMUSG00000041238.15	Rbbp8	853.21	0.373396	0.000919518	0.0185259
ENSMUSG00000059810.18	Rgs3	596.464	0.373095	0.00626565	0.0758913
ENSMUSG00000030281.16	Il17rc	677.196	0.373053	0.0235652	0.184048
ENSMUSG00000025786.15	Zdhhc3	1565.66	0.372888	0.00853769	0.0951344
ENSMUSG00000015880.13	Ncapg	771.207	0.372731	0.18273	0.598873
ENSMUSG00000022505.8	Emp2	2541.46	0.372611	0.000157619	0.00476178
ENSMUSG00000027134.4	Lpcat4	1012.27	0.372295	0.00309211	0.0460456
ENSMUSG00000108350.1	NA	113.322	0.372117	0.1122	0.47568
ENSMUSG00000049658.13	Bdp1	1452.65	0.37176	0.00847463	0.0947081
ENSMUSG00000078700.10	NA	224.496	0.37147	0.162434	0.565859
ENSMUSG00000028212.16	Ccne2	121.016	0.371361	0.128978	0.506074
ENSMUSG00000034152.5	Exoc3	871.938	0.370943	0.00630919	0.0762233
ENSMUSG00000006782.16	Cnp	597.022	0.370865	0.062264	0.337289
ENSMUSG00000010080.15	Epn3	626.205	0.369818	0.0785987	0.388053
ENSMUSG00000031256.11	Cstf2	1420.03	0.368513	0.00119806	0.0228514
ENSMUSG00000073598.3	1700066B19Rik	492.336	0.368512	0.114515	0.479068
ENSMUSG00000026946.9	Nmi	190.252	0.36849	0.0780174	0.386455
ENSMUSG00000024795.10	Kif20b	1183.87	0.367999	0.189918	0.608645
ENSMUSG00000038943.16	Prc1	1265.78	0.367926	0.12789	0.504073
ENSMUSG00000033446.7	Lpar6	566.709	0.367813	0.0520965	0.301838
ENSMUSG00000058656.12	Samd12	156.452	0.367705	0.0805487	0.393016
ENSMUSG00000040195.11	Tmem194	597.06	0.367532	0.0773473	0.384835
ENSMUSG00000007833.13	Aldh16a1	641.525	0.367423	0.0206474	0.169472
ENSMUSG00000032577.16	Mapkapk3	957.332	0.367188	0.00326481	0.0478269
ENSMUSG00000016239.11	Lonrf3	102.655	0.366866	0.191319	0.610525
ENSMUSG00000022070.6	Bora	771.482	0.366358	0.0230445	0.181355
ENSMUSG00000034349.14	Smc4	2273.1	0.365867	0.0588089	0.324758
ENSMUSG00000021549.13	Rasa1	1249.81	0.365587	0.0171737	0.150441
ENSMUSG00000038776.13	Ephx1	745.709	0.3655	0.00272658	0.0418761
ENSMUSG00000035232.8	Pdk3	312.244	0.365426	0.0336542	0.231592
ENSMUSG00000022663.3	Atg3	569.726	0.365372	0.0194731	0.16272
ENSMUSG00000032719.4	Sbspon	411.074	0.365337	0.0883863	0.414656
ENSMUSG00000021668.14	Polk	452.088	0.365279	0.0857759	0.406675
ENSMUSG00000038379.15	Ttk	488.933	0.364573	0.191278	0.610525
ENSMUSG00000001151.9	Pcnt	972.096	0.364225	0.0286461	0.209096
ENSMUSG00000021715.12	Cwc27	302.796	0.364214	0.0345815	0.235322
ENSMUSG00000083907.2	NA	100.56	0.364151	0.140651	0.527653
ENSMUSG00000029816.10	Gpnmb	76.0391	0.364042	0.174576	0.586365
ENSMUSG00000021711.16	Trappc13	1030.85	0.36403	0.0129082	0.125207
ENSMUSG00000050555.9	Hyls1	247.107	0.363601	0.146022	0.537881
ENSMUSG00000037325.10	Bbs7	88.9859	0.36345	0.136886	0.52062
ENSMUSG00000015217.11	Hmgb3	120.703	0.362662	0.0989946	0.443969
ENSMUSG00000026417.13	Pigr	703.678	0.362107	0.189905	0.608645
ENSMUSG00000037820.15	Tgm2	1694.56	0.361903	0.00227627	0.0363546
ENSMUSG00000041219.14	Arhgap11a	1269.6	0.361702	0.116755	0.484251
ENSMUSG00000050244.8	Heatr1	679.063	0.361148	0.0703394	0.364973
ENSMUSG00000025507.13	Pidd1	176.713	0.360968	0.151691	0.547269
ENSMUSG00000040187.15	Arntl2	439.708	0.360851	0.0235547	0.184048
ENSMUSG00000021493.15	Pdlim7	1080.29	0.360494	0.00343613	0.0495446
ENSMUSG00000019779.14	Frk	1244.4	0.36033	0.000777775	0.0165114
ENSMUSG00000033356.3	Pus7l	135.393	0.360254	0.127777	0.50387
ENSMUSG00000030867.7	Plk1	545.843	0.359345	0.15444	0.55236
ENSMUSG00000006850.7	Tmco6	437.583	0.359252	0.00669529	0.0793953
ENSMUSG00000020407.13	Upp1	112.936	0.359104	0.145001	0.535248
ENSMUSG00000096472.1	Cdkn2d	363.912	0.35855	0.101917	0.450946
ENSMUSG00000041685.15	Fcho2	1671.28	0.358534	0.00371517	0.0523775
ENSMUSG00000021548.10	Ccnh	467.691	0.358375	0.04039	0.257933
ENSMUSG00000066026.14	Dhrs3	642.266	0.358174	0.014714	0.136814
ENSMUSG00000071291.10	Zfp58	82.0646	0.358047	0.102267	0.451663
ENSMUSG00000040829.14	Zmynd15	65.8252	0.357617	0.202815	0.628603
ENSMUSG00000049608.8	Gpr55	90.4628	0.357537	0.20203	0.62724
ENSMUSG00000029343.17	Crybb1	69.288	0.357518	0.198687	0.623069
ENSMUSG00000038415.9	Foxq1	711.302	0.357467	0.0254767	0.19348
ENSMUSG00000031097.14	Tnni2	69.4944	0.357157	0.202032	0.62724
ENSMUSG00000020451.17	Limk2	1859	0.356937	0.00753406	0.0870269
ENSMUSG00000047641.7	Krt87	81.6919	0.356892	0.156276	0.556035
ENSMUSG00000027793.6	Ccna1	51.4116	0.356525	0.178949	0.59308
ENSMUSG00000026343.6	Gpr39	165.535	0.356452	0.0669116	0.352848
ENSMUSG00000020707.6	Rnf135	147.819	0.356219	0.143985	0.533185
ENSMUSG00000049313.8	Sorl1	2016.95	0.355829	0.00157018	0.0280607
ENSMUSG00000047565.4	Acot10	188.95	0.35581	0.0497869	0.293613
ENSMUSG00000021500.15	Ddx46	1993.05	0.355775	0.003137	0.0465399
ENSMUSG00000039747.11	Orai2	164.899	0.355591	0.142547	0.530851
ENSMUSG00000015672.3	Mrpl32	272.888	0.355395	0.063754	0.341657
ENSMUSG00000028521.17	Slc35d1	386.338	0.354883	0.00582802	0.0716877
ENSMUSG00000021510.10	Zfp729a	275.427	0.354663	0.0619562	0.336173
ENSMUSG00000004085.14	Zak	1214.32	0.354636	0.0108969	0.111781
ENSMUSG00000021913.7	Ogdhl	323.118	0.354582	0.0812765	0.395024
ENSMUSG00000004099.15	Dnmt1	2331.14	0.354108	0.011445	0.115113
ENSMUSG00000021908.9	Gm6768	283.51	0.354074	0.0532108	0.305823
ENSMUSG00000059834.12	Sclt1	261.54	0.354042	0.0665429	0.351803
ENSMUSG00000025872.5	Thoc3	670.788	0.353942	0.0367715	0.245782
ENSMUSG00000041431.16	Ccnb1	297.94	0.352999	0.19422	0.615022
ENSMUSG00000038759.15	Nup205	1905.34	0.352953	0.000242137	0.00663463
ENSMUSG00000062075.13	Lmnb2	616.379	0.352925	0.081305	0.39503
ENSMUSG00000069089.7	Cdk7	845.711	0.352334	0.0353562	0.238948
ENSMUSG00000056394.17	Lig1	1382.92	0.352242	0.0224286	0.178984
ENSMUSG00000031351.15	Zfp185	286.897	0.352043	0.184006	0.599923
ENSMUSG00000044026.2	Slc35g1	1024.51	0.352041	0.00279304	0.0427376
ENSMUSG00000043445.6	Pgp	282.589	0.352001	0.0984371	0.442706
ENSMUSG00000022048.8	Dpysl2	194.389	0.35157	0.0442655	0.273775
ENSMUSG00000021175.15	Cdca7l	632.649	0.35089	0.0380433	0.250409
ENSMUSG00000030725.3	Lipt2	385.877	0.350781	0.0105985	0.109951
ENSMUSG00000010154.6	Spire2	410.58	0.350548	0.0412032	0.261202
ENSMUSG00000063450.14	Syne2	2662.67	0.350246	0.00884865	0.097631
ENSMUSG00000021610.7	Clptm1l	1213.09	0.350212	0.000551073	0.0126955
ENSMUSG00000027947.11	Il6ra	59.0373	0.350017	0.212113	0.645775
ENSMUSG00000015342.6	Xk	255.348	0.349848	0.0711864	0.366829
ENSMUSG00000062421.13	Arf2	516.838	0.34935	0.0296629	0.213384
ENSMUSG00000036944.5	Tmem71	305.24	0.349319	0.0394052	0.255626
ENSMUSG00000058351.10	Smim4	68.8212	0.34928	0.167243	0.573543
ENSMUSG00000024803.8	Ankrd1	1122.56	0.349168	0.0225051	0.179334
ENSMUSG00000028175.15	Depdc1a	109.937	0.348521	0.207324	0.637549
ENSMUSG00000024725.12	Ostf1	653.78	0.348399	0.00562205	0.0699364
ENSMUSG00000042272.17	Sestd1	2164.34	0.347885	0.000236478	0.00651202
ENSMUSG00000023505.13	Cdca3	677.168	0.347882	0.215338	0.65043
ENSMUSG00000030538.15	Cib1	538.712	0.347696	0.00856075	0.0952831
ENSMUSG00000000531.4	Grasp	360.201	0.34765	0.0660092	0.349317
ENSMUSG00000022120.3	Rnf219	374.755	0.347462	0.039578	0.255696
ENSMUSG00000055228.7	Zfp935	111.169	0.34683	0.128227	0.504798
ENSMUSG00000027699.19	Ect2	1408.22	0.346641	0.217022	0.653005
ENSMUSG00000032501.8	Trib1	1649.67	0.346281	0.0087959	0.0973094
ENSMUSG00000073077.6	Gm7173	76.4874	0.346247	0.214683	0.649881
ENSMUSG00000024776.17	Stambpl1	229.152	0.346165	0.0250468	0.191272
ENSMUSG00000017057.9	Il13ra1	914.722	0.345883	0.0152653	0.14072
ENSMUSG00000027469.16	Tpx2	1390.64	0.34578	0.218112	0.655033
ENSMUSG00000090863.1	A530084C06Rik	82.8309	0.345777	0.116051	0.482852
ENSMUSG00000073433.10	Arhgdig	100.024	0.345617	0.176381	0.589425
ENSMUSG00000010048.10	Ifrd2	481.543	0.345392	0.101417	0.450062
ENSMUSG00000020527.14	Myo19	395.358	0.345295	0.0869979	0.410478
ENSMUSG00000029228.15	Lnx1	326.808	0.345111	0.0161103	0.144502
ENSMUSG00000020785.17	Camkk1	103.68	0.344961	0.11684	0.484362
ENSMUSG00000022978.11	Mis18a	326.437	0.344919	0.0175866	0.152599
ENSMUSG00000025757.12	Hspa4l	1740.7	0.344605	0.00335193	0.0486281
ENSMUSG00000040631.7	Dok4	705.498	0.344266	0.0244664	0.188497
ENSMUSG00000009248.5	Ascl2	267.894	0.344007	0.182652	0.598809
ENSMUSG00000024118.13	1600002H07Rik	237.297	0.343765	0.0600117	0.329306
ENSMUSG00000042659.14	Arrdc4	1281.72	0.343729	0.00147203	0.0268004
ENSMUSG00000022026.6	Olfm4	268.484	0.343512	0.0987549	0.443483
ENSMUSG00000036768.5	Kif15	620.173	0.343455	0.220114	0.657512
ENSMUSG00000021725.8	Parp8	203.81	0.343313	0.154324	0.552197
ENSMUSG00000097819.1	NA	62.3611	0.343192	0.147712	0.540225
ENSMUSG00000032624.15	Eml4	2158.15	0.342853	0.000733522	0.0158206
ENSMUSG00000021196.13	Pfkp	2774.5	0.342528	0.0036714	0.0518936
ENSMUSG00000083820.1	NA	111.498	0.342491	0.0795562	0.390349
ENSMUSG00000023072.14	Cep89	607.919	0.342398	0.0546816	0.310597
ENSMUSG00000033618.6	Map3k13	571.701	0.342305	0.0158859	0.143268
ENSMUSG00000026096.14	Osgepl1	263.574	0.342082	0.025428	0.193334
ENSMUSG00000022241.5	Tars	906.474	0.341799	0.0280082	0.206014
ENSMUSG00000002458.13	Rgs19	264.777	0.340959	0.0552866	0.312697
ENSMUSG00000066456.14	Hmgn3	153.488	0.340591	0.180675	0.595816
ENSMUSG00000062175.13	Tgif2	54.0862	0.340424	0.153561	0.550487
ENSMUSG00000050335.16	Lgals3	1051.92	0.340344	0.0200328	0.166051
ENSMUSG00000025887.10	Casp12	206.75	0.340239	0.196528	0.619219
ENSMUSG00000026398.14	Nr5a2	95.625	0.340013	0.119611	0.489333
ENSMUSG00000044042.18	Fmn1	700.673	0.339977	0.0512466	0.299016
ENSMUSG00000028069.16	Gpatch4	240.548	0.339837	0.152193	0.547828
ENSMUSG00000024247.14	Pkdcc	264.081	0.33973	0.0935341	0.429931
ENSMUSG00000000402.2	Egfl6	100.163	0.339378	0.21502	0.650275
ENSMUSG00000074207.10	Adh1	57.2547	0.339168	0.216137	0.652128
ENSMUSG00000036376.2	Abt1	273.823	0.339151	0.0426736	0.26744
ENSMUSG00000024019.17	Cmtr1	81.0657	0.338875	0.113006	0.477101
ENSMUSG00000029203.16	Ube2k	1314.23	0.338734	0.011665	0.116549
ENSMUSG00000073542.2	Cep76	238.75	0.338581	0.090117	0.420028
ENSMUSG00000016495.12	Plgrkt	703.846	0.338344	0.0186754	0.159008
ENSMUSG00000034203.8	Chchd4	402.096	0.337924	0.0660724	0.349539
ENSMUSG00000021470.17	Ercc6l2	550.194	0.337853	0.0709062	0.366415
ENSMUSG00000041237.12	Pklr	644.058	0.337768	0.114471	0.479068
ENSMUSG00000039233.12	Tbce	445.271	0.337289	0.0760162	0.381647
ENSMUSG00000035692.6	Isg15	278.274	0.33713	0.0594443	0.326844
ENSMUSG00000029208.16	Guf1	741.984	0.336611	0.032231	0.22499
ENSMUSG00000016526.8	Dyrk3	668.746	0.336532	0.0357822	0.240753
ENSMUSG00000020937.14	Plcd3	1324.53	0.336462	0.0186915	0.159008
ENSMUSG00000022325.14	Pop1	286.876	0.336245	0.0869695	0.410478
ENSMUSG00000036327.18	Qsox2	479.725	0.335993	0.0797787	0.390837
ENSMUSG00000048772.15	Tmem53	176.938	0.335983	0.0463322	0.280871
ENSMUSG00000026688.5	Mgst3	197.168	0.335896	0.0317361	0.222666
ENSMUSG00000021359.15	Tfap2a	385.002	0.335759	0.187921	0.606386
ENSMUSG00000027610.17	Gss	1031.18	0.33572	0.000378416	0.00944322
ENSMUSG00000024833.14	Pola2	695.023	0.335678	0.0406598	0.259051
ENSMUSG00000020492.11	Ska2	431.961	0.335469	0.147333	0.539816
ENSMUSG00000057375.13	Yipf1	559.751	0.335018	0.0125431	0.122934
ENSMUSG00000074259.10	Gramd2	142.099	0.334873	0.0978466	0.441921
ENSMUSG00000048550.17	Thnsl1	743.221	0.33465	0.00145294	0.0265702
ENSMUSG00000032051.8	Fdx1	342.94	0.334561	0.0153294	0.141073
ENSMUSG00000078202.3	Nrarp	491.191	0.334088	0.0105731	0.109756
ENSMUSG00000041959.14	S100a10	679.724	0.333749	0.0287454	0.209096
ENSMUSG00000024891.5	Slc29a2	231.397	0.333461	0.135871	0.518909
ENSMUSG00000050628.6	Ubald2	131.106	0.332998	0.0713602	0.367151
ENSMUSG00000001627.11	Ifrd1	624.015	0.332885	0.0220429	0.177279
ENSMUSG00000006784.14	Ttc25	87.6922	0.332695	0.225808	0.665337
ENSMUSG00000011254.16	Thg1l	134.038	0.33268	0.142489	0.530851
ENSMUSG00000018900.7	Slc22a5	371.447	0.332589	0.0198795	0.165251
ENSMUSG00000030313.15	Dennd5b	375.862	0.332326	0.0408829	0.259782
ENSMUSG00000020275.9	Rel	603.446	0.332323	0.0724562	0.370479
ENSMUSG00000027297.14	Ltk	236.304	0.331846	0.0235949	0.184192
ENSMUSG00000048120.16	Entpd1	55.0752	0.331765	0.183588	0.59954
ENSMUSG00000041064.13	Pif1	359.885	0.331679	0.205342	0.633194
ENSMUSG00000061787.14	Rps17	64.51	0.331578	0.194133	0.615015
ENSMUSG00000032221.14	Mns1	114.072	0.331485	0.218133	0.655033
ENSMUSG00000021550.5	2210016F16Rik	223.658	0.331267	0.125065	0.499109
ENSMUSG00000030282.14	Cmas	1515.12	0.330906	0.00172627	0.030196
ENSMUSG00000096433.1	Gm4944	237.321	0.330845	0.0288022	0.2092
ENSMUSG00000003849.8	Nqo1	254.199	0.330764	0.23052	0.671926
ENSMUSG00000020911.14	Krt19	1772.44	0.33063	0.00650641	0.0778834
ENSMUSG00000009378.3	Slc16a12	708.087	0.330542	0.168181	0.575073
ENSMUSG00000031843.1	Mphosph6	261.829	0.329943	0.0380042	0.250327
ENSMUSG00000009828.15	Ick	607.699	0.329884	0.108251	0.464881
ENSMUSG00000038209.12	Itln1	701.424	0.329858	0.160001	0.561958
ENSMUSG00000006442.10	Srm	362.99	0.329778	0.119265	0.488521
ENSMUSG00000055560.7	Zfp459	76.4948	0.329606	0.16208	0.565345
ENSMUSG00000042500.11	Ago4	138.938	0.329532	0.190908	0.610298
ENSMUSG00000106734.3	NA	191.315	0.329323	0.189078	0.60727
ENSMUSG00000031853.4	BC021891	1203.88	0.32905	0.00433514	0.0580423
ENSMUSG00000020464.15	Pnpt1	965.578	0.328528	0.00155287	0.027842
ENSMUSG00000032047.5	Acat1	670.426	0.328524	0.0275392	0.20407
ENSMUSG00000032397.6	Tipin	386.315	0.328506	0.0854174	0.405689
ENSMUSG00000032508.8	Myd88	193.714	0.32834	0.108148	0.464801
ENSMUSG00000005718.7	Tfap4	446.596	0.328123	0.043065	0.26927
ENSMUSG00000100204.1	NA	178.988	0.327747	0.106476	0.461379
ENSMUSG00000048922.18	Cdca2	741.874	0.327397	0.234554	0.678285
ENSMUSG00000022748.7	Cmss1	109.59	0.327369	0.115634	0.481782
ENSMUSG00000033467.12	Crlf2	163.706	0.32679	0.0981564	0.442687
ENSMUSG00000019256.17	Ahr	2496.82	0.326661	0.0213591	0.173501
ENSMUSG00000031827.12	Cotl1	378.385	0.326286	0.124343	0.497614
ENSMUSG00000021420.12	Fars2	345.05	0.326178	0.0907871	0.421275
ENSMUSG00000027201.16	Myef2	340.261	0.325843	0.0761546	0.381815
ENSMUSG00000020544.14	Cox11	78.8806	0.325681	0.136301	0.519354
ENSMUSG00000021576.5	Pdcd6	901.499	0.325557	0.0085786	0.0954044
ENSMUSG00000026709.10	Dars2	581.742	0.32553	0.0433776	0.270618
ENSMUSG00000045411.16	2410002F23Rik	611.511	0.324976	0.0705563	0.365408
ENSMUSG00000040938.16	Slc16a11	60.6254	0.324792	0.201735	0.626641
ENSMUSG00000097033.1	NA	126.867	0.324652	0.137022	0.520757
ENSMUSG00000030839.10	Sergef	98.6315	0.324089	0.181827	0.597575
ENSMUSG00000036106.15	Prr5	212.09	0.32407	0.140952	0.52825
ENSMUSG00000042364.10	Snx18	951.982	0.323798	0.0154583	0.141501
ENSMUSG00000042510.7	AA986860	629.076	0.323734	0.150043	0.544865
ENSMUSG00000003352.13	Cacnb3	622.956	0.32373	0.0769788	0.384364
ENSMUSG00000069515.5	Lyz1	249.654	0.323482	0.0775732	0.385413
ENSMUSG00000035873.7	Pawr	1082.66	0.323366	0.00578326	0.0712434
ENSMUSG00000013643.13	Lypd8	378.189	0.323177	0.229306	0.671116
ENSMUSG00000062248.5	Cks2	60.184	0.323127	0.233982	0.677669
ENSMUSG00000021176.5	Efcab11	71.422	0.322899	0.250177	0.698206
ENSMUSG00000026065.8	Slc9a4	410.991	0.322807	0.193253	0.613374
ENSMUSG00000022814.6	Umps	754.202	0.322802	0.0041356	0.0560532
ENSMUSG00000007836.6	Hnrnpa0	1758.56	0.322688	0.00450035	0.0596731
ENSMUSG00000020009.12	Ifngr1	1002.88	0.322588	0.038961	0.254419
ENSMUSG00000037661.14	Gpr160	95.3843	0.322343	0.142891	0.531436
ENSMUSG00000071547.3	Nt5dc2	142.851	0.322127	0.172035	0.582703
ENSMUSG00000075703.15	Ept1	2017.58	0.322008	0.00198482	0.0332719
ENSMUSG00000041161.8	Otud3	399.239	0.321923	0.0109914	0.112352
ENSMUSG00000019832.3	Rab32	187.103	0.321885	0.0842175	0.402891
ENSMUSG00000033554.17	Dph5	196.46	0.321765	0.13788	0.523326
ENSMUSG00000056708.5	Ier5	679.289	0.321708	0.0183768	0.157468
ENSMUSG00000071266.13	Zfp946	331.023	0.321628	0.0710968	0.366723
ENSMUSG00000097589.9	NA	134.432	0.321492	0.16813	0.575073
ENSMUSG00000036023.5	Parp2	597.234	0.321427	0.0179854	0.155162
ENSMUSG00000031379.13	Pir	296.534	0.321058	0.0837731	0.401787
ENSMUSG00000039396.10	Neil3	360.625	0.321016	0.235364	0.678798
ENSMUSG00000029780.14	Nt5c3	488.107	0.320689	0.00803761	0.0911832
ENSMUSG00000050148.9	Ubqln2	718.985	0.320688	0.0127621	0.124489
ENSMUSG00000025545.9	Clybl	376.909	0.320593	0.0230391	0.181355
ENSMUSG00000086429.9	NA	271.488	0.320524	0.0531108	0.305368
ENSMUSG00000006154.13	Eps8l1	194.946	0.320363	0.23761	0.681437
ENSMUSG00000025207.15	Sema4g	1729.73	0.320156	0.0160057	0.144033
ENSMUSG00000035310.15	Lin54	529.362	0.320059	0.0399072	0.256935
ENSMUSG00000021686.4	Ap3b1	1663	0.319948	0.00187211	0.0319778
ENSMUSG00000071551.12	Akr1c19	245.043	0.319931	0.176178	0.589425
ENSMUSG00000032846.9	Zswim6	435.281	0.319877	0.0549072	0.311112
ENSMUSG00000028044.6	Cks1b	373.787	0.31981	0.0499034	0.29409
ENSMUSG00000033065.13	Pfkm	722.838	0.319758	0.0572456	0.319745
ENSMUSG00000025938.16	Slco5a1	829.481	0.319588	0.120408	0.490744
ENSMUSG00000021957.6	Tkt	2309.94	0.319278	0.000955198	0.0190887
ENSMUSG00000029552.19	Tes	1566.95	0.318806	0.0326602	0.226788
ENSMUSG00000035704.17	Alg8	295.22	0.31819	0.0670362	0.353391
ENSMUSG00000029202.12	Pds5a	2494.97	0.318063	0.0141301	0.132429
ENSMUSG00000022906.15	Parp9	1288.42	0.317834	0.0117731	0.11732
ENSMUSG00000031337.16	Mtm1	377.808	0.317806	0.0186341	0.159008
ENSMUSG00000091705.8	H2-Q2	482.753	0.317735	0.0693469	0.361415
ENSMUSG00000048327.6	Ckap2l	862.239	0.317634	0.255522	0.703853
ENSMUSG00000024885.8	Aldh3b1	127.028	0.317575	0.203762	0.63059
ENSMUSG00000042616.7	Oscp1	104.111	0.317394	0.10457	0.456803
ENSMUSG00000070780.11	Rbm47	1092.85	0.317299	0.0284502	0.208201
ENSMUSG00000090877.3	Hspa1b	394.664	0.316565	0.0742761	0.376401
ENSMUSG00000027533.10	Fabp5	84.0836	0.316281	0.148528	0.541498
ENSMUSG00000079109.11	Pms2	355.758	0.315825	0.0378192	0.249893
ENSMUSG00000030188.12	Magohb	166.723	0.315718	0.0667829	0.352487
ENSMUSG00000022960.12	Donson	300.118	0.315494	0.0720775	0.369
ENSMUSG00000085566.1	NA	146.372	0.31547	0.173183	0.583846
ENSMUSG00000024056.9	Ndc80	480.385	0.315133	0.250981	0.699431
ENSMUSG00000025212.16	Sfxn3	890.955	0.315092	0.0710972	0.366723
ENSMUSG00000034601.16	2700049A03Rik	1163.8	0.315011	0.025819	0.195181
ENSMUSG00000024542.8	Cep192	1462.17	0.315001	0.0650599	0.345624
ENSMUSG00000029381.15	Shroom3	1513.22	0.314916	0.0233734	0.183331
ENSMUSG00000068335.6	Dok1	432.901	0.314652	0.0130727	0.126171
ENSMUSG00000026991.20	Pkp4	2504.44	0.314208	0.00435065	0.0581556
ENSMUSG00000032727.13	Mier3	580.563	0.314117	0.0641289	0.342554
ENSMUSG00000049090.2	Zadh2	500.247	0.314032	0.0740073	0.3755
ENSMUSG00000024667.11	Tmem216	119.897	0.313992	0.125449	0.499568
ENSMUSG00000018189.12	Uchl5	547.222	0.313944	0.00828247	0.0931919
ENSMUSG00000064210.6	Ano6	1577.43	0.313875	0.0440253	0.273006
ENSMUSG00000020739.11	Nup85	685.406	0.313852	0.127266	0.503186
ENSMUSG00000053835.17	H2-T24	165.894	0.313834	0.0785366	0.387863
ENSMUSG00000033717.5	Adra2a	985.302	0.313706	0.123516	0.496199
ENSMUSG00000039405.6	Prss23	510.199	0.313274	0.0297733	0.214085
ENSMUSG00000062822.7	4833420G17Rik	784.241	0.313233	0.0541702	0.308649
ENSMUSG00000069206.13	Zfp874a	296.84	0.312884	0.0374591	0.248048
ENSMUSG00000039578.16	Ccser1	401.954	0.312529	0.0643356	0.343213
ENSMUSG00000026708.16	Cenpl	343.315	0.312226	0.139673	0.526247
ENSMUSG00000027276.7	Jag1	946.985	0.311933	0.0820059	0.396548
ENSMUSG00000037313.16	Tacc3	932.714	0.311781	0.266796	0.719202
ENSMUSG00000020808.3	Fam64a	491.6	0.311781	0.261406	0.712476
ENSMUSG00000023832.13	Acat2	397.219	0.311448	0.0715424	0.367487
ENSMUSG00000012443.3	Kif11	1489.29	0.311417	0.266888	0.719202
ENSMUSG00000053730.15	Tmem39b	197.77	0.311233	0.121027	0.491784
ENSMUSG00000025785.4	Exosc7	517.496	0.311145	0.0371721	0.24714
ENSMUSG00000071637.4	Cebpd	393.457	0.311078	0.0948509	0.433038
ENSMUSG00000044716.12	Dok7	485.966	0.311064	0.0554597	0.313432
ENSMUSG00000067931.5	Zfp948	182.647	0.31096	0.0818196	0.396246
ENSMUSG00000106933.1	NA	55.7508	0.310942	0.194825	0.616113
ENSMUSG00000040350.15	Trim7	85.4356	0.310723	0.203001	0.628826
ENSMUSG00000034928.16	Rnf44	2709.49	0.310495	0.00207183	0.0341749
ENSMUSG00000035293.13	G2e3	1674.26	0.310063	0.123693	0.496435
ENSMUSG00000001665.10	Gstt3	282.869	0.310004	0.100999	0.449049
ENSMUSG00000035139.14	Secisbp2	434.707	0.309843	0.036683	0.245371
ENSMUSG00000059456.13	Ptk2b	882.194	0.309833	0.0629662	0.339643
ENSMUSG00000024511.15	Rab27b	331.433	0.309809	0.1802	0.595269
ENSMUSG00000001700.9	Gramd3	650.311	0.30972	0.046016	0.279983
ENSMUSG00000034789.7	Rab24	607.439	0.309679	0.0102547	0.108073
ENSMUSG00000032776.9	Mctp2	210.097	0.309651	0.064398	0.343324
ENSMUSG00000031134.16	Rbmx	693.856	0.309578	0.0273065	0.202723
ENSMUSG00000027171.10	Prrg4	306.716	0.309546	0.0840332	0.402476
ENSMUSG00000022885.15	St6gal1	194.894	0.309512	0.269995	0.723067
ENSMUSG00000021468.7	Sptlc1	812.302	0.30933	0.00687743	0.0810887
ENSMUSG00000024421.16	Lama3	1805.28	0.309255	0.182534	0.598588
ENSMUSG00000062127.11	Cttnbp2nl	1649.65	0.309191	0.0683555	0.357941
ENSMUSG00000052271.7	Bhlha15	83.2088	0.309172	0.254549	0.702373
ENSMUSG00000020087.4	Tysnd1	318.003	0.308964	0.0846633	0.403502
ENSMUSG00000046573.6	Lyrm4	132.001	0.308738	0.0976108	0.441362
ENSMUSG00000005481.17	Ddx39	792.483	0.308616	0.00646535	0.0776172
ENSMUSG00000028884.14	Rpa2	515.359	0.30763	0.0810197	0.394308
ENSMUSG00000029863.13	Casp2	1130.39	0.307555	0.0134954	0.128526
ENSMUSG00000024401.14	Tnf	471.846	0.307298	0.00763245	0.0879171
ENSMUSG00000044201.9	Cdc25c	325.667	0.307196	0.244014	0.690751
ENSMUSG00000040272.14	Accs	116.641	0.307187	0.22521	0.664798
ENSMUSG00000034311.3	Kif4	620	0.307133	0.261112	0.712182
ENSMUSG00000022033.9	Pbk	484.675	0.306847	0.269612	0.723012
ENSMUSG00000020773.11	Trim47	154.697	0.306723	0.162154	0.565442
ENSMUSG00000025647.16	Shisa5	1517.54	0.306563	0.00119937	0.0228514
ENSMUSG00000028494.12	Plin2	881.235	0.306358	0.0170471	0.149706
ENSMUSG00000021484.7	Lman2	2130.24	0.306205	0.0180523	0.155657
ENSMUSG00000006715.11	Gmnn	655.425	0.305967	0.082963	0.399438
ENSMUSG00000021635.13	Rad17	550.064	0.305917	0.0165705	0.147189
ENSMUSG00000027654.2	Fam83d	390.823	0.305721	0.267428	0.719584
ENSMUSG00000027082.15	Tfpi	58.7676	0.305478	0.263937	0.715825
ENSMUSG00000068245.14	Phf11d	137.871	0.305323	0.266789	0.719202
ENSMUSG00000027405.16	Nop56	872.356	0.305273	0.0461517	0.280291
ENSMUSG00000047613.10	A430005L14Rik	238.908	0.30515	0.0408665	0.259782
ENSMUSG00000044783.16	Hjurp	3612.29	0.305008	0.0812021	0.394879
ENSMUSG00000028776.14	Tinagl1	897.107	0.304686	0.0565921	0.31778
ENSMUSG00000021338.17	Lrrc16a	1477.54	0.304602	0.00155958	0.0279318
ENSMUSG00000029125.14	Stx18	533.548	0.304564	0.0107293	0.110751
ENSMUSG00000041112.15	Elmo1	671.375	0.304552	0.0702077	0.364519
ENSMUSG00000003299.9	Mrpl4	295.621	0.304496	0.0708821	0.366406
ENSMUSG00000021287.12	Xrcc3	324.362	0.304473	0.0366461	0.245288
ENSMUSG00000090021.1	NA	346.762	0.304285	0.04382	0.272245
ENSMUSG00000043262.14	Uevld	530.857	0.304122	0.0631182	0.33972
ENSMUSG00000068394.4	Cep152	329.61	0.304106	0.0639575	0.342267
ENSMUSG00000036537.6	Rnf113a1	71.2063	0.304037	0.161768	0.564872
ENSMUSG00000057863.5	Rpl36	93.1415	0.303933	0.14257	0.530851
ENSMUSG00000026304.13	Rab17	535.266	0.303837	0.0243935	0.188288
ENSMUSG00000005968.14	Tuft1	1418.82	0.303684	0.0109467	0.112083
ENSMUSG00000038047.18	Haus6	725.665	0.303657	0.0767563	0.383559
ENSMUSG00000037904.14	Ankrd9	144.531	0.303328	0.129924	0.50736
ENSMUSG00000081670.1	NA	122.893	0.303246	0.262609	0.713513
ENSMUSG00000027378.16	Nphp1	221.327	0.303118	0.135073	0.517463
ENSMUSG00000095432.8	Zfp748	428.29	0.302668	0.110586	0.471346
ENSMUSG00000035441.14	Myo1d	2636.23	0.302508	0.0380592	0.250413
ENSMUSG00000039601.15	Rcan2	87.6714	0.302446	0.281287	0.734034
ENSMUSG00000021365.14	Nedd9	1605.54	0.302278	0.0776316	0.385587
ENSMUSG00000036295.4	Lrrn3	287.86	0.302152	0.26195	0.712895
ENSMUSG00000061838.7	Suclg2	469.44	0.301731	0.0157486	0.142706
ENSMUSG00000037725.7	Ckap2	672.431	0.301666	0.279437	0.732102
ENSMUSG00000040987.14	Mill2	52.9851	0.301401	0.269844	0.723067
ENSMUSG00000016503.16	Gtf3a	167.489	0.300977	0.0755703	0.380156
ENSMUSG00000030711.15	Sult1a1	122.089	0.300969	0.239747	0.684427
ENSMUSG00000046500.8	Fam19a4	56.5412	0.300826	0.282231	0.734245
ENSMUSG00000025873.15	Faf2	1608.24	0.300783	0.0248059	0.190401
ENSMUSG00000041453.12	Rpl21	135.06	0.30078	0.0876697	0.412703
ENSMUSG00000046879.6	Irgm1	861.498	0.300666	0.00776488	0.0887632
ENSMUSG00000067367.9	Lyar	613.474	0.30049	0.123248	0.49584
ENSMUSG00000022945.11	Chaf1b	463.581	0.300466	0.112488	0.476502
ENSMUSG00000005312.14	Ubqln1	2101.02	0.300396	0.00552885	0.0692723
ENSMUSG00000037278.9	Tmem97	389.861	0.300003	0.0230113	0.181355
ENSMUSG00000068011.4	Mkrn2os	475.738	0.29971	0.0253564	0.1931
ENSMUSG00000082674.1	NA	60.8828	0.299486	0.249253	0.696972
ENSMUSG00000043183.18	Simc1	455.921	0.299312	0.0814063	0.395052
ENSMUSG00000029246.14	Ppat	946.491	0.29923	0.0337858	0.231923
ENSMUSG00000039242.9	B3galnt2	709.039	0.299187	0.0652749	0.346421
ENSMUSG00000021149.7	Gtpbp4	1092.95	0.299149	0.0282217	0.206896
ENSMUSG00000040969.14	Arhgef38	1215.94	0.299073	0.0238266	0.185474
ENSMUSG00000052798.12	Nup107	774.989	0.299023	0.0344009	0.234287
ENSMUSG00000027889.17	Ampd2	849.495	0.298978	0.0899063	0.419283
ENSMUSG00000071708.11	Sms	308.284	0.29863	0.113148	0.477335
ENSMUSG00000032515.7	Csrnp1	412.195	0.298324	0.107418	0.463232
ENSMUSG00000048351.14	Coa7	306.392	0.298294	0.068905	0.359566
ENSMUSG00000103921.1	NA	84.046	0.297284	0.207985	0.638518
ENSMUSG00000036632.9	Alg5	497.278	0.297247	0.0325827	0.226581
ENSMUSG00000058704.7	Memo1	603.266	0.297177	0.0108042	0.111037
ENSMUSG00000054115.11	Skp2	280.509	0.296857	0.140524	0.527653
ENSMUSG00000038301.15	Snx10	930.907	0.296306	0.0289582	0.20993
ENSMUSG00000032586.9	Traip	335.256	0.29613	0.158662	0.559334
ENSMUSG00000021693.19	Kif2a	1031.92	0.295772	0.0208616	0.170691
ENSMUSG00000024533.15	Spire1	568.143	0.295733	0.0370016	0.246802
ENSMUSG00000021638.12	Ocln	1648.89	0.295653	0.00532626	0.0673747
ENSMUSG00000090394.8	4930523C07Rik	1048.93	0.295651	0.0595404	0.327175
ENSMUSG00000018821.3	Avpi1	318.685	0.295638	0.0539098	0.308055
ENSMUSG00000031697.11	Orc6	504.241	0.295372	0.050535	0.296857
ENSMUSG00000038683.15	Pak1ip1	668.083	0.295325	0.0327677	0.227012
ENSMUSG00000040616.3	Tmem51	497.022	0.295226	0.0434652	0.271062
ENSMUSG00000085492.7	NA	139.349	0.294856	0.0984677	0.442706
ENSMUSG00000035840.6	Lysmd3	731.511	0.294785	0.108049	0.46466
ENSMUSG00000029135.10	Fosl2	3126.52	0.294615	0.00826293	0.0930991
ENSMUSG00000026856.14	Dolpp1	264.162	0.294379	0.0370184	0.246814
ENSMUSG00000024287.7	Thoc1	780.986	0.294361	0.00422897	0.0570745
ENSMUSG00000055240.16	Zfp101	304.101	0.293963	0.169157	0.577046
ENSMUSG00000021669.14	Col4a3bp	1301.69	0.293945	0.0207653	0.170072
ENSMUSG00000063652.10	Slc22a21	138.052	0.293805	0.172764	0.583246
ENSMUSG00000022471.13	Xrcc6	774.776	0.293692	0.038748	0.25363
ENSMUSG00000051378.10	Kif18b	655.588	0.293593	0.286066	0.738329
ENSMUSG00000028995.14	Fam126a	249.238	0.293335	0.0939126	0.430821
ENSMUSG00000025154.14	Arhgap19	811.336	0.293315	0.243748	0.690592
ENSMUSG00000038212.15	Mfsd14b	1262.8	0.292764	0.0223488	0.178739
ENSMUSG00000015748.13	Prpf3	565.786	0.292663	0.00968052	0.103914
ENSMUSG00000022364.14	Tbc1d31	816.129	0.292588	0.139926	0.526522
ENSMUSG00000069135.11	Fgfr1op	830.471	0.292551	0.0617894	0.33571
ENSMUSG00000027306.15	Nusap1	1041.22	0.292185	0.293883	0.745252
ENSMUSG00000020973.7	Dnaaf2	308.402	0.292089	0.0495916	0.29267
ENSMUSG00000024301.9	Kifc5b	167.684	0.291745	0.27869	0.731753
ENSMUSG00000032218.6	Ccnb2	806.489	0.291736	0.294166	0.745252
ENSMUSG00000020692.14	Nle1	315.226	0.291683	0.150723	0.54533
ENSMUSG00000020623.11	Map2k6	176.327	0.291659	0.195355	0.617078
ENSMUSG00000027160.16	Ccdc34	612.585	0.291342	0.0868786	0.410478
ENSMUSG00000003779.15	Kif20a	868.905	0.291027	0.297131	0.74754
ENSMUSG00000025912.16	Mybl1	114.147	0.290952	0.27818	0.731014
ENSMUSG00000031919.5	Tmed6	153.735	0.290879	0.237946	0.682022
ENSMUSG00000041642.18	Kif21b	1250.05	0.290815	0.0657631	0.348462
ENSMUSG00000081402.4	NA	88.3311	0.290779	0.151132	0.54619
ENSMUSG00000018697.14	Aatf	478.613	0.290773	0.0415127	0.262861
ENSMUSG00000042694.17	Obfc1	437.996	0.290734	0.0881326	0.413937
ENSMUSG00000036672.4	Cenpt	250.867	0.290716	0.190199	0.609201
ENSMUSG00000032783.8	Troap	450.773	0.290132	0.282743	0.734245
ENSMUSG00000085711.4	NA	281.165	0.290101	0.0366505	0.245288
ENSMUSG00000021520.4	Uqcrb	120.723	0.290055	0.132352	0.512107
ENSMUSG00000073233.3	NA	161.284	0.289992	0.16352	0.56701
ENSMUSG00000035367.8	Rmi1	100.927	0.289808	0.180503	0.595717
ENSMUSG00000030166.14	Rad52	322.506	0.289617	0.0871888	0.410966
ENSMUSG00000020528.14	Prpsap2	147.515	0.289419	0.134239	0.515547
ENSMUSG00000039349.5	C130074G19Rik	2119.6	0.28876	0.0540352	0.308375
ENSMUSG00000027959.13	Sass6	302.045	0.288637	0.203509	0.629927
ENSMUSG00000037795.14	N4bp2	769.47	0.288533	0.0777374	0.38588
ENSMUSG00000021764.6	Ndufs4	525.358	0.288439	0.0349537	0.236789
ENSMUSG00000034525.6	Ice1	1572.28	0.288388	0.031561	0.222478
ENSMUSG00000030662.9	Ipo5	2162.74	0.28838	0.00236307	0.0375881
ENSMUSG00000021577.13	Sdha	2633.41	0.288131	0.0106642	0.110424
ENSMUSG00000025190.13	Got1	447.417	0.287946	0.0939407	0.430821
ENSMUSG00000026019.15	Wdr12	297.414	0.287613	0.104724	0.457111
ENSMUSG00000027951.16	Adar	1074.56	0.287419	0.00796615	0.0907469
ENSMUSG00000003528.14	Slc25a1	1109.2	0.287335	0.0113967	0.114767
ENSMUSG00000025453.16	Nnt	298.595	0.287325	0.195932	0.618212
ENSMUSG00000020471.11	Pold2	624.173	0.287247	0.0383931	0.251907
ENSMUSG00000045620.6	Odf3l1	273.996	0.287182	0.100155	0.446742
ENSMUSG00000042808.7	Gpx2	731.436	0.287166	0.00425945	0.0573133
ENSMUSG00000032724.5	Abtb2	192.359	0.28687	0.26448	0.71681
ENSMUSG00000045027.6	Prss22	313.59	0.286803	0.273355	0.726558
ENSMUSG00000021716.14	Srek1ip1	555.155	0.286585	0.0667527	0.352487
ENSMUSG00000021488.7	Nsd1	3110.57	0.286583	0.0679673	0.356477
ENSMUSG00000027597.15	Ahcy	161.123	0.286577	0.183626	0.599546
ENSMUSG00000032807.5	Alox12b	50.4877	0.28635	0.275707	0.729046
ENSMUSG00000032745.17	Gpbp1	1823.28	0.286159	0.0261492	0.196865
ENSMUSG00000045725.5	Prr15	591.435	0.285702	0.027371	0.203097
ENSMUSG00000009470.16	Tnpo1	3339.17	0.285489	0.045743	0.279042
ENSMUSG00000005803.14	Sqrdl	970.045	0.285353	0.0148485	0.13781
ENSMUSG00000034659.14	Tmem109	532.016	0.285241	0.0930816	0.428758
ENSMUSG00000019851.7	Perp	1294.35	0.28483	0.0121555	0.120063
ENSMUSG00000032322.14	Pstpip1	91.1346	0.284425	0.288476	0.740628
ENSMUSG00000028133.17	Rwdd3	109.76	0.284291	0.150576	0.54516
ENSMUSG00000030177.14	Ccdc77	489.842	0.284214	0.18353	0.59954
ENSMUSG00000099858.1	NA	165.229	0.28409	0.194143	0.615015
ENSMUSG00000038368.16	Focad	818.462	0.284062	0.0209238	0.171043
ENSMUSG00000032478.14	Nme6	198.417	0.284055	0.120299	0.490565
ENSMUSG00000002297.15	Dbf4	964.033	0.283978	0.0867393	0.410108
ENSMUSG00000035818.13	Plekhs1	1337.61	0.283861	0.0713114	0.367129
ENSMUSG00000026281.15	Dtymk	557.747	0.283606	0.0946036	0.432268
ENSMUSG00000032348.5	Gsta4	714.519	0.28354	0.0237608	0.185136
ENSMUSG00000068141.5	NA	54.7176	0.283387	0.224143	0.663302
ENSMUSG00000071451.9	Psmg4	124.83	0.283172	0.150632	0.545245
ENSMUSG00000053600.7	Zfp472	265.872	0.283138	0.0572929	0.319745
ENSMUSG00000062794.8	Zfp599	150.382	0.283086	0.172267	0.582789
ENSMUSG00000021643.14	Serf1	118.776	0.282567	0.161312	0.564364
ENSMUSG00000021428.8	Riok1	439.586	0.282544	0.108584	0.465704
ENSMUSG00000037544.13	Dlgap5	825.568	0.282257	0.303682	0.75362
ENSMUSG00000085705.1	NA	63.0552	0.28212	0.225274	0.664857
ENSMUSG00000020895.14	Tmem107	143.77	0.282023	0.11631	0.482894
ENSMUSG00000085627.2	NA	70.6141	0.281907	0.209897	0.64223
ENSMUSG00000063810.6	Alms1	303.218	0.281768	0.186939	0.604509
ENSMUSG00000028832.11	Stmn1	110.397	0.281481	0.170245	0.579127
ENSMUSG00000081752.3	NA	144.478	0.281308	0.121295	0.491784
ENSMUSG00000038515.9	Grtp1	229.41	0.281282	0.100421	0.447446
ENSMUSG00000020024.6	Cep83	611.796	0.281281	0.0301475	0.215741
ENSMUSG00000021007.13	Spata7	174.267	0.280848	0.184069	0.599923
ENSMUSG00000019917.9	40422	695.835	0.280689	0.117675	0.485845
ENSMUSG00000031328.15	Flna	5097.65	0.280657	0.055062	0.311684
ENSMUSG00000022724.15	Mina	413.55	0.280597	0.0631246	0.33972
ENSMUSG00000021418.15	Rpp40	101.166	0.280265	0.167352	0.573543
ENSMUSG00000061517.8	Sox21	1112.87	0.280048	0.0302376	0.216198
ENSMUSG00000042331.13	Specc1	845.334	0.279964	0.0351305	0.237783
ENSMUSG00000028807.2	Zbtb8a	327.35	0.279634	0.0490167	0.291102
ENSMUSG00000061689.15	Dlgap4	1510.05	0.279575	0.0141392	0.132439
ENSMUSG00000001948.9	Spa17	106.907	0.279333	0.154723	0.552894
ENSMUSG00000001642.18	Akr1b3	94.1428	0.279178	0.163205	0.566721
ENSMUSG00000090841.1	Myl6	239.169	0.279093	0.114402	0.479068
ENSMUSG00000027883.15	Gpsm2	992.807	0.279005	0.0571461	0.319745
ENSMUSG00000029175.17	Slc35f6	495.907	0.278879	0.106103	0.46057
ENSMUSG00000045314.5	Sowahb	562.328	0.278581	0.0898773	0.419266
ENSMUSG00000027357.16	Crls1	525.411	0.278459	0.0251106	0.191582
ENSMUSG00000030123.15	Plxnd1	1237.16	0.278401	0.121166	0.491784
ENSMUSG00000000278.10	Scpep1	801.658	0.278216	0.0158408	0.14315
ENSMUSG00000068417.7	Pnp2	75.0501	0.27775	0.282672	0.734245
ENSMUSG00000022353.9	Mtss1	1039.39	0.277728	0.0281146	0.206295
ENSMUSG00000043091.8	Tuba1c	203.078	0.277442	0.103531	0.454549
ENSMUSG00000031934.13	Panx1	246.353	0.277375	0.123183	0.495828
ENSMUSG00000074909.4	Ranbp6	689.901	0.277274	0.0291001	0.210529
ENSMUSG00000040414.7	Slc25a28	541.283	0.277132	0.0849265	0.404056
ENSMUSG00000037126.15	Psd	148.499	0.277003	0.106287	0.461125
ENSMUSG00000041079.11	Rwdd2b	179.587	0.276788	0.199559	0.623968
ENSMUSG00000101599.1	NA	103.075	0.276677	0.204915	0.632618
ENSMUSG00000054021.5	Sirt5	140.999	0.276366	0.142601	0.530851
ENSMUSG00000034317.14	Trim59	1017.73	0.276142	0.150306	0.544865
ENSMUSG00000031129.9	Slc9a9	82.3465	0.275871	0.32292	0.772415
ENSMUSG00000019883.10	Echdc1	188.394	0.275748	0.148082	0.540641
ENSMUSG00000039410.16	Prdm16	681.092	0.275739	0.21685	0.652819
ENSMUSG00000033952.14	Aspm	1336.61	0.275611	0.304899	0.755003
ENSMUSG00000001300.15	Efnb2	806.598	0.275362	0.238542	0.683045
ENSMUSG00000023087.15	Noct	294.59	0.275129	0.122016	0.493382
ENSMUSG00000031955.9	Bcar1	962.765	0.275055	0.0641066	0.342546
ENSMUSG00000025665.16	Rps6ka6	376.039	0.275005	0.0964256	0.43775
ENSMUSG00000051397.5	Tacstd2	1196.58	0.274972	0.0304336	0.217317
ENSMUSG00000083994.1	NA	115.924	0.274934	0.231156	0.672739
ENSMUSG00000041498.13	Kif14	535.643	0.2748	0.296864	0.747483
ENSMUSG00000056602.11	Fry	539.824	0.274779	0.252038	0.70049
ENSMUSG00000040498.6	Igsf23	391.282	0.274662	0.242568	0.688636
ENSMUSG00000097769.7	NA	153.853	0.274434	0.108646	0.465849
ENSMUSG00000051076.8	Vtcn1	361.8	0.274337	0.260917	0.712182
ENSMUSG00000037103.7	Dcaf15	741.486	0.274119	0.0107956	0.111037
ENSMUSG00000058093.12	Zfp729b	310.749	0.274029	0.163436	0.56701
ENSMUSG00000033318.6	Gstt2	382.495	0.273905	0.142507	0.530851
ENSMUSG00000061143.15	Maml3	556.912	0.273887	0.105378	0.45878
ENSMUSG00000024036.15	Slc37a1	849.016	0.273853	0.106523	0.461424
ENSMUSG00000029757.16	Dync1i1	361.728	0.273306	0.210389	0.643255
ENSMUSG00000029687.16	Ezh2	1344.31	0.273176	0.0159814	0.143972
ENSMUSG00000022503.10	Nubp1	267.05	0.273046	0.141291	0.528718
ENSMUSG00000019850.11	Tnfaip3	1110.88	0.272905	0.0183756	0.157468
ENSMUSG00000039910.9	Cited2	415.645	0.272815	0.171944	0.582703
ENSMUSG00000049502.16	Dtx3l	1634.59	0.272812	0.0594351	0.326844
ENSMUSG00000028282.12	Casp8ap2	770.515	0.272735	0.0811234	0.394612
ENSMUSG00000021460.16	Auh	636.28	0.27259	0.150385	0.544865
ENSMUSG00000021496.12	Pcbd2	90.2159	0.272488	0.236712	0.680476
ENSMUSG00000038126.17	Mphosph9	272.743	0.272384	0.182994	0.599362
ENSMUSG00000024867.14	Pip5k1b	377.15	0.272374	0.0571676	0.319745
ENSMUSG00000026278.14	Bok	922.478	0.272297	0.0734364	0.373638
ENSMUSG00000024399.5	Ltb	242.333	0.272229	0.101334	0.449817
ENSMUSG00000052291.7	NA	104.667	0.272086	0.187483	0.605547
ENSMUSG00000059900.14	Tmem40	142.182	0.272031	0.313935	0.763118
ENSMUSG00000005413.7	Hmox1	190.3	0.271917	0.23113	0.672739
ENSMUSG00000027222.14	Pex16	244.314	0.271543	0.0961643	0.437663
ENSMUSG00000028633.7	Ctps	920.143	0.271385	0.129812	0.507284
ENSMUSG00000067276.5	Capn6	141.213	0.27134	0.280556	0.733393
ENSMUSG00000064289.15	Tank	913.297	0.27106	0.0266319	0.199255
ENSMUSG00000035960.13	Apex1	206.197	0.270935	0.105723	0.459889
ENSMUSG00000001166.17	Oas1c	54.6041	0.270859	0.254595	0.702381
ENSMUSG00000054717.6	Hmgb2	261.671	0.270788	0.177057	0.590174
ENSMUSG00000021495.8	Fam193b	1935.03	0.270424	0.0281045	0.206295
ENSMUSG00000002266.15	Zim1	89.8935	0.270275	0.313675	0.763118
ENSMUSG00000004996.9	Mri1	683.918	0.270218	0.132474	0.512107
ENSMUSG00000024067.13	Dpy30	339.067	0.27003	0.0674376	0.354488
ENSMUSG00000029821.15	Dfna5	199.134	0.269797	0.176172	0.589425
ENSMUSG00000025403.4	Shmt2	922.183	0.269725	0.0888181	0.4155
ENSMUSG00000081816.1	NA	57.2339	0.269641	0.269879	0.723067
ENSMUSG00000031403.14	Dkc1	745.167	0.269429	0.121609	0.492497
ENSMUSG00000067608.4	Pcna-ps2	245.614	0.269336	0.117278	0.485208
ENSMUSG00000001763.14	Tspan33	120.073	0.269298	0.270533	0.723718
ENSMUSG00000024258.3	Polr2d	325.348	0.268684	0.0546183	0.310451
ENSMUSG00000036737.12	Oxsr1	1289.66	0.268657	0.00396487	0.0545459
ENSMUSG00000056234.14	Ncoa4	150.349	0.268605	0.148544	0.541498
ENSMUSG00000056671.6	Prelid2	296.776	0.268553	0.053351	0.306309
ENSMUSG00000029705.17	Cux1	1418.36	0.268467	0.0477591	0.286676
ENSMUSG00000022678.16	Nde1	1182.53	0.26834	0.118697	0.487926
ENSMUSG00000005981.11	Trap1	1274.47	0.268305	0.0543769	0.309612
ENSMUSG00000021118.7	Plek2	422.733	0.26821	0.159396	0.560484
ENSMUSG00000030095.10	Tmem43	967.745	0.268164	0.024044	0.186462
ENSMUSG00000055866.9	Per2	495.849	0.268158	0.0963695	0.43775
ENSMUSG00000028961.15	Pgd	1102.88	0.267834	0.104645	0.456887
ENSMUSG00000001707.7	Eef1e1	397.214	0.267655	0.0861909	0.408188
ENSMUSG00000056209.7	Npm3	112.771	0.26765	0.172114	0.582789
ENSMUSG00000032666.16	1700025G04Rik	800.034	0.267628	0.147656	0.540225
ENSMUSG00000021270.13	Hsp90aa1	613.242	0.267522	0.104027	0.456001
ENSMUSG00000040782.12	Rfwd2	378.204	0.267247	0.0522	0.302225
ENSMUSG00000022756.15	Slc7a4	168.083	0.266889	0.323241	0.772589
ENSMUSG00000021133.8	Susd6	1716.94	0.266809	0.00420374	0.0568448
ENSMUSG00000022836.10	Mylk	257.152	0.266531	0.333578	0.782364
ENSMUSG00000028224.14	Nbn	432.6	0.266341	0.0287626	0.209096
ENSMUSG00000026617.15	Bpnt1	953.023	0.2662	0.0827488	0.399085
ENSMUSG00000059326.6	Csf2ra	274.517	0.266132	0.136637	0.519916
ENSMUSG00000049721.14	Gal3st1	246.17	0.266129	0.238965	0.683102
ENSMUSG00000065979.12	Cpped1	568.518	0.26598	0.0613965	0.334678
ENSMUSG00000074578.12	Zfas1	512.74	0.265662	0.0182703	0.156983
ENSMUSG00000068744.12	Psrc1	304.615	0.265555	0.333151	0.782364
ENSMUSG00000021555.14	Naa35	1404.2	0.26539	0.125165	0.499298
ENSMUSG00000042228.14	Lyn	311.627	0.265164	0.0962355	0.437663
ENSMUSG00000070282.6	NA	51.0848	0.265136	0.298018	0.748107
ENSMUSG00000029238.11	Clock	2649.8	0.265093	0.0103698	0.108741
ENSMUSG00000051615.13	Rap2a	978.704	0.265022	0.0745969	0.377208
ENSMUSG00000020413.11	Hus1	410.346	0.264871	0.100862	0.448684
ENSMUSG00000029014.14	Dnajc2	726.894	0.264869	0.0291537	0.210732
ENSMUSG00000021476.8	Habp4	291.605	0.264744	0.104844	0.457514
ENSMUSG00000032518.5	Rpsa	67.895	0.264552	0.221216	0.658775
ENSMUSG00000090290.1	Gm17296	319.719	0.263476	0.187258	0.605175
ENSMUSG00000028555.15	Ttc39a	252.203	0.263413	0.225381	0.664936
ENSMUSG00000041506.14	Rrp9	386.284	0.263373	0.195826	0.618212
ENSMUSG00000091408.3	NA	100.045	0.263354	0.184933	0.601155
ENSMUSG00000099843.1	NA	62.0929	0.262994	0.259585	0.710327
ENSMUSG00000049891.3	NA	109.417	0.262987	0.176892	0.590059
ENSMUSG00000020877.11	Scrn2	309.992	0.262943	0.126201	0.501488
ENSMUSG00000003948.16	Mmd	185.191	0.262734	0.217905	0.65477
ENSMUSG00000074088.6	Snrnp40	668.388	0.262499	0.0263431	0.197963
ENSMUSG00000021025.7	Nfkbia	1204.95	0.262482	0.0265559	0.198994
ENSMUSG00000033166.10	Dis3	707.516	0.262418	0.022779	0.180297
ENSMUSG00000021589.12	Rhobtb3	583.656	0.262365	0.0773778	0.384835
ENSMUSG00000001473.6	Tubb6	1080.81	0.262245	0.0630093	0.339684
ENSMUSG00000025271.13	Pfkfb1	63.496	0.262054	0.308962	0.758721
ENSMUSG00000021704.7	Mtx3	549.272	0.261953	0.1175	0.485753
ENSMUSG00000058900.4	Rsl1	114.215	0.261631	0.233941	0.677669
ENSMUSG00000029851.5	Tcaf2	293.912	0.261535	0.336813	0.784847
ENSMUSG00000039182.5	AW209491	275.22	0.261252	0.179585	0.594064
ENSMUSG00000032782.19	Cntrob	697.718	0.261216	0.0564445	0.31744
ENSMUSG00000038895.15	Zfp653	172.625	0.261119	0.141151	0.528553
ENSMUSG00000022346.14	Myc	1793.53	0.261048	0.09341	0.42991
ENSMUSG00000020212.13	Mdm1	265.499	0.260951	0.172618	0.583172
ENSMUSG00000032717.14	Mdfi	232.7	0.260919	0.173214	0.583846
ENSMUSG00000025645.8	Ccdc51	306.866	0.260871	0.0602019	0.32991
ENSMUSG00000025871.18	4833439L19Rik	978.793	0.260735	0.0111661	0.113066
ENSMUSG00000022856.8	Tmem41a	268.849	0.260631	0.212505	0.646321
ENSMUSG00000055976.5	Cldn23	393.377	0.260596	0.0752179	0.378992
ENSMUSG00000043866.10	Taf10	218.991	0.260504	0.101183	0.449508
ENSMUSG00000027326.13	Casc5	784.86	0.260239	0.33802	0.786451
ENSMUSG00000094410.7	Gm38394	246.408	0.260218	0.0753647	0.379585
ENSMUSG00000020330.16	Hmmr	948.561	0.260143	0.326308	0.775457
ENSMUSG00000021391.9	Cenpp	234.555	0.260103	0.340501	0.788735
ENSMUSG00000021054.5	Sgpp1	546.536	0.25974	0.0504378	0.296392
ENSMUSG00000052214.9	Opa3	898.324	0.25935	0.0363254	0.243572
ENSMUSG00000003531.14	Dgcr6	294.22	0.259103	0.0490258	0.291102
ENSMUSG00000037716.14	Ccdc33	204.028	0.258923	0.354926	0.801766
ENSMUSG00000021518.3	Ptdss1	1209.27	0.258903	0.0225025	0.179334
ENSMUSG00000029591.14	Ung	406.393	0.258712	0.131028	0.509381
ENSMUSG00000106022.1	NA	61.1194	0.25856	0.353272	0.800482
ENSMUSG00000075054.4	Yae1d1	155.445	0.25847	0.220066	0.657487
ENSMUSG00000033542.13	Arhgef5	2477.07	0.258429	0.0102301	0.107894
ENSMUSG00000041939.14	Mvk	283.249	0.258413	0.128135	0.504556
ENSMUSG00000068758.7	Il3ra	135.005	0.258092	0.247096	0.694213
ENSMUSG00000010517.7	Faf1	899.569	0.257794	0.0307507	0.218918
ENSMUSG00000038005.14	2700029M09Rik	382.383	0.257761	0.0940563	0.430821
ENSMUSG00000098318.7	NA	92.5796	0.257595	0.356539	0.802705
ENSMUSG00000022827.14	Rabl3	239.386	0.257283	0.114943	0.480048
ENSMUSG00000024277.14	Mapre2	317.133	0.257107	0.0871856	0.410966
ENSMUSG00000086370.8	NA	75.1683	0.256786	0.249005	0.696563
ENSMUSG00000031562.15	Dctd	419.086	0.256659	0.213521	0.648506
ENSMUSG00000029053.16	Prkcz	295.265	0.25655	0.0546481	0.310513
ENSMUSG00000036613.7	Tssc1	246.413	0.256545	0.22956	0.671126
ENSMUSG00000030551.13	Nr2f2	263.682	0.256034	0.242169	0.688247
ENSMUSG00000035547.14	Capn5	2841.96	0.255977	0.00388302	0.0539328
ENSMUSG00000002885.14	Adgre5	743.498	0.255842	0.173409	0.583967
ENSMUSG00000097375.2	NA	95.3863	0.255582	0.35251	0.799706
ENSMUSG00000028035.13	Dnajb4	430.708	0.255518	0.0639714	0.342267
ENSMUSG00000087370.2	Tmem170b	814.206	0.255477	0.223717	0.663112
ENSMUSG00000032359.14	Ctsh	1574.98	0.255378	0.0101389	0.107137
ENSMUSG00000025792.9	Slc25a10	748.489	0.255303	0.202685	0.628439
ENSMUSG00000035505.14	Cox18	178.211	0.255024	0.130312	0.508396
ENSMUSG00000020493.8	Prr11	729.096	0.254994	0.356291	0.802705
ENSMUSG00000022358.6	Fbxo32	485.774	0.25443	0.246762	0.694213
ENSMUSG00000063767.3	S100a7a	202.632	0.25391	0.354634	0.801547
ENSMUSG00000041926.15	Rnpep	838.732	0.253892	0.0280265	0.206014
ENSMUSG00000021400.6	Wrnip1	827.831	0.253878	0.0595502	0.327175
ENSMUSG00000025134.2	Alyref	550.403	0.253762	0.0459281	0.279622
ENSMUSG00000004642.13	Slbp	497.268	0.25373	0.0795606	0.390349
ENSMUSG00000018570.17	2810408A11Rik	245.577	0.253406	0.288204	0.740628
ENSMUSG00000030322.12	Mbd4	258.511	0.253024	0.105556	0.459404
ENSMUSG00000039153.16	Runx2	1327.77	0.253022	0.0573147	0.319745
ENSMUSG00000022456.15	37865	233.331	0.252972	0.288302	0.740628
ENSMUSG00000028536.12	2610528J11Rik	317.97	0.252899	0.105669	0.459775
ENSMUSG00000042606.9	Hirip3	417.56	0.252842	0.22115	0.658775
ENSMUSG00000038685.18	Rtel1	590.267	0.252698	0.112612	0.47666
ENSMUSG00000026600.12	Soat1	2037.45	0.252561	0.0279413	0.205847
ENSMUSG00000021506.7	Pitx1	708.376	0.252549	0.0163087	0.145569
ENSMUSG00000022123.8	Scel	1023.04	0.252533	0.179577	0.594064
ENSMUSG00000081669.1	NA	135.509	0.252249	0.158185	0.558904
ENSMUSG00000005125.12	Ndrg1	2006.96	0.252009	0.123556	0.496227
ENSMUSG00000029430.13	Ran	503.63	0.251993	0.0560313	0.315655
ENSMUSG00000014633.15	Cmc2	124.504	0.251921	0.213721	0.648627
ENSMUSG00000021266.16	Wars	1638.18	0.251907	0.088416	0.414678
ENSMUSG00000024613.16	Tcof1	951.967	0.251895	0.23101	0.672739
ENSMUSG00000086629.7	NA	71.7781	0.251651	0.300205	0.750643
ENSMUSG00000002983.16	Relb	1088.9	0.251328	0.00931541	0.101563
ENSMUSG00000044906.4	4930503L19Rik	91.0504	0.251067	0.297278	0.74754
ENSMUSG00000031167.16	Rbm3	233.029	0.251064	0.143142	0.531759
ENSMUSG00000081289.1	NA	290.098	0.250745	0.0718468	0.36826
ENSMUSG00000044702.13	Palb2	221.761	0.250456	0.236886	0.680649
ENSMUSG00000058331.14	Zfp85	78.0433	0.250283	0.286161	0.738343
ENSMUSG00000027635.15	Dsn1	387.315	0.250167	0.225213	0.664798
ENSMUSG00000091264.2	Smim13	183.587	0.250137	0.227424	0.668308
ENSMUSG00000036678.7	Aaas	569.377	0.250015	0.101129	0.449385
ENSMUSG00000032392.10	Parp16	319.495	0.249972	0.0843631	0.403353
ENSMUSG00000045763.7	Basp1	474.885	0.249968	0.281069	0.733698
ENSMUSG00000011179.7	Odc1	199.408	0.249914	0.183	0.599362
ENSMUSG00000010607.8	Pigyl	245.558	0.249827	0.133288	0.513333
ENSMUSG00000021709.14	Erbb2ip	3713.59	0.249802	0.0755323	0.380081
ENSMUSG00000033114.10	Slc35d2	229.58	0.2495	0.134679	0.516568
ENSMUSG00000021660.14	Btf3	263.925	0.24918	0.124478	0.497882
ENSMUSG00000063445.14	Nmral1	265.895	0.249175	0.2618	0.712895
ENSMUSG00000037563.14	Rps16	58.4048	0.248963	0.27166	0.725269
ENSMUSG00000026275.13	Ppp1r7	971.382	0.248818	0.128367	0.505109
ENSMUSG00000036352.16	Ubac1	361.772	0.248768	0.0601547	0.329761
ENSMUSG00000034413.14	Neurl1b	272.739	0.248702	0.333239	0.782364
ENSMUSG00000040711.7	Sh3pxd2b	1586.66	0.24869	0.157843	0.558718
ENSMUSG00000044072.14	Eml6	54.5486	0.248571	0.300498	0.75076
ENSMUSG00000021906.13	Oxnad1	468.547	0.248463	0.0870647	0.410676
ENSMUSG00000040734.14	Ppp1r13l	649.266	0.24837	0.0318584	0.223049
ENSMUSG00000032409.14	Atr	961.356	0.248334	0.0441959	0.273653
ENSMUSG00000030560.16	Ctsc	629.318	0.24831	0.320563	0.76964
ENSMUSG00000028064.17	Sema4a	1171.5	0.248237	0.175248	0.587543
ENSMUSG00000059482.15	2610301B20Rik	194.882	0.24802	0.171332	0.581751
ENSMUSG00000028496.17	Mllt3	1398.89	0.247901	0.039981	0.257157
ENSMUSG00000002803.13	Btbd6	329.619	0.247722	0.131025	0.509381
ENSMUSG00000021676.9	Iqgap2	771.171	0.247378	0.211999	0.645632
ENSMUSG00000093930.1	Hmgcs1	2319.78	0.247034	0.0854924	0.405929
ENSMUSG00000021537.8	Cetn3	525.83	0.24674	0.101524	0.450189
ENSMUSG00000021578.16	Ccdc127	1206.52	0.246651	0.0819297	0.396547
ENSMUSG00000041773.7	Enc1	2807.61	0.246637	0.00488599	0.0631618
ENSMUSG00000035376.9	Hacd2	620.844	0.246556	0.177574	0.591257
ENSMUSG00000037321.17	Tap1	673.357	0.246426	0.141989	0.529909
ENSMUSG00000018548.15	Trim37	829.076	0.246393	0.0680989	0.357054
ENSMUSG00000022476.7	Polr3h	312.883	0.245837	0.218347	0.655136
ENSMUSG00000032477.13	Cdc25a	775.746	0.245467	0.0339246	0.232196
ENSMUSG00000031901.12	Dus2	178.51	0.245458	0.166909	0.573045
ENSMUSG00000020758.15	Itgb4	3214.49	0.245375	0.0334225	0.230664
ENSMUSG00000021932.13	Rnaseh2b	305.602	0.245242	0.0929965	0.428485
ENSMUSG00000021892.14	Sh3bp5	316.36	0.244949	0.174123	0.585844
ENSMUSG00000036752.4	Tubb4b	674.155	0.244666	0.0588399	0.324821
ENSMUSG00000006445.3	Epha2	2143	0.244612	0.0135221	0.128706
ENSMUSG00000021619.5	Atg10	90.5569	0.244446	0.304796	0.755003
ENSMUSG00000073481.9	Marc2	951.125	0.244266	0.0123438	0.121414
ENSMUSG00000031969.15	Acad8	485.189	0.244241	0.103798	0.455479
ENSMUSG00000035365.15	Parpbp	323.27	0.243867	0.345241	0.793486
ENSMUSG00000031982.4	Arv1	163.77	0.24345	0.164882	0.569457
ENSMUSG00000046027.16	Stard5	776.071	0.242929	0.0226032	0.179682
ENSMUSG00000071041.4	NA	610.098	0.242843	0.0213629	0.173501
ENSMUSG00000039254.16	Pomt1	433.052	0.242826	0.0701546	0.364473
ENSMUSG00000003190.11	Bcl2l12	158.215	0.242638	0.192894	0.612706
ENSMUSG00000051343.11	Rab11fip5	1377.69	0.242619	0.206258	0.6351
ENSMUSG00000036918.15	Ttc7	752.663	0.242616	0.162382	0.565859
ENSMUSG00000043165.7	Lor	80.8527	0.242533	0.382581	0.823632
ENSMUSG00000085972.1	NA	164.614	0.242475	0.329043	0.778256
ENSMUSG00000029156.11	Sgcb	180.419	0.242474	0.160019	0.561958
ENSMUSG00000032306.14	Mpi	508.975	0.242239	0.0590984	0.325703
ENSMUSG00000001786.14	Fbxo7	538.634	0.242233	0.0565404	0.317763
ENSMUSG00000014907.9	Naf1	407.884	0.242196	0.138956	0.525463
ENSMUSG00000041153.9	Osgin2	230.67	0.242079	0.13443	0.516159
ENSMUSG00000034255.17	Arhgap27	1740.51	0.242075	0.114076	0.479068
ENSMUSG00000031604.10	Msmo1	1285.33	0.242047	0.0491041	0.291357
ENSMUSG00000016319.3	Slc25a5	513.9	0.241981	0.0450483	0.276543
ENSMUSG00000042082.6	Arsb	476.315	0.24195	0.139107	0.525674
ENSMUSG00000041548.4	Hspb8	290	0.241827	0.29427	0.745252
ENSMUSG00000011257.19	Pabpc4	370.771	0.241723	0.138668	0.525112
ENSMUSG00000029860.16	Zyx	1474.83	0.241505	0.0502278	0.295368
ENSMUSG00000061024.8	Rrs1	554.028	0.241448	0.185013	0.60122
ENSMUSG00000029376.8	Mthfd2l	220.662	0.241306	0.135622	0.518204
ENSMUSG00000051444.9	Bbs12	163.314	0.241225	0.192635	0.612425
ENSMUSG00000008859.7	Rala	857.724	0.241002	0.127547	0.503851
ENSMUSG00000051319.6	1500011K16Rik	181.696	0.240985	0.219241	0.656142
ENSMUSG00000034165.16	Ccnd3	531.165	0.240835	0.0529554	0.305117
ENSMUSG00000030706.16	Mrpl48	184.511	0.240655	0.150109	0.544865
ENSMUSG00000000253.12	Gmpr	209.927	0.240606	0.341161	0.789216
ENSMUSG00000040688.16	Tbl3	713.089	0.240369	0.212434	0.646321
ENSMUSG00000079435.9	Rpl36a	87.881	0.24032	0.275194	0.728272
ENSMUSG00000076431.4	Sox4	1578.64	0.239899	0.0466324	0.282069
ENSMUSG00000038482.10	Tfdp1	428.555	0.239661	0.147262	0.539816
ENSMUSG00000024378.9	Stard4	2475.01	0.239532	0.00328345	0.0479721
ENSMUSG00000026806.15	Ddx31	380.896	0.239408	0.142026	0.529909
ENSMUSG00000030493.13	Faap24	110.883	0.239284	0.23718	0.680989
ENSMUSG00000105949.1	NA	77.1375	0.238987	0.329493	0.778454
ENSMUSG00000029676.15	Pot1a	589.545	0.238817	0.0338702	0.232196
ENSMUSG00000031922.12	Cep57	911.923	0.238788	0.146823	0.53944
ENSMUSG00000012422.14	Tmem167	832.951	0.238615	0.130784	0.509381
ENSMUSG00000006390.15	Elovl1	695.365	0.238568	0.0525272	0.303496
ENSMUSG00000027905.15	Ddx20	484.172	0.238551	0.148615	0.541627
ENSMUSG00000032251.12	Irak1bp1	61.8854	0.238401	0.329168	0.778294
ENSMUSG00000021665.7	Hexb	528.829	0.238168	0.107925	0.464621
ENSMUSG00000028403.15	Zdhhc21	2192.21	0.238014	0.0321214	0.224414
ENSMUSG00000064138.13	Fam172a	491.853	0.237966	0.230281	0.671705
ENSMUSG00000060032.6	H2afj	239.091	0.237905	0.211223	0.644491
ENSMUSG00000020027.18	Socs2	752.371	0.237745	0.0205683	0.16913
ENSMUSG00000022629.16	Kif21a	795.378	0.237742	0.0763324	0.382241
ENSMUSG00000025283.15	Sat1	857.028	0.237676	0.144979	0.535248
ENSMUSG00000014786.7	Slc9a5	78.5298	0.237662	0.346456	0.79451
ENSMUSG00000090115.7	Usp49	231.71	0.23763	0.220465	0.65798
ENSMUSG00000024960.8	Plcb3	2306.64	0.23743	0.0232781	0.182757
ENSMUSG00000056148.8	Rdh9	279.059	0.237327	0.167766	0.574726
ENSMUSG00000075254.11	Heg1	129.796	0.237318	0.277842	0.730951
ENSMUSG00000034855.13	Cxcl10	79.1102	0.237317	0.394124	0.83255
ENSMUSG00000035142.18	Nubpl	163.093	0.237202	0.172365	0.582789
ENSMUSG00000038286.10	Bphl	282.045	0.23719	0.125341	0.499453
ENSMUSG00000062995.12	Ica1	518.552	0.237044	0.0420983	0.264945
ENSMUSG00000027649.15	Ctnnbl1	457.079	0.236823	0.135967	0.518909
ENSMUSG00000022571.8	Pycrl	379.88	0.236504	0.0733063	0.373091
ENSMUSG00000024659.14	Anxa1	1854.5	0.236415	0.0131415	0.126543
ENSMUSG00000040613.14	Apobec1	120.874	0.236212	0.371335	0.814687
ENSMUSG00000029471.13	Camkk2	51.7959	0.235961	0.399625	0.836827
ENSMUSG00000032193.8	Ldlr	1777.05	0.235883	0.0230326	0.181355
ENSMUSG00000106019.1	NA	61.6311	0.235856	0.317263	0.76644
ENSMUSG00000032786.14	Alas1	927.176	0.235748	0.0621138	0.336697
ENSMUSG00000032358.12	Fam83b	825.71	0.235709	0.16949	0.577578
ENSMUSG00000025766.14	D3Ertd751e	181.967	0.235611	0.278099	0.731014
ENSMUSG00000083640.1	NA	58.6921	0.235243	0.315749	0.764304
ENSMUSG00000038323.3	1700066M21Rik	246.98	0.235085	0.184942	0.601155
ENSMUSG00000044770.14	Scml4	832.93	0.234896	0.262694	0.713627
ENSMUSG00000044847.13	Lsm11	392.481	0.234655	0.0763098	0.382241
ENSMUSG00000033105.12	Lss	916.078	0.234539	0.0614625	0.334927
ENSMUSG00000021486.6	Prelid1	586.446	0.234447	0.0564987	0.317637
ENSMUSG00000025525.12	Apool	307.481	0.23436	0.188161	0.606431
ENSMUSG00000040690.15	Col16a1	959.387	0.234215	0.403761	0.838025
ENSMUSG00000033102.14	Cdc14b	770.953	0.234068	0.124135	0.497614
ENSMUSG00000044155.11	Lsm8	581.519	0.233208	0.0501694	0.295235
ENSMUSG00000041075.8	Fzd7	1365.62	0.232845	0.0394942	0.255696
ENSMUSG00000026020.9	Nop58	1453.75	0.232441	0.0420469	0.264921
ENSMUSG00000035351.15	Nup37	362.694	0.232307	0.0705462	0.365408
ENSMUSG00000048924.13	Ccdc125	318.648	0.232012	0.238818	0.683102
ENSMUSG00000038827.11	Fam206a	538.06	0.231934	0.171306	0.581751
ENSMUSG00000063275.15	Hacd1	198.06	0.231729	0.173225	0.583846
ENSMUSG00000036285.10	Noa1	499.091	0.231643	0.215449	0.650526
ENSMUSG00000052539.15	Magi3	1401.98	0.231615	0.104557	0.456803
ENSMUSG00000020669.15	Sh3yl1	481.319	0.231557	0.101732	0.450504
ENSMUSG00000040010.10	Slc7a5	836.448	0.231551	0.284063	0.735657
ENSMUSG00000006494.11	Pdk1	2680.5	0.231532	0.0089832	0.0987853
ENSMUSG00000032000.17	Birc3	779.448	0.231489	0.0917998	0.424632
ENSMUSG00000018428.15	Akap1	694.203	0.231428	0.211549	0.645027
ENSMUSG00000057110.15	Cntrl	1434.57	0.23138	0.185366	0.601947
ENSMUSG00000039509.7	Nup133	920.993	0.231368	0.168788	0.576114
ENSMUSG00000020580.9	Rock2	3573.75	0.231347	0.0172125	0.150541
ENSMUSG00000005980.15	Dnase1	55.1197	0.230934	0.395718	0.833423
ENSMUSG00000021177.15	Tdp1	394.587	0.230541	0.117495	0.485753
ENSMUSG00000026547.15	Tagln2	1511.4	0.230347	0.0462282	0.280554
ENSMUSG00000061607.14	Mdc1	2184.32	0.230256	0.0389502	0.254419
ENSMUSG00000021361.6	Tmem14c	481.148	0.230146	0.102077	0.45117
ENSMUSG00000059325.14	Hopx	581.128	0.230022	0.0394224	0.255626
ENSMUSG00000039431.16	Mtmr7	651.484	0.229959	0.0619431	0.336173
ENSMUSG00000029388.14	Eif2b1	639.003	0.229673	0.102421	0.451663
ENSMUSG00000108414.1	NA	603.551	0.229614	0.145551	0.536507
ENSMUSG00000042857.2	Gm9776	164.153	0.229602	0.251588	0.700176
ENSMUSG00000092118.1	Fancf	92.2955	0.229474	0.321941	0.771527
ENSMUSG00000031584.16	Gsr	1445.4	0.229385	0.0586534	0.324443
ENSMUSG00000064373.11	Sepp1	778.828	0.229201	0.30716	0.757113
ENSMUSG00000058056.15	Palld	235.368	0.229067	0.203895	0.63059
ENSMUSG00000031004.7	Mki67	4517.76	0.229023	0.412965	0.84502
ENSMUSG00000028337.14	Coro2a	1571.34	0.228967	0.0259286	0.195617
ENSMUSG00000029036.18	Atad3a	756.423	0.228884	0.16844	0.575717
ENSMUSG00000022704.15	Qtrtd1	562.758	0.228734	0.164195	0.568426
ENSMUSG00000052942.13	Glis3	802.43	0.228507	0.270228	0.723136
ENSMUSG00000048087.5	Gm4737	130.058	0.228482	0.255683	0.703853
ENSMUSG00000000916.15	Nsun5	304.309	0.228376	0.251554	0.700176
ENSMUSG00000024816.12	Frmd8	1008.93	0.228369	0.0816885	0.395844
ENSMUSG00000036882.6	Arhgap33	152.292	0.228272	0.394774	0.833137
ENSMUSG00000046093.9	Hpcal4	199.505	0.228217	0.351445	0.798478
ENSMUSG00000047832.8	Cdca4	841.087	0.22811	0.0508649	0.298259
ENSMUSG00000020089.8	Ppa1	572.259	0.227993	0.110381	0.470717
ENSMUSG00000000958.9	Slc7a7	592.304	0.227897	0.136248	0.519274
ENSMUSG00000053332.13	NA	826.629	0.227838	0.0534257	0.306478
ENSMUSG00000028603.15	Scp2	924.717	0.227783	0.0551881	0.312291
ENSMUSG00000021546.17	Hnrnpk	1505.1	0.227745	0.0401689	0.257652
ENSMUSG00000070699.4	Sars2	189.405	0.227677	0.296163	0.746744
ENSMUSG00000025451.15	Paip1	1260.54	0.227676	0.0600898	0.329625
ENSMUSG00000029703.10	Lrwd1	654.578	0.227453	0.0694672	0.361699
ENSMUSG00000021079.15	Timm9	262.276	0.227315	0.161046	0.563923
ENSMUSG00000078348.4	Sf3b5	378.6	0.227276	0.119543	0.489176
ENSMUSG00000036304.13	Zdhhc23	69.8541	0.227167	0.387918	0.827672
ENSMUSG00000020656.15	Grhl1	261.825	0.227102	0.293367	0.745252
ENSMUSG00000063200.3	Nol7	613.687	0.227044	0.1004	0.447446
ENSMUSG00000026605.14	Cenpf	2226.57	0.226835	0.39499	0.833365
ENSMUSG00000006720.16	Zfp184	173.526	0.226561	0.324261	0.773602
ENSMUSG00000020608.6	Smc6	1192.84	0.226501	0.0793907	0.389979
ENSMUSG00000104960.1	NA	204.04	0.226466	0.137048	0.520757
ENSMUSG00000006360.11	Crip1	320.146	0.226161	0.118465	0.487545
ENSMUSG00000031016.8	Wee1	421.144	0.22616	0.228456	0.669578
ENSMUSG00000005225.15	Plekha8	712.844	0.226159	0.0369045	0.246254
ENSMUSG00000047879.16	Usp14	1266.77	0.226063	0.0342353	0.233387
ENSMUSG00000078651.8	Aoc2	237.093	0.226046	0.243918	0.690747
ENSMUSG00000054855.13	Rnd1	340.821	0.225952	0.126165	0.50147
ENSMUSG00000025962.15	Fastkd2	417.852	0.225732	0.158438	0.559142
ENSMUSG00000034947.13	Tmem106a	142.915	0.225653	0.280878	0.73343
ENSMUSG00000039221.10	Rpl22l1	218.482	0.225484	0.294778	0.745418
ENSMUSG00000004540.7	Psg17	54.4734	0.225414	0.421986	0.848758
ENSMUSG00000042155.3	Klhl23	84.1839	0.225172	0.404572	0.83842
ENSMUSG00000066057.6	NA	97.1593	0.225093	0.342975	0.79113
ENSMUSG00000034993.7	Vat1	1131.94	0.22493	0.022941	0.181151
ENSMUSG00000090137.8	Uba52	109.86	0.224862	0.288889	0.741012
ENSMUSG00000081070.1	NA	108.797	0.224836	0.256137	0.704398
ENSMUSG00000028655.11	Mfsd2a	620.547	0.224791	0.385191	0.825732
ENSMUSG00000042210.16	Abhd14a	226.462	0.224596	0.189143	0.607284
ENSMUSG00000026365.15	Cfh	401.812	0.224376	0.375757	0.817816
ENSMUSG00000006732.14	Mettl1	186.099	0.224374	0.247029	0.694213
ENSMUSG00000027078.14	Ube2l6	254.959	0.223654	0.21382	0.648696
ENSMUSG00000026238.14	Ptma	236.264	0.223537	0.17745	0.590962
ENSMUSG00000085642.7	NA	96.0841	0.223464	0.285513	0.737248
ENSMUSG00000030760.14	Acer3	869.39	0.223416	0.0378741	0.249893
ENSMUSG00000024800.7	Rpp30	257.574	0.223368	0.164734	0.569325
ENSMUSG00000033918.15	Parl	372.554	0.223361	0.165493	0.570557
ENSMUSG00000018848.4	Rars	1380.05	0.223134	0.0215756	0.174627
ENSMUSG00000105928.1	NA	172.853	0.223036	0.277334	0.730835
ENSMUSG00000041840.7	Haus1	289.084	0.222693	0.193333	0.61351
ENSMUSG00000055553.16	Kxd1	581.332	0.222605	0.104185	0.456329
ENSMUSG00000030619.8	Eed	679.112	0.222601	0.0404305	0.257989
ENSMUSG00000039356.15	Exosc2	440.558	0.2225	0.199527	0.623968
ENSMUSG00000034127.14	Tspan8	1244.44	0.222413	0.030045	0.215569
ENSMUSG00000079555.2	Haus3	400.099	0.222388	0.112949	0.477101
ENSMUSG00000054766.13	Set	648.184	0.222243	0.0643776	0.343324
ENSMUSG00000034327.17	Kctd9	606.582	0.222207	0.116872	0.484371
ENSMUSG00000022544.13	Eef2kmt	371.738	0.22216	0.131735	0.511048
ENSMUSG00000021018.7	Polr2h	189.994	0.222025	0.217422	0.653732
ENSMUSG00000036315.13	Znrd1	242.601	0.221987	0.129591	0.50705
ENSMUSG00000030008.9	Pradc1	74.9346	0.221699	0.37031	0.813725
ENSMUSG00000033577.18	Myo6	3385.01	0.221578	0.00704661	0.0825246
ENSMUSG00000046727.12	Cystm1	792.768	0.221392	0.0314766	0.222103
ENSMUSG00000057531.13	Dtnbp1	232.195	0.221388	0.239822	0.684525
ENSMUSG00000038388.14	Mpp6	760.62	0.220937	0.111515	0.473956
ENSMUSG00000052914.4	Cyp2j6	615.58	0.220769	0.182258	0.598276
ENSMUSG00000009566.12	Fpgs	292.16	0.220312	0.285085	0.736951
ENSMUSG00000038866.15	Zcchc2	1228.72	0.220271	0.0247416	0.190085
ENSMUSG00000019066.13	Rab3d	1202.95	0.220072	0.129744	0.507227
ENSMUSG00000026799.15	Med27	119.864	0.21978	0.323202	0.772589
ENSMUSG00000046111.16	Cep295	764.353	0.219587	0.0938035	0.43052
ENSMUSG00000018362.14	Kpna2	86.2945	0.219526	0.368717	0.812231
ENSMUSG00000103439.1	NA	55.2838	0.219469	0.375572	0.817816
ENSMUSG00000012483.4	Rpa3	217.877	0.219314	0.233391	0.676635
ENSMUSG00000030790.14	Adm	310.813	0.219128	0.405621	0.839299
ENSMUSG00000046694.6	Fam46b	483.65	0.219127	0.26102	0.712182
ENSMUSG00000050002.13	Idnk	199.957	0.219089	0.151886	0.547379
ENSMUSG00000029648.13	Flt1	7076.38	0.218968	0.116265	0.482893
ENSMUSG00000078816.9	Prkcg	54.952	0.218949	0.385656	0.825732
ENSMUSG00000001467.5	Cyp51	2587.66	0.21891	0.0882599	0.414299
ENSMUSG00000044921.4	Rassf9	1447.27	0.218894	0.024995	0.191053
ENSMUSG00000003032.8	Klf4	1052.17	0.218865	0.0840293	0.402476
ENSMUSG00000031371.14	Haus7	305.312	0.218843	0.193743	0.614458
ENSMUSG00000049230.8	Gm9833	139.787	0.218839	0.291476	0.74449
ENSMUSG00000042743.13	Sgtb	309.594	0.21868	0.328184	0.777209
ENSMUSG00000025278.8	Flnb	7152.53	0.21854	0.0177083	0.153332
ENSMUSG00000032245.12	Cln6	960.655	0.217294	0.0516227	0.300359
ENSMUSG00000099902.1	NA	140.439	0.217239	0.22588	0.665337
ENSMUSG00000021413.8	Prpf4b	1650.52	0.216888	0.0974014	0.440657
ENSMUSG00000025779.10	Ly96	89.3705	0.216816	0.312615	0.762246
ENSMUSG00000035842.9	Ddx11	764.307	0.21669	0.0488712	0.290721
ENSMUSG00000017978.18	Cadps2	106.437	0.216655	0.440374	0.862
ENSMUSG00000015961.8	Adss	1419.1	0.216552	0.0845736	0.403502
ENSMUSG00000016984.7	Etaa1	451.611	0.216511	0.108961	0.466737
ENSMUSG00000035172.15	Plekhh3	531.134	0.216436	0.109131	0.466958
ENSMUSG00000023953.8	Polh	585.853	0.216139	0.125475	0.499568
ENSMUSG00000026819.15	Slc25a25	726.335	0.216068	0.106018	0.46057
ENSMUSG00000029817.11	Tra2a	1492	0.215818	0.0788596	0.389033
ENSMUSG00000074141.12	Il4i1	1233.23	0.215806	0.0341194	0.232947
ENSMUSG00000054889.9	Dsp	5555.73	0.215771	0.176554	0.589764
ENSMUSG00000038612.16	Mcl1	2606.16	0.215625	0.0563208	0.316961
ENSMUSG00000027079.15	Clp1	378.899	0.215482	0.158384	0.559142
ENSMUSG00000022394.14	L3mbtl2	402.477	0.215322	0.125355	0.499453
ENSMUSG00000060073.9	Psma3	220.997	0.215282	0.244852	0.691996
ENSMUSG00000025185.14	Loxl4	591.028	0.21528	0.416836	0.845857
ENSMUSG00000102780.1	NA	63.6288	0.214991	0.37662	0.818174
ENSMUSG00000024007.14	Ppil1	523.563	0.214938	0.157994	0.558904
ENSMUSG00000063931.14	Pepd	684.195	0.214763	0.224681	0.664058
ENSMUSG00000058600.13	Rpl30	322.793	0.214645	0.188853	0.607236
ENSMUSG00000007589.8	Tinf2	544.402	0.214615	0.0830432	0.399707
ENSMUSG00000022074.5	Tnfrsf10b	315.588	0.214559	0.200986	0.625572
ENSMUSG00000042419.8	Nfkbil1	348.353	0.214479	0.17888	0.593043
ENSMUSG00000031430.8	Vsig1	243.698	0.214453	0.441425	0.862359
ENSMUSG00000031778.12	Cx3cl1	2502.27	0.214421	0.192517	0.612425
[truncated: 10,551 more rows]

## Sheet: Table S3
Table S3	Differential gene expression analysis (RNA sequencing) of sorted Epcam-positive tumor cells from control and Sfrp1-expressing subcutaneous tumors (Rag1 mice).
Ensembl gene ID	gene name	mean normalized counts	fold change (log2)	p-value	adj. p-value
ENSMUSG00000031548.7	Sfrp1	502.729	5.78012	4.15e-132	7.89e-128
ENSMUSG00000004098.7	Col5a3	205.149	3.57644	2.63e-41	8.34e-38
ENSMUSG00000032011.4	Thy1	68.7728	3.37976	3.47e-26	2.2e-23
ENSMUSG00000074003.4	Gucy2d	57.751	3.30736	1.66e-20	5.66e-18
ENSMUSG00000026837.15	Col5a1	284.543	3.22079	1.78e-40	4.85e-37
ENSMUSG00000016494.9	Cd34	258.593	3.18958	8.2e-33	9.75e-30
ENSMUSG00000029096.15	Htra3	199.528	3.15193	6.77e-36	1.17e-32
ENSMUSG00000025784.4	Clec3b	139.524	3.11396	3.03e-20	9.96e-18
ENSMUSG00000020241.13	Col6a2	333.659	3.07633	2.8e-30	2.54e-27
ENSMUSG00000038721.8	Hoxb7	55.231	3.07461	1.6e-16	3.19e-14
ENSMUSG00000020467.15	Efemp1	128.304	3.06152	4.14e-16	7.36e-14
ENSMUSG00000074743.4	Thbd	121.374	2.96627	7.82e-25	4.25e-22
ENSMUSG00000036446.4	Lum	228.782	2.95563	4.1e-23	1.73e-20
ENSMUSG00000061353.11	Cxcl12	65.6509	2.92931	1.63e-18	4.37e-16
ENSMUSG00000056481.6	Cd248	202.122	2.9257	1.09e-23	5.17e-21
ENSMUSG00000030116.14	Mfap5	141.744	2.88811	1.48e-28	1.13e-25
ENSMUSG00000030787.3	Lyve1	193.843	2.87716	1.92e-32	2.15e-29
ENSMUSG00000028341.9	Nr4a3	182.314	2.87218	9.23e-16	1.53e-13
ENSMUSG00000024011.16	Pi16	403.008	2.86815	3.23e-18	8.3e-16
ENSMUSG00000001119.7	Col6a1	371.742	2.86714	8.53e-30	7.06e-27
ENSMUSG00000051906.14	Cd209f	74.7838	2.73242	6.79e-18	1.7e-15
ENSMUSG00000019899.15	Lama2	118.96	2.69734	6.34e-16	1.07e-13
ENSMUSG00000022032.14	Scara5	152.647	2.68892	1.01e-13	1.24e-11
ENSMUSG00000026938.10	Fcna	148.804	2.68116	2.38e-17	5.37e-15
ENSMUSG00000026042.16	Col5a2	372.382	2.64534	1.53e-23	6.76e-21
ENSMUSG00000019929.15	Dcn	536.455	2.59787	1.66e-16	3.26e-14
ENSMUSG00000047238.4	Mageh1	61.052	2.56516	7.86e-13	8.31e-11
ENSMUSG00000048126.16	Col6a3	302.003	2.55239	9.88e-20	3.13e-17
ENSMUSG00000021268.17	NA	78.9905	2.54865	1.11e-14	1.6e-12
ENSMUSG00000064080.12	Fbln2	338.053	2.50866	3.32e-28	2.43e-25
ENSMUSG00000029661.16	Col1a2	1486.61	2.49888	4.57e-35	7.25e-32
ENSMUSG00000027204.13	Fbn1	897.602	2.4942	6.27e-14	8.06e-12
ENSMUSG00000025701.12	Alox5	64.9021	2.49057	1.28e-15	2.07e-13
ENSMUSG00000022122.14	Ednrb	103.396	2.46972	4.15e-22	1.58e-19
ENSMUSG00000048621.3	Gm6377	169.932	2.45131	1.01e-18	2.78e-16
ENSMUSG00000027408.7	Cpxm1	179.214	2.44184	1.34e-25	7.48e-23
ENSMUSG00000019278.4	Dpep1	78.3099	2.42381	2.24e-10	1.49e-08
ENSMUSG00000027004.3	Frzb	1033.2	2.41913	7.89e-27	5.18e-24
ENSMUSG00000001506.10	Col1a1	1465.14	2.41142	2.95e-37	5.61e-34
ENSMUSG00000043613.7	Mmp3	80.8113	2.40679	4.38e-11	3.35e-09
ENSMUSG00000056427.10	Slit3	82.2165	2.3967	1.86e-10	1.24e-08
ENSMUSG00000026674.9	Ddr2	132.418	2.38622	1.18e-11	1.01e-09
ENSMUSG00000021750.15	Fam107a	167.76	2.37357	2.12e-17	4.96e-15
ENSMUSG00000069515.5	Lyz1	187.539	2.36776	8.72e-18	2.16e-15
ENSMUSG00000036545.8	Adamts2	164.779	2.3572	8.77e-22	3.21e-19
ENSMUSG00000075254.11	Heg1	137.767	2.33096	1.81e-15	2.87e-13
ENSMUSG00000079018.10	Ly6c1	57.7812	2.32639	3.11e-11	2.44e-09
ENSMUSG00000032334.9	Loxl1	177.729	2.2682	1.71e-18	4.53e-16
ENSMUSG00000000184.12	Ccnd2	902.881	2.26257	3.64e-13	4.07e-11
ENSMUSG00000026043.18	Col3a1	2276.6	2.25869	2.4e-17	5.37e-15
ENSMUSG00000028339.17	Col15a1	231.768	2.23457	2.79e-24	1.43e-21
ENSMUSG00000000318.16	Clec10a	109.149	2.21794	2.51e-16	4.72e-14
ENSMUSG00000046213.9	Cym	62.7384	2.20442	2.69e-08	1.15e-06
ENSMUSG00000020090.7	Npffr1	588.986	2.19175	6.06e-17	1.28e-14
ENSMUSG00000033327.16	Tnxb	443.097	2.18572	7.63e-08	2.98e-06
ENSMUSG00000031740.7	Mmp2	598.324	2.18064	4.12e-38	8.7e-35
ENSMUSG00000007655.16	Cav1	55.8035	2.15859	3.17e-14	4.19e-12
ENSMUSG00000054203.7	Ifi205	52.5892	2.15565	1.27e-09	7.19e-08
ENSMUSG00000026586.16	Prrx1	63.2846	2.15415	5e-08	2.03e-06
ENSMUSG00000021298.7	Gpr132	77.2976	2.14274	7.22e-14	9.16e-12
ENSMUSG00000072941.5	Sod3	73.0317	2.13377	7.58e-10	4.54e-08
ENSMUSG00000038702.6	Dsel	97.014	2.09674	1.16e-14	1.66e-12
ENSMUSG00000075602.10	Ly6a	138.203	2.0748	1.82e-13	2.14e-11
ENSMUSG00000018339.11	Gpx3	248.804	2.06643	7.39e-12	6.6e-10
ENSMUSG00000032691.14	Nlrp3	201.256	2.0661	3.93e-17	8.6e-15
ENSMUSG00000034041.4	Lyl1	116.754	2.06555	2.47e-18	6.45e-16
ENSMUSG00000045404.15	Kcnk13	63.5193	2.05342	3.31e-11	2.58e-09
ENSMUSG00000021390.5	Ogn	148.438	2.05331	1.65e-07	5.92e-06
ENSMUSG00000028111.4	Ctsk	85.4136	2.0494	2.64e-10	1.72e-08
ENSMUSG00000043832.13	Clec4a3	95.1927	2.04806	1.02e-16	2.13e-14
ENSMUSG00000025355.6	Mmp19	85.3087	2.02699	5.67e-15	8.63e-13
ENSMUSG00000039252.11	Lgi2	396.515	2.02623	7.93e-39	1.89e-35
ENSMUSG00000028583.14	Pdpn	123.32	2.02606	5.39e-15	8.27e-13
ENSMUSG00000026365.15	Cfh	271.318	2.02455	2.42e-34	3.07e-31
ENSMUSG00000036931.14	Nfkbid	258.938	2.02399	1.52e-30	1.45e-27
ENSMUSG00000037206.14	Islr	140.904	2.02231	3.06e-11	2.42e-09
ENSMUSG00000076617.9	Ighm	152.826	2.00736	3.01e-23	1.3e-20
ENSMUSG00000031216.13	Stard8	199.828	2.00077	5.5e-17	1.18e-14
ENSMUSG00000031377.11	Bmx	876.541	1.99217	1.77e-56	1.12e-52
ENSMUSG00000022123.8	Scel	1108.08	1.98525	1.36e-23	6.16e-21
ENSMUSG00000061100.3	Retnla	325.915	1.96988	1.04e-25	6.03e-23
ENSMUSG00000032487.8	Ptgs2	310.36	1.95976	2.66e-10	1.72e-08
ENSMUSG00000023078.6	Cxcl13	69.9618	1.95372	6.51e-11	4.8e-09
ENSMUSG00000055172.10	C1ra	75.6102	1.95118	3.3e-09	1.73e-07
ENSMUSG00000050248.11	Evc2	115.257	1.93365	9.59e-08	3.68e-06
ENSMUSG00000030474.9	Siglece	90.9099	1.93351	6.35e-16	1.07e-13
ENSMUSG00000020363.6	Gfpt2	95.6332	1.91603	5.34e-11	4e-09
ENSMUSG00000043953.12	Ccrl2	429.2	1.91128	4.35e-12	4.14e-10
ENSMUSG00000030162.14	Olr1	52.9309	1.90806	5.59e-08	2.25e-06
ENSMUSG00000037362.8	Nov	57.42	1.9077	1.08e-08	5.11e-07
ENSMUSG00000033450.7	Tagap	74.7429	1.90536	1.96e-11	1.6e-09
ENSMUSG00000008845.9	Cd163	179.589	1.9052	6.45e-16	1.08e-13
ENSMUSG00000009772.15	Nuak2	67.8149	1.90331	4.18e-10	2.62e-08
ENSMUSG00000026315.13	Serpinb8	94.9738	1.89449	2.2e-12	2.19e-10
ENSMUSG00000041120.6	Nbl1	79.0617	1.89414	1.68e-09	9.16e-08
ENSMUSG00000055435.6	Maf	433.619	1.89132	4.14e-27	2.92e-24
ENSMUSG00000026360.9	Rgs2	403.057	1.88986	2.13e-13	2.49e-11
ENSMUSG00000021886.6	Gpr65	164.472	1.88606	2.44e-20	8.16e-18
ENSMUSG00000028047.11	Thbs3	79.2519	1.88343	1.05e-12	1.1e-10
ENSMUSG00000030737.16	Slco2b1	242.423	1.88167	8.13e-30	7.03e-27
ENSMUSG00000059089.4	Fcgr4	111.653	1.88011	4.29e-09	2.2e-07
ENSMUSG00000056069.8	Fam105a	188.976	1.87995	1.03e-19	3.21e-17
ENSMUSG00000039377.7	Hlx	58.6406	1.87989	2.25e-10	1.49e-08
ENSMUSG00000027399.1	Il1a	190.974	1.87165	7.95e-19	2.22e-16
ENSMUSG00000069045.11	Ddx3y	665.109	1.86364	1.03e-18	2.8e-16
ENSMUSG00000031290.14	Lrch2	302.946	1.86231	5.68e-10	3.48e-08
ENSMUSG00000040907.15	Atp1a3	109.866	1.85927	1.37e-10	9.48e-09
ENSMUSG00000026574.5	Dpt	217.468	1.85792	6.72e-06	0.000166352
ENSMUSG00000016756.16	Cmah	52.0344	1.85112	1.04e-06	3.14e-05
ENSMUSG00000040447.15	Spns2	312.712	1.85044	2.82e-14	3.78e-12
ENSMUSG00000040229.11	Gpr34	114.394	1.84966	5.23e-17	1.13e-14
ENSMUSG00000023224.12	Serping1	298.348	1.84462	5.87e-09	2.93e-07
ENSMUSG00000020695.14	Mrc2	113.805	1.83845	1.63e-12	1.67e-10
ENSMUSG00000037731.5	Themis2	190.576	1.83772	3.46e-16	6.3e-14
ENSMUSG00000053318.7	Slamf8	56.6995	1.83519	1.66e-09	9.12e-08
ENSMUSG00000027339.15	Rassf2	220.753	1.83263	1.57e-13	1.89e-11
ENSMUSG00000030921.16	Trim30a	187.189	1.83043	4.14e-11	3.19e-09
ENSMUSG00000058755.3	Osm	179.075	1.82932	5.69e-09	2.85e-07
ENSMUSG00000029061.2	Mmp23	59.7015	1.82771	3.41e-09	1.78e-07
ENSMUSG00000018930.3	Ccl4	206.379	1.8275	2.47e-14	3.34e-12
ENSMUSG00000032725.9	Folr2	236.145	1.82736	6.17e-19	1.75e-16
ENSMUSG00000037860.15	Aim2	125.765	1.82595	8.09e-12	7.09e-10
ENSMUSG00000030187.15	Klra2	61.4034	1.82594	3.02e-10	1.93e-08
ENSMUSG00000039497.7	Dse	177.244	1.82592	2.93e-16	5.47e-14
ENSMUSG00000028270.12	Gbp2	64.8668	1.818	8.91e-08	3.45e-06
ENSMUSG00000034792.8	Gna15	59.7053	1.81695	8.62e-10	5.09e-08
ENSMUSG00000025150.10	Cbr2	134.005	1.81629	7.26e-12	6.58e-10
ENSMUSG00000029082.17	Bst1	62.7186	1.81172	4e-07	1.32e-05
ENSMUSG00000037868.15	Egr2	529.754	1.80852	2.93e-12	2.88e-10
ENSMUSG00000042265.13	Trem1	61.0487	1.80556	1.85e-07	6.59e-06
ENSMUSG00000071656.6	Lrrn4cl	79.6797	1.80369	2.36e-08	1.02e-06
ENSMUSG00000055653.13	Gpc3	143.156	1.80333	2.76e-10	1.78e-08
ENSMUSG00000028268.14	Gbp3	79.4212	1.80099	6.15e-09	3.06e-07
ENSMUSG00000037379.7	Spon2	100.651	1.79803	5.79e-11	4.32e-09
ENSMUSG00000029925.13	Tbxas1	269.258	1.79678	1.31e-24	6.94e-22
ENSMUSG00000017754.13	Pltp	333.834	1.79548	4.41e-15	6.82e-13
ENSMUSG00000033730.3	Egr3	447.881	1.79252	1.41e-14	1.98e-12
ENSMUSG00000040345.9	Arhgap9	98.3944	1.78247	6.61e-09	3.25e-07
ENSMUSG00000027398.13	Il1b	550.36	1.78077	2.2e-17	5.06e-15
ENSMUSG00000030589.15	Rasgrp4	78.538	1.77903	3.15e-10	2.01e-08
ENSMUSG00000058571.10	Gpc6	162.53	1.77872	3.47e-06	9.28e-05
ENSMUSG00000022901.13	Cd86	135.516	1.7783	1.29e-12	1.33e-10
ENSMUSG00000086825.1	NA	92.208	1.77454	1.06e-11	9.05e-10
ENSMUSG00000013707.3	Tnfaip8l2	97.3091	1.77159	2.94e-11	2.33e-09
ENSMUSG00000048373.8	Fgfbp1	72.55	1.76981	7.19e-11	5.28e-09
ENSMUSG00000052889.11	Prkcb	109.107	1.7693	1.89e-11	1.56e-09
ENSMUSG00000032089.16	Il10ra	354.382	1.75984	5.47e-16	9.47e-14
ENSMUSG00000018654.17	Ikzf1	180.07	1.75945	6.65e-20	2.14e-17
ENSMUSG00000024565.8	Sall3	86.3938	1.75639	1.15e-05	0.000268577
ENSMUSG00000041420.18	Meis3	76.026	1.75449	1.26e-10	8.76e-09
ENSMUSG00000041797.7	Abca9	256.133	1.74986	9.48e-09	4.51e-07
ENSMUSG00000038352.15	Arl5c	74.8023	1.7441	7.09e-10	4.26e-08
ENSMUSG00000049625.5	Tifab	148	1.73862	7.67e-11	5.59e-09
ENSMUSG00000087107.7	NA	93.8745	1.73527	2.91e-08	1.23e-06
ENSMUSG00000036353.13	P2ry12	96.8676	1.72689	1.01e-14	1.48e-12
ENSMUSG00000024451.8	Arap3	113.269	1.72609	8.98e-12	7.8e-10
ENSMUSG00000049037.8	Clec4a1	161.148	1.72169	5.18e-16	9.04e-14
ENSMUSG00000078920.2	Ifi47	132.47	1.71973	4.94e-12	4.68e-10
ENSMUSG00000045545.8	Krt14	61.2794	1.7192	1.45e-05	0.000329803
ENSMUSG00000030117.5	Gdf3	97.5665	1.71914	1.8e-11	1.49e-09
ENSMUSG00000046207.14	Pik3r6	58.4997	1.71667	6.42e-09	3.17e-07
ENSMUSG00000073680.2	Tmem88b	105.005	1.71661	5.88e-07	1.88e-05
ENSMUSG00000021322.7	Aoah	260.326	1.71147	8.65e-13	9.09e-11
ENSMUSG00000061601.15	Pclo	302.661	1.7094	7.94e-07	2.48e-05
ENSMUSG00000029322.12	Plac8	71.3814	1.70705	1.28e-06	3.83e-05
ENSMUSG00000062960.10	Kdr	65.9631	1.70477	NA	NA
ENSMUSG00000008496.18	Pou2f2	150.868	1.70219	2.14e-17	4.96e-15
ENSMUSG00000005803.14	Sqrdl	80.4521	1.70062	2.65e-09	1.41e-07
ENSMUSG00000056673.14	Kdm5d	429.343	1.68719	1.56e-09	8.6e-08
ENSMUSG00000026482.13	Rgl1	159.568	1.68673	1.77e-13	2.1e-11
ENSMUSG00000051579.10	Tceal8	88.7802	1.68378	2.68e-06	7.36e-05
ENSMUSG00000024677.13	Ms4a6b	186.424	1.68198	9.19e-18	2.21e-15
ENSMUSG00000025888.5	Casp1	90.0608	1.68036	5.8e-08	2.33e-06
ENSMUSG00000075010.4	NA	80.5388	1.67348	1.32e-08	6.05e-07
ENSMUSG00000047414.6	Flrt2	85.4019	1.67247	1.58e-05	0.000354485
ENSMUSG00000048163.13	Selplg	205.063	1.67135	1.85e-10	1.24e-08
ENSMUSG00000053469.13	Tg	227.536	1.67023	4.17e-09	2.14e-07
ENSMUSG00000068457.14	Uty	368.651	1.66955	6.13e-12	5.61e-10
ENSMUSG00000042190.12	Cmklr1	212.532	1.66742	5.32e-13	5.75e-11
ENSMUSG00000026417.13	Pigr	1077.01	1.66691	9.7e-16	1.59e-13
ENSMUSG00000028128.13	F3	240.359	1.66561	9.17e-26	5.45e-23
ENSMUSG00000040950.13	Mgl2	94.7569	1.66529	9.35e-11	6.66e-09
ENSMUSG00000022876.17	Samsn1	74.2883	1.66453	2.61e-06	7.19e-05
ENSMUSG00000002602.16	Axl	957.399	1.66383	4.8e-24	2.34e-21
ENSMUSG00000025190.13	Got1	199.55	1.65916	1.87e-09	1.02e-07
ENSMUSG00000027544.16	Nfatc2	104.729	1.65572	2.2e-09	1.18e-07
ENSMUSG00000054675.5	Tmem119	177.341	1.65094	1.21e-12	1.25e-10
ENSMUSG00000026399.12	Cd55	622.757	1.64862	1.24e-09	7e-08
ENSMUSG00000049988.3	Lrrc25	144.619	1.64833	1.23e-10	8.64e-09
ENSMUSG00000027848.12	Olfml3	258.09	1.64408	4.61e-19	1.33e-16
ENSMUSG00000028262.13	Clca3a2	69.0784	1.63918	1.83e-06	5.18e-05
ENSMUSG00000006611.14	Hfe	135.376	1.63544	6.73e-14	8.59e-12
ENSMUSG00000035711.4	Dok3	152.269	1.63478	8.29e-11	5.98e-09
ENSMUSG00000046410.9	Kcnk6	91.8754	1.63232	1.18e-09	6.72e-08
ENSMUSG00000024521.7	Pmaip1	100.077	1.63122	8.08e-07	2.51e-05
ENSMUSG00000034205.16	Loxl2	83.5499	1.62719	5.57e-10	3.42e-08
ENSMUSG00000034641.2	Cd300ld	89.959	1.62351	5.92e-08	2.37e-06
ENSMUSG00000052821.3	Cysltr1	106.573	1.62305	9.1e-12	7.87e-10
ENSMUSG00000021539.8	Lect2	224.041	1.62188	5.83e-06	0.000146927
ENSMUSG00000053063.11	Clec12a	248.025	1.6197	4.56e-11	3.47e-09
ENSMUSG00000083307.1	NA	165.472	1.61917	2.03e-07	7.19e-06
ENSMUSG00000020120.15	Plek	668.855	1.61777	1.82e-12	1.83e-10
ENSMUSG00000039115.13	Itga9	168.981	1.6146	1.38e-13	1.7e-11
ENSMUSG00000036362.2	P2ry13	68.0452	1.61433	1.32e-08	6.05e-07
ENSMUSG00000071715.11	Ncf4	139.445	1.61063	4.67e-07	1.53e-05
ENSMUSG00000030047.14	Arhgap25	125.923	1.6106	4.79e-10	2.96e-08
ENSMUSG00000037649.9	H2-DMa	200.392	1.60816	7.7e-15	1.14e-12
ENSMUSG00000020926.16	Adam11	300.316	1.60742	1.1e-17	2.61e-15
ENSMUSG00000049130.5	C5ar1	254.508	1.60552	2.43e-09	1.3e-07
ENSMUSG00000021319.6	Sfrp4	86.3237	1.60522	3.44e-05	0.000687622
ENSMUSG00000031133.12	Arhgef6	161.94	1.60077	7.69e-12	6.81e-10
ENSMUSG00000040253.15	Gbp7	97.0357	1.59924	2.85e-07	9.73e-06
ENSMUSG00000022372.14	Sla	184.022	1.59872	7.43e-11	5.44e-09
ENSMUSG00000030671.8	Pde3b	103.402	1.59844	7.09e-12	6.46e-10
ENSMUSG00000022602.14	Arc	212.539	1.59685	1.96e-08	8.7e-07
ENSMUSG00000035697.14	Hmha1	428.433	1.59457	2.36e-15	3.68e-13
ENSMUSG00000038811.13	Gngt2	56.7603	1.59427	1.47e-06	4.31e-05
ENSMUSG00000030263.13	Lrmp	95.4041	1.5929	6.57e-09	3.24e-07
ENSMUSG00000051212.7	Gpr183	58.1133	1.59243	3.68e-07	1.23e-05
ENSMUSG00000052336.6	Cx3cr1	918.481	1.59101	1.13e-31	1.19e-28
ENSMUSG00000026480.12	Ncf2	137.125	1.58975	2.68e-11	2.13e-09
ENSMUSG00000030830.18	Itgal	149.467	1.58757	1.71e-09	9.32e-08
ENSMUSG00000062078.14	Qk	398.74	1.58683	6.2e-13	6.63e-11
ENSMUSG00000039126.9	Prune2	213.834	1.58666	7.82e-11	5.66e-09
ENSMUSG00000027199.14	Gatm	374.274	1.58587	2.52e-11	2.02e-09
ENSMUSG00000056529.7	Ptafr	223.881	1.58459	3.2e-09	1.68e-07
ENSMUSG00000018927.3	Ccl6	522.566	1.58423	2.36e-12	2.33e-10
ENSMUSG00000046688.14	Tifa	292.06	1.58368	6.62e-22	2.47e-19
ENSMUSG00000026786.14	Apbb1ip	159.243	1.58221	1.26e-08	5.8e-07
ENSMUSG00000024300.16	Myo1f	372.655	1.58114	1.4e-14	1.97e-12
ENSMUSG00000036469.16	March1	125.208	1.58026	1.76e-15	2.82e-13
ENSMUSG00000029122.11	Evc	58.9396	1.58019	5.7e-05	0.00107232
ENSMUSG00000003283.13	Hck	211.708	1.57824	7.38e-12	6.6e-10
ENSMUSG00000026288.14	Inpp5d	559.166	1.57803	6.06e-26	3.72e-23
ENSMUSG00000019122.8	Ccl9	474.497	1.57803	1.16e-12	1.21e-10
ENSMUSG00000034855.13	Cxcl10	101.384	1.5756	6.43e-08	2.56e-06
ENSMUSG00000108084.1	NA	81.9349	1.57177	1.8e-05	0.000395354
ENSMUSG00000039997.16	Ifi203	143.794	1.56828	5.25e-08	2.12e-06
ENSMUSG00000090272.7	Mndal	100.098	1.56211	4.76e-09	2.42e-07
ENSMUSG00000070873.5	Lilra5	89.2781	1.56011	8.41e-11	6.04e-09
ENSMUSG00000022102.13	Dok2	136.477	1.55874	1.37e-11	1.15e-09
ENSMUSG00000018819.10	Lsp1	328.731	1.55812	1.73e-11	1.44e-09
ENSMUSG00000040829.14	Zmynd15	416.164	1.55804	1.59e-11	1.32e-09
ENSMUSG00000009292.17	Trpm2	127.958	1.55564	1.47e-13	1.78e-11
ENSMUSG00000015852.13	Fcrls	771.074	1.55521	1.53e-34	2.09e-31
ENSMUSG00000031389.17	Arhgap4	136.72	1.55493	2.67e-13	3.08e-11
ENSMUSG00000029231.15	Pdgfra	122.056	1.55072	4.92e-06	0.000126581
ENSMUSG00000044827.10	Tlr1	97.0052	1.54855	8e-10	4.78e-08
ENSMUSG00000031502.9	Col4a1	1101.8	1.54464	4.97e-07	1.61e-05
ENSMUSG00000053687.14	Dpep2	118.413	1.54372	2.44e-07	8.52e-06
ENSMUSG00000068699.12	Flnc	54.7418	1.54365	1.6e-05	0.00035701
ENSMUSG00000033220.6	Rac2	231.896	1.54291	5.14e-09	2.59e-07
ENSMUSG00000035373.2	Ccl7	227.81	1.53669	1.81e-07	6.46e-06
ENSMUSG00000026826.13	Nr4a2	961.77	1.53149	1.14e-08	5.35e-07
ENSMUSG00000052142.15	Rasal3	94.4001	1.52975	9.76e-07	2.97e-05
ENSMUSG00000041912.12	Tdrkh	67.557	1.5284	NA	NA
ENSMUSG00000026814.16	Eng	71.1732	1.52694	4.16e-09	2.14e-07
ENSMUSG00000029771.12	Irf5	284.422	1.52602	4.09e-11	3.16e-09
ENSMUSG00000024965.8	Fermt3	342.106	1.52323	5.64e-12	5.24e-10
ENSMUSG00000021876.14	Rnase4	396.739	1.52044	9.08e-15	1.34e-12
ENSMUSG00000028965.13	Tnfrsf9	76.17	1.51977	3.88e-05	0.000762592
ENSMUSG00000004730.14	Adgre1	909.241	1.51765	4.96e-31	4.97e-28
ENSMUSG00000049288.4	Lix1l	167.608	1.5139	9.44e-10	5.49e-08
ENSMUSG00000025804.4	Ccr1	222.752	1.51381	2.51e-07	8.74e-06
ENSMUSG00000028459.11	Cd72	235.745	1.51326	3.9e-16	7e-14
ENSMUSG00000040528.15	Milr1	64.8516	1.51281	3.74e-07	1.24e-05
ENSMUSG00000048779.4	P2ry6	218.43	1.51094	5.03e-09	2.54e-07
ENSMUSG00000030148.15	Clec4a2	102.639	1.5108	3.43e-06	9.21e-05
ENSMUSG00000025915.14	Sgk3	98.6623	1.51022	1.49e-06	4.36e-05
ENSMUSG00000042804.13	Gpr153	247.237	1.50944	1.45e-09	8.08e-08
ENSMUSG00000026928.14	Card9	101.737	1.508	3.16e-11	2.47e-09
ENSMUSG00000055632.17	Hmcn2	52.8031	1.50768	4.16e-05	0.000809019
ENSMUSG00000043300.2	B3galnt1	52.8211	1.50698	2.98e-07	1.01e-05
ENSMUSG00000037405.7	Icam1	412.054	1.50595	3.55e-09	1.85e-07
ENSMUSG00000003484.4	Cyp4f18	111.673	1.5059	4.33e-08	1.79e-06
ENSMUSG00000082433.2	NA	80.3154	1.50448	2.26e-10	1.49e-08
ENSMUSG00000078771.10	Evi2a	151.414	1.50418	6.13e-11	4.54e-09
ENSMUSG00000000982.5	Ccl3	291.202	1.50159	1.56e-09	8.58e-08
ENSMUSG00000020589.16	Fam49a	60.2123	1.49873	1.57e-06	4.57e-05
ENSMUSG00000024066.8	Xdh	402.343	1.49785	1.23e-08	5.69e-07
ENSMUSG00000022667.17	Cd200r1	53.7324	1.49715	1.32e-06	3.92e-05
ENSMUSG00000001348.14	Acp5	258.337	1.49599	3.19e-09	1.68e-07
ENSMUSG00000026271.15	Gpr35	98.8696	1.4938	9.6e-07	2.95e-05
ENSMUSG00000015950.13	Ncf1	332.884	1.4926	3.6e-09	1.86e-07
ENSMUSG00000079293.11	Clec7a	441.842	1.49028	2.83e-10	1.82e-08
ENSMUSG00000073490.10	AI607873	305.998	1.49015	1.65e-08	7.44e-07
ENSMUSG00000032690.16	Oas2	182.383	1.49002	1.53e-07	5.55e-06
ENSMUSG00000019997.11	Ctgf	668.018	1.48862	7.38e-27	5.02e-24
ENSMUSG00000030124.2	Lag3	119.948	1.48654	1.78e-06	5.07e-05
ENSMUSG00000026548.4	Slamf9	155.794	1.4847	6.11e-13	6.57e-11
ENSMUSG00000024397.14	Aif1	174.752	1.48323	2.01e-09	1.08e-07
ENSMUSG00000028864.7	Hgf	108.733	1.4825	3.96e-05	0.000777519
ENSMUSG00000039899.5	Fgl2	234.693	1.47956	2.52e-08	1.08e-06
ENSMUSG00000031264.13	Btk	95.3921	1.47798	5.09e-05	0.000969573
ENSMUSG00000043004.13	Gng2	131.377	1.47777	7.26e-09	3.54e-07
ENSMUSG00000030214.6	Plbd1	246.506	1.4768	1.95e-08	8.69e-07
ENSMUSG00000052160.6	Pld4	603.565	1.47565	1.22e-23	5.68e-21
ENSMUSG00000031438.11	Rnf128	209.193	1.47295	2.82e-05	0.000580329
ENSMUSG00000045322.10	Tlr9	70.8795	1.47103	1.86e-05	0.000406603
ENSMUSG00000058624.12	Gda	342.396	1.46945	2.95e-07	1.01e-05
ENSMUSG00000073489.5	Ifi204	172.691	1.46754	3.5e-07	1.17e-05
ENSMUSG00000031750.15	Il34	110.166	1.46565	8.04e-07	2.51e-05
ENSMUSG00000040552.8	C3ar1	544.403	1.46558	3.76e-12	3.61e-10
ENSMUSG00000079017.3	Ifi27l2a	125.347	1.46468	3.37e-07	1.13e-05
ENSMUSG00000079227.9	Ccr5	382.734	1.46428	5.02e-12	4.73e-10
ENSMUSG00000031608.13	Galnt7	94.1723	1.46292	1.68e-06	4.84e-05
ENSMUSG00000023349.14	Clec4n	238.627	1.46263	4.68e-11	3.55e-09
ENSMUSG00000021423.5	Ly86	291.742	1.45835	1.67e-13	2e-11
ENSMUSG00000026398.14	Nr5a2	254.679	1.45813	3.79e-13	4.21e-11
ENSMUSG00000038271.17	Iffo1	73.6116	1.4576	7.41e-09	3.61e-07
ENSMUSG00000028859.14	Csf3r	146.437	1.4565	1.17e-07	4.36e-06
ENSMUSG00000060703.12	Cd302	102.852	1.45549	1.53e-07	5.57e-06
ENSMUSG00000034947.13	Tmem106a	280.168	1.45421	2.27e-11	1.83e-09
ENSMUSG00000024238.13	Zeb1	128.411	1.45153	9.68e-07	2.96e-05
ENSMUSG00000023046.6	Igfbp6	134.167	1.4462	0.000337446	0.00490224
ENSMUSG00000004609.11	Cd33	316.274	1.44249	7.7e-11	5.59e-09
ENSMUSG00000055541.17	Lair1	284.799	1.44216	6.09e-15	9.19e-13
ENSMUSG00000004952.13	Rasa4	222.341	1.44072	2.49e-08	1.08e-06
ENSMUSG00000098112.7	Bin2	126.359	1.44058	9.62e-09	4.57e-07
ENSMUSG00000039109.15	F13a1	820.917	1.43929	2.86e-14	3.81e-12
ENSMUSG00000043008.8	Klhl6	111.003	1.43822	6.98e-09	3.41e-07
ENSMUSG00000052776.10	Oas1a	59.7465	1.43773	6.49e-06	0.000160833
ENSMUSG00000020143.15	Dock2	353.091	1.43577	1.43e-06	4.22e-05
ENSMUSG00000069049.11	Eif2s3y	582.64	1.42936	1.2e-08	5.61e-07
ENSMUSG00000047250.13	Ptgs1	948.156	1.4291	9.99e-22	3.59e-19
ENSMUSG00000009185.2	Ccl8	210.089	1.42727	4.51e-10	2.8e-08
ENSMUSG00000041828.15	Abca8a	62.9075	1.42288	0.0005501	0.0073725
ENSMUSG00000030745.9	Il21r	156.311	1.42156	3.15e-07	1.07e-05
ENSMUSG00000069792.5	Wfdc17	141.877	1.4211	3.79e-07	1.26e-05
ENSMUSG00000006445.3	Epha2	659.641	1.42084	3.66e-12	3.54e-10
ENSMUSG00000015947.10	Fcgr1	276.632	1.41583	1.46e-10	1e-08
ENSMUSG00000021944.15	Gata4	122.837	1.41527	NA	NA
ENSMUSG00000031596.15	Slc7a2	238.825	1.41333	8.35e-10	4.95e-08
ENSMUSG00000046245.13	Pilra	117.461	1.41321	2.17e-07	7.62e-06
ENSMUSG00000026712.3	Mrc1	1076.53	1.41205	6.8e-13	7.23e-11
ENSMUSG00000031165.6	Was	108.002	1.41188	1.62e-07	5.85e-06
ENSMUSG00000031662.7	Snx20	64.9894	1.40629	3.01e-05	0.000614018
ENSMUSG00000002699.12	Lcp2	193.651	1.40604	6.06e-11	4.51e-09
ENSMUSG00000035158.15	Mitf	95.4745	1.40522	9.15e-08	3.54e-06
ENSMUSG00000069743.4	Zfp820	97.1435	1.40497	1.71e-07	6.12e-06
ENSMUSG00000049281.15	Scn3b	1653.72	1.40364	9.25e-09	4.43e-07
ENSMUSG00000024737.2	Slc15a3	292.456	1.39939	1.58e-07	5.71e-06
ENSMUSG00000036334.12	Igsf10	69.7402	1.39714	0.000593633	0.00786729
ENSMUSG00000027009.18	Itga4	168.296	1.39676	1.76e-06	5.02e-05
ENSMUSG00000056145.5	NA	92.1391	1.39517	5.81e-07	1.86e-05
ENSMUSG00000023992.14	Trem2	342.739	1.39442	2.19e-11	1.77e-09
ENSMUSG00000074622.4	Mafb	615.226	1.39244	5.84e-10	3.56e-08
ENSMUSG00000038623.9	Tm6sf1	126.922	1.38955	2.23e-08	9.75e-07
ENSMUSG00000039239.14	Tgfb2	466.908	1.38729	6.12e-23	2.53e-20
ENSMUSG00000024164.15	C3	1267.9	1.38621	9.15e-06	0.000220325
ENSMUSG00000025665.16	Rps6ka6	75.4095	1.38609	0.000348334	0.00503735
ENSMUSG00000035385.5	Ccl2	323.559	1.38209	1.19e-09	6.76e-08
ENSMUSG00000029223.12	Uchl1	364.572	1.38199	1.76e-12	1.78e-10
ENSMUSG00000030844.11	Rgs10	170.37	1.38165	4.83e-10	2.97e-08
ENSMUSG00000021806.3	Nid2	53.5411	1.38157	1.05e-05	0.000248126
ENSMUSG00000051457.7	Spn	63.8964	1.38065	2.07e-05	0.00044428
ENSMUSG00000027173.7	Depdc7	106.694	1.3804	2.82e-06	7.7e-05
ENSMUSG00000032420.7	Nt5e	86.8669	1.37887	6.76e-07	2.13e-05
ENSMUSG00000049871.13	Nlrc3	197.909	1.37865	3.26e-06	8.77e-05
ENSMUSG00000070469.11	Adamtsl3	244.054	1.37612	1.34e-07	4.94e-06
ENSMUSG00000020865.16	Abcc3	247.748	1.3756	2.89e-07	9.84e-06
ENSMUSG00000022265.6	Ank	108.258	1.37468	7.89e-09	3.83e-07
ENSMUSG00000044017.16	Adgrd1	118.81	1.37367	2.93e-05	0.00060038
ENSMUSG00000032724.5	Abtb2	320.228	1.37341	2.15e-07	7.57e-06
ENSMUSG00000034957.10	Cebpa	542.3	1.37267	3.24e-10	2.05e-08
ENSMUSG00000028995.14	Fam126a	71.5012	1.37114	6.19e-06	0.000154921
ENSMUSG00000022831.14	Hcls1	339.755	1.36983	1.17e-09	6.66e-08
ENSMUSG00000024672.11	Ms4a7	415.735	1.36841	1.41e-16	2.88e-14
ENSMUSG00000040181.14	Fmo1	71.6004	1.36642	6.88e-05	0.00126824
ENSMUSG00000006014.16	Prg4	51.8769	1.36627	1.32e-05	0.000303586
ENSMUSG00000029915.14	Clec5a	130.102	1.36444	3.57e-06	9.48e-05
ENSMUSG00000082305.4	NA	111.901	1.36148	3.18e-07	1.08e-05
ENSMUSG00000044811.13	Cd300c2	143.738	1.36011	6.91e-08	2.73e-06
ENSMUSG00000071203.6	Naip5	74.0131	1.35968	6.14e-07	1.95e-05
ENSMUSG00000055805.14	Fmnl1	291.713	1.35951	5.56e-07	1.79e-05
ENSMUSG00000032020.15	Ubash3b	81.2583	1.35801	4.55e-07	1.49e-05
ENSMUSG00000029070.9	Mxra8	71.219	1.35758	4.68e-05	0.000902543
ENSMUSG00000020437.12	Myo1g	198.132	1.35696	1.56e-06	4.56e-05
ENSMUSG00000026177.11	Slc11a1	332.418	1.35499	3.5e-08	1.47e-06
ENSMUSG00000017765.16	Slc12a4	84.1857	1.3536	4.41e-08	1.81e-06
ENSMUSG00000027750.16	Postn	288.367	1.35295	3.32e-05	0.000668078
ENSMUSG00000056413.16	Adap1	94.749	1.34861	3.84e-06	0.000101205
ENSMUSG00000043157.7	Arl11	71.2038	1.34805	5.57e-06	0.000141631
ENSMUSG00000048865.16	Arhgap30	341.154	1.34187	2.35e-15	3.68e-13
ENSMUSG00000030560.16	Ctsc	1256.13	1.33776	2.19e-12	2.19e-10
ENSMUSG00000026872.16	Zeb2	530.454	1.33645	2.55e-07	8.85e-06
ENSMUSG00000031563.7	Wwc2	181.555	1.33615	9.18e-05	0.00163317
ENSMUSG00000052384.13	Nrros	390.069	1.33566	1.58e-14	2.18e-12
ENSMUSG00000098557.1	Kctd12	549.798	1.33508	1.42e-10	9.74e-09
ENSMUSG00000021384.14	Susd3	63.484	1.33383	1.27e-06	3.81e-05
ENSMUSG00000039936.18	Pik3cd	289.471	1.33304	1.43e-07	5.21e-06
ENSMUSG00000044162.11	Tnip3	68.4157	1.33216	0.000245538	0.00376234
ENSMUSG00000058427.10	Cxcl2	560.326	1.33174	2.43e-10	1.59e-08
ENSMUSG00000072620.3	Slfn2	228.957	1.33105	2.42e-05	0.000507139
ENSMUSG00000040522.5	Tlr8	103.461	1.33093	3.7e-05	0.000733888
ENSMUSG00000015340.10	Cybb	1001.83	1.32897	4.65e-10	2.88e-08
ENSMUSG00000030786.18	Itgam	294.885	1.32864	1.43e-07	5.21e-06
ENSMUSG00000051439.6	Cd14	739.037	1.3285	1.34e-09	7.56e-08
ENSMUSG00000038037.4	Socs1	144.678	1.32659	4.16e-05	0.000809179
ENSMUSG00000022894.5	Adamts5	122.66	1.32473	0.000252533	0.00384784
ENSMUSG00000039519.6	Cyp7b1	139.285	1.32224	5.24e-05	0.000996591
ENSMUSG00000044345.9	Marveld1	79.4923	1.32138	5.9e-05	0.00110455
ENSMUSG00000028480.14	Glipr2	91.8081	1.32073	9.08e-09	4.35e-07
ENSMUSG00000028634.16	Hivep3	109.184	1.32053	9.25e-05	0.00164062
ENSMUSG00000015568.15	Lpl	700.367	1.31709	4.21e-12	4.02e-10
ENSMUSG00000047810.8	Ccdc88b	707.229	1.31608	2.17e-22	8.58e-20
ENSMUSG00000070390.12	Nlrp1b	70.9428	1.31414	2.99e-06	8.07e-05
ENSMUSG00000026395.16	Ptprc	815.193	1.31401	5.46e-21	1.92e-18
ENSMUSG00000059498.13	Fcgr3	380.043	1.31384	1.02e-09	5.92e-08
ENSMUSG00000031101.6	Sash3	94.5048	1.31269	1.36e-06	4.05e-05
ENSMUSG00000032452.12	Clstn2	73.3747	1.31157	0.000626665	0.00824193
ENSMUSG00000006651.7	Aplp1	94.0731	1.31074	3.59e-06	9.52e-05
ENSMUSG00000018920.11	Cxcl16	567.786	1.30924	5.88e-14	7.61e-12
ENSMUSG00000032322.14	Pstpip1	119.547	1.30628	3.13e-06	8.43e-05
ENSMUSG00000031444.16	F10	71.5953	1.30321	0.000397291	0.00564242
ENSMUSG00000043263.13	Pyhin1	76.2173	1.29952	4.81e-05	0.000925444
ENSMUSG00000097097.1	NA	104.698	1.29394	1.96e-05	0.000423412
ENSMUSG00000026458.13	Ppfia4	118.821	1.29106	1.21e-08	5.63e-07
ENSMUSG00000044708.5	Kcnj10	58.2094	1.29005	8.99e-05	0.00160424
ENSMUSG00000054404.12	Slfn5	185.464	1.28949	0.000114524	0.00198137
ENSMUSG00000026811.18	St6galnac6	126.442	1.28847	6.3e-09	3.12e-07
ENSMUSG00000037661.14	Gpr160	59.9313	1.28645	4.15e-06	0.000108835
ENSMUSG00000036553.16	Sh3tc1	86.2809	1.28644	1.57e-05	0.000352131
ENSMUSG00000030220.13	Arhgdib	193.641	1.28612	2.14e-06	5.97e-05
ENSMUSG00000038147.13	Cd84	327.144	1.28525	1.63e-06	4.72e-05
ENSMUSG00000023913.17	Pla2g7	370.767	1.285	1.17e-07	4.37e-06
ENSMUSG00000049103.13	Ccr2	306.653	1.28398	1.23e-07	4.58e-06
ENSMUSG00000044583.13	Tlr7	171.983	1.28182	2.66e-06	7.3e-05
ENSMUSG00000039316.14	Rftn1	273.546	1.2805	7.67e-06	0.000187881
ENSMUSG00000024679.10	Ms4a6d	217.189	1.2781	2.1e-05	0.000450783
ENSMUSG00000020399.14	Havcr2	72.6445	1.27804	1.03e-07	3.89e-06
ENSMUSG00000030577.13	Cd22	107.362	1.27371	3.59e-09	1.86e-07
ENSMUSG00000034459.8	Ifit1	62.3853	1.27284	0.000477978	0.00656306
ENSMUSG00000048001.7	Hes5	54.6807	1.27245	1.93e-05	0.000418309
ENSMUSG00000079419.4	Ms4a6c	109.013	1.27209	3.77e-05	0.000744343
ENSMUSG00000020077.14	Srgn	406.412	1.26819	3.45e-07	1.16e-05
ENSMUSG00000000290.13	Itgb2	694.918	1.26564	2.57e-07	8.9e-06
ENSMUSG00000002944.15	Cd36	176.033	1.26427	4.99e-05	0.000953951
ENSMUSG00000047592.17	Nxpe5	52.6901	1.26362	2.65e-05	0.000547301
ENSMUSG00000027322.11	Siglec1	545.229	1.26265	9.6e-06	0.000229813
ENSMUSG00000039910.9	Cited2	191.853	1.26261	1.7e-05	0.000375392
ENSMUSG00000057596.13	Trim30d	75.7828	1.26255	1.46e-05	0.000331475
ENSMUSG00000063193.8	Cd300lb	76.4573	1.25789	3.36e-05	0.000675394
ENSMUSG00000000682.7	Cd52	184.58	1.25678	5.06e-06	0.000129508
ENSMUSG00000042254.14	Cilp	311.507	1.25524	0.000253127	0.00385073
ENSMUSG00000026600.12	Soat1	491.797	1.25384	1.86e-10	1.24e-08
ENSMUSG00000031304.18	Il2rg	92.7268	1.25325	1.96e-06	5.54e-05
ENSMUSG00000091055.2	Siglec15	169.46	1.25206	NA	NA
ENSMUSG00000001123.15	Lgals9	249.382	1.25131	7.04e-06	0.000173363
ENSMUSG00000026692.12	Fmo4	155.028	1.24624	0.000563143	0.00751555
ENSMUSG00000003948.16	Mmd	61.7417	1.24599	0.000419017	0.00588944
ENSMUSG00000031897.8	Psmb10	188.927	1.24482	6.67e-08	2.65e-06
ENSMUSG00000049036.7	Tmem121	69.2194	1.24213	1.55e-05	0.000348912
ENSMUSG00000040061.17	Plcb2	90.9194	1.23756	1.84e-05	0.000402002
ENSMUSG00000025877.14	Hk3	166.952	1.23738	8.53e-05	0.00153084
ENSMUSG00000071714.5	Csf2rb2	200.429	1.23683	1.12e-05	0.000261001
ENSMUSG00000038521.17	C1s1	126.59	1.23351	0.000953036	0.0116864
ENSMUSG00000027435.8	Cd93	325.819	1.23344	8.51e-06	0.000205944
ENSMUSG00000030707.15	Coro1a	403.317	1.23337	1.19e-05	0.000277036
ENSMUSG00000030789.9	Itgax	247.385	1.23285	8.58e-05	0.00153799
ENSMUSG00000000530.16	Acvrl1	119.826	1.22996	5.01e-06	0.000128654
ENSMUSG00000041734.15	Kirrel	60.8263	1.2295	3.97e-05	0.000778113
ENSMUSG00000063286.6	NA	252.585	1.22735	3.6e-05	0.000716949
ENSMUSG00000002111.8	Spi1	305.358	1.22503	3.69e-10	2.33e-08
ENSMUSG00000031506.11	Ptpn7	109.987	1.22221	6.01e-06	0.000150781
ENSMUSG00000004415.15	Col26a1	1212.67	1.22219	3.17e-16	5.86e-14
ENSMUSG00000025185.14	Loxl4	56.1409	1.22215	7.78e-05	0.00141311
ENSMUSG00000019194.14	Scn1b	62.1935	1.22186	0.000692234	0.00896184
ENSMUSG00000022912.8	Pros1	168.59	1.22108	0.000146428	0.00242741
ENSMUSG00000056220.14	Pla2g4a	56.0518	1.21587	9.55e-05	0.00168804
ENSMUSG00000022488.8	Nckap1l	740.889	1.21586	1.35e-07	4.96e-06
ENSMUSG00000024803.8	Ankrd1	69.5365	1.21449	0.00231187	0.0243488
ENSMUSG00000031520.5	Vegfc	348.537	1.21086	9.47e-05	0.00167556
ENSMUSG00000021822.2	Plau	386.091	1.21066	3.52e-06	9.39e-05
ENSMUSG00000039004.5	Bmp6	178.019	1.20859	5.79e-06	0.000146833
ENSMUSG00000024621.15	Csf1r	1841.86	1.20585	1.15e-15	1.86e-13
ENSMUSG00000023274.14	Cd4	64.1832	1.20522	3.45e-06	9.24e-05
ENSMUSG00000043740.14	B430306N03Rik	68.3081	1.20146	1.46e-05	0.000331089
ENSMUSG00000018507.16	Trpv2	84.183	1.20128	0.000217603	0.00339041
ENSMUSG00000024663.17	Rab3il1	335.28	1.19954	1.38e-14	1.96e-12
ENSMUSG00000031788.13	Kifc3	595.616	1.19833	5.15e-08	2.09e-06
ENSMUSG00000015355.13	Cd48	148.509	1.19808	6.93e-07	2.18e-05
ENSMUSG00000033777.3	Tlr13	214.688	1.19711	1.58e-05	0.000354127
ENSMUSG00000020674.16	Pxdn	1108.02	1.19487	1.02e-05	0.000241761
ENSMUSG00000044456.16	Rin3	120.11	1.19134	5.75e-06	0.000145921
ENSMUSG00000099398.1	Ms4a14	156.216	1.18988	1.39e-05	0.000317429
ENSMUSG00000026358.13	Rgs1	656.82	1.18791	2.94e-05	0.000603091
ENSMUSG00000099032.2	Tcf24	184.823	1.18765	5.48e-05	0.00103914
ENSMUSG00000024529.13	Lox	106.408	1.18671	0.000415079	0.00585138
ENSMUSG00000021367.7	Edn1	116.332	1.18403	0.000123347	0.00210244
ENSMUSG00000031503.13	Col4a2	740.656	1.18403	1.49e-05	0.000336557
ENSMUSG00000098207.1	Arl14	178.31	1.18359	7.58e-05	0.00138199
ENSMUSG00000074896.3	Ifit3	63.9914	1.18093	0.000440774	0.00612737
ENSMUSG00000028581.17	Laptm5	961.552	1.1762	5.86e-12	5.41e-10
ENSMUSG00000047496.6	Rnf152	496.371	1.17518	1.43e-05	0.000327031
ENSMUSG00000042228.14	Lyn	427.39	1.16878	8.89e-12	7.76e-10
ENSMUSG00000038663.7	Fsd2	59.6421	1.16578	0.000362546	0.00521119
ENSMUSG00000022330.4	Osr2	456.008	1.16445	3.53e-10	2.23e-08
ENSMUSG00000045502.6	Hcar2	162.627	1.16216	0.00154258	0.0174743
ENSMUSG00000019775.17	Rgs17	497.414	1.16042	1.48e-05	0.00033413
ENSMUSG00000031283.15	Chrdl1	985.628	1.16015	1.72e-08	7.73e-07
ENSMUSG00000038843.17	Gcnt1	83.0182	1.15948	4.4e-05	0.000849507
ENSMUSG00000020272.8	Stk10	261.424	1.15936	5.45e-07	1.76e-05
ENSMUSG00000032122.14	Slc37a2	211.726	1.15858	4.47e-06	0.00011634
ENSMUSG00000035208.15	Slfn8	95.1886	1.15795	6.64e-05	0.00122937
ENSMUSG00000040613.14	Apobec1	430.22	1.1574	3.67e-11	2.85e-09
ENSMUSG00000061751.15	Kalrn	57.0802	1.15479	0.00376702	0.0361706
ENSMUSG00000101389.1	Ms4a4a	60.9755	1.15448	0.000532196	0.00717297
ENSMUSG00000032038.6	St3gal4	562.511	1.14954	2.02e-09	1.08e-07
ENSMUSG00000051455.13	Meioc	50.0582	1.14915	0.000591867	0.00784935
ENSMUSG00000073491.10	Pydc4	55.6869	1.14826	0.000669668	0.00870523
ENSMUSG00000026630.9	Batf3	54.2381	1.14611	2.96e-05	0.000605358
ENSMUSG00000025810.8	Nrp1	512.444	1.14475	2.69e-05	0.000555148
ENSMUSG00000020901.13	Pik3r5	246.758	1.1441	4.15e-05	0.000808018
ENSMUSG00000051735.6	Rinl	72.1727	1.144	6.89e-05	0.00126868
ENSMUSG00000030748.9	Il4ra	754.817	1.14386	5.92e-09	2.95e-07
ENSMUSG00000022150.16	Dab2	879.366	1.14379	3.36e-08	1.41e-06
ENSMUSG00000024696.8	Lpxn	123.807	1.14306	1.04e-05	0.000246292
ENSMUSG00000029561.17	Oasl2	247.98	1.1422	2.15e-05	0.000459495
ENSMUSG00000040747.9	Cd53	415.86	1.14192	1.1e-05	0.000257962
ENSMUSG00000045827.10	Serpinb9	88.7055	1.13915	9.76e-07	2.97e-05
ENSMUSG00000026737.12	Pip4k2a	254.872	1.13633	2.64e-10	1.72e-08
ENSMUSG00000079278.1	Tmem233	52.9248	1.13476	0.000938613	0.0115392
ENSMUSG00000042607.15	Asb4	1795.59	1.13378	3.42e-07	1.15e-05
ENSMUSG00000021959.15	Lats2	136.726	1.13373	0.000273753	0.00411353
ENSMUSG00000064043.13	NA	62.7675	1.13346	0.000263986	0.00399115
ENSMUSG00000045441.5	Gprin3	95.1293	1.13163	0.00140668	0.0162937
ENSMUSG00000034271.15	Jdp2	66.4549	1.13096	3.67e-05	0.000729543
ENSMUSG00000038180.11	Spag4	60.426	1.12975	9.19e-05	0.00163339
ENSMUSG00000042357.2	Gjb5	252.915	1.12947	0.000187188	0.0029936
ENSMUSG00000028195.4	Cyr61	1012.74	1.12651	3.44e-19	1.01e-16
ENSMUSG00000026981.15	Il1rn	440.337	1.12582	0.000536102	0.00722049
ENSMUSG00000006205.13	Htra1	219.717	1.12322	0.000105964	0.00185009
ENSMUSG00000027962.14	Vcam1	1131.47	1.12204	4.92e-13	5.35e-11
ENSMUSG00000028525.16	Pde4b	443.487	1.12092	0.000154389	0.00253728
ENSMUSG00000009687.14	Fxyd5	295.218	1.12088	2.43e-05	0.000508914
ENSMUSG00000029309.7	Sparcl1	73.8113	1.11797	1.8e-05	0.000395217
ENSMUSG00000030579.9	Tyrobp	312.653	1.11667	2.44e-08	1.05e-06
ENSMUSG00000024642.16	Tle4	158.431	1.1166	7.97e-06	0.000194194
ENSMUSG00000062210.13	Tnfaip8	318.98	1.1161	1.39e-09	7.77e-08
ENSMUSG00000015968.16	Cacna1d	90.9397	1.11513	0.000227249	0.00352468
ENSMUSG00000041347.5	Bdkrb1	199.761	1.11437	1.07e-09	6.16e-08
ENSMUSG00000070034.13	Sp110	56.2811	1.11425	0.000121511	0.00208144
ENSMUSG00000031367.15	Ap1s2	133.834	1.11265	2.2e-08	9.64e-07
ENSMUSG00000031375.17	Bgn	447.142	1.1125	2.12e-07	7.46e-06
ENSMUSG00000030142.10	Clec4e	249.852	1.11132	0.00106771	0.0129342
ENSMUSG00000056888.11	Glipr1	67.8083	1.11072	3.08e-05	0.000625305
ENSMUSG00000018008.7	Cyth4	627.915	1.11044	2.15e-16	4.14e-14
ENSMUSG00000022148.15	Fyb	310.211	1.10993	1.79e-06	5.09e-05
ENSMUSG00000037060.2	Prkcdbp	77.4127	1.10939	0.000189884	0.0030271
ENSMUSG00000025887.10	Casp12	280.492	1.10927	3.79e-09	1.96e-07
ENSMUSG00000071713.4	Csf2rb	281.547	1.10847	0.000229622	0.00355568
ENSMUSG00000036256.13	Igfbp7	86.8662	1.10763	2.82e-05	0.000580329
ENSMUSG00000038400.15	Pmepa1	908.904	1.10741	1.94e-11	1.59e-09
ENSMUSG00000027175.10	Tcp11l1	84.2977	1.10404	0.00160364	0.0180053
ENSMUSG00000041827.15	Oasl1	60.1232	1.10399	0.000937021	0.0115346
ENSMUSG00000021591.7	Glrx	103.888	1.10173	2.65e-06	7.29e-05
ENSMUSG00000017737.2	Mmp9	107.932	1.10173	0.00503926	0.0455376
ENSMUSG00000027508.15	Pag1	79.3849	1.10109	0.00024876	0.00379643
ENSMUSG00000020709.15	Adap2	118.458	1.10071	0.000512524	0.00698199
ENSMUSG00000062545.4	Tlr12	52.885	1.10062	0.000126196	0.00213668
ENSMUSG00000034394.14	Lif	309.14	1.10018	1.72e-06	4.93e-05
ENSMUSG00000038608.15	Dock10	248.76	1.09769	0.000103103	0.00180497
ENSMUSG00000031757.6	Mt4	197.638	1.0939	5.57e-05	0.00105454
ENSMUSG00000048988.8	Elfn1	556.848	1.09382	8.73e-08	3.4e-06
ENSMUSG00000078945.10	Naip2	117.559	1.08957	9.39e-05	0.00166307
ENSMUSG00000058818.13	Pirb	202.698	1.08951	7.72e-05	0.00140281
ENSMUSG00000037926.15	Ssh2	496.36	1.08835	6.22e-06	0.000155453
ENSMUSG00000037148.7	Arhgap10	57.32	1.08564	0.000490328	0.00671809
ENSMUSG00000024411.9	Aqp4	198.516	1.08512	0.00810908	0.0666626
ENSMUSG00000037944.8	Ccr7	666.427	1.08168	1.81e-05	0.000397277
ENSMUSG00000021054.5	Sgpp1	158.725	1.08037	0.0011656	0.0139248
ENSMUSG00000054072.11	Iigp1	127.469	1.07586	0.000227572	0.00352682
ENSMUSG00000001128.7	Cfp	534.855	1.07559	5.62e-07	1.8e-05
ENSMUSG00000039934.12	Gsap	135.166	1.07453	0.000106275	0.00185383
ENSMUSG00000056501.3	Cebpb	147.058	1.07333	8.63e-07	2.68e-05
ENSMUSG00000027947.11	Il6ra	217.537	1.07213	0.000762284	0.00967135
ENSMUSG00000061013.5	Mkx	57.7345	1.07194	0.000890937	0.0110675
ENSMUSG00000079330.8	Lemd1	276.813	1.07128	4.39e-07	1.44e-05
ENSMUSG00000044906.4	4930503L19Rik	103.113	1.07001	2.21e-05	0.000469089
ENSMUSG00000031838.7	Ifi30	409.942	1.06859	1.85e-07	6.59e-06
ENSMUSG00000047230.6	Cldn2	602.575	1.06855	0.000301136	0.00445293
ENSMUSG00000022512.2	Cldn1	220.524	1.06827	7.09e-05	0.00129929
ENSMUSG00000026107.11	Nabp1	407.909	1.06654	0.00016446	0.00268887
ENSMUSG00000078942.10	Naip6	63.5193	1.06116	0.00235235	0.0246111
ENSMUSG00000046152.16	Fut10	114.859	1.05626	0.000270213	0.00407135
ENSMUSG00000011256.16	Adam19	164.654	1.05586	1.38e-06	4.08e-05
ENSMUSG00000037126.15	Psd	338.922	1.05502	1.42e-09	7.9e-08
ENSMUSG00000039208.15	Metrnl	182.566	1.05477	0.000109703	0.00190488
ENSMUSG00000073421.5	H2-Ab1	746.349	1.05471	2.36e-09	1.26e-07
ENSMUSG00000033006.9	Sox10	76.2695	1.05401	0.0105354	0.0820709
ENSMUSG00000058715.11	Fcer1g	346.137	1.05347	3.84e-07	1.27e-05
ENSMUSG00000037921.14	Ddx60	84.4495	1.05276	5.36e-05	0.00101791
ENSMUSG00000019564.12	Arid3a	50.2033	1.05186	0.000737044	0.00942653
ENSMUSG00000060586.10	H2-Eb1	717.666	1.05017	1.37e-09	7.67e-08
ENSMUSG00000020122.16	Egfr	154.177	1.04931	0.00475645	0.0435821
ENSMUSG00000056313.5	1810011O10Rik	376.697	1.04864	1.46e-09	8.1e-08
ENSMUSG00000021728.7	Emb	98.9291	1.04674	0.0014716	0.0168239
ENSMUSG00000036067.12	Slc2a6	59.6527	1.0453	0.00200182	0.0216336
ENSMUSG00000015112.15	Slc25a13	316.658	1.0378	7.43e-12	6.61e-10
ENSMUSG00000029373.7	Pf4	194.867	1.03674	0.000155896	0.00255984
ENSMUSG00000029718.14	Pcolce	180.843	1.03512	6.88e-06	0.00016953
ENSMUSG00000016918.15	Sulf1	176.012	1.03182	5.8e-05	0.00108841
ENSMUSG00000046714.7	Foxc2	62.9516	1.02551	0.00662264	0.0569523
ENSMUSG00000024620.11	Pdgfrb	81.1254	1.02508	0.000444381	0.006173
ENSMUSG00000022132.15	Cldn10	517.286	1.02398	6.93e-08	2.73e-06
ENSMUSG00000014813.8	Stc1	322.267	1.02211	2.88e-06	7.82e-05
ENSMUSG00000003518.13	Dusp3	180.161	1.0216	2.19e-05	0.000465438
ENSMUSG00000046314.15	Stxbp6	688.759	1.0205	9.86e-08	3.75e-06
ENSMUSG00000067203.7	NA	147.306	1.02011	4.35e-05	0.000842248
ENSMUSG00000032839.13	Trpc1	86.7088	1.01887	0.00251467	0.0260232
ENSMUSG00000031877.8	Ces2g	71.3892	1.01803	0.0018593	0.0202892
ENSMUSG00000039313.14	AF529169	61.2172	1.01469	0.00162774	0.0182169
ENSMUSG00000008318.9	Relt	76.4939	1.01123	0.000121238	0.00207863
ENSMUSG00000032661.9	Oas3	67.1062	1.00671	0.00741225	0.0622793
ENSMUSG00000033467.12	Crlf2	262.722	1.00645	2.8e-05	0.000577249
ENSMUSG00000049571.16	Cfap46	129.074	1.00479	0.00273712	0.0277963
ENSMUSG00000025044.15	Msr1	377.327	1.0031	0.00060383	0.0079913
ENSMUSG00000027457.15	Snph	1242.32	1.00228	1.09e-07	4.11e-06
ENSMUSG00000027514.14	Zbp1	191.035	1.00209	9.9e-06	0.000235847
ENSMUSG00000035493.9	Tgfbi	922.059	0.99911	0.000258286	0.00391981
ENSMUSG00000052430.15	Bmpr1b	91.855	0.998013	0.00924367	0.0740389
ENSMUSG00000020638.7	Cmpk2	81.9568	0.997892	0.000620615	0.00817931
ENSMUSG00000035352.3	Ccl12	135.49	0.997446	2.59e-05	0.000536837
ENSMUSG00000032515.7	Csrnp1	933.072	0.99472	5.01e-05	0.000956275
ENSMUSG00000004105.8	Angptl2	587.67	0.993922	0.00122706	0.0145191
ENSMUSG00000033740.17	St18	132.372	0.993812	NA	NA
ENSMUSG00000052760.15	A630001G21Rik	57.6759	0.992764	0.000669435	0.00870523
ENSMUSG00000034765.6	Dusp5	469.595	0.989679	0.000237696	0.00365691
ENSMUSG00000035109.14	Shc4	239.089	0.989414	1.37e-05	0.000313024
ENSMUSG00000042500.11	Ago4	106.677	0.989007	0.00315071	0.0310518
ENSMUSG00000060063.9	Alox5ap	143.172	0.987566	0.000182284	0.00292746
ENSMUSG00000018217.12	Pmp22	270.249	0.987185	0.000167724	0.00273283
ENSMUSG00000000693.10	Loxl3	85.185	0.986224	0.000123875	0.00210648
ENSMUSG00000020573.16	Pik3cg	183.536	0.985475	1.41e-05	0.000322642
ENSMUSG00000028874.14	Fgr	190.105	0.985323	9.27e-06	0.000222658
ENSMUSG00000030144.4	Clec4d	156.341	0.983238	0.00162824	0.0182169
ENSMUSG00000051506.16	Wdfy4	204.878	0.980031	0.000955006	0.011703
ENSMUSG00000073002.9	Vamp5	109.394	0.978327	5.76e-05	0.00108301
ENSMUSG00000017607.9	Tns4	533.299	0.97819	0.000518673	0.00704558
ENSMUSG00000055538.7	Zcchc24	159.854	0.974981	5.65e-05	0.00106732
ENSMUSG00000030708.13	Dnajb13	70.7046	0.973735	0.000149543	0.00246765
ENSMUSG00000036594.14	H2-Aa	759.637	0.972988	7.97e-09	3.86e-07
ENSMUSG00000060519.11	Tor3a	260.937	0.970976	1.1e-05	0.000257557
ENSMUSG00000040212.11	Emp3	162.131	0.969438	0.000694184	0.00897487
ENSMUSG00000026817.14	Ak1	54.9837	0.967826	0.00365074	0.0353754
ENSMUSG00000038178.16	Slc43a2	636.131	0.966198	1.78e-07	6.38e-06
ENSMUSG00000029919.5	Hpgds	248.853	0.963906	0.000492067	0.00673707
ENSMUSG00000026678.10	Rgs5	862.933	0.963838	0.0195036	0.129238
ENSMUSG00000017144.8	Rnd3	285.058	0.963541	0.00107553	0.0129958
ENSMUSG00000029570.5	Lfng	116.889	0.963327	0.001655	0.0184224
ENSMUSG00000063765.11	Chadl	519.344	0.962793	0.000764523	0.00969329
ENSMUSG00000040136.9	Abcc8	149.486	0.961027	0.0157601	0.110798
ENSMUSG00000043789.7	Vwce	154.875	0.958189	0.0135938	0.0996165
ENSMUSG00000036896.5	C1qc	895.042	0.956886	2.98e-10	1.91e-08
ENSMUSG00000035692.6	Isg15	124.026	0.955781	0.00181724	0.0199101
ENSMUSG00000042286.13	Stab1	2371.3	0.953586	2.45e-05	0.000511869
ENSMUSG00000033436.13	Armcx2	564.096	0.952943	0.000264079	0.00399115
ENSMUSG00000029338.13	Antxr2	189.768	0.952655	0.000277245	0.00415452
ENSMUSG00000047037.5	Nipa1	82.3299	0.952404	7.36e-05	0.0013444
ENSMUSG00000020805.13	Slc13a5	178.324	0.950619	0.0147963	0.10578
ENSMUSG00000079442.12	St6galnac4	164.035	0.950288	1.85e-05	0.000405199
ENSMUSG00000019699.15	Akt3	60.037	0.949801	0.0019301	0.0209417
ENSMUSG00000068758.7	Il3ra	140.61	0.947929	0.00717894	0.0607751
ENSMUSG00000045763.7	Basp1	283.438	0.94681	0.00323361	0.0317211
ENSMUSG00000079057.3	Cyp4v3	306.686	0.942228	8.66e-05	0.00155007
ENSMUSG00000026389.16	Steap3	425.028	0.938588	4.56e-05	0.000880233
ENSMUSG00000026656.15	Fcgr2b	744.821	0.936095	4.02e-08	1.67e-06
ENSMUSG00000090213.1	Tmem189	332.746	0.935452	0.00012351	0.00210244
ENSMUSG00000095115.1	Itpripl2	565.084	0.934702	1.9e-05	0.000412527
ENSMUSG00000042842.10	Serpinb6b	70.9053	0.933758	0.00624047	0.0542046
ENSMUSG00000020598.15	Nrcam	270.223	0.933611	0.0236234	0.149457
ENSMUSG00000021589.12	Rhobtb3	267.438	0.933532	0.002691	0.0274157
ENSMUSG00000050777.7	Tmem37	143.183	0.933069	0.000743571	0.00948452
ENSMUSG00000023259.16	Slc26a6	109.636	0.93231	5.23e-06	0.000133652
ENSMUSG00000029270.10	Fam69a	88.5676	0.931181	9.68e-05	0.00170675
ENSMUSG00000000627.15	Sema4f	89.3464	0.928888	0.00213774	0.0229332
ENSMUSG00000044254.6	Pcsk9	111.633	0.928209	1.51e-05	0.000339323
ENSMUSG00000027797.15	Dclk1	83.9687	0.927905	0.00739573	0.0621679
ENSMUSG00000028538.12	St3gal3	128.206	0.924852	0.000477745	0.00656306
ENSMUSG00000033213.16	AA467197	62.3878	0.91882	0.0184674	0.124188
ENSMUSG00000024937.14	Ehbp1l1	415.797	0.918265	5.88e-08	2.35e-06
ENSMUSG00000031274.16	Col4a5	130.902	0.918138	0.00668228	0.0574133
ENSMUSG00000040751.12	Lat2	90.3851	0.916863	0.000201348	0.00317733
ENSMUSG00000015312.8	Gadd45b	680.248	0.91499	9.72e-05	0.00171303
ENSMUSG00000030621.17	Me3	330.868	0.913798	0.000336495	0.00489591
ENSMUSG00000003452.15	Bicd1	68.4717	0.908274	0.0202941	0.133408
ENSMUSG00000033355.5	Rtp4	110.994	0.90774	0.00395714	0.0376354
ENSMUSG00000043664.6	Tmem221	71.9536	0.901768	0.00253151	0.026169
ENSMUSG00000031990.14	Jam3	80.6751	0.900706	0.00106071	0.0128576
ENSMUSG00000000031.15	NA	202.972	0.899878	0.00239169	0.0249646
ENSMUSG00000021624.9	Cd180	180.76	0.899382	0.00103391	0.0125567
ENSMUSG00000030838.17	Ush1c	78.5255	0.898541	0.01615	0.112707
ENSMUSG00000032997.16	Chpf	482.305	0.897365	1.26e-05	0.000291814
ENSMUSG00000046718.7	Bst2	289.695	0.896511	0.000109462	0.00190244
ENSMUSG00000029923.4	Rab19	64.9194	0.895303	0.00127095	0.0149398
ENSMUSG00000034593.16	Myo5a	623.042	0.894576	0.00116891	0.0139383
ENSMUSG00000024912.5	Fosl1	225.465	0.893801	0.000835934	0.0104869
ENSMUSG00000026062.12	Slc9a2	166.555	0.892516	0.000456947	0.00631071
ENSMUSG00000060923.5	Acyp2	87.6427	0.892264	0.000438794	0.00610876
ENSMUSG00000040600.9	Eps8l3	55.8314	0.891854	0.0143164	0.10332
ENSMUSG00000009628.14	Tex15	1050.01	0.891525	0.0048131	0.0439742
ENSMUSG00000004631.15	Sgce	73.9009	0.890743	0.0140672	0.102024
ENSMUSG00000020227.10	Irak3	96.6184	0.890674	0.000195548	0.00310382
ENSMUSG00000035279.7	Ssc5d	106.248	0.890656	0.000825167	0.0103724
ENSMUSG00000021108.17	Prkch	219.526	0.889052	1.01e-06	3.07e-05
ENSMUSG00000004748.5	Mtfp1	50.0972	0.8888	0.00270505	0.0275145
ENSMUSG00000029304.14	Spp1	933.373	0.88759	6.56e-05	0.00121677
ENSMUSG00000029188.14	Slc34a2	202.851	0.887443	0.0045859	0.0422227
ENSMUSG00000046805.9	Mpeg1	1925.16	0.887411	8.11e-07	2.52e-05
ENSMUSG00000044352.6	Sowaha	101.37	0.887265	0.00168619	0.0186855
ENSMUSG00000002847.6	Pla1a	402.266	0.8859	0.000958383	0.0117368
ENSMUSG00000044055.5	Otos	181.775	0.883452	0.022317	0.143874
ENSMUSG00000024533.15	Spire1	127.382	0.883296	0.00604792	0.0529186
ENSMUSG00000086503.3	NA	1252.66	0.883139	0.00126435	0.0148805
ENSMUSG00000022371.15	Col14a1	1096.9	0.882604	1.19e-05	0.000277233
ENSMUSG00000029059.9	Fam213b	109.326	0.881756	0.000358222	0.00515739
ENSMUSG00000038692.8	Hoxb4	79.4679	0.880804	0.0079659	0.0658554
ENSMUSG00000008384.8	Sertad1	383.311	0.880761	0.00476085	0.0436014
ENSMUSG00000036905.8	C1qb	943.327	0.879333	8.58e-09	4.12e-07
ENSMUSG00000028931.11	Kcnab2	124.399	0.87903	0.000174167	0.00281612
ENSMUSG00000026832.12	Cytip	77.0268	0.875619	0.0129665	0.0962424
ENSMUSG00000025498.14	Irf7	258.399	0.874831	0.00309219	0.0305768
ENSMUSG00000075702.9	Selm	328.171	0.871915	2.19e-08	9.63e-07
ENSMUSG00000046108.3	Il17c	94.3873	0.870789	0.00813922	0.0668815
ENSMUSG00000050288.6	Fzd2	255.004	0.870053	2.62e-05	0.000543205
ENSMUSG00000054720.12	Lrrc8c	366.997	0.86987	3.87e-07	1.28e-05
ENSMUSG00000048251.15	Bcl11b	205.381	0.86954	0.000175372	0.0028284
ENSMUSG00000031379.13	Pir	225.685	0.868837	2.28e-06	6.32e-05
ENSMUSG00000020773.11	Trim47	231.066	0.865907	0.00490906	0.0447163
ENSMUSG00000032047.5	Acat1	364.524	0.865755	7.73e-06	0.000189198
ENSMUSG00000048699.4	Krt90	579.053	0.86317	0.0112841	0.0867665
ENSMUSG00000027297.14	Ltk	58.3745	0.863087	0.00368541	0.0355845
ENSMUSG00000097415.2	NA	459.758	0.862209	8.5e-09	4.09e-07
ENSMUSG00000006731.9	B4galnt1	811.952	0.862175	5.9e-10	3.59e-08
ENSMUSG00000052353.13	Cemip	1460.66	0.861698	2.1e-06	5.89e-05
ENSMUSG00000064202.15	4430402I18Rik	64.9033	0.861565	0.0040865	0.0385765
ENSMUSG00000001270.8	Ckb	195.789	0.861017	0.000109288	0.00190115
ENSMUSG00000021998.16	Lcp1	1004.75	0.860488	9.68e-05	0.00170675
ENSMUSG00000031883.12	Car7	202.471	0.857757	0.00157002	0.0177113
ENSMUSG00000059336.14	Slc14a1	74.6201	0.856232	0.0187312	0.125564
ENSMUSG00000031803.7	B3gnt3	85.4507	0.853437	0.0148592	0.106133
ENSMUSG00000053846.4	Lipg	78.6907	0.851484	0.0183611	0.12378
ENSMUSG00000019872.13	Smpdl3a	425.334	0.848945	0.000301719	0.00445809
ENSMUSG00000079037.9	Prnp	89.2305	0.848374	0.00373788	0.0359816
ENSMUSG00000026483.13	Fam129a	886.002	0.848016	4.68e-07	1.53e-05
ENSMUSG00000001870.15	Ltbp1	3139.62	0.844728	2.24e-08	9.78e-07
ENSMUSG00000010307.5	Tmem86a	465.115	0.841837	2.17e-06	6.05e-05
ENSMUSG00000028641.16	P3h1	133.682	0.841177	0.00153814	0.0174344
ENSMUSG00000045662.16	Henmt1	66.9388	0.840283	0.00116624	0.0139248
ENSMUSG00000001663.10	Gstt1	421.548	0.839951	7.18e-05	0.00131392
ENSMUSG00000028680.14	Plk3	571.57	0.83886	1.04e-05	0.000246292
ENSMUSG00000019987.8	Arg1	679.709	0.836484	0.00771693	0.0641875
ENSMUSG00000038028.9	Tigar	55.0788	0.832566	0.00501809	0.0454345
ENSMUSG00000031613.8	Hpgd	152.057	0.831524	0.00232998	0.0244705
ENSMUSG00000026435.15	Slc45a3	79.7877	0.831141	0.00503264	0.0454994
ENSMUSG00000073988.13	Ttpa	365.707	0.830701	2.42e-05	0.000506775
ENSMUSG00000022548.14	Apod	188.883	0.829858	0.0153841	0.108839
ENSMUSG00000025812.17	Pard3	208.629	0.829792	0.0415669	0.220081
ENSMUSG00000045314.5	Sowahb	121.463	0.829711	8.05e-05	0.00145219
ENSMUSG00000020101.14	Vsir	717.182	0.828376	2.75e-05	0.000568625
ENSMUSG00000032554.15	Trf	95.1901	0.827561	0.000271736	0.00408806
ENSMUSG00000029802.13	Abcg2	50.4569	0.824785	0.0344662	0.194061
ENSMUSG00000089726.2	NA	83.2464	0.824755	0.00163516	0.0182728
ENSMUSG00000028246.13	Faxc	184.779	0.823858	0.0457653	0.234228
ENSMUSG00000073902.5	NA	72.7261	0.822732	0.0163985	0.113939
ENSMUSG00000036887.5	C1qa	965.425	0.821439	2.13e-08	9.39e-07
ENSMUSG00000022489.5	Pde1b	123.386	0.820006	0.00801587	0.066091
ENSMUSG00000042659.14	Arrdc4	298.895	0.819598	7.41e-06	0.000181821
ENSMUSG00000023909.3	Paqr4	367.52	0.816396	1.74e-06	4.97e-05
ENSMUSG00000030862.12	Cpxm2	229.07	0.815905	0.0197511	0.130599
ENSMUSG00000027800.14	Tm4sf1	228.505	0.81517	0.0278663	0.167605
ENSMUSG00000021880.6	Rnase6	56.5452	0.810382	0.0256816	0.158529
ENSMUSG00000025083.17	Afap1l2	911.441	0.810352	0.001801	0.0197436
ENSMUSG00000002204.8	Napsa	64.3024	0.808629	0.0294393	0.173616
ENSMUSG00000032666.16	1700025G04Rik	95.5319	0.808164	0.0119114	0.090457
ENSMUSG00000027583.13	Zbtb46	63.2357	0.807705	0.00369279	0.0356376
ENSMUSG00000024401.14	Tnf	862.775	0.806576	8.16e-06	0.000198145
ENSMUSG00000026994.9	Galnt3	1094.24	0.80615	1.39e-11	1.17e-09
ENSMUSG00000028417.3	Tal2	118.034	0.805788	0.0210436	0.137376
ENSMUSG00000002458.13	Rgs19	262.93	0.805311	4.27e-07	1.41e-05
ENSMUSG00000028926.15	Cdk14	69.4685	0.805194	0.024135	0.151265
ENSMUSG00000021947.10	Cryl1	120.765	0.804498	0.0017764	0.0195528
ENSMUSG00000038642.10	Ctss	1082.26	0.804084	4.44e-08	1.82e-06
ENSMUSG00000000204.15	Slfn4	252.082	0.80403	0.0513322	0.253106
ENSMUSG00000050382.14	Kif7	504.693	0.802561	0.000148808	0.0024583
ENSMUSG00000027168.21	Pax6	199.041	0.800544	0.000520748	0.00706535
ENSMUSG00000020941.7	Map3k14	533.585	0.799371	2.97e-06	8.03e-05
ENSMUSG00000062391.3	NA	60.7866	0.798799	0.0156759	0.11041
ENSMUSG00000024042.6	Sik1	923.329	0.798546	0.00178693	0.0196059
ENSMUSG00000019832.3	Rab32	222.119	0.798428	0.0013585	0.0157933
ENSMUSG00000000244.16	Tspan32	109.716	0.798416	0.0130177	0.0965095
ENSMUSG00000026655.14	Fam107b	249.776	0.798131	0.0128888	0.0957779
ENSMUSG00000047821.16	Trim16	569.569	0.7975	1.15e-07	4.32e-06
ENSMUSG00000025473.16	Adam8	535.86	0.796813	0.00332149	0.0324994
ENSMUSG00000056708.5	Ier5	816.273	0.794533	7.02e-05	0.00129142
ENSMUSG00000042766.17	Trim46	99.4959	0.791964	0.00928364	0.0742964
ENSMUSG00000031903.6	Pla2g15	470.597	0.791931	5.09e-06	0.000130098
ENSMUSG00000028108.15	Ecm1	582.801	0.791221	0.00158677	0.0178368
ENSMUSG00000031451.5	Gas6	765.951	0.789879	1.33e-07	4.93e-06
ENSMUSG00000062593.15	Lilrb4a	306.238	0.789609	0.00238592	0.0249349
ENSMUSG00000034266.5	Batf	94.5039	0.786741	0.00699141	0.0594786
ENSMUSG00000075302.10	Erich2	87.0884	0.786488	0.000553114	0.00740768
ENSMUSG00000029484.12	Anxa3	647.135	0.785726	0.00647744	0.0559311
ENSMUSG00000056162.13	Cndp1	71.9475	0.784896	0.0055537	0.0492509
ENSMUSG00000055148.7	Klf2	772.255	0.783955	0.00264679	0.0270521
ENSMUSG00000021986.7	Amer2	272.743	0.783463	0.0201413	0.132541
ENSMUSG00000027078.14	Ube2l6	140.032	0.783026	0.00314088	0.0309871
ENSMUSG00000068220.5	Lgals1	240.78	0.782528	0.000587747	0.00780559
ENSMUSG00000041642.18	Kif21b	802.14	0.781851	0.000906791	0.0112205
ENSMUSG00000033885.14	Pxk	384.523	0.781257	6.28e-06	0.000156618
ENSMUSG00000030823.6	9130019O22Rik	91.6841	0.780408	0.00501273	0.0454345
ENSMUSG00000037410.13	Tbc1d2b	541.282	0.779667	5.93e-06	0.000148956
ENSMUSG00000024330.16	Col11a2	183.447	0.779395	0.000418469	0.0058861
ENSMUSG00000024247.14	Pkdcc	114.661	0.779373	0.0021666	0.0231774
ENSMUSG00000031431.13	Tsc22d3	509.752	0.779097	5.07e-05	0.000966689
ENSMUSG00000060216.15	Arrb2	672.382	0.777073	4.45e-09	2.27e-07
ENSMUSG00000061878.15	Sphk1	509.615	0.776774	2.5e-08	1.08e-06
ENSMUSG00000017002.14	Slpi	81.3556	0.775289	0.0414177	0.219805
ENSMUSG00000031385.14	Plxnb3	83.7506	0.774801	0.0350905	0.196645
ENSMUSG00000074364.5	Ehd2	185.53	0.774503	0.00583423	0.0513735
ENSMUSG00000024063.12	Lbh	2063.65	0.773373	3.32e-07	1.12e-05
ENSMUSG00000046223.10	Plaur	259.969	0.770013	0.0148846	0.106133
ENSMUSG00000001741.11	Il16	89.2096	0.768692	0.000878823	0.0109384
ENSMUSG00000037185.8	Krt80	78.0418	0.768429	0.0216082	0.140255
ENSMUSG00000026211.17	Obsl1	314.383	0.766862	0.000201923	0.00318376
ENSMUSG00000026829.9	Gbgt1	72.714	0.766531	0.00155449	0.0175882
ENSMUSG00000020473.13	Aebp1	398.012	0.765659	0.00278483	0.0281456
ENSMUSG00000085139.1	A730046J19Rik	74.0871	0.762619	0.00579149	0.0510703
ENSMUSG00000062421.13	Arf2	398.12	0.761724	4.78e-07	1.56e-05
ENSMUSG00000042331.13	Specc1	360.446	0.759113	0.0010736	0.0129889
ENSMUSG00000054598.13	9130230L23Rik	55.1296	0.758127	0.0477212	0.240691
ENSMUSG00000036908.16	Unc93b1	1213.43	0.757474	6.9e-09	3.39e-07
ENSMUSG00000024087.3	Cyp1b1	3301.34	0.757219	0.000432502	0.00603885
ENSMUSG00000049493.13	Pls1	288.409	0.757181	0.0274122	0.16556
ENSMUSG00000031562.15	Dctd	157.771	0.756644	0.0099031	0.0781456
ENSMUSG00000033420.12	Antxr1	606.857	0.754897	0.00383578	0.0366644
ENSMUSG00000029163.9	Emilin1	201.977	0.753421	0.0136199	0.099723
ENSMUSG00000022769.7	Sdf2l1	287.484	0.751903	7.95e-05	0.00144141
ENSMUSG00000037762.6	Slc16a9	144.523	0.750249	0.00448487	0.0415134
ENSMUSG00000050666.13	Vstm4	479.238	0.750235	0.0132282	0.0976458
ENSMUSG00000006403.12	Adamts4	77.2018	0.743148	0.0186222	0.125052
ENSMUSG00000029084.5	Cd38	240.093	0.742613	0.00117949	0.0140556
ENSMUSG00000059479.7	B3gnt8	67.1199	0.742369	0.0066947	0.0574681
ENSMUSG00000016496.7	Cd274	215.855	0.741623	0.0146732	0.105058
ENSMUSG00000031089.7	Slc6a14	544.343	0.741619	9.23e-07	2.84e-05
ENSMUSG00000021725.8	Parp8	343.232	0.740749	6.31e-05	0.00117457
ENSMUSG00000022951.15	Rcan1	411.359	0.739862	0.000134585	0.00225665
ENSMUSG00000019539.10	Rcn3	159.961	0.738863	0.00782003	0.0649032
ENSMUSG00000027074.14	Slc43a3	110.273	0.738041	0.0243767	0.152402
ENSMUSG00000016206.6	H2-M3	279.549	0.737996	0.00373732	0.0359816
ENSMUSG00000037411.10	Serpine1	223.959	0.736937	0.0192524	0.128038
ENSMUSG00000018774.13	Cd68	664.219	0.735952	0.000152009	0.0025025
ENSMUSG00000025586.16	Cpeb1	74.904	0.734563	0.01142	0.0875641
ENSMUSG00000004961.7	Syt5	239.586	0.73421	0.0224102	0.144263
ENSMUSG00000032252.14	Glce	1310.41	0.733757	9.02e-07	2.78e-05
ENSMUSG00000039304.11	Tnfsf10	75.9308	0.733349	0.0413717	0.219672
ENSMUSG00000039903.16	Eva1c	218.6	0.733013	0.0126704	0.0946725
ENSMUSG00000057069.6	Ero1lb	185.918	0.732866	0.000700501	0.00903812
ENSMUSG00000070942.8	Il1rl2	116.909	0.730617	0.00379998	0.0364275
ENSMUSG00000027186.14	Elf5	930.968	0.729736	0.000163881	0.0026817
ENSMUSG00000036943.8	Rab8b	589.996	0.729397	1.65e-06	4.78e-05
ENSMUSG00000032526.10	Deb1	188.381	0.729282	0.000652797	0.00853254
ENSMUSG00000028793.15	Rnf19b	648.894	0.728953	2.44e-07	8.52e-06
ENSMUSG00000028278.14	Rragd	2008.48	0.728673	1.64e-07	5.91e-06
ENSMUSG00000027347.18	Rasgrp1	67.5419	0.728236	0.00530881	0.0475221
ENSMUSG00000033538.13	Casp4	146.37	0.726474	0.000209374	0.00328762
ENSMUSG00000041674.16	NA	2672.96	0.726325	0.000517538	0.00704022
ENSMUSG00000038295.14	Atg9b	123.054	0.724536	0.0304732	0.17784
ENSMUSG00000079547.3	H2-DMb1	220.013	0.724479	9.16e-05	0.00163002
ENSMUSG00000022353.9	Mtss1	709.962	0.723957	0.00223678	0.0237721
ENSMUSG00000068794.6	Col28a1	77.0659	0.723289	0.0633166	0.290917
ENSMUSG00000042129.8	Rassf4	652.83	0.722791	0.000545556	0.00731675
ENSMUSG00000031402.12	Mpp1	308.28	0.722624	8.88e-06	0.000214102
ENSMUSG00000024713.15	Pcsk5	394.186	0.722392	0.00135113	0.0157172
ENSMUSG00000056492.5	Adgrf5	62.7449	0.722113	0.036811	0.203058
ENSMUSG00000029596.13	Sdsl	231.892	0.720874	0.000426431	0.0059716
ENSMUSG00000004151.16	Etv1	420.927	0.719727	5.67e-05	0.00106899
ENSMUSG00000001627.11	Ifrd1	935.368	0.718977	0.000407501	0.00576592
ENSMUSG00000025584.17	Pde8a	97.1244	0.718511	0.000860085	0.0107403
ENSMUSG00000048612.15	Myof	1245.83	0.717376	0.00338342	0.0330204
ENSMUSG00000070780.11	Rbm47	653.563	0.714428	0.00146788	0.0168082
ENSMUSG00000061527.6	Krt5	96.3107	0.71043	0.0825212	0.343721
ENSMUSG00000034595.17	Ppp1r18	353.214	0.709589	0.000230411	0.00356469
ENSMUSG00000029343.17	Crybb1	66.9959	0.709527	0.00866677	0.0703057
ENSMUSG00000079445.3	B3gnt7	162.236	0.709276	0.00254641	0.0262945
ENSMUSG00000027360.5	Hdc	167.252	0.706917	0.00897788	0.0723362
ENSMUSG00000083041.2	NA	56.266	0.706908	0.0209944	0.13721
ENSMUSG00000020057.2	Dram1	167.752	0.70627	0.0474924	0.239869
ENSMUSG00000094732.1	NA	50.2043	0.705954	0.0450439	0.232039
ENSMUSG00000061462.15	Obscn	143.237	0.705438	0.00589011	0.051752
ENSMUSG00000086515.1	NA	54.5091	0.704677	0.0120865	0.0914282
ENSMUSG00000021765.7	Fst	94.3093	0.70396	0.0842026	0.347983
ENSMUSG00000028033.16	Kcnq5	149.846	0.703366	0.0143162	0.10332
ENSMUSG00000039206.13	Daglb	320.823	0.70304	2.27e-05	0.000480106
ENSMUSG00000043445.6	Pgp	283.219	0.70061	0.00217515	0.0232297
ENSMUSG00000022126.6	Acod1	119.159	0.699508	0.0680575	0.304324
ENSMUSG00000032565.8	Nudt16	83.4716	0.699003	0.0032934	0.0322743
ENSMUSG00000041653.4	Pnpla3	134.725	0.698051	0.000640213	0.00838534
ENSMUSG00000050721.8	Plekho2	466.768	0.697517	0.00720808	0.0608594
ENSMUSG00000020658.9	Efr3b	122.205	0.697461	0.00201042	0.0217018
ENSMUSG00000044921.4	Rassf9	168.915	0.696102	0.00264638	0.0270521
ENSMUSG00000044122.14	Proca1	59.2163	0.694991	0.02862	0.170422
ENSMUSG00000000489.6	Pdgfb	421.023	0.69471	0.00993521	0.0783251
ENSMUSG00000046879.6	Irgm1	388.962	0.69439	6.19e-05	0.00115234
ENSMUSG00000026879.14	Gsn	1650.3	0.693498	0.00191976	0.0208771
ENSMUSG00000021091.8	Serpina3n	154.222	0.693351	0.0438567	0.227981
ENSMUSG00000040152.8	Thbs1	4265.9	0.693265	2.19e-06	6.08e-05
ENSMUSG00000035551.6	Igfbpl1	59.5819	0.693007	0.0654317	0.296766
ENSMUSG00000021474.8	Sfxn1	394.552	0.692891	8.11e-05	0.00146015
ENSMUSG00000037820.15	Tgm2	897.393	0.692354	2.14e-06	5.97e-05
ENSMUSG00000026175.12	Vil1	886.58	0.691876	0.0048222	0.0440361
ENSMUSG00000003617.16	Cp	3335.29	0.69106	0.00224817	0.0238445
ENSMUSG00000036249.16	Rbm43	103.526	0.689566	0.015165	0.107648
ENSMUSG00000035769.8	Xylb	77.6251	0.689197	0.0321184	0.18411
ENSMUSG00000079499.9	NA	1342.17	0.68724	8.52e-05	0.00153027
ENSMUSG00000028041.17	Adam15	540.236	0.687055	0.000172962	0.00280746
ENSMUSG00000017830.15	Dhx58	148.177	0.68687	0.00578111	0.0510061
ENSMUSG00000067996.5	Bpifb9b	55.6071	0.684367	0.0658894	0.297805
ENSMUSG00000056121.15	Fez2	198.452	0.684205	0.000212162	0.00332497
ENSMUSG00000030256.11	Bhlhe41	150.099	0.682312	0.0340747	0.19254
ENSMUSG00000023243.8	Kcnk5	882.379	0.680194	0.000889027	0.011051
ENSMUSG00000002108.10	Nr1h3	236.928	0.678476	0.000307533	0.00452292
ENSMUSG00000063239.16	Grm4	233.068	0.676704	5.67e-05	0.00106907
ENSMUSG00000033597.8	Caskin1	132.44	0.674927	0.0418707	0.220949
ENSMUSG00000090582.1	NA	104.952	0.674635	0.0445479	0.23019
ENSMUSG00000020641.15	Rsad2	179.866	0.674244	0.0666875	0.300031
ENSMUSG00000024659.14	Anxa1	902.158	0.673266	0.00596305	0.0522962
ENSMUSG00000032531.15	Amotl2	1940.45	0.673154	1.62e-08	7.34e-07
ENSMUSG00000066392.11	Nrxn3	84.0084	0.671925	0.0159948	0.111952
ENSMUSG00000028023.16	Pitx2	884.043	0.670166	1.96e-09	1.06e-07
ENSMUSG00000045980.13	Tmem104	347.396	0.669727	0.000200394	0.0031649
ENSMUSG00000037685.15	Atp8a1	973.687	0.66966	0.00483442	0.0441054
ENSMUSG00000026873.9	Phf19	147.482	0.669183	0.0210989	0.137606
ENSMUSG00000032596.14	Uba7	869.591	0.669094	0.000394095	0.00560121
ENSMUSG00000021071.15	Trim9	1401.7	0.669084	0.00868448	0.0703594
ENSMUSG00000032440.12	Tgfbr2	1417.09	0.66789	1.21e-06	3.63e-05
ENSMUSG00000038298.14	Pdzk1	188.905	0.667816	0.00773545	0.0643134
ENSMUSG00000025648.17	Pfkfb4	198.446	0.66609	3.48e-05	0.000693608
ENSMUSG00000022382.14	Wnt7b	433.486	0.665726	0.0265939	0.162058
ENSMUSG00000026870.19	Cutal	192.389	0.664581	0.0380684	0.207826
ENSMUSG00000038301.15	Snx10	534.936	0.662269	0.000727713	0.00931972
ENSMUSG00000026819.15	Slc25a25	895.807	0.661896	0.000190003	0.0030271
ENSMUSG00000019846.11	Lama4	637.856	0.661837	0.0193347	0.128432
ENSMUSG00000034652.12	Cd300a	94.2562	0.659819	0.032612	0.186546
ENSMUSG00000057719.10	Sh3rf2	217.866	0.659562	0.065232	0.296143
ENSMUSG00000027996.13	Sfrp2	70.0368	0.659339	0.041714	0.220415
ENSMUSG00000058173.11	Smco4	54.4376	0.659243	0.0502409	0.249448
ENSMUSG00000031851.14	Ntpcr	256.69	0.658801	0.000608965	0.00805366
ENSMUSG00000036246.14	Gmip	485.97	0.657843	5.29e-06	0.000134704
ENSMUSG00000035561.5	Aldh1b1	1855.27	0.657644	0.00456708	0.0420902
ENSMUSG00000045932.12	Ifit2	188.807	0.656776	0.0349562	0.196147
ENSMUSG00000025780.7	Itih5	319.328	0.656741	0.0365087	0.201974
ENSMUSG00000000753.15	Serpinf1	346.255	0.653839	0.0478697	0.241008
ENSMUSG00000026589.14	Sec16b	184.73	0.653643	0.0265827	0.162042
ENSMUSG00000000340.10	Dbt	1062.84	0.653378	1.33e-08	6.05e-07
ENSMUSG00000073771.11	Btbd19	166.567	0.652483	0.0108885	0.0843038
ENSMUSG00000023341.14	Mx2	53.5614	0.650479	0.0230308	0.147031
ENSMUSG00000022176.11	Rem2	549.977	0.650264	8.04e-06	0.000195507
ENSMUSG00000023143.10	Nagpa	266.773	0.650109	1.66e-05	0.000368266
ENSMUSG00000028654.13	Mycl	726.324	0.650042	0.00311289	0.0307428
ENSMUSG00000025981.13	Coq10b	428.461	0.649677	0.000273861	0.00411353
ENSMUSG00000027624.17	Epb41l1	300.541	0.64953	0.00143724	0.0165671
ENSMUSG00000026249.10	Serpine2	78.5059	0.649432	0.0220263	0.142241
ENSMUSG00000024610.14	Cd74	1363.08	0.649284	1.95e-08	8.69e-07
ENSMUSG00000105565.1	NA	62.9347	0.648853	0.0346008	0.194561
ENSMUSG00000068245.14	Phf11d	124.809	0.647517	0.0086805	0.0703572
ENSMUSG00000031434.15	Morc4	495.895	0.646986	0.00780687	0.0648222
ENSMUSG00000029135.10	Fosl2	1677.22	0.646263	0.00847855	0.0691325
ENSMUSG00000028626.5	Col9a2	964.943	0.645888	0.00230064	0.0242703
ENSMUSG00000089672.4	Lilr4b	269.676	0.645471	0.046279	0.235869
ENSMUSG00000020642.12	Rnf144a	1074.14	0.644742	0.0127707	0.0952349
ENSMUSG00000024867.14	Pip5k1b	124.88	0.644072	0.0053157	0.0475614
ENSMUSG00000074158.9	9830147E19Rik	215.551	0.642098	0.00928001	0.0742964
ENSMUSG00000032024.10	Clmp	268.601	0.642026	0.0191995	0.127892
ENSMUSG00000058013.11	40787	699.849	0.640766	3.87e-05	0.000762136
ENSMUSG00000042677.7	Zc3h12a	531.513	0.640201	0.00144429	0.016608
ENSMUSG00000025402.12	Nab2	186.004	0.639861	0.00867317	0.0703277
ENSMUSG00000039883.5	Lrrc17	92.3668	0.639142	0.00514276	0.0463189
ENSMUSG00000052085.6	Dock8	564.073	0.638954	0.00437939	0.0407152
ENSMUSG00000040722.6	Scamp5	513.174	0.637098	0.000743098	0.00948452
ENSMUSG00000054920.12	Klhl5	812.816	0.63686	0.000124596	0.00211524
ENSMUSG00000002881.14	Nab1	413.659	0.636446	0.00127553	0.0149844
ENSMUSG00000055639.16	Dach1	645.676	0.634101	0.00675737	0.0579538
ENSMUSG00000035451.6	Foxa1	1274.58	0.634065	0.000165884	0.00270749
ENSMUSG00000015501.10	Hivep2	536.498	0.633181	0.0106717	0.082895
ENSMUSG00000071265.9	NA	51.8119	0.631754	0.0248974	0.154793
ENSMUSG00000074785.4	Plxnc1	167.389	0.630605	0.0236903	0.149635
ENSMUSG00000018899.16	Irf1	1534.91	0.629187	0.00738884	0.0621374
ENSMUSG00000046731.4	Kctd11	346.199	0.628687	1.6e-05	0.000356996
ENSMUSG00000024381.15	Bin1	907.234	0.627951	0.000436951	0.00609091
ENSMUSG00000034926.3	Dhcr24	1705.73	0.626957	0.00966095	0.0766073
ENSMUSG00000097258.1	NA	73.0825	0.626362	0.0124845	0.093688
ENSMUSG00000035783.8	Acta2	51.9215	0.625366	0.0701702	0.310055
ENSMUSG00000031075.17	Ano1	2124.99	0.62521	0.0136377	0.099723
ENSMUSG00000046598.14	Bdh1	367.095	0.625165	0.000345154	0.00499896
ENSMUSG00000091017.1	Fam71a	456.487	0.624252	0.036538	0.20202
ENSMUSG00000055415.7	Atp10b	331.555	0.624096	0.0421767	0.221669
ENSMUSG00000028024.14	Enpep	93.9587	0.621794	0.0983422	0.383671
ENSMUSG00000025726.11	Slc28a1	295.637	0.621704	0.00803778	0.0662195
ENSMUSG00000018861.8	Fdxr	232	0.621619	0.00246294	0.0255574
ENSMUSG00000046157.13	Tmem229b	957.002	0.621271	0.00261523	0.0268144
ENSMUSG00000023947.7	Nfkbie	681.543	0.619715	0.000147676	0.00244172
ENSMUSG00000033770.13	Clcnka	557.295	0.619341	0.0074555	0.0625598
ENSMUSG00000022867.9	Usp25	1009.58	0.618089	1.66e-06	4.79e-05
ENSMUSG00000036306.11	Lzts1	85.9914	0.617222	0.104166	0.396794
ENSMUSG00000032010.14	Usp2	142.751	0.616265	0.0501998	0.249348
ENSMUSG00000056749.7	Nfil3	559.406	0.615067	0.00429854	0.0401598
ENSMUSG00000007617.17	Homer1	384.945	0.613315	0.000222975	0.00346121
ENSMUSG00000038517.15	Tbkbp1	117.349	0.613226	0.00646345	0.0558357
ENSMUSG00000006782.16	Cnp	1144.61	0.613134	2.17e-05	0.000463344
ENSMUSG00000025316.16	Banp	388.591	0.61278	5.89e-05	0.00110455
ENSMUSG00000028357.12	Kif12	143.758	0.610446	0.0180355	0.122234
ENSMUSG00000105509.1	NA	97.3956	0.609953	0.0122728	0.0923909
ENSMUSG00000051498.6	Tlr6	59.9333	0.609678	0.0288814	0.171236
ENSMUSG00000028476.13	Reck	130.169	0.609606	0.0122272	0.0921934
ENSMUSG00000039106.6	Htr5a	71.729	0.609383	0.0733729	0.318435
ENSMUSG00000028992.13	Nmnat1	176.995	0.609211	0.000857073	0.0107098
ENSMUSG00000036412.5	Arsi	727.789	0.60903	0.00449882	0.0415819
ENSMUSG00000042770.8	Hebp1	80.8277	0.608285	0.0459903	0.234837
ENSMUSG00000020785.17	Camkk1	57.1485	0.608039	0.0597739	0.279636
ENSMUSG00000033488.11	BC026585	326.385	0.607705	0.032924	0.187823
ENSMUSG00000027952.16	Pmvk	272.286	0.607367	0.00166025	0.0184557
ENSMUSG00000031155.14	Pim2	244.049	0.607276	0.0275902	0.166372
ENSMUSG00000038507.6	Parp12	453.057	0.606422	1.03e-05	0.000243732
ENSMUSG00000000386.14	Mx1	96.8455	0.606374	0.0219287	0.141754
ENSMUSG00000030123.15	Plxnd1	402.607	0.60536	0.0331385	0.188877
ENSMUSG00000030761.15	Myo7a	442.765	0.604682	0.00718701	0.0607826
ENSMUSG00000032657.15	Fam189b	278.527	0.604381	0.0215043	0.139773
ENSMUSG00000034457.10	Eda2r	98.4556	0.603989	0.0778072	0.330672
ENSMUSG00000001120.15	Pcbp3	230.543	0.602909	0.0434803	0.226581
ENSMUSG00000000202.9	Btbd17	847.082	0.600481	0.0167049	0.115517
ENSMUSG00000005583.16	Mef2c	276.457	0.599838	7.98e-05	0.00144487
ENSMUSG00000027995.10	Tlr2	1203.44	0.597931	3.25e-05	0.000659582
ENSMUSG00000042788.12	Fam166b	91.0621	0.597672	0.0615509	0.285353
ENSMUSG00000038045.14	Sult6b1	97.728	0.597438	0.041875	0.220949
ENSMUSG00000038718.15	Pbx3	381.212	0.596979	0.00279678	0.0282214
ENSMUSG00000026317.7	Cln8	595.619	0.595595	2.58e-07	8.91e-06
ENSMUSG00000031355.16	Arhgap6	109.612	0.595238	0.0651291	0.295888
ENSMUSG00000085028.2	NA	263.697	0.594332	0.00374759	0.0360551
ENSMUSG00000092035.8	Peg10	57.195	0.593109	NA	NA
ENSMUSG00000037370.13	Enpp1	519.735	0.592504	0.00156861	0.0177059
ENSMUSG00000041801.5	Phlda3	116.343	0.591207	0.053561	0.260296
ENSMUSG00000020275.9	Rel	742.34	0.590155	0.0043689	0.0406552
ENSMUSG00000032135.14	Mcam	156.449	0.588943	0.0806774	0.338188
ENSMUSG00000032431.6	Crtap	223.057	0.588451	0.00116485	0.0139248
ENSMUSG00000032548.14	Slco2a1	145.392	0.58791	0.134027	0.458678
ENSMUSG00000025578.9	Cbx8	482.547	0.587808	0.00444526	0.0412069
ENSMUSG00000053137.6	Mapk11	125.961	0.585458	0.0800955	0.336787
ENSMUSG00000041301.15	Cftr	75.6584	0.585185	0.137834	0.466582
ENSMUSG00000046295.13	Ankle1	292.51	0.584731	0.00733428	0.0617332
ENSMUSG00000019850.11	Tnfaip3	1710.15	0.584227	0.0134231	0.0986312
ENSMUSG00000032373.14	Car12	552.527	0.583394	0.0638336	0.292234
ENSMUSG00000035372.1	1810055G02Rik	263.264	0.58293	0.00170722	0.0188787
ENSMUSG00000029822.15	Osbpl3	231.513	0.582856	0.0968362	0.379664
ENSMUSG00000034118.15	Tpst1	215.972	0.582775	0.000205574	0.00323329
ENSMUSG00000031749.12	St3gal2	606.922	0.582258	0.000386061	0.00549524
ENSMUSG00000032528.4	Vipr1	579.361	0.581703	0.0352062	0.196897
ENSMUSG00000046719.7	Nxph3	82.6337	0.579519	0.0399576	0.214845
ENSMUSG00000063931.14	Pepd	867.601	0.577558	2.01e-06	5.65e-05
ENSMUSG00000024053.10	Emilin2	445.225	0.577545	0.0694588	0.308128
ENSMUSG00000034848.17	Ttc21b	300.416	0.577453	0.00770433	0.0641681
ENSMUSG00000022094.15	Slc39a14	565.623	0.577111	0.0003702	0.00530518
ENSMUSG00000035299.16	Mid1	88.1472	0.57701	0.136063	0.462975
ENSMUSG00000025647.16	Shisa5	800.09	0.575369	0.00011303	0.00195908
ENSMUSG00000032508.8	Myd88	287.937	0.575294	0.000792167	0.0100242
ENSMUSG00000075304.2	Sp5	540.89	0.575201	0.00256715	0.026456
ENSMUSG00000027384.6	Ndufaf5	130.088	0.574051	0.00257983	0.0265385
ENSMUSG00000070880.10	Gad1	682.227	0.573529	0.00548597	0.0487411
ENSMUSG00000028063.15	Lmna	1656.81	0.572395	0.00656421	0.0566033
ENSMUSG00000021265.3	Slc25a29	179.8	0.571776	0.00930366	0.0743941
ENSMUSG00000106734.3	NA	286.425	0.571551	0.0224604	0.144374
ENSMUSG00000022817.14	Itgb5	845.956	0.571109	0.000236223	0.00363719
ENSMUSG00000038059.6	Smim3	934.609	0.569881	0.00013053	0.00220028
ENSMUSG00000089989.9	Flt3l	68.9569	0.568911	0.0252332	0.156472
ENSMUSG00000038390.11	Gpr162	109.671	0.567311	0.0216049	0.140255
ENSMUSG00000026728.9	Vim	1298.09	0.567198	0.00224978	0.0238445
ENSMUSG00000026896.14	Ifih1	328.285	0.565905	0.0005689	0.00758175
ENSMUSG00000047591.4	Mafa	85.7463	0.565764	0.045157	0.232082
ENSMUSG00000027533.10	Fabp5	54.9819	0.56514	0.128951	0.448495
ENSMUSG00000031486.14	Adgra2	60.5799	0.565132	0.0402361	0.215578
ENSMUSG00000024538.7	Ppic	141.525	0.564418	0.0803881	0.33736
ENSMUSG00000046768.13	Rhoj	405.847	0.564088	0.00554687	0.0492133
ENSMUSG00000024206.14	Rfx2	101.345	0.562693	0.0217447	0.140852
ENSMUSG00000041762.16	Gpr155	685.589	0.561979	0.000742572	0.00948449
ENSMUSG00000054517.9	Trim65	165.292	0.560608	0.00137338	0.0159565
ENSMUSG00000026825.17	Dnm1	507.131	0.558742	0.000460614	0.00635213
ENSMUSG00000036580.15	Spg20	699.287	0.558673	0.0028466	0.0286633
ENSMUSG00000032549.7	Rab6b	415.493	0.557232	0.0258557	0.1595
ENSMUSG00000053716.9	Dusp7	191.738	0.556659	0.00673768	0.057811
ENSMUSG00000026479.13	Lamc2	538.672	0.554641	0.0023927	0.0249646
ENSMUSG00000035004.2	Igsf6	209.982	0.554491	0.0302558	0.17706
ENSMUSG00000105838.1	NA	170.91	0.554208	0.028954	0.171445
ENSMUSG00000044707.7	Ccnjl	124.173	0.553647	0.0244083	0.15255
ENSMUSG00000033453.7	Adamts15	145.558	0.551658	0.0634709	0.291344
ENSMUSG00000057880.12	Abat	90.6489	0.551139	NA	NA
ENSMUSG00000053897.15	Slc39a8	1092.14	0.550729	0.0106491	0.0828213
ENSMUSG00000021892.14	Sh3bp5	120.087	0.550469	0.0134107	0.0985783
ENSMUSG00000038332.12	Sesn1	428.801	0.550229	8.01e-05	0.00144912
ENSMUSG00000041939.14	Mvk	343.219	0.549776	0.00146198	0.0167709
ENSMUSG00000047793.13	Sned1	103.864	0.549563	0.126745	0.445035
ENSMUSG00000041845.10	Rhod	107.671	0.549183	0.0132331	0.0976458
ENSMUSG00000019647.16	Sema6a	1500.22	0.548075	2e-05	0.000431508
ENSMUSG00000031962.5	Cdh15	173.285	0.547933	0.170496	0.521937
ENSMUSG00000025225.14	Nfkb2	1182.89	0.547832	3.98e-05	0.000779381
ENSMUSG00000039774.12	Galnt12	900.37	0.547363	0.000106595	0.0018577
ENSMUSG00000031805.17	Jak3	785.026	0.546851	0.000306347	0.00451287
ENSMUSG00000055044.12	Pdlim1	62.9851	0.546696	0.158856	0.502273
ENSMUSG00000086296.2	NA	253.002	0.546172	0.0559397	0.267485
ENSMUSG00000026833.18	Olfm1	324.475	0.544924	0.0980252	0.382749
ENSMUSG00000028358.15	Zfp618	90.5418	0.544788	0.148693	0.485402
ENSMUSG00000049556.4	Lingo1	54.6667	0.543847	0.0775336	0.329898
ENSMUSG00000023206.16	Il15ra	144.151	0.543785	0.0365096	0.201974
ENSMUSG00000033016.15	Nfatc1	577.758	0.543529	0.000230578	0.00356469
ENSMUSG00000029471.13	Camkk2	212.035	0.543508	0.0530005	0.25843
ENSMUSG00000020810.5	Cygb	174.022	0.541975	0.00862826	0.070083
ENSMUSG00000041268.16	Dmxl2	209.056	0.541861	0.0706349	0.311077
ENSMUSG00000029003.11	Mad2l2	211.237	0.540971	0.00532974	0.0476422
ENSMUSG00000024338.14	Psmb8	620.134	0.539835	0.0112995	0.0868502
ENSMUSG00000038213.7	Tapbpl	580.511	0.53982	0.000450876	0.00623857
ENSMUSG00000023284.15	Zfp605	141.109	0.539443	0.0199485	0.131454
ENSMUSG00000047143.3	Dmrta2	249.569	0.538686	0.0236472	0.149481
ENSMUSG00000056091.12	St3gal5	684.118	0.538604	0.00266091	0.0271767
ENSMUSG00000006360.11	Crip1	496.706	0.53698	0.00267517	0.0272982
ENSMUSG00000079235.10	Ccdc13	157.894	0.536778	0.0405626	0.2169
ENSMUSG00000026104.14	Stat1	525.244	0.536367	0.0058822	0.0517063
ENSMUSG00000036473.15	Tbc1d24	384.549	0.536249	0.0308917	0.179511
ENSMUSG00000024222.16	Fkbp5	150.481	0.535964	0.04009	0.215124
ENSMUSG00000002059.17	Rab34	699.166	0.535473	2.95e-06	7.99e-05
ENSMUSG00000034863.7	Ano8	508.348	0.53508	7.04e-05	0.00129255
ENSMUSG00000074805.5	NA	728.765	0.534156	0.195196	0.557769
ENSMUSG00000022456.15	37865	54.3881	0.533481	0.149048	0.485874
ENSMUSG00000057191.13	AB124611	173.584	0.532158	0.0267361	0.16256
ENSMUSG00000020834.17	Dhrs13	143.524	0.530501	0.0177838	0.121014
ENSMUSG00000096145.2	Vkorc1	59.6603	0.530445	0.0394847	0.213112
ENSMUSG00000020656.15	Grhl1	245.415	0.529412	0.103139	0.393987
ENSMUSG00000055717.13	Slain1	851.045	0.529174	0.000126074	0.00213652
ENSMUSG00000018983.9	E2f2	87.6256	0.529059	0.0235282	0.149147
ENSMUSG00000017561.16	Crlf3	312.19	0.528897	0.000191499	0.00304718
ENSMUSG00000028789.16	Azin2	137.242	0.528096	0.0287244	0.170776
ENSMUSG00000018909.15	Arrb1	763.637	0.527352	0.00292935	0.0293568
ENSMUSG00000047735.14	Samd9l	1070.34	0.526613	0.0290249	0.171758
ENSMUSG00000054843.8	Atrnl1	302.274	0.525499	0.0880375	0.358001
ENSMUSG00000060639.5	Hist1h4i	80.4619	0.525358	0.0767827	0.327635
ENSMUSG00000054676.15	1600014C10Rik	263.019	0.525153	0.00105192	0.0127591
ENSMUSG00000085148.1	NA	195.782	0.524259	0.0372926	0.20469
ENSMUSG00000038552.14	Fndc4	142.432	0.52407	0.0110718	0.0853755
ENSMUSG00000021665.7	Hexb	662.289	0.523584	1.07e-05	0.000251524
ENSMUSG00000079481.11	Nhsl2	56.0851	0.523445	0.131654	0.453696
ENSMUSG00000025154.14	Arhgap19	412.441	0.523298	0.00041415	0.00584303
ENSMUSG00000036782.13	Klhl13	277.236	0.522553	0.0165742	0.114909
ENSMUSG00000039621.13	Prex1	829.355	0.522455	0.01991	0.131337
ENSMUSG00000045176.3	Borcs6	236.162	0.521893	0.0138736	0.100928
ENSMUSG00000066152.11	Slc31a2	312.028	0.521718	0.00188802	0.0205436
ENSMUSG00000046733.7	Gprc5a	1020.8	0.521583	0.00033262	0.00485437
ENSMUSG00000032012.7	Nectin1	279.563	0.521489	0.0374237	0.205248
ENSMUSG00000029047.13	Pex10	161.987	0.521004	0.00491824	0.0447628
ENSMUSG00000011171.11	Vipr2	85.0714	0.520902	0.0866897	0.354413
ENSMUSG00000084899.1	NA	54.8469	0.520889	0.0524972	0.256898
ENSMUSG00000029413.14	Naaa	240.441	0.52052	0.00852483	0.0693895
ENSMUSG00000058056.15	Palld	57.535	0.519746	0.173451	0.527056
ENSMUSG00000048878.6	Hexim1	1567.24	0.518896	0.000332148	0.00485437
ENSMUSG00000062296.8	Trank1	285.083	0.518814	0.207084	0.572823
ENSMUSG00000027485.15	Bpifb1	258.999	0.518801	0.015341	0.108614
ENSMUSG00000015605.5	Srf	1079.84	0.517871	2.35e-05	0.000494455
ENSMUSG00000024409.8	Psors1c2	50.5605	0.516902	0.115244	0.420316
ENSMUSG00000033192.4	Lpcat2	796.091	0.516156	2.19e-05	0.000465438
ENSMUSG00000004665.10	Cnn2	349.694	0.51584	0.0181093	0.122603
ENSMUSG00000030048.5	Gkn3	308.711	0.515557	0.137825	0.466582
ENSMUSG00000071984.10	Fndc1	383.427	0.515207	0.086405	0.353781
ENSMUSG00000029401.8	Rilpl2	381.103	0.515092	0.00949222	0.0755843
ENSMUSG00000044948.16	Cfap43	2126.56	0.514578	0.000943234	0.0115811
ENSMUSG00000032193.8	Ldlr	989.582	0.514222	0.00290682	0.029177
ENSMUSG00000074923.10	Pak6	251.597	0.514142	0.0214335	0.139501
ENSMUSG00000030087.11	Klf15	216.436	0.513582	0.0199185	0.131348
ENSMUSG00000048537.15	Phldb1	1100.28	0.51305	0.000165197	0.00269859
ENSMUSG00000021619.5	Atg10	92.5497	0.513018	0.0369521	0.203777
ENSMUSG00000037447.16	Arid5a	1781.17	0.512601	0.0260971	0.160574
ENSMUSG00000009013.5	Dynll1	263.942	0.51067	0.0126286	0.094434
ENSMUSG00000026749.11	Nek6	378.774	0.51032	0.00146652	0.0168028
ENSMUSG00000040430.18	Pitpnc1	359.752	0.509809	0.0154919	0.109317
ENSMUSG00000015342.6	Xk	170.028	0.509752	0.0565178	0.269007
ENSMUSG00000022217.14	Emc9	99.4883	0.508927	0.0417274	0.220415
ENSMUSG00000026202.13	Tuba4a	885.085	0.508862	0.0133589	0.0983115
ENSMUSG00000060962.12	Dmkn	347.407	0.508723	0.0576914	0.272783
ENSMUSG00000070284.10	Gmppb	214.246	0.508215	0.00290146	0.029154
ENSMUSG00000035969.15	Rusc2	1236.09	0.508185	3.23e-06	8.7e-05
ENSMUSG00000006395.16	Hyi	258.474	0.50742	0.00380784	0.0364522
ENSMUSG00000057335.11	Cep170	790.256	0.506278	0.0345422	0.194374
ENSMUSG00000046179.17	E2f8	608.527	0.505986	0.0312265	0.181014
ENSMUSG00000019467.13	Arhgef25	484.569	0.505754	0.00153366	0.0174043
ENSMUSG00000032577.16	Mapkapk3	236.3	0.505291	0.0493163	0.246254
ENSMUSG00000021025.7	Nfkbia	1422.42	0.50493	0.00419955	0.0394286
ENSMUSG00000106847.1	NA	988.439	0.504193	0.000100196	0.00176232
ENSMUSG00000060147.15	Serpinb6a	770.607	0.502798	0.0014494	0.0166467
ENSMUSG00000035187.10	Nkx6-1	107.925	0.5023	0.108829	0.407782
ENSMUSG00000026946.9	Nmi	208.105	0.502159	0.0713361	0.312954
ENSMUSG00000075284.10	Wipf1	876.772	0.501876	0.000543324	0.0072971
ENSMUSG00000034768.4	Asb16	99.0796	0.501502	0.0217552	0.140872
ENSMUSG00000038910.6	Plcl2	112.622	0.50122	0.196598	0.558948
ENSMUSG00000054733.8	Msra	241.564	0.499016	0.00355409	0.0345444
ENSMUSG00000079737.3	3110001I22Rik	96.2504	0.498962	0.0179842	0.122017
ENSMUSG00000040282.13	BC052040	239.862	0.498348	0.0159618	0.111885
ENSMUSG00000001864.13	Aif1l	1438.92	0.497337	0.0154671	0.109214
ENSMUSG00000028031.6	Dkk2	865.298	0.4967	0.212726	0.580081
ENSMUSG00000029029.14	Wrap73	366.871	0.495687	0.0061189	0.0534169
ENSMUSG00000049536.5	Tceal1	152.304	0.495474	0.0341008	0.192576
ENSMUSG00000029560.12	Snx8	459.479	0.494649	0.0358361	0.199472
ENSMUSG00000050192.8	Eif5a2	121.156	0.494627	0.0263914	0.161445
ENSMUSG00000000731.15	Aire	188.377	0.494432	0.135746	0.462558
ENSMUSG00000071637.4	Cebpd	402.833	0.494349	0.094942	0.375172
ENSMUSG00000058099.15	Nfam1	1498.36	0.492725	0.0112406	0.0864674
ENSMUSG00000019970.15	Sgk1	522.504	0.492671	0.0601221	0.280907
ENSMUSG00000024421.16	Lama3	300.811	0.492449	0.0268702	0.163219
ENSMUSG00000039706.11	Ldb2	611.003	0.492278	0.000614227	0.00811197
ENSMUSG00000015656.16	Hspa8	478.471	0.490677	0.00278216	0.0281456
ENSMUSG00000028599.10	Tnfrsf1b	1037.85	0.490622	0.00419954	0.0394286
ENSMUSG00000028028.11	Alpk1	345.359	0.490147	0.0320635	0.18405
ENSMUSG00000060771.14	Tsga10	86.9094	0.490008	0.0384772	0.209576
ENSMUSG00000024121.13	Atp6v0c	318.138	0.489153	0.000721426	0.00926414
ENSMUSG00000022325.14	Pop1	215.779	0.489127	0.00807388	0.0664306
ENSMUSG00000037613.15	Tnfrsf23	59.9864	0.489068	0.19636	0.55873
ENSMUSG00000074813.12	NA	59.1592	0.488934	0.195253	0.557769
ENSMUSG00000027579.6	Srms	138.972	0.486766	0.0732058	0.317932
ENSMUSG00000041515.9	Irf8	806.025	0.486589	4.91e-05	0.000940819
ENSMUSG00000029725.10	Ppp1r35	276.635	0.486563	0.0371894	0.204612
ENSMUSG00000056144.13	Trim34a	68.2806	0.484962	0.0702743	0.310299
ENSMUSG00000025743.14	Sdc3	2863	0.484935	0.0119071	0.090457
ENSMUSG00000071180.4	Smim15	487.72	0.484587	0.00158296	0.0178045
ENSMUSG00000032000.17	Birc3	692.873	0.483727	0.000450725	0.00623857
ENSMUSG00000020326.7	Ccng1	491.466	0.483164	0.000299616	0.00443734
ENSMUSG00000035431.4	Sstr1	68.4626	0.483128	0.230935	0.604281
ENSMUSG00000037752.4	Xkr8	64.716	0.482864	0.0576737	0.272783
ENSMUSG00000056486.17	Chn1	53.6415	0.482805	0.175596	0.530355
ENSMUSG00000004768.14	Rab23	431.817	0.482763	0.00028207	0.00421163
ENSMUSG00000044231.2	Nhlrc1	72.6357	0.48146	0.0512605	0.252992
ENSMUSG00000030643.13	Rab30	97.7955	0.480761	0.0811778	0.339836
ENSMUSG00000029378.5	Areg	82.2979	0.480754	0.215451	0.583642
ENSMUSG00000021583.6	Erap1	657.383	0.480746	0.000174758	0.00282088
ENSMUSG00000033009.15	Ogfod1	587.311	0.4805	0.00222178	0.0236613
ENSMUSG00000045730.3	Adrb2	425.191	0.480311	0.0713646	0.312958
ENSMUSG00000031684.10	Slc10a7	643.231	0.479536	3.03e-05	0.000616708
ENSMUSG00000030798.13	Cd37	212.424	0.4787	0.0106883	0.0829664
ENSMUSG00000062937.7	Mtap	1324.67	0.477923	0.000306613	0.00451287
ENSMUSG00000033446.7	Lpar6	412.466	0.477028	0.000488719	0.00670087
ENSMUSG00000035860.8	Cdhr3	116.027	0.476783	0.22806	0.600222
ENSMUSG00000034686.7	Prr7	58.0265	0.476583	0.0724958	0.316003
ENSMUSG00000026875.14	Traf1	389.023	0.476122	0.0361511	0.200581
ENSMUSG00000040767.10	Snrnp25	156.737	0.475949	0.034981	0.196147
ENSMUSG00000037104.8	Socs5	706.16	0.47562	0.000129767	0.00218936
ENSMUSG00000031555.13	Adam9	1055.94	0.475364	2.34e-05	0.000493886
ENSMUSG00000028277.13	Ube2j1	1304.18	0.475115	2.77e-06	7.58e-05
ENSMUSG00000001473.6	Tubb6	769.726	0.474513	0.00560115	0.0496255
ENSMUSG00000038422.2	Hdhd3	165.674	0.474267	0.0275396	0.166119
ENSMUSG00000098132.1	Rassf10	703.22	0.473975	2.98e-05	0.000608229
ENSMUSG00000097971.3	NA	1501.89	0.473631	0.00501419	0.0454345
ENSMUSG00000021469.9	Msx2	145.048	0.473009	0.0473618	0.239273
ENSMUSG00000030089.15	Slc41a3	68.8475	0.472935	0.0899024	0.362026
ENSMUSG00000027639.16	Samhd1	1810.84	0.472487	0.00108247	0.0130466
ENSMUSG00000025226.11	Fbxl15	79.9227	0.471381	0.0897518	0.361772
ENSMUSG00000028792.14	Ak2	853.959	0.471277	2.46e-05	0.000512479
ENSMUSG00000026383.14	Epb41l5	1133.6	0.470702	1.65e-05	0.000366013
ENSMUSG00000003032.8	Klf4	1781.57	0.46977	0.00234151	0.0245366
ENSMUSG00000021175.15	Cdca7l	387.995	0.469229	0.051243	0.252972
ENSMUSG00000027329.9	Spef1	379.847	0.468911	0.0143799	0.1037
ENSMUSG00000024013.14	Fgd2	538.259	0.468683	0.00362097	0.0351469
ENSMUSG00000021614.16	Vcan	307.963	0.468622	0.0873628	0.355941
ENSMUSG00000028266.17	Lmo4	966.427	0.468232	0.00846117	0.0690204
ENSMUSG00000014633.15	Cmc2	124.941	0.468185	0.0306145	0.178489
ENSMUSG00000038268.4	Ovca2	94.2127	0.467985	0.0583704	0.27509
ENSMUSG00000005057.13	Sh2b2	173.915	0.46787	0.0408131	0.217809
ENSMUSG00000048100.13	Taf13	213.468	0.467706	0.0201774	0.132733
ENSMUSG00000030157.5	Clec2d	144.296	0.467511	0.0325991	0.186528
ENSMUSG00000001510.8	Dlx3	377.25	0.467429	0.00627046	0.0544154
ENSMUSG00000024772.9	Ehd1	886.059	0.46722	0.00185885	0.0202892
ENSMUSG00000027274.16	Mkks	377.767	0.467174	0.00245905	0.0255309
ENSMUSG00000019789.8	Hey2	1160.3	0.466777	0.0150086	0.106857
ENSMUSG00000073802.4	Cdkn2b	483.954	0.466486	0.00414304	0.0390135
ENSMUSG00000035356.16	Nfkbiz	2439.22	0.466019	0.00607776	0.0531309
ENSMUSG00000003812.13	Dnase2a	496.585	0.465488	0.00792643	0.0656145
ENSMUSG00000027499.12	Pkia	764.815	0.465087	0.0295159	0.173799
ENSMUSG00000024534.15	Sncaip	1004.52	0.464814	0.0930994	0.370237
ENSMUSG00000026123.11	Plekhb2	1128.62	0.464536	1.1e-05	0.000257052
ENSMUSG00000046822.12	Slc39a3	648.268	0.463762	0.00751449	0.0629161
ENSMUSG00000043061.9	Tmem18	356.803	0.463741	0.00455599	0.0420083
ENSMUSG00000014303.13	Glis2	1044.93	0.463346	0.000251639	0.0038373
ENSMUSG00000020829.9	Slc46a1	259.113	0.463101	0.0261529	0.160761
ENSMUSG00000022014.14	Epsti1	402.045	0.463016	0.0649812	0.29578
ENSMUSG00000045294.11	Insig1	659.64	0.462977	0.00306131	0.0303279
ENSMUSG00000035638.14	Muc20	73.4941	0.462287	0.0673985	0.302514
ENSMUSG00000024697.3	Gna14	948.754	0.461844	0.0187313	0.125564
ENSMUSG00000029119.9	Man2b2	484.538	0.46166	0.00241885	0.0251822
ENSMUSG00000097815.1	NA	106.745	0.461343	0.0651052	0.295888
ENSMUSG00000030725.3	Lipt2	299.593	0.461249	0.00636292	0.0551424
ENSMUSG00000040488.16	Ltbp4	411.438	0.461217	0.1898	0.550751
ENSMUSG00000020723.3	Cacng4	77.2102	0.460511	0.0729666	0.317258
ENSMUSG00000047767.16	Atg16l2	384.846	0.459209	0.00260431	0.0267184
ENSMUSG00000060579.12	Fhit	147.572	0.459031	0.030143	0.176617
ENSMUSG00000039518.7	Cdsn	112.949	0.459015	0.168536	0.518077
ENSMUSG00000002068.16	Ccne1	84.0105	0.45859	0.0400027	0.214932
ENSMUSG00000032344.17	Mb21d1	101.256	0.458335	0.071675	0.31366
ENSMUSG00000043439.5	E130012A19Rik	297.406	0.458077	0.0157891	0.110961
ENSMUSG00000068744.12	Psrc1	187.701	0.457365	0.00599138	0.0524908
ENSMUSG00000007646.13	Rad51c	105.15	0.45642	0.110502	0.411615
ENSMUSG00000031790.7	Mmp15	1988.48	0.455463	0.0050183	0.0454345
ENSMUSG00000078816.9	Prkcg	56.9237	0.455364	0.133135	0.457283
ENSMUSG00000048240.14	Gng7	275.91	0.453036	0.0434725	0.226581
ENSMUSG00000044674.6	Fzd1	1113.83	0.452544	0.000644239	0.00843226
ENSMUSG00000023277.11	Twf2	423.212	0.452175	0.0183053	0.123638
ENSMUSG00000035235.12	Trim13	213.217	0.451637	0.130089	0.450542
ENSMUSG00000001467.5	Cyp51	983.445	0.451433	0.00127879	0.0150091
ENSMUSG00000021773.10	Comtd1	63.0892	0.450939	0.0942919	0.373459
ENSMUSG00000050357.8	Rltpr	57.6664	0.450453	0.13478	0.46031
ENSMUSG00000026102.9	Inpp1	430.601	0.450402	0.0926533	0.368981
ENSMUSG00000045679.13	Pqlc3	116.78	0.450187	0.0711981	0.312565
ENSMUSG00000023067.13	Cdkn1a	361.831	0.450169	0.0562983	0.268395
ENSMUSG00000034422.14	Parp14	1039.16	0.450162	0.0128241	0.0955579
ENSMUSG00000063060.5	Sox7	85.3017	0.449542	0.187539	0.5474
ENSMUSG00000072812.4	Ahnak2	101.711	0.449103	0.160531	0.504468
ENSMUSG00000046567.9	4930430F08Rik	156.125	0.449074	0.0110456	0.0852966
ENSMUSG00000043998.10	Mgat2	841.157	0.448576	0.000256646	0.00389803
ENSMUSG00000001802.16	Lrp3	161.263	0.448263	0.124151	0.43974
ENSMUSG00000032911.5	Cspg4	58.575	0.447274	0.126533	0.444655
ENSMUSG00000016995.17	Matn4	220.952	0.447273	0.0967021	0.379451
ENSMUSG00000090665.1	Gad1-ps	73.4952	0.44688	0.12546	0.442646
ENSMUSG00000058952.12	Cfi	492.504	0.446156	0.107296	0.404106
ENSMUSG00000078349.2	AW011738	508.025	0.445784	0.00923624	0.0740104
ENSMUSG00000026932.14	Nacc2	431.893	0.445539	0.042853	0.224182
ENSMUSG00000070802.5	Pnmal2	284.592	0.445202	0.127721	0.446335
ENSMUSG00000045817.8	Zfp36l2	1172.53	0.444924	0.000147597	0.00244172
ENSMUSG00000050052.11	Tdrp	544.219	0.444607	0.0215046	0.139773
ENSMUSG00000021913.7	Ogdhl	147.995	0.44379	0.215719	0.584141
ENSMUSG00000023999.14	Kif6	435.161	0.443784	0.0190162	0.126958
ENSMUSG00000024339.12	Tap2	1071.75	0.443288	0.00591567	0.0519046
ENSMUSG00000022416.15	Cacna1i	61.5378	0.442984	0.270839	0.650471
ENSMUSG00000028214.13	Gem	844.703	0.442981	0.0779904	0.330923
ENSMUSG00000041180.13	Hectd2	90.025	0.442051	0.122505	0.435895
ENSMUSG00000062127.11	Cttnbp2nl	881.795	0.441441	0.00800336	0.0660447
ENSMUSG00000073405.6	NA	54.3099	0.441191	0.124803	0.441554
ENSMUSG00000022377.16	Asap1	264.458	0.441053	0.0842645	0.348012
ENSMUSG00000031700.11	Gpt2	1567.08	0.440616	0.0157358	0.110729
ENSMUSG00000000308.14	Ckmt1	370.039	0.440272	0.0434415	0.226565
ENSMUSG00000063406.11	Tmed5	825.331	0.439762	0.00403442	0.0382175
ENSMUSG00000039405.6	Prss23	415.766	0.439246	0.0236306	0.149457
ENSMUSG00000021190.14	Lgmn	1625.64	0.439176	0.000542843	0.0072958
ENSMUSG00000061048.7	Cdh3	875.997	0.438821	0.0236502	0.149481
ENSMUSG00000029072.3	Tas1r3	60.4392	0.438282	0.157764	0.500301
ENSMUSG00000024525.6	Impa2	137.863	0.438276	0.0537106	0.26075
ENSMUSG00000021948.15	Prkcd	1319.05	0.438263	0.00156722	0.0177008
ENSMUSG00000044641.7	Pard6b	1071.79	0.438254	0.00255814	0.026387
ENSMUSG00000027030.15	Stk39	1455.67	0.437627	0.00590575	0.0518415
ENSMUSG00000049764.7	Zfp280b	1056.22	0.437224	0.00580726	0.0511658
ENSMUSG00000032519.11	Slc25a38	332.573	0.436919	0.00499096	0.0453379
ENSMUSG00000031827.12	Cotl1	903.727	0.43678	0.000555746	0.0074377
ENSMUSG00000032482.9	Cspg5	2059.1	0.436088	0.0349159	0.196129
ENSMUSG00000078700.10	NA	98.335	0.4356	0.117736	0.426139
ENSMUSG00000027456.8	Sdcbp2	217.012	0.435011	0.114864	0.419683
ENSMUSG00000044916.10	1700029I15Rik	66.0581	0.434352	0.115222	0.420315
ENSMUSG00000026051.8	1500015O10Rik	94.0889	0.433528	0.24762	0.624663
ENSMUSG00000020253.14	Ppm1m	489.713	0.43313	0.045379	0.232904
ENSMUSG00000001946.13	Esam	150.434	0.432898	0.126581	0.444706
ENSMUSG00000035199.6	Arl6ip5	626.214	0.432648	0.0076449	0.0637835
ENSMUSG00000029581.14	Fscn1	604.651	0.432442	0.0105319	0.0820709
ENSMUSG00000037211.12	Spry1	911.342	0.432163	0.000563134	0.00751555
ENSMUSG00000022048.8	Dpysl2	203.493	0.431958	0.0564762	0.268901
ENSMUSG00000049892.7	Rasd1	214.525	0.43164	0.0411579	0.219037
ENSMUSG00000049881.13	NA	223.424	0.431321	0.0662358	0.29891
ENSMUSG00000038347.14	Tcte2	112.922	0.430723	0.0493412	0.246266
ENSMUSG00000030966.12	Trim21	355.337	0.430638	0.000820916	0.0103394
ENSMUSG00000107881.1	NA	714.433	0.430497	0.000427385	0.00598056
ENSMUSG00000026064.15	Ptp4a1	515.356	0.430413	0.0080699	0.0664266
ENSMUSG00000034110.8	Kctd7	127.382	0.429794	0.0269241	0.16339
ENSMUSG00000059326.6	Csf2ra	846.038	0.429712	0.000701698	0.00904131
ENSMUSG00000028385.14	Snx30	242.023	0.429697	0.0268093	0.162901
ENSMUSG00000018923.13	Med11	265.846	0.428384	0.0133292	0.0982449
ENSMUSG00000010047.12	Hyal2	383.833	0.428353	0.0341562	0.192772
ENSMUSG00000030954.9	Gp2	1291.74	0.428107	0.104317	0.397209
ENSMUSG00000022575.4	Gsdmd	743.267	0.427683	0.0319042	0.183644
ENSMUSG00000032263.14	Bckdhb	240.627	0.42738	0.0407826	0.21777
ENSMUSG00000027293.13	Ehd4	1080.33	0.427352	0.0157387	0.110729
ENSMUSG00000025931.15	Paqr8	1714.7	0.427296	0.0339735	0.192025
ENSMUSG00000025453.16	Nnt	569.269	0.427268	0.0184783	0.124218
ENSMUSG00000023827.8	Agpat4	227.5	0.42706	0.112502	0.415169
ENSMUSG00000063975.13	Slco1a5	68.9773	0.426614	0.158582	0.501742
ENSMUSG00000020973.7	Dnaaf2	266.489	0.426202	0.0118552	0.0901529
ENSMUSG00000019779.14	Frk	670.327	0.425489	0.0226377	0.145252
ENSMUSG00000038884.14	A230050P20Rik	597.746	0.425187	0.00367897	0.0355403
ENSMUSG00000053835.17	H2-T24	85.1296	0.424968	0.150594	0.488155
ENSMUSG00000037325.10	Bbs7	120.383	0.4248	0.100555	0.387757
ENSMUSG00000000983.13	Wfdc18	352.324	0.424019	0.0343314	0.193474
ENSMUSG00000020593.14	Lpin1	1197.33	0.423177	0.0579686	0.273747
ENSMUSG00000026162.7	Nhej1	57.0212	0.423126	0.161128	0.505677
ENSMUSG00000040183.13	Ankrd6	929.371	0.422906	0.0152075	0.107869
ENSMUSG00000021638.12	Ocln	1183.85	0.422608	0.00122968	0.0145354
ENSMUSG00000022125.6	Cln5	567.767	0.421531	0.00165584	0.0184224
ENSMUSG00000056234.14	Ncoa4	109.274	0.421443	0.0524503	0.256863
ENSMUSG00000035165.13	Kcne3	323.329	0.421359	0.276038	0.656153
ENSMUSG00000018569.12	Cldn7	825.945	0.420339	0.00278682	0.0281508
ENSMUSG00000016256.10	Ctsz	1164.7	0.420313	0.00309287	0.0305768
ENSMUSG00000029759.9	Pon3	557.132	0.420282	0.00108954	0.0131235
ENSMUSG00000031591.14	Asah1	1085.43	0.419869	0.000118547	0.00204294
ENSMUSG00000006442.10	Srm	310.286	0.419553	0.0536751	0.260717
ENSMUSG00000022221.13	Ripk3	229.588	0.41946	0.066034	0.298219
ENSMUSG00000040710.10	St8sia4	126.638	0.419419	0.197409	0.560118
ENSMUSG00000028378.6	Ptgr1	516.87	0.419167	0.0044923	0.0415417
ENSMUSG00000035232.8	Pdk3	300.965	0.418996	0.0462	0.235546
ENSMUSG00000097296.1	NA	221.06	0.418807	0.158037	0.50085
ENSMUSG00000026885.13	Ttll11	138.953	0.418767	0.0697433	0.308743
ENSMUSG00000047757.16	Fancb	126.758	0.418364	0.0428551	0.224182
ENSMUSG00000046667.14	Rbm12b1	147.833	0.41756	0.0408157	0.217809
ENSMUSG00000049086.8	Bmyc	91.4025	0.417177	0.0558566	0.267289
ENSMUSG00000026158.11	Ogfrl1	70.9837	0.417024	0.235925	0.609957
ENSMUSG00000021900.10	Btd	427.366	0.417002	0.0640718	0.292832
ENSMUSG00000028655.11	Mfsd2a	2164.12	0.416817	0.000306567	0.00451287
ENSMUSG00000063445.14	Nmral1	336.303	0.416542	0.0206889	0.135722
ENSMUSG00000079491.9	H2-T10	241.982	0.416483	0.215504	0.583642
ENSMUSG00000005413.7	Hmox1	674.382	0.41628	0.120791	0.432092
ENSMUSG00000030428.16	Ttyh1	1871.13	0.41425	0.00420231	0.039435
ENSMUSG00000002257.7	Def6	101.364	0.414119	0.193315	0.555233
ENSMUSG00000040007.8	Bahd1	556.381	0.414074	0.000906642	0.0112205
ENSMUSG00000003604.14	Aven	167.793	0.413771	0.0593872	0.278534
ENSMUSG00000022814.6	Umps	530.436	0.41361	0.0128401	0.0956022
ENSMUSG00000049422.6	Chchd10	275.518	0.413456	0.0881583	0.358278
ENSMUSG00000047547.14	Cltb	378.306	0.412711	0.0518265	0.254663
ENSMUSG00000030499.9	Kctd15	84.7919	0.411928	0.287134	0.667944
ENSMUSG00000040010.10	Slc7a5	1453.74	0.411526	0.070875	0.311775
ENSMUSG00000028015.3	Ctso	441.921	0.411497	0.0159836	0.111952
ENSMUSG00000039234.11	Sec24d	941.816	0.4113	0.151381	0.489341
ENSMUSG00000051242.1	Pcdhb9	211.729	0.410881	0.025575	0.158068
ENSMUSG00000000278.10	Scpep1	469.931	0.409976	0.0162392	0.113163
ENSMUSG00000035778.17	Ggta1	906.615	0.409829	0.0986504	0.384186
ENSMUSG00000035863.13	Palm	244.37	0.409662	0.178013	0.533927
ENSMUSG00000028672.13	Hmgcl	383.997	0.409257	0.0339683	0.192025
ENSMUSG00000038776.13	Ephx1	508.09	0.409085	0.0273339	0.165245
ENSMUSG00000026113.17	Inpp4a	1255.46	0.408978	0.00861057	0.0699691
ENSMUSG00000045038.14	Prkce	348.389	0.408644	0.100144	0.387389
ENSMUSG00000023915.4	Tnfrsf21	382.231	0.408148	0.0632452	0.290887
ENSMUSG00000023191.9	P3h3	312.467	0.407345	0.0314193	0.181579
ENSMUSG00000028899.11	Taf12	381.113	0.407333	0.0229761	0.146829
ENSMUSG00000027171.10	Prrg4	62.8882	0.406947	0.2923	0.673318
ENSMUSG00000090386.9	NA	163.014	0.40673	0.0524337	0.256863
ENSMUSG00000005320.9	Fgfr4	213.442	0.406626	0.188531	0.548793
ENSMUSG00000070056.5	Mfhas1	629.714	0.40647	0.0168886	0.116283
ENSMUSG00000021253.6	Tgfb3	1306.24	0.405817	0.0326368	0.186632
ENSMUSG00000032026.6	Rexo2	380.606	0.405629	0.0131915	0.0975319
ENSMUSG00000028221.3	Tmem55a	382.651	0.405629	0.00829424	0.0679499
ENSMUSG00000028772.19	Zcchc17	331.119	0.405295	0.0069648	0.0594115
ENSMUSG00000049723.14	Mmp12	419.995	0.405037	0.130242	0.450846
ENSMUSG00000022179.4	4931414P19Rik	253.802	0.404716	0.0617374	0.2858
ENSMUSG00000091971.3	Hspa1a	236.26	0.404193	0.174873	0.52961
ENSMUSG00000054408.9	Spcs3	962.495	0.403498	0.000302452	0.00446546
ENSMUSG00000036875.15	Dna2	274.012	0.403349	0.0483228	0.242346
ENSMUSG00000031458.7	Coprs	159.518	0.403324	0.0471419	0.238553
ENSMUSG00000005470.8	Asf1b	232.161	0.403298	0.020995	0.13721
ENSMUSG00000019528.18	Gyg	344.246	0.40278	0.00363383	0.0352295
ENSMUSG00000040592.11	Cd79b	133.593	0.402556	0.275253	0.655474
ENSMUSG00000085178.1	NA	87.4009	0.402122	0.0894553	0.361295
ENSMUSG00000024299.16	Adamts10	720.892	0.402028	0.0857901	0.351945
ENSMUSG00000066595.9	Mfsd7b	342.852	0.401711	0.0041668	0.0391984
ENSMUSG00000044461.5	Shisa2	231.459	0.401619	0.27308	0.652887
ENSMUSG00000031639.11	Tlr3	603.434	0.401617	0.0367389	0.202749
ENSMUSG00000033581.16	Igf2bp2	521.982	0.401574	0.0383824	0.20924
ENSMUSG00000005873.5	Reep5	1540.17	0.401497	0.00400828	0.0380267
ENSMUSG00000025933.15	Tmem14a	91.6636	0.401489	0.116049	0.42204
ENSMUSG00000052593.15	Adam17	1374.7	0.401378	0.000808769	0.0102202
ENSMUSG00000070044.15	Fam149a	317.361	0.401101	0.050859	0.251794
ENSMUSG00000018547.8	Pip4k2b	611.367	0.401056	0.0361507	0.200581
ENSMUSG00000010048.10	Ifrd2	381.634	0.400485	0.012545	0.0940308
ENSMUSG00000071176.10	Arhgef10	535.824	0.400428	0.0163544	0.113799
ENSMUSG00000060131.11	Atp8b4	56.013	0.400387	0.280617	0.661271
ENSMUSG00000015133.16	Lrrk1	1745.73	0.399977	0.0656083	0.297168
ENSMUSG00000057143.14	Trim12c	236.516	0.39936	0.0800657	0.336787
ENSMUSG00000060512.7	0610040J01Rik	1032.95	0.398897	0.00151987	0.0172788
ENSMUSG00000033313.11	Fbxl8	88.2133	0.398488	0.121927	0.434437
ENSMUSG00000029380.11	Cxcl1	720.904	0.39845	0.0767007	0.327505
ENSMUSG00000083718.2	NA	126.421	0.397939	0.0746947	0.321828
ENSMUSG00000035239.6	Neu3	53.1438	0.397644	0.123643	0.438348
ENSMUSG00000069833.12	Ahnak	2750.23	0.3974	0.181322	0.539559
ENSMUSG00000018821.3	Avpi1	102.059	0.396669	0.130895	0.452015
ENSMUSG00000037022.2	Mmaa	177.913	0.396523	0.0540742	0.261971
ENSMUSG00000064254.6	Ethe1	116.688	0.396302	0.109019	0.408018
ENSMUSG00000002020.15	Ltbp2	99.4153	0.396043	0.106548	0.402087
ENSMUSG00000035107.13	Dcbld2	488.242	0.395912	0.0964184	0.378728
ENSMUSG00000041119.11	Pde9a	225.278	0.395783	0.120288	0.431182
ENSMUSG00000069910.2	Spdl1	216.202	0.395766	0.014715	0.105318
ENSMUSG00000030104.9	Edem1	1259.33	0.395725	0.000196853	0.00311933
ENSMUSG00000037887.11	Dusp8	822.499	0.395551	0.0413201	0.219471
ENSMUSG00000021458.16	2010111I01Rik	914.714	0.395403	0.00040671	0.005759
ENSMUSG00000032786.14	Alas1	875.912	0.39511	0.00143597	0.0165671
ENSMUSG00000045282.7	Tmem86b	140.403	0.394124	0.0570561	0.270736
ENSMUSG00000066842.18	Hmcn1	1127.21	0.394075	0.322998	0.70474
ENSMUSG00000036840.4	Siah1a	285.783	0.394022	0.0212493	0.138397
ENSMUSG00000004085.14	Zak	208.575	0.39348	0.172353	0.525313
ENSMUSG00000096727.2	Psmb9	568.901	0.393266	0.0737815	0.319058
ENSMUSG00000043099.4	Hic1	63.446	0.392984	0.301969	0.684628
ENSMUSG00000075271.4	Ttc30a1	77.7989	0.392982	0.143105	0.475876
ENSMUSG00000051319.6	1500011K16Rik	113.711	0.392869	0.105059	0.398511
ENSMUSG00000022665.14	Ccdc80	1098.76	0.392634	0.0925917	0.368943
ENSMUSG00000031167.16	Rbm3	449.531	0.392229	0.0123728	0.0929966
ENSMUSG00000041571.9	Sepw1	405.604	0.391528	0.0526132	0.257267
ENSMUSG00000020044.13	Timp3	1428.35	0.391022	0.0333725	0.189586
ENSMUSG00000032491.14	Nradd	67.7123	0.390292	0.0975932	0.381665
ENSMUSG00000025920.19	Stau2	866.067	0.390259	0.00911508	0.0732246
ENSMUSG00000002983.16	Relb	766.504	0.390094	0.0117816	0.0896865
ENSMUSG00000023903.7	Mmp25	54.4813	0.390068	0.227472	0.599505
ENSMUSG00000062794.8	Zfp599	55.9681	0.388844	0.211191	0.578215
ENSMUSG00000086784.1	Isoc2a	224.802	0.388521	0.0737062	0.319014
ENSMUSG00000035595.6	1600002K03Rik	99.2525	0.388274	0.158956	0.502324
ENSMUSG00000039246.8	Lyplal1	216.079	0.388102	0.0697023	0.308705
ENSMUSG00000038080.16	Kdm1b	1747.67	0.387593	0.00374931	0.0360551
ENSMUSG00000026887.9	Mrrf	248.117	0.387343	0.0237179	0.14971
ENSMUSG00000024921.16	Smarca2	488.381	0.387178	0.0970192	0.380069
ENSMUSG00000010057.8	Nprl2	386.877	0.387162	0.0162595	0.113221
ENSMUSG00000032501.8	Trib1	2023.81	0.38693	0.00452162	0.0417384
ENSMUSG00000069516.7	Lyz2	1337.8	0.386619	0.00128531	0.0150435
ENSMUSG00000041607.16	Mbp	756.083	0.386483	0.00547644	0.048702
ENSMUSG00000045464.5	NA	106.56	0.385773	0.0688196	0.306364
ENSMUSG00000033318.6	Gstt2	368.762	0.385549	0.0211154	0.137666
ENSMUSG00000043419.10	Chd3os	93.1249	0.385293	0.0850559	0.350216
ENSMUSG00000035104.14	Eva1a	161.94	0.384955	0.124718	0.44142
ENSMUSG00000002910.10	Arrdc2	651.441	0.384724	0.0159044	0.111591
ENSMUSG00000066191.11	Anks6	848.298	0.38472	0.0462031	0.235546
ENSMUSG00000026278.14	Bok	855.354	0.38449	0.00165628	0.0184224
ENSMUSG00000033985.17	Tesk2	553.979	0.384304	0.0401133	0.215124
ENSMUSG00000038055.12	Dexi	424.8	0.384261	0.0195231	0.129278
ENSMUSG00000002578.15	Ikzf4	75.7125	0.38396	0.143145	0.475924
ENSMUSG00000027459.16	Fam110a	509.412	0.383871	0.0421071	0.221487
ENSMUSG00000025921.7	Rdh10	1421.63	0.383575	0.000281135	0.00420288
ENSMUSG00000068329.12	Htra2	309.926	0.383408	0.00999142	0.0787031
ENSMUSG00000024399.5	Ltb	90.2538	0.383361	0.14041	0.47078
ENSMUSG00000039158.11	Akna	333.594	0.383351	0.111231	0.412882
ENSMUSG00000020955.8	Ap4s1	142.728	0.382891	0.0371588	0.204573
ENSMUSG00000026726.10	Cubn	216.144	0.382632	0.228693	0.60139
ENSMUSG00000009376.15	Met	1667.79	0.382595	0.0271077	0.164268
ENSMUSG00000038990.14	Cables2	698.476	0.382358	0.0208052	0.136347
ENSMUSG00000037605.16	Adgrl3	305.509	0.381594	0.276934	0.657394
ENSMUSG00000027763.13	Mbnl1	1456.91	0.381559	0.004945	0.0449418
ENSMUSG00000026646.16	Suv39h2	118.286	0.38101	0.0907287	0.363967
ENSMUSG00000079003.1	Samd1	452.486	0.38082	0.0226614	0.145355
ENSMUSG00000002603.15	Tgfb1	366.526	0.380803	0.186539	0.546073
ENSMUSG00000032332.17	Col12a1	59.0839	0.380686	0.300721	0.683673
ENSMUSG00000044788.10	Fads6	406.184	0.3805	0.0601856	0.281009
ENSMUSG00000036225.14	Kctd1	187.625	0.380341	0.0403988	0.216328
ENSMUSG00000043003.13	Rasef	1357.65	0.38032	0.000621097	0.00818
ENSMUSG00000028517.8	Plpp3	1135.71	0.380211	0.00104319	0.0126614
ENSMUSG00000033342.13	Plppr5	861.642	0.380178	0.111689	0.413721
ENSMUSG00000066026.14	Dhrs3	577.28	0.380177	0.0458469	0.23447
ENSMUSG00000082389.2	NA	63.0171	0.379964	0.111811	0.413822
ENSMUSG00000017978.18	Cadps2	482.186	0.379923	0.180627	0.538162
ENSMUSG00000002058.13	Unc119	473.369	0.379382	0.00770473	0.0641681
ENSMUSG00000035367.8	Rmi1	104.291	0.378877	0.0626632	0.288961
ENSMUSG00000039981.5	Zc3h12d	50.0917	0.378296	0.264965	0.644746
ENSMUSG00000039328.9	Rnf122	616.074	0.377919	0.0285653	0.170309
ENSMUSG00000015337.5	Endog	92.255	0.377873	0.154224	0.494199
ENSMUSG00000027878.11	Notch2	1746.7	0.377661	0.0740126	0.319613
ENSMUSG00000035067.9	Xkr6	372.298	0.37631	0.0285955	0.170382
ENSMUSG00000074476.5	Spc24	173.331	0.376286	0.0291432	0.172351
ENSMUSG00000046269.16	Usp27x	96.7392	0.376144	0.130469	0.451036
ENSMUSG00000014905.3	Dnajb9	725.757	0.375715	0.0124146	0.0932737
ENSMUSG00000022947.7	Cbr3	281.45	0.375653	0.0776286	0.330134
ENSMUSG00000022540.16	Rogdi	947.156	0.375392	0.055809	0.267128
ENSMUSG00000017747.13	Ghdc	279.028	0.375284	0.0260713	0.160467
ENSMUSG00000035314.8	Gdpd5	425.176	0.375268	0.0426736	0.223553
ENSMUSG00000059895.12	Ptp4a3	225.052	0.375022	0.0953607	0.376126
ENSMUSG00000032044.4	Rpusd4	316.858	0.374821	0.0216262	0.140323
ENSMUSG00000001248.14	Gramd1a	1457.58	0.374476	0.0562107	0.268124
ENSMUSG00000029207.16	Apbb2	626.661	0.37436	0.0614427	0.28499
ENSMUSG00000027784.10	Ppm1l	1374.85	0.374216	0.133928	0.45866
ENSMUSG00000042426.5	Dhx29	628.666	0.37418	0.0342498	0.193191
ENSMUSG00000052102.14	Gnpda1	166.509	0.374173	0.0451395	0.232082
ENSMUSG00000021895.9	Arhgef3	835.654	0.374069	0.00950316	0.0756082
ENSMUSG00000023571.4	Fam132a	65.6164	0.37305	0.345624	0.725715
ENSMUSG00000034799.16	Unc13a	84.265	0.373042	0.120912	0.432208
ENSMUSG00000034127.14	Tspan8	698.042	0.372808	0.0851535	0.350542
ENSMUSG00000056687.9	NA	60.4412	0.372466	0.163288	0.509778
ENSMUSG00000024403.16	Atp6v1g2	198.074	0.372456	0.049038	0.245203
ENSMUSG00000001999.15	Blvra	311.085	0.372188	0.0557448	0.266955
ENSMUSG00000033805.12	Ephx4	115.602	0.372142	0.223172	0.59368
ENSMUSG00000018659.12	Pnpo	331.558	0.372116	0.0265401	0.161984
ENSMUSG00000038323.3	1700066M21Rik	149.59	0.372067	0.0727176	0.316607
ENSMUSG00000013921.14	Clip3	53.9214	0.371923	0.324512	0.706694
ENSMUSG00000075012.4	Fjx1	203.852	0.371776	0.0711675	0.312503
ENSMUSG00000037337.10	Map4k1	151.955	0.371158	0.114229	0.418701
ENSMUSG00000030930.13	Chst15	284.614	0.371141	0.0239141	0.150449
ENSMUSG00000028980.14	H6pd	684.883	0.370618	0.0512978	0.253105
ENSMUSG00000027010.16	Slc25a12	521.581	0.370463	0.0769535	0.328217
ENSMUSG00000032846.9	Zswim6	545.124	0.37044	0.0514251	0.253345
ENSMUSG00000025870.10	Arl10	213.524	0.370429	0.045087	0.232039
ENSMUSG00000090610.2	NA	58.8147	0.370243	0.183296	0.541518
ENSMUSG00000020441.6	2310033P09Rik	231.421	0.370147	0.0160997	0.112438
ENSMUSG00000049047.11	Armcx3	103.661	0.370101	0.0882396	0.358286
ENSMUSG00000032717.14	Mdfi	294.994	0.369965	0.0836848	0.346218
ENSMUSG00000005615.14	Pcyt1a	641.055	0.36972	0.0100824	0.0792111
ENSMUSG00000048481.15	Mypop	140.079	0.368726	0.14561	0.480676
ENSMUSG00000041798.15	Gck	103.126	0.368606	0.261533	0.641149
ENSMUSG00000041263.14	Rusc1	88.1554	0.367953	0.0960523	0.378062
ENSMUSG00000037979.13	Ccdc92	273.377	0.367615	0.0630413	0.290423
ENSMUSG00000070871.10	Ccnyl1	118.131	0.367562	0.0736422	0.319014
ENSMUSG00000073418.4	C4b	1882.81	0.36748	0.040734	0.217572
ENSMUSG00000036155.13	Mgat5	1574.28	0.367437	0.0774986	0.329898
ENSMUSG00000025869.11	Nop16	441.701	0.367292	0.0247126	0.153996
ENSMUSG00000034708.11	Grn	2090.87	0.367201	0.000275411	0.00413355
ENSMUSG00000039084.8	Chad	485.456	0.366579	0.0583976	0.27509
ENSMUSG00000049502.16	Dtx3l	928.696	0.366566	0.0238909	0.150402
ENSMUSG00000042784.9	Muc1	65.3259	0.366427	0.257638	0.637384
ENSMUSG00000051346.8	Spryd4	172.789	0.366057	0.0428549	0.224182
ENSMUSG00000081359.1	NA	54.3016	0.366001	0.192516	0.554277
ENSMUSG00000040263.16	Klhdc4	412.502	0.365787	0.00579375	0.0510703
ENSMUSG00000029344.14	Tpst2	564.623	0.365668	0.0416589	0.220327
ENSMUSG00000052534.15	Pbx1	1691.81	0.365011	0.0148818	0.106133
ENSMUSG00000044715.6	Gskip	312.959	0.364798	0.016616	0.115114
ENSMUSG00000048489.12	8430408G22Rik	91.1946	0.364633	0.352833	0.730894
ENSMUSG00000009090.17	Ap1b1	1558.96	0.364627	0.00785464	0.0651336
ENSMUSG00000064326.12	Siva1	102.25	0.363943	0.188215	0.548365
ENSMUSG00000065954.10	Tacc1	467.721	0.363863	0.0726088	0.31635
ENSMUSG00000090761.1	NA	100.362	0.363573	0.0977505	0.381911
ENSMUSG00000000861.15	Bcl11a	433.71	0.363529	0.256602	0.636353
ENSMUSG00000043895.5	S1pr2	613.132	0.363411	0.00473857	0.0434601
ENSMUSG00000028565.18	Nfia	2007.46	0.363317	0.0443102	0.229336
ENSMUSG00000084910.1	NA	192.04	0.36311	0.0394452	0.213032
ENSMUSG00000042275.8	Pelo	201.827	0.362696	0.0541353	0.262016
ENSMUSG00000057751.14	Megf6	1809.68	0.362164	0.0256517	0.158396
ENSMUSG00000050240.14	Hic2	107.776	0.362133	0.132008	0.454706
ENSMUSG00000029416.17	Slc15a4	497.542	0.36177	0.033887	0.191707
ENSMUSG00000047643.4	NA	129.23	0.361653	0.190957	0.55238
ENSMUSG00000048261.6	NA	76.1869	0.361365	0.118703	0.428172
ENSMUSG00000021477.8	Ctsl	1029.06	0.361147	0.0145152	0.10428
ENSMUSG00000063605.5	Ccdc102a	106.734	0.360906	0.270413	0.650106
ENSMUSG00000005774.12	Rfx5	609.839	0.360764	0.0674606	0.302566
ENSMUSG00000031887.13	Tradd	338.241	0.360742	0.0355848	0.19848
ENSMUSG00000002897.5	Il17ra	409.043	0.360608	0.018917	0.126526
ENSMUSG00000029551.13	Psmg3	142.813	0.360456	0.115027	0.419925
ENSMUSG00000010911.12	Apip	273.013	0.359856	0.0550865	0.265204
ENSMUSG00000033502.14	Cdc14a	1239.85	0.359627	0.0288506	0.171236
ENSMUSG00000074170.5	Plekhf1	58.4715	0.359479	0.215919	0.584397
ENSMUSG00000056917.12	Sipa1	651.876	0.35937	0.0168005	0.115844
ENSMUSG00000020707.6	Rnf135	147.128	0.359216	0.103804	0.395891
ENSMUSG00000051367.8	Six1	1209.37	0.358849	0.0253867	0.157066
ENSMUSG00000073910.10	Mob3b	1404.57	0.358576	0.0128569	0.0956457
ENSMUSG00000017057.9	Il13ra1	515.656	0.358573	0.0117796	0.0896865
ENSMUSG00000067212.8	H2-T23	721.992	0.358146	0.0220609	0.142416
ENSMUSG00000026456.18	Cyb5r1	520.822	0.358075	0.0268898	0.163286
ENSMUSG00000047180.8	Neurl3	931.017	0.35803	0.0936535	0.371781
ENSMUSG00000070462.4	Mesdc1	1064.43	0.357891	0.0520107	0.255304
ENSMUSG00000034165.16	Ccnd3	352.752	0.35752	0.023939	0.150556
ENSMUSG00000068587.9	Mgam	148.643	0.357329	0.278361	0.659011
ENSMUSG00000023249.14	Parp3	425.826	0.355738	0.0195727	0.129561
ENSMUSG00000005483.9	Dnajb1	1104.06	0.355463	0.0366577	0.202521
ENSMUSG00000018189.12	Uchl5	436.326	0.355381	0.0298989	0.175456
ENSMUSG00000022957.19	Itsn1	1348.38	0.355059	0.0244969	0.153053
ENSMUSG00000022218.15	Tgm1	90.8738	0.355031	0.192147	0.553717
ENSMUSG00000030008.9	Pradc1	130.032	0.354624	0.0837183	0.346282
ENSMUSG00000028923.14	Necap2	730.327	0.354537	0.0148955	0.106171
ENSMUSG00000054520.15	Sh3bp2	1298.8	0.354437	0.000479756	0.00658272
ENSMUSG00000037190.12	Cyb561d2	198.597	0.354356	0.11487	0.419683
ENSMUSG00000006576.16	Slc4a3	485.938	0.354154	0.0395966	0.213655
ENSMUSG00000026005.15	Rpe	497.085	0.353908	0.0563989	0.268736
ENSMUSG00000026154.4	Sdhaf4	176.143	0.352456	0.108769	0.407713
ENSMUSG00000078185.2	Chml	353.11	0.352255	0.0986401	0.384186
ENSMUSG00000026637.13	Traf5	92.7096	0.35223	0.126269	0.444263
ENSMUSG00000046675.6	Tmem251	178.477	0.351998	0.0760771	0.325573
ENSMUSG00000006517.4	Mvd	532.617	0.351906	0.0256349	0.158344
ENSMUSG00000033350.7	Chst2	523.779	0.351859	0.0434334	0.226565
ENSMUSG00000048534.6	Amica1	539.334	0.351768	0.0609629	0.283318
ENSMUSG00000032436.16	Cmtm7	467.261	0.351642	0.0651176	0.295888
ENSMUSG00000032218.6	Ccnb2	435.46	0.351547	0.00429092	0.0401083
ENSMUSG00000006456.10	Rbm14	645.539	0.351516	0.0178438	0.121194
ENSMUSG00000031604.10	Msmo1	585.556	0.351443	0.0239563	0.150615
ENSMUSG00000090659.8	Zfp493	69.3015	0.350407	0.210458	0.57767
ENSMUSG00000035439.13	Haus8	409.391	0.350247	0.0687808	0.306263
ENSMUSG00000006356.10	Crip2	910.288	0.350039	0.00341488	0.0332933
ENSMUSG00000026000.16	Lancl1	754.975	0.349965	0.0264257	0.161551
ENSMUSG00000089824.10	Rbm12	515.206	0.349302	0.0286613	0.170561
ENSMUSG00000023832.13	Acat2	270.441	0.348845	0.0637266	0.291955
ENSMUSG00000007476.18	Lrrc8a	358.687	0.348629	0.0372939	0.20469
ENSMUSG00000052137.11	Rbm12b2	263.249	0.34837	0.064014	0.292664
ENSMUSG00000011884.13	Gltp	746.894	0.347839	0.0044808	0.0414959
ENSMUSG00000029201.14	Ugdh	839.123	0.347609	0.00151354	0.0172274
ENSMUSG00000079560.13	Hoxa3	68.986	0.34735	0.203605	0.567988
ENSMUSG00000097589.9	NA	159.747	0.347121	0.0658192	0.297743
ENSMUSG00000106928.1	NA	63.8145	0.347113	0.169822	0.52085
ENSMUSG00000002885.14	Adgre5	591.494	0.347017	0.112986	0.415824
ENSMUSG00000016495.12	Plgrkt	473.19	0.346906	0.0306097	0.178489
ENSMUSG00000073987.4	Ggh	874.762	0.346628	0.0635957	0.291636
ENSMUSG00000014301.12	Pam16	63.261	0.346486	0.181337	0.539559
ENSMUSG00000027079.15	Clp1	333.839	0.346485	0.0740102	0.319613
ENSMUSG00000033751.5	Gadd45gip1	204.437	0.34616	0.0553001	0.265695
ENSMUSG00000060397.6	Zfp128	98.1926	0.346111	0.182996	0.541428
ENSMUSG00000051721.4	BC068281	118.089	0.346099	0.157	0.499224
ENSMUSG00000028640.11	Tfap2c	82.2834	0.346086	NA	NA
ENSMUSG00000031557.15	Plekha2	596.644	0.345913	0.0516648	0.254026
ENSMUSG00000036918.15	Ttc7	628.573	0.345759	0.0180955	0.122554
ENSMUSG00000058174.7	Gm5148	188.556	0.345628	0.223683	0.594291
ENSMUSG00000031966.6	Glb1l3	192.31	0.345355	0.402198	0.767936
ENSMUSG00000031232.16	Magt1	1327.13	0.345021	0.000235984	0.00363645
ENSMUSG00000028708.16	Mknk1	529.895	0.345007	0.0262874	0.16117
ENSMUSG00000002844.8	Adprh	533.186	0.344976	0.0334211	0.189805
ENSMUSG00000038695.12	Josd2	749.728	0.344904	0.0186644	0.125292
ENSMUSG00000053158.10	Fes	669.217	0.344801	0.0190651	0.127184
ENSMUSG00000032175.10	Tyk2	957.153	0.344789	0.0208186	0.136385
ENSMUSG00000022906.15	Parp9	857.773	0.344631	0.00184974	0.0202313
ENSMUSG00000026696.15	Vamp4	352.27	0.344619	0.0793221	0.334792
ENSMUSG00000052957.7	Gas1	2517.89	0.344301	0.00132411	0.0154595
ENSMUSG00000021594.10	Srd5a1	483.076	0.344092	0.0107817	0.0835788
ENSMUSG00000040877.15	Wdr25	275.329	0.343182	0.200882	0.564283
ENSMUSG00000078570.10	1110065P20Rik	170.745	0.343077	0.100908	0.388347
ENSMUSG00000028293.14	Slc35a1	416.307	0.342986	0.0326612	0.186715
ENSMUSG00000040234.16	Tm7sf3	598.544	0.342985	0.0172554	0.118338
ENSMUSG00000045094.7	Arhgef37	135.344	0.342957	0.239765	0.616119
ENSMUSG00000015702.13	Anxa9	56.4289	0.342949	0.213204	0.581051
ENSMUSG00000036894.3	Rap2b	249.362	0.342416	0.0898284	0.361881
ENSMUSG00000023147.15	Wrb	415.694	0.342099	0.0360165	0.2001
ENSMUSG00000044881.6	Coa4	69.9649	0.341663	0.182201	0.540356
ENSMUSG00000066235.6	Pomgnt2	228.688	0.341521	0.0945904	0.374352
ENSMUSG00000024150.11	Mcfd2	835.59	0.341486	0.00657911	0.0567061
ENSMUSG00000037826.5	Ppm1k	256.508	0.341398	0.110159	0.410745
ENSMUSG00000031875.6	Cmtm3	407.966	0.341165	0.072369	0.315545
ENSMUSG00000020492.11	Ska2	217.204	0.341057	0.0943588	0.373568
ENSMUSG00000051343.11	Rab11fip5	1091.11	0.340479	0.016005	0.111982
ENSMUSG00000036114.3	Rpp25l	267.9	0.340252	0.113757	0.417613
ENSMUSG00000056153.14	Socs6	659.746	0.34021	0.00380025	0.0364275
ENSMUSG00000042215.8	Bag2	163.811	0.3396	0.120629	0.431845
ENSMUSG00000004837.2	Grap	90.9707	0.33941	0.293002	0.674097
ENSMUSG00000056116.18	H2-T22	513.101	0.3393	0.117128	0.424771
ENSMUSG00000020400.17	Tnip1	1018.1	0.338934	0.0020422	0.0220074
ENSMUSG00000031543.18	Ank1	223.788	0.33858	0.412084	0.775299
ENSMUSG00000050786.8	Ccdc126	82.2309	0.338453	0.217631	0.586623
ENSMUSG00000065147.1	NA	55.7582	0.338395	0.235311	0.609113
ENSMUSG00000025034.8	Trim8	1504.87	0.337913	0.00572618	0.0506154
ENSMUSG00000040659.3	Efhd2	1033.51	0.337799	0.0160616	0.112295
ENSMUSG00000035722.15	Abca7	741.743	0.337529	0.0828213	0.344552
ENSMUSG00000045991.18	Onecut2	647.764	0.337528	0.310159	0.692746
ENSMUSG00000001053.15	N4bp3	1247.82	0.337498	0.00451869	0.0417384
ENSMUSG00000039452.5	Snx22	579.706	0.337025	0.0832888	0.345439
ENSMUSG00000054027.7	Nt5dc3	1163.51	0.336633	0.0400307	0.215022
ENSMUSG00000042787.13	Exog	197.765	0.336623	0.0311779	0.180857
ENSMUSG00000034035.18	Ccdc17	108.714	0.336553	0.184706	0.543549
ENSMUSG00000000058.6	Cav2	306.691	0.336333	0.0996042	0.38591
ENSMUSG00000001131.11	Timp1	169.296	0.336021	0.109365	0.408984
ENSMUSG00000032306.14	Mpi	498.166	0.335823	0.0121982	0.0920478
ENSMUSG00000056124.5	B4galt6	2403.94	0.335546	0.006849	0.0585812
ENSMUSG00000025059.16	Gk	210.476	0.335316	0.194847	0.557426
ENSMUSG00000015745.9	Plekho1	312.409	0.334329	0.264376	0.643992
ENSMUSG00000046997.5	Spsb4	159.342	0.334222	0.263716	0.643267
ENSMUSG00000029798.11	Herc6	149.786	0.334119	0.164223	0.511295
ENSMUSG00000009076.10	Zmat5	171.346	0.334111	0.0756229	0.324505
ENSMUSG00000040666.17	Sh3bgr	721.425	0.333952	0.0200944	0.132278
ENSMUSG00000041193.15	Pla2g5	1538.82	0.333834	0.0720188	0.314644
ENSMUSG00000089695.2	NA	59.1827	0.333806	0.18488	0.543895
ENSMUSG00000028461.12	Ccdc107	286.68	0.333706	0.0823695	0.343387
ENSMUSG00000036948.17	BC037034	785.794	0.333339	0.00576813	0.0509153
ENSMUSG00000032312.6	Csk	1088.73	0.33331	0.00221002	0.0235492
ENSMUSG00000032578.7	Cish	242.91	0.333268	0.173773	0.527614
ENSMUSG00000041483.14	Zfp281	427.019	0.333207	0.0432306	0.225836
ENSMUSG00000003882.4	Il7r	52.9509	0.333016	0.391297	0.760185
ENSMUSG00000020801.8	Med31	194.231	0.332716	0.0803352	0.337317
ENSMUSG00000026361.8	Cdc73	1678.21	0.332609	0.0307308	0.178795
ENSMUSG00000032202.11	Rab27a	247.898	0.332584	0.270044	0.649546
ENSMUSG00000025732.5	Fam195a	89.0336	0.33244	0.230357	0.603506
ENSMUSG00000028885.8	Smpdl3b	80.483	0.332027	0.363745	0.739552
ENSMUSG00000026433.13	Rab29	234.762	0.331946	0.0895993	0.361475
ENSMUSG00000054909.11	NA	86.0614	0.331781	0.138089	0.466878
ENSMUSG00000047514.6	Tspyl1	943.911	0.331732	0.00242094	0.0251902
ENSMUSG00000096847.1	Tmem151b	818.101	0.331572	0.150311	0.487636
ENSMUSG00000035069.3	Oma1	265.963	0.331401	0.0362542	0.201036
ENSMUSG00000051675.13	Trim32	693.71	0.331393	0.014491	0.104249
ENSMUSG00000028690.4	Mmachc	273.423	0.330836	0.0320325	0.184005
ENSMUSG00000024725.12	Ostf1	491.307	0.330536	0.0470349	0.238191
ENSMUSG00000035557.9	Krt17	797.461	0.330262	0.20648	0.571737
ENSMUSG00000037306.13	Man1c1	402.331	0.329728	0.0778666	0.330746
ENSMUSG00000011658.14	Fuz	542.152	0.329219	0.0178132	0.121072
ENSMUSG00000001665.10	Gstt3	502.277	0.328807	0.0733135	0.318327
ENSMUSG00000060708.4	Bloc1s4	205.963	0.328576	0.108956	0.408011
ENSMUSG00000102399.1	NA	52.1372	0.328341	0.311658	0.694273
ENSMUSG00000027660.16	Skil	2042.75	0.328338	0.0189773	0.126855
ENSMUSG00000049866.12	Arl4c	2516.54	0.328322	0.00832004	0.0681256
ENSMUSG00000068196.4	Col8a1	86.9655	0.328195	0.308591	0.691242
ENSMUSG00000027822.16	Slc33a1	503.079	0.328044	0.0884324	0.358615
ENSMUSG00000038895.15	Zfp653	352.688	0.327964	0.0665182	0.299694
ENSMUSG00000090877.3	Hspa1b	428.68	0.327889	0.250083	0.628295
ENSMUSG00000034152.5	Exoc3	967.318	0.32769	0.0102793	0.0803716
ENSMUSG00000041773.7	Enc1	2801.54	0.327571	0.0262491	0.16117
ENSMUSG00000021702.7	Thbs4	80.4825	0.327571	0.402114	0.767875
ENSMUSG00000029552.19	Tes	960.211	0.327403	0.00757248	0.0632903
ENSMUSG00000030554.15	Synm	70.0567	0.326818	0.273905	0.653793
ENSMUSG00000048706.3	Lurap1l	1893.57	0.326513	0.0419004	0.220949
ENSMUSG00000026421.14	Csrp1	1142.83	0.326365	0.0433884	0.226412
ENSMUSG00000056209.7	Npm3	71.6105	0.326308	0.177046	0.532367
ENSMUSG00000015533.8	Itga2	316.025	0.326115	0.25785	0.637622
ENSMUSG00000034587.8	NA	69.8044	0.326013	0.166449	0.514906
ENSMUSG00000020882.17	Cacnb1	551.38	0.325964	0.0559975	0.267545
ENSMUSG00000003752.9	Itpkc	404.716	0.32593	0.149356	0.48621
ENSMUSG00000020846.6	Fam101b	345.726	0.325928	0.107786	0.40547
ENSMUSG00000083708.1	NA	64.0082	0.325908	0.186114	0.545332
ENSMUSG00000001750.15	Tcirg1	1467.89	0.325886	0.00320268	0.0314663
ENSMUSG00000027811.9	4930579G24Rik	207.134	0.325795	0.133052	0.457144
ENSMUSG00000028850.2	Gpatch3	138.645	0.325381	0.0744674	0.321285
ENSMUSG00000011179.7	Odc1	291.758	0.325198	0.023461	0.148879
ENSMUSG00000027684.16	Mecom	1588.04	0.325042	0.210719	0.57767
ENSMUSG00000079260.2	Tmppe	423.655	0.324297	0.0519089	0.255002
ENSMUSG00000024805.15	Pcgf5	100.756	0.324268	0.157773	0.500301
ENSMUSG00000034201.13	Gas2l1	1154.24	0.324151	0.00329942	0.0323
ENSMUSG00000033862.6	Cdk10	419.89	0.324096	0.03902	0.211516
ENSMUSG00000049001.5	Ndnf	1131.03	0.32379	0.22205	0.592433
ENSMUSG00000032041.15	Tirap	376.175	0.323575	0.0938897	0.372486
ENSMUSG00000031333.7	Abcb7	991.05	0.323516	0.00485123	0.0442376
ENSMUSG00000039646.5	Vasn	930.296	0.323484	0.062884	0.289769
ENSMUSG00000083994.1	NA	81.133	0.323466	0.179181	0.536078
ENSMUSG00000000275.16	Trim25	971.475	0.323308	0.0303332	0.17732
ENSMUSG00000039191.12	Rbpj	533.814	0.323109	0.0248454	0.154622
ENSMUSG00000002332.15	Dhrs1	913.563	0.322733	0.0496849	0.247527
ENSMUSG00000060862.9	Zbtb40	478.667	0.322674	0.105077	0.398511
ENSMUSG00000106990.1	NA	159.726	0.322612	0.0976565	0.381701
ENSMUSG00000028969.10	Cdk5	734.301	0.322419	0.0294841	0.17375
ENSMUSG00000029428.13	Stx2	315.278	0.322269	0.020005	0.131781
ENSMUSG00000005397.7	Nid1	964.992	0.322212	0.166146	0.514189
ENSMUSG00000026070.15	Il18r1	103.243	0.322205	0.428421	0.786152
ENSMUSG00000097616.7	NA	58.1075	0.322181	0.316676	0.698582
ENSMUSG00000039611.2	Tmem246	191.543	0.321973	0.230876	0.604281
ENSMUSG00000046794.8	Ppp1r3b	925.655	0.321933	0.118029	0.426713
ENSMUSG00000038217.13	Tlcd2	230.887	0.321908	0.134902	0.460505
ENSMUSG00000033967.4	Rnf225	63.0665	0.321428	0.313751	0.695677
ENSMUSG00000037904.14	Ankrd9	193.382	0.321274	0.129205	0.448665
ENSMUSG00000054894.5	Atp5s	177.597	0.321017	0.114303	0.418812
ENSMUSG00000055401.14	Fbxo6	178.306	0.320265	0.147359	0.482765
ENSMUSG00000025813.13	Homer2	680.924	0.319928	NA	NA
ENSMUSG00000062753.13	AI413582	128.474	0.319669	0.229395	0.602228
ENSMUSG00000026869.12	Psmd5	761.19	0.319647	0.0294783	0.17375
ENSMUSG00000037553.14	Zdhhc18	732.122	0.319491	0.0115464	0.0883231
ENSMUSG00000049285.4	Mblac1	92.3161	0.319444	0.165465	0.51307
ENSMUSG00000026782.15	Abi2	2082	0.319213	0.0446221	0.230449
ENSMUSG00000003402.13	Prkcsh	1355.49	0.319102	0.00133447	0.015552
ENSMUSG00000026248.9	Mrpl44	397.677	0.318907	0.0509453	0.252091
ENSMUSG00000026240.12	Cops7b	365.753	0.318876	0.0446076	0.230436
ENSMUSG00000025202.7	Scd3	185.813	0.318806	0.302786	0.685257
ENSMUSG00000043501.4	Lgals2	62.6854	0.318724	0.277249	0.657699
ENSMUSG00000010554.14	Mettl16	716.866	0.31862	0.0074413	0.0624682
ENSMUSG00000034403.16	Pja1	1251.75	0.318193	0.0190059	0.126958
ENSMUSG00000024074.7	Crim1	739.514	0.318178	0.108944	0.408011
ENSMUSG00000032115.13	Hyou1	2245.14	0.318059	0.00965872	0.0766073
ENSMUSG00000022021.13	Diaph3	196.253	0.318049	0.11261	0.415292
ENSMUSG00000073982.10	Rhog	485.366	0.317662	0.0253581	0.156991
ENSMUSG00000104453.1	NA	54.9619	0.317267	0.225863	0.597831
ENSMUSG00000022070.6	Bora	335.865	0.317157	0.0240195	0.150913
ENSMUSG00000044768.16	D1Ertd622e	363.566	0.316959	0.031957	0.183794
ENSMUSG00000031953.1	Tmem170	185.46	0.316868	0.102667	0.392733
ENSMUSG00000009293.17	Ube2g2	580.164	0.316275	0.05447	0.26316
ENSMUSG00000021177.15	Tdp1	233.805	0.316262	0.0411957	0.219116
ENSMUSG00000024480.7	Ap3s1	150.445	0.316257	0.0849056	0.350023
ENSMUSG00000027955.16	Fam198b	648.751	0.316094	0.301579	0.684476
ENSMUSG00000038489.8	Polr2l	53.2696	0.316035	0.256484	0.636353
ENSMUSG00000031327.10	Chic1	361.992	0.315811	0.268929	0.648243
ENSMUSG00000021951.5	Eef1akmt1	160.012	0.315694	0.183071	0.541428
ENSMUSG00000026558.13	Uck2	2148.89	0.315609	0.0619922	0.286562
ENSMUSG00000021281.15	Tnfaip2	1972.36	0.3156	0.221436	0.591881
ENSMUSG00000034685.4	Fam171a2	184.01	0.315544	0.0996256	0.38591
ENSMUSG00000096433.1	Gm4944	187.333	0.314941	0.0910355	0.364736
ENSMUSG00000007950.8	Abhd8	884.409	0.314808	0.0214638	0.13965
ENSMUSG00000045268.13	Zfp691	155.233	0.314667	0.111073	0.412423
ENSMUSG00000059857.15	Ntng1	206.494	0.314563	0.445822	0.797879
ENSMUSG00000041958.10	Pigs	714.086	0.314502	0.0104741	0.0816937
ENSMUSG00000013523.13	Bcas1	138.224	0.314398	0.303369	0.686093
ENSMUSG00000030826.17	Bcat2	588.396	0.314063	0.0324478	0.185775
ENSMUSG00000020884.15	Asgr1	51.0901	0.313797	0.406857	0.771512
ENSMUSG00000032370.7	Lactb	109.696	0.313783	0.147317	0.482711
ENSMUSG00000001630.13	Stk38l	492.223	0.313697	0.0159911	0.111952
ENSMUSG00000094114.1	Gm21967	56.436	0.313627	0.338079	0.719575
ENSMUSG00000001700.9	Gramd3	732.201	0.313446	0.0454457	0.233121
ENSMUSG00000026411.17	Tmem9	941.728	0.313441	0.041696	0.220415
ENSMUSG00000035443.9	Thyn1	102.938	0.313324	0.156742	0.499073
ENSMUSG00000031266.6	Gla	434.829	0.313051	0.142625	0.475025
ENSMUSG00000058454.14	Dhcr7	567.16	0.31305	0.0439795	0.228299
ENSMUSG00000030335.6	Mrpl51	271.212	0.313	0.0377516	0.206749
ENSMUSG00000028882.13	Ppp1r8	753.063	0.312972	0.0210492	0.137376
ENSMUSG00000070953.13	Rabepk	425.422	0.312875	0.0412779	0.219369
ENSMUSG00000061887.14	Ssbp3	859.087	0.312547	0.0468708	0.237613
ENSMUSG00000005267.13	Zfp287	70.7908	0.312508	0.32531	0.707701
ENSMUSG00000032598.8	Nckipsd	316.595	0.312289	0.0660044	0.298155
ENSMUSG00000020921.6	Tmem101	335.664	0.311994	0.0650537	0.295888
ENSMUSG00000025075.14	Habp2	470.876	0.311964	0.166813	0.515206
ENSMUSG00000035835.14	Plppr3	143.525	0.311556	0.146519	0.481923
ENSMUSG00000048486.6	Fitm2	218.922	0.311297	0.112771	0.415517
ENSMUSG00000031286.6	Glt28d2	156.138	0.311052	0.200446	0.563703
ENSMUSG00000022973.17	Synj1	860.103	0.310588	0.0858383	0.352066
ENSMUSG00000031652.10	N4bp1	1191.16	0.310528	0.0248812	0.154743
ENSMUSG00000038280.12	Ostm1	406.247	0.309716	0.0263041	0.16117
ENSMUSG00000033826.9	Dnah8	70.7702	0.309546	0.351065	0.729493
ENSMUSG00000000378.15	Ccm2	587.756	0.309505	0.0341119	0.192579
ENSMUSG00000037601.11	Nme1	201.956	0.309471	0.0835298	0.345803
ENSMUSG00000022969.13	Il10rb	479.713	0.309424	0.0415129	0.220019
ENSMUSG00000041079.11	Rwdd2b	213.221	0.309285	0.186	0.545083
ENSMUSG00000019261.2	Map1s	637.693	0.309061	0.0302949	0.177234
ENSMUSG00000021360.15	Gcnt2	192.76	0.308953	0.41297	0.77599
ENSMUSG00000030493.13	Faap24	113.063	0.308932	0.129202	0.448665
ENSMUSG00000020415.16	Pttg1	511.987	0.308793	0.107117	0.403831
ENSMUSG00000044252.17	Osbpl1a	1072.85	0.308624	0.0160674	0.112295
ENSMUSG00000031534.14	Smim19	349.587	0.308514	0.125008	0.442034
ENSMUSG00000022439.9	Parvg	306.026	0.308453	0.0913006	0.36549
ENSMUSG00000026048.16	Ercc5	435.433	0.308153	0.0954591	0.376436
ENSMUSG00000089832.8	Shkbp1	492.315	0.308102	0.0869157	0.354879
ENSMUSG00000032841.15	Prr5l	67.3793	0.30799	0.347441	0.726927
ENSMUSG00000102252.5	Snrpn	257.549	0.307767	0.122014	0.434596
ENSMUSG00000026222.16	Sp100	307.693	0.307761	0.114872	0.419683
ENSMUSG00000042363.14	Lgalsl	860.484	0.307075	0.0812352	0.339927
ENSMUSG00000097340.1	NA	126.702	0.307033	0.152996	0.491765
ENSMUSG00000063856.7	Gpx1	787.73	0.306783	0.0396776	0.213911
ENSMUSG00000042349.13	Ikbke	862.876	0.306722	0.0645337	0.294448
ENSMUSG00000032059.13	Alg9	492.774	0.306705	0.0167525	0.11571
ENSMUSG00000032590.14	Apeh	1100.9	0.306603	0.0140003	0.101656
ENSMUSG00000037408.10	Cnnm4	448.914	0.306204	0.150582	0.488155
ENSMUSG00000022842.16	Ece2	151.541	0.305937	0.160936	0.505242
ENSMUSG00000021118.7	Plek2	239.826	0.305852	0.0428507	0.224182
ENSMUSG00000032796.7	Lama1	271.455	0.305801	0.399359	0.765686
ENSMUSG00000046949.15	Nqo2	278.008	0.30529	0.127125	0.445794
ENSMUSG00000086712.2	NA	331.629	0.305151	0.21301	0.580773
ENSMUSG00000073889.10	Il11ra1	542.816	0.304916	0.110987	0.412237
ENSMUSG00000038628.8	Polr3k	597.232	0.304791	0.0576714	0.272783
ENSMUSG00000039159.16	Ube2h	1366.75	0.304614	0.023084	0.147222
ENSMUSG00000034640.9	Tiparp	736.837	0.304455	0.239821	0.616178
ENSMUSG00000042198.12	Chchd7	237.855	0.304431	0.119023	0.428756
ENSMUSG00000040562.12	Gstm2	118.634	0.304258	0.168819	0.518693
ENSMUSG00000040009.5	Gnaz	90.3178	0.304025	0.433527	0.789894
ENSMUSG00000053801.16	Grwd1	380.363	0.303619	0.137231	0.465784
ENSMUSG00000089762.3	Ier5l	607.157	0.303266	0.183161	0.541431
ENSMUSG00000071547.3	Nt5dc2	92.1171	0.303241	0.201241	0.564653
ENSMUSG00000037573.5	Tob1	1498.01	0.303086	0.0292576	0.172866
ENSMUSG00000050471.16	Fam118b	335.597	0.302786	0.0349785	0.196147
ENSMUSG00000027540.13	Ptpn1	935.678	0.302324	0.046775	0.237441
ENSMUSG00000046572.10	Zfp518b	541.554	0.302161	0.23135	0.604782
ENSMUSG00000039485.7	Tspyl4	70.9449	0.30165	0.297248	0.67951
ENSMUSG00000044303.6	Cdkn2a	690.095	0.301502	0.0229915	0.146829
ENSMUSG00000001300.15	Efnb2	515.377	0.301281	0.132154	0.455043
ENSMUSG00000045917.17	6330416G13Rik	189.095	0.300858	0.146133	0.481486
ENSMUSG00000045886.6	Gm9803	158.97	0.300791	0.157344	0.499839
ENSMUSG00000004947.15	Dtx2	351.273	0.300681	0.0830161	0.344993
ENSMUSG00000027739.9	Rab33b	345.041	0.300528	0.104744	0.397894
ENSMUSG00000019464.5	Ptger1	637.786	0.300431	0.0834106	0.345439
ENSMUSG00000027630.13	Tbl1xr1	989.748	0.300007	0.0133485	0.0982726
ENSMUSG00000042042.14	Csgalnact2	379.647	0.299963	0.0265477	0.161984
ENSMUSG00000028035.13	Dnajb4	520.271	0.299791	0.176977	0.532246
ENSMUSG00000033096.7	Apmap	547.45	0.299774	0.0440605	0.228573
ENSMUSG00000031722.9	Hp	707.428	0.299661	0.208295	0.574419
ENSMUSG00000008450.7	Nutf2	123.045	0.299223	0.173337	0.527056
ENSMUSG00000021871.17	Pnp	398.809	0.299211	0.0883526	0.358592
ENSMUSG00000071037.5	Camkmt	94.034	0.299143	0.171593	0.524004
ENSMUSG00000021792.15	Fam213a	743.703	0.299038	0.145065	0.479377
ENSMUSG00000020831.18	0610010K14Rik	66.7257	0.299018	0.221434	0.591881
ENSMUSG00000026979.16	Psd4	208.643	0.298818	0.351433	0.729493
ENSMUSG00000022052.8	Ppp2r2a	927.375	0.298557	0.0443607	0.229472
ENSMUSG00000041930.7	Fam222a	654.714	0.298283	0.0657632	0.29756
ENSMUSG00000031478.16	Nek3	152.435	0.298158	0.139932	0.470111
ENSMUSG00000022240.9	Ctnnd2	678.266	0.297981	0.371541	0.74618
ENSMUSG00000026019.15	Wdr12	302.461	0.297565	0.03923	0.21234
ENSMUSG00000010045.2	Tmem115	594.888	0.297511	0.0730341	0.317404
ENSMUSG00000037070.8	Rbmxl1	144.353	0.297509	0.11305	0.415901
ENSMUSG00000025645.8	Ccdc51	223.267	0.297297	0.146777	0.482436
ENSMUSG00000037628.9	Cdkn3	76.2655	0.297024	0.179252	0.536207
ENSMUSG00000042726.14	Trafd1	992.353	0.29701	0.0114811	0.0879343
ENSMUSG00000020571.12	Pdia6	1433.8	0.296776	0.00733067	0.0617332
ENSMUSG00000056185.4	Snx32	144.248	0.296547	0.284349	0.665229
ENSMUSG00000089862.8	Umad1	159.716	0.29654	0.108409	0.407143
ENSMUSG00000091931.5	AK010878	133.04	0.296499	0.162749	0.50875
ENSMUSG00000029001.15	Fbxo44	352.935	0.296199	0.190701	0.551856
ENSMUSG00000020022.16	Ndufa12	151.925	0.296139	0.0974698	0.381284
ENSMUSG00000001763.14	Tspan33	62.6325	0.295881	0.365408	0.740937
ENSMUSG00000031156.17	Slc35a2	403.555	0.295837	0.0678051	0.303427
ENSMUSG00000021548.10	Ccnh	514.28	0.295798	0.0465772	0.236815
ENSMUSG00000038244.13	Mical2	628.432	0.295539	0.292752	0.673762
ENSMUSG00000051037.15	Zfp455	63.6842	0.295523	0.277674	0.658167
ENSMUSG00000018932.9	Map2k3	964.076	0.295468	0.0183206	0.123638
ENSMUSG00000086316.7	2210013O21Rik	172.256	0.29519	0.206745	0.572251
ENSMUSG00000031671.10	Setd6	167.257	0.295184	0.0906979	0.36392
ENSMUSG00000097908.7	NA	172.633	0.295082	0.0741303	0.319976
ENSMUSG00000003382.18	Etv3	1590.03	0.295063	0.0532178	0.258827
ENSMUSG00000075706.10	Gpx4	288.581	0.294968	0.0967312	0.379486
ENSMUSG00000026956.15	Uap1l1	366.628	0.294904	0.227768	0.599785
ENSMUSG00000029569.9	Tmem168	567.308	0.294897	0.014878	0.106133
ENSMUSG00000057130.11	Txnl4a	294.469	0.294753	0.127119	0.445794
ENSMUSG00000055313.14	Pgbd1	68.4916	0.294714	0.346291	0.725732
ENSMUSG00000036430.7	Tbcc	259.366	0.29468	0.139148	0.468378
ENSMUSG00000000884.16	Gnb1l	277.879	0.294421	0.135478	0.461891
ENSMUSG00000045095.16	Magi1	1744.4	0.294416	0.130244	0.450846
ENSMUSG00000087264.1	NA	68.1064	0.294395	0.276692	0.657147
ENSMUSG00000020986.13	Sec23a	716.41	0.294308	0.00702347	0.0596979
ENSMUSG00000034317.14	Trim59	507.749	0.294304	0.0632929	0.290917
ENSMUSG00000021451.15	Sema4d	1372.71	0.294061	0.0196593	0.130089
ENSMUSG00000097820.2	NA	83.7138	0.294053	0.289231	0.670364
ENSMUSG00000045838.8	A430105I19Rik	94.2907	0.294033	0.237858	0.613621
ENSMUSG00000028145.9	Them4	117.02	0.293793	0.175835	0.530739
ENSMUSG00000040543.16	Pitpnm3	1071.01	0.293666	0.296531	0.678687
ENSMUSG00000057497.8	Fam136a	302.282	0.293369	0.0488102	0.244444
ENSMUSG00000097365.7	NA	131.544	0.292829	0.396319	0.763799
ENSMUSG00000030060.14	Hmces	402.098	0.292752	0.0513633	0.253106
ENSMUSG00000001588.12	Acap1	113.928	0.292579	0.318466	0.700667
ENSMUSG00000013495.15	Tmem175	302.626	0.292571	0.149172	0.486029
ENSMUSG00000102426.1	NA	123.934	0.292197	0.214181	0.582297
ENSMUSG00000091900.2	Gm4353	64.6135	0.292124	0.244604	0.622018
ENSMUSG00000003068.15	Stk11	1536.07	0.292033	0.0025071	0.0259776
[truncated: 11,157 more rows]

## Sheet: Table S4
Table S4	Differential gene expression analysis (RNA sequencing) in sorted Pdgfra-positive mouse CAFs from control and Sfrp1-expressing subcutaneous tumors (Rag1 mice).
Ensembl gene ID	gene name	mean normalized counts	fold change (log2)	p-value	adj. p-value
ENSMUSG00000000204.15	Slfn4	804.629	1.16777	0.00445478	0.999466
ENSMUSG00000085126.1	Gm12589	25.7267	1.10419	0.00770866	0.999466
ENSMUSG00000001622.15	Csn3	219.293	1.00798	0.0174419	0.999466
ENSMUSG00000024675.19	Ms4a4c	347.107	0.981237	0.0158486	0.999466
ENSMUSG00000073491.10	Ifi213	148.235	0.967638	0.0115423	0.999466
ENSMUSG00000107603.1	Gm43921	56.6479	0.942067	0.0112848	0.999466
ENSMUSG00000079339.6	Ifit1bl1	42.0786	0.905284	0.032898	0.999466
ENSMUSG00000020641.15	Rsad2	1151.16	0.904067	0.0151669	0.999466
ENSMUSG00000050994.19	Adgb	42.5418	0.903874	0.0303031	0.999466
ENSMUSG00000022586.11	Ly6i	91.2724	0.876908	0.0381422	0.999466
ENSMUSG00000045932.12	Ifit2	1556.49	0.852998	0.0190991	0.999466
ENSMUSG00000003882.4	Il7r	538.074	0.841482	0.0442714	0.999466
ENSMUSG00000087365.7	C430049B03Rik	27.2396	0.841393	0.03035	0.999466
ENSMUSG00000037849.7	Ifi206	219.104	0.836265	0.0439092	0.999466
ENSMUSG00000043263.13	Ifi209	403.835	0.833693	0.0443979	0.999466
ENSMUSG00000044703.5	Phf11a	60.314	0.83335	0.0351491	0.999466
ENSMUSG00000054434.14	Tmem120b	37.6728	0.826145	0.0172672	0.999466
ENSMUSG00000047875.6	Gpr157	61.222	0.783972	0.064169	0.999466
ENSMUSG00000074867.3	Zfp808	32.6103	0.775953	0.014269	0.999466
ENSMUSG00000078763.2	Slfn1	458.14	0.766137	0.0642943	0.999466
ENSMUSG00000089901.1	Gm8113	37.1439	0.759483	0.0293123	0.999466
ENSMUSG00000066677.11	Ifi208	57.8632	0.75899	0.0682594	0.999466
ENSMUSG00000086784.1	Isoc2a	44.151	0.755276	0.0100494	0.999466
ENSMUSG00000028037.13	Ifi44	228.542	0.750051	0.0669477	0.999466
ENSMUSG00000047798.15	Cd300lf	943.689	0.746228	0.0703664	0.999466
ENSMUSG00000043085.14	Tmem82	33.4249	0.736946	0.062826	0.999466
ENSMUSG00000090222.1	Ifi203-ps	37.3845	0.728287	0.0367823	0.999466
ENSMUSG00000066861.14	Oas1g	96.512	0.719203	0.0654404	0.999466
ENSMUSG00000005800.2	Mmp8	176.518	0.718483	0.0753142	0.999466
ENSMUSG00000091649.3	Phf11b	270.626	0.706326	0.0359733	0.999466
ENSMUSG00000037921.14	Ddx60	335.003	0.706087	0.0255662	0.999466
ENSMUSG00000078307.2	AI593442	53.3771	0.698767	0.0990189	0.999466
ENSMUSG00000000386.14	Mx1	270.603	0.694925	0.0924806	0.999466
ENSMUSG00000009876.13	Cox4i2	56.755	0.686055	0.0843555	0.999466
ENSMUSG00000090877.3	Hspa1b	61.2265	0.683992	0.0639275	0.999466
ENSMUSG00000032661.9	Oas3	331.243	0.683112	0.0993584	0.999466
ENSMUSG00000033595.6	Lgi3	109.391	0.681187	0.0924765	0.999466
ENSMUSG00000048216.13	Gpr85	43.5665	0.675403	0.095699	0.999466
ENSMUSG00000037224.15	Zfyve28	33.9597	0.669643	0.0843926	0.999466
ENSMUSG00000031266.6	Gla	698.425	0.661471	0.0892437	0.999466
ENSMUSG00000019564.12	Arid3a	103.25	0.660897	0.0842282	0.999466
ENSMUSG00000032690.16	Oas2	412.874	0.660861	0.0555846	0.999466
ENSMUSG00000001166.17	Oas1c	36.3677	0.654218	0.0618605	0.999466
ENSMUSG00000041117.8	Ccdc8	206.411	0.651369	0.0435546	0.999466
ENSMUSG00000085295.7	4930430E12Rik	167.728	0.642949	0.124597	0.999466
ENSMUSG00000027514.14	Zbp1	850.485	0.641632	0.0225863	0.999466
ENSMUSG00000097113.7	Gm19705	29.5998	0.639016	0.0892227	0.999466
ENSMUSG00000031097.14	Tnni2	65.9602	0.634267	0.0776459	0.999466
ENSMUSG00000078780.7	Gm5150	108.612	0.631605	0.135532	0.999466
ENSMUSG00000027322.11	Siglec1	188.433	0.628398	0.1389	0.999466
ENSMUSG00000064179.13	Tnnt1	40.197	0.62301	0.1133	0.999466
ENSMUSG00000031340.8	Gabre	84.4054	0.621676	0.124461	0.999466
ENSMUSG00000053004.9	Hrh1	37.7254	0.618621	0.140056	0.999466
ENSMUSG00000097183.2	Gm17501	137.447	0.617231	0.0991628	0.999466
ENSMUSG00000099843.1	Gm7160	44.0448	0.616339	0.0836432	0.999466
ENSMUSG00000041827.15	Oasl1	550.221	0.611611	0.0869761	0.999466
ENSMUSG00000050957.4	Insl6	86.2239	0.611568	0.134336	0.999466
ENSMUSG00000100843.1	Gm8307	33.2082	0.611243	0.122366	0.999466
ENSMUSG00000072653.12	Zfp783	161.322	0.610273	0.123232	0.999466
ENSMUSG00000052572.15	Dlg2	120.807	0.606456	0.119944	0.999466
ENSMUSG00000020826.6	Nos2	1105.92	0.606437	0.153657	0.999466
ENSMUSG00000102813.1	Gm37795	84.8499	0.60012	0.157211	0.999466
ENSMUSG00000097715.1	Gpr137b-ps	211.02	0.598511	0.141012	0.999466
ENSMUSG00000074579.13	Lekr1	69.7548	0.594524	0.0177064	0.999466
ENSMUSG00000026928.14	Card9	46.4672	0.592806	0.153991	0.999466
ENSMUSG00000091971.3	Hspa1a	204.426	0.591715	0.118908	0.999466
ENSMUSG00000056952.13	Tatdn2	62.68	0.590755	0.0977607	0.999466
ENSMUSG00000037161.14	Mgarp	346.746	0.589673	0.0549694	0.999466
ENSMUSG00000022584.14	Ly6c2	97.3613	0.5874	0.134708	0.999466
ENSMUSG00000099632.1	2900093K20Rik	29.053	0.586838	0.105062	0.999466
ENSMUSG00000004707.14	Ly9	349.363	0.585013	0.167279	0.999466
ENSMUSG00000033826.9	Dnah8	37.3091	0.584082	0.0794107	0.999466
ENSMUSG00000038608.15	Dock10	381.78	0.580909	0.12074	0.999466
ENSMUSG00000014074.17	Rnf168	168.689	0.580713	0.0305995	0.999466
ENSMUSG00000102059.1	Gm20257	34.1941	0.580615	0.107938	0.999466
ENSMUSG00000032750.13	Gab3	103.522	0.576588	0.1273	0.999466
ENSMUSG00000036611.5	Eepd1	142.471	0.575652	0.161532	0.999466
ENSMUSG00000098702.1	1500015A07Rik	31.4171	0.575091	0.127927	0.999466
ENSMUSG00000049719.14	Prss46	144.704	0.573694	0.174604	0.999466
ENSMUSG00000086763.1	Plxna4os1	81.964	0.573665	0.177246	0.999466
ENSMUSG00000108436.1	Gm44851	166.444	0.573554	0.177265	0.999466
ENSMUSG00000018547.8	Pip4k2b	67.2491	0.572588	0.0935361	0.999466
ENSMUSG00000042826.13	Fgf11	39.5263	0.571486	0.108602	0.999466
ENSMUSG00000096780.7	Tmem181b-ps	78.209	0.570459	0.085908	0.999466
ENSMUSG00000033860.13	Fgg	199.027	0.569998	0.178978	0.999466
ENSMUSG00000075416.5	Gm14488	28.5847	0.568166	0.131743	0.999466
ENSMUSG00000040842.17	Szrd1	1183.19	0.568036	0.0250198	0.999466
ENSMUSG00000086150.1	Bach2os	39.714	0.565712	0.182356	0.999466
ENSMUSG00000042369.8	Rbm45	148.242	0.56473	0.122333	0.999466
ENSMUSG00000020831.18	0610010K14Rik	27.1307	0.56254	0.122231	0.999466
ENSMUSG00000034459.8	Ifit1	1421.23	0.56116	0.142672	0.999466
ENSMUSG00000049307.5	Fut4	51.2389	0.560872	0.151254	0.999466
ENSMUSG00000062488.9	Ifit3b	219.605	0.5578	0.100932	0.999466
ENSMUSG00000059108.3	Ifitm6	55.793	0.557014	0.142532	0.999466
ENSMUSG00000027698.14	Nceh1	674.572	0.5569	0.154043	0.999466
ENSMUSG00000017830.15	Dhx58	677.627	0.555581	0.0683001	0.999466
ENSMUSG00000025044.15	Msr1	1501.24	0.552809	0.187168	0.999466
ENSMUSG00000104273.1	A530064N14Rik	38.3314	0.54866	0.131661	0.999466
ENSMUSG00000040310.12	Alx4	142.635	0.546864	0.179653	0.999466
ENSMUSG00000074896.3	Ifit3	744.581	0.544946	0.107644	0.999466
ENSMUSG00000103609.1	Gm37022	38.6531	0.544504	0.185804	0.999466
ENSMUSG00000104164.1	Gm38248	27.8756	0.542904	0.19658	0.999466
ENSMUSG00000030406.7	Gipr	38.6065	0.539724	0.204173	0.999466
ENSMUSG00000051147.9	Nat2	103.779	0.539618	0.030845	0.999466
ENSMUSG00000022305.12	Lrp12	362.63	0.53765	0.148471	0.999466
ENSMUSG00000052676.16	Zmat1	75.5153	0.537586	0.095531	0.999466
ENSMUSG00000048752.7	Prss50	51.5509	0.536833	0.191523	0.999466
ENSMUSG00000063286.6	Gm8995	400.62	0.536227	0.206218	0.999466
ENSMUSG00000081121.1	Gm12791	38.4845	0.535001	0.131244	0.999466
ENSMUSG00000053835.17	H2-T24	300.75	0.534314	0.0304205	0.999466
ENSMUSG00000027175.10	Tcp11l1	38.0372	0.533421	0.104642	0.999466
ENSMUSG00000078607.3	1810010H24Rik	34.7334	0.531788	0.184789	0.999466
ENSMUSG00000002997.15	Prkar2b	28.9418	0.531531	0.191938	0.999466
ENSMUSG00000067916.9	Zfp991	30.1681	0.530619	0.16002	0.999466
ENSMUSG00000040829.14	Zmynd15	737.709	0.528917	0.202618	0.999466
ENSMUSG00000040528.15	Milr1	385.912	0.528043	0.203261	0.999466
ENSMUSG00000105677.1	Gm43328	28.667	0.527258	0.121464	0.999466
ENSMUSG00000069893.10	9930111J21Rik1	74.5003	0.526245	0.150429	0.999466
ENSMUSG00000097418.7	Mir155hg	27.318	0.526169	0.160018	0.999466
ENSMUSG00000032291.8	Crabp1	501.175	0.525704	0.192592	0.999466
ENSMUSG00000004952.13	Rasa4	654.228	0.522028	0.205432	0.999466
ENSMUSG00000015947.10	Fcgr1	808.281	0.521792	0.207563	0.999466
ENSMUSG00000103818.1	Gm38009	32.7527	0.520814	0.197167	0.999466
ENSMUSG00000020024.6	Cep83	156.167	0.519938	0.0700185	0.999466
ENSMUSG00000016496.7	Cd274	1256.9	0.519851	0.209179	0.999466
ENSMUSG00000038352.15	Arl5c	355.291	0.518131	0.186152	0.999466
ENSMUSG00000045065.7	9930022D16Rik	54.4123	0.515653	0.222695	0.999466
ENSMUSG00000036052.14	Dnajb5	320.97	0.514938	0.0659615	0.999466
ENSMUSG00000103882.1	Gm37452	40.4113	0.51433	0.178212	0.999466
ENSMUSG00000043157.7	Arl11	255.414	0.513841	0.224803	0.999466
ENSMUSG00000087213.2	2810408I11Rik	38.2481	0.513375	0.181833	0.999466
ENSMUSG00000036560.14	Lgi4	172.038	0.511124	0.18776	0.999466
ENSMUSG00000002992.16	Apoc2	247.675	0.510533	0.216792	0.999466
ENSMUSG00000026896.14	Ifih1	928.404	0.50928	0.126637	0.999466
ENSMUSG00000099974.1	Bcl2a1d	66.312	0.50891	0.226257	0.999466
ENSMUSG00000062093.4	Gm10110	29.8908	0.507669	0.105563	0.999466
ENSMUSG00000019876.15	Pkib	141.282	0.506385	0.23215	0.999466
ENSMUSG00000025271.13	Pfkfb1	30.2087	0.506239	0.209635	0.999466
ENSMUSG00000102340.1	NA	67.5127	0.505959	0.181587	0.999466
ENSMUSG00000108267.1	Gm44190	42.6698	0.504034	0.12128	0.999466
ENSMUSG00000052631.14	Sh2d6	68.3348	0.503711	0.202405	0.999466
ENSMUSG00000030156.5	Cd69	307.819	0.503657	0.230777	0.999466
ENSMUSG00000081541.1	Gm13940	30.0019	0.502591	0.165666	0.999466
ENSMUSG00000054944.7	5330416C01Rik	35.6758	0.501952	0.185989	0.999466
ENSMUSG00000060288.13	Ppih	50.5706	0.501226	0.063582	0.999466
ENSMUSG00000010461.14	Eya4	134.783	0.499917	0.18694	0.999466
ENSMUSG00000024737.2	Slc15a3	386.772	0.499284	0.235321	0.999466
ENSMUSG00000090069.2	E430024P14Rik	29.6949	0.499012	0.236617	0.999466
ENSMUSG00000069793.11	Slfn9	244.9	0.498415	0.0531213	0.999466
ENSMUSG00000068122.10	Agtr2	665.74	0.498189	0.221599	0.999466
ENSMUSG00000036923.12	Stox1	29.754	0.498174	0.216752	0.999466
ENSMUSG00000013584.5	Aldh1a2	158.909	0.496489	0.242614	0.999466
ENSMUSG00000038843.17	Gcnt1	203.858	0.49571	0.24263	0.999466
ENSMUSG00000020638.7	Cmpk2	115.783	0.495323	0.189702	0.999466
ENSMUSG00000056501.3	Cebpb	156.444	0.494444	0.0968696	0.999466
ENSMUSG00000030157.5	Clec2d	196.985	0.494149	0.137365	0.999466
ENSMUSG00000043487.3	Acot6	41.7522	0.493377	0.125801	0.999466
ENSMUSG00000032204.13	Aqp9	56.7397	0.493344	0.232589	0.999466
ENSMUSG00000060131.11	Atp8b4	211.247	0.492559	0.246466	0.999466
ENSMUSG00000063687.3	Pcdhb5	80.5364	0.491428	0.0829484	0.999466
ENSMUSG00000050157.5	Gm867	30.9428	0.490552	0.24454	0.999466
ENSMUSG00000021306.10	Gpr137b	272.007	0.490322	0.210212	0.999466
ENSMUSG00000074677.11	Sirpb1c	171.596	0.49032	0.247441	0.999466
ENSMUSG00000021591.7	Glrx	630.33	0.490029	0.151666	0.999466
ENSMUSG00000107134.1	Gm42528	26.2245	0.489656	0.246134	0.999466
ENSMUSG00000097430.2	Gm10544	36.0264	0.489635	0.239542	0.999466
ENSMUSG00000045763.7	Basp1	509.94	0.489588	0.0745006	0.999466
ENSMUSG00000102037.1	Bcl2a1a	92.5941	0.488017	0.243902	0.999466
ENSMUSG00000045031.18	Cetn4	53.8237	0.486219	0.218032	0.999466
ENSMUSG00000046667.14	Rbm12b1	42.3211	0.486072	0.135598	0.999466
ENSMUSG00000104476.1	Gm38211	171.889	0.485896	0.224651	0.999466
ENSMUSG00000044906.4	4930503L19Rik	220.88	0.485766	0.195751	0.999466
ENSMUSG00000043251.5	Exoc3l	34.3951	0.485002	0.191398	0.999466
ENSMUSG00000089672.4	NA	1304.62	0.484902	0.193559	0.999466
ENSMUSG00000022901.13	Cd86	724.89	0.484878	0.250683	0.999466
ENSMUSG00000020399.14	Havcr2	271.277	0.483692	0.255049	0.999466
ENSMUSG00000016239.11	Lonrf3	74.3344	0.483013	0.245302	0.999466
ENSMUSG00000030145.14	Zfp248	133.15	0.481189	0.149419	0.999466
ENSMUSG00000034959.7	Rubcnl	61.2009	0.481111	0.242414	0.999466
ENSMUSG00000099398.1	Ms4a14	140.469	0.480293	0.258622	0.999466
ENSMUSG00000049191.12	Rgag4	49.8111	0.479842	0.257124	0.999466
ENSMUSG00000026872.16	Zeb2	1825.9	0.478618	0.15431	0.999466
ENSMUSG00000100658.1	F730311O21Rik	30.1839	0.476216	0.26268	0.999466
ENSMUSG00000097888.1	Gm26682	29.0878	0.476087	0.260372	0.999466
ENSMUSG00000097194.1	9330175E14Rik	35.373	0.475343	0.236771	0.999466
ENSMUSG00000073733.4	Rsg1	49.89	0.475334	0.13618	0.999466
ENSMUSG00000033213.16	AA467197	338.323	0.475263	0.242828	0.999466
ENSMUSG00000097380.1	Gm26816	93.7743	0.47505	0.0568271	0.999466
ENSMUSG00000106706.1	C530043K16Rik	544.575	0.47299	0.0318918	0.999466
ENSMUSG00000089687.2	Rab42	33.7452	0.472944	0.180632	0.999466
ENSMUSG00000103614.1	Gm37949	124.018	0.471755	0.161396	0.999466
ENSMUSG00000040483.15	Xaf1	641.271	0.470571	0.144127	0.999466
ENSMUSG00000025498.14	Irf7	2482.62	0.469394	0.117896	0.999466
ENSMUSG00000025930.6	Msc	60.0761	0.469386	0.254707	0.999466
ENSMUSG00000030077.11	Chl1	639.784	0.468702	0.201277	0.999466
ENSMUSG00000010142.12	Tnfrsf13b	112.584	0.468588	0.269528	0.999466
ENSMUSG00000057606.14	Colq	56.1848	0.468254	0.199223	0.999466
ENSMUSG00000074736.10	Syndig1	29.7861	0.466613	0.214064	0.999466
ENSMUSG00000020176.17	Grb10	2607.7	0.465972	0.211879	0.999466
ENSMUSG00000097855.7	A930007I19Rik	64.7925	0.464508	0.269025	0.999466
ENSMUSG00000104835.4	Gm5547	31.8204	0.464278	0.271156	0.999466
ENSMUSG00000028076.12	Cd1d1	106.833	0.46314	0.217453	0.999466
ENSMUSG00000090213.1	Tmem189	306.826	0.463032	0.221111	0.999466
ENSMUSG00000103195.1	Gm37644	27.5667	0.462862	0.243099	0.999466
ENSMUSG00000056476.13	Med12l	34.6513	0.462183	0.172341	0.999466
ENSMUSG00000089929.1	Bcl2a1b	83.5402	0.461534	0.220138	0.999466
ENSMUSG00000057137.9	Tmem140	160.388	0.460688	0.179228	0.999466
ENSMUSG00000060032.6	H2afj	63.7931	0.460359	0.136344	0.999466
ENSMUSG00000103772.1	Gm36933	87.1489	0.459783	0.2455	0.999466
ENSMUSG00000031608.13	Galnt7	342.357	0.45833	0.231086	0.999466
ENSMUSG00000022408.6	Fam83f	43.591	0.456775	0.28122	0.999466
ENSMUSG00000071722.4	Spin4	126.736	0.456022	0.258836	0.999466
ENSMUSG00000019990.14	Pde7b	105.476	0.455401	0.188726	0.999466
ENSMUSG00000079625.2	Tm4sf19	40.076	0.45476	0.281992	0.999466
ENSMUSG00000054293.10	A630033H20Rik	247.809	0.454624	0.257796	0.999466
ENSMUSG00000051832.7	E230016K23Rik	33.8607	0.45311	0.284201	0.999466
ENSMUSG00000057135.12	Scimp	103.593	0.451088	0.288206	0.999466
ENSMUSG00000092526.1	Gm17907	44.8328	0.450552	0.157909	0.999466
ENSMUSG00000037759.5	Ptger2	77.0026	0.447793	0.282187	0.999466
ENSMUSG00000054115.11	Skp2	167.851	0.447466	0.062668	0.999466
ENSMUSG00000049932.3	H2afx	36.2671	0.447103	0.23892	0.999466
ENSMUSG00000038910.6	Plcl2	56.6936	0.446986	0.231595	0.999466
ENSMUSG00000017652.16	Cd40	267.612	0.444611	0.29277	0.999466
ENSMUSG00000042208.15	0610010F05Rik	155.677	0.4446	0.0996634	0.999466
ENSMUSG00000022236.9	Ropn1l	38.3801	0.444207	0.226755	0.999466
ENSMUSG00000074482.4	Gm16589	42.5531	0.443871	0.225053	0.999466
ENSMUSG00000092014.1	Gm4468	27.8729	0.443747	0.285912	0.999466
ENSMUSG00000022439.9	Parvg	439.87	0.442278	0.296559	0.999466
ENSMUSG00000059089.4	Fcgr4	319.823	0.441903	0.297579	0.999466
ENSMUSG00000024600.8	Slc27a6	41.448	0.441717	0.288452	0.999466
ENSMUSG00000043099.4	Hic1	115.447	0.440827	0.270669	0.999466
ENSMUSG00000061175.11	Fnip2	265.263	0.440699	0.264168	0.999466
ENSMUSG00000042106.5	Fam212a	174.97	0.440543	0.17865	0.999466
ENSMUSG00000051606.4	2010001K21Rik	33.9215	0.439796	0.186335	0.999466
ENSMUSG00000022126.6	Acod1	613.702	0.439715	0.294934	0.999466
ENSMUSG00000023982.7	Guca1a	125.275	0.439332	0.259804	0.999466
ENSMUSG00000075574.2	Defb48	83.6145	0.439269	0.299333	0.999466
ENSMUSG00000000275.16	Trim25	726.883	0.438688	0.203694	0.999466
ENSMUSG00000071723.7	Gspt2	54.8871	0.438514	0.246572	0.999466
ENSMUSG00000025402.12	Nab2	149.592	0.438423	0.118503	0.999466
ENSMUSG00000026228.6	Htr2b	211.771	0.438172	0.302562	0.999466
ENSMUSG00000044092.8	C130050O18Rik	97.1077	0.437973	0.302081	0.999466
ENSMUSG00000075408.5	6030408B16Rik	284.309	0.437565	0.270304	0.999466
ENSMUSG00000040260.7	Daam2	104.58	0.436569	0.215086	0.999466
ENSMUSG00000035992.15	Fnip1	653.279	0.436211	0.109186	0.999466
ENSMUSG00000071068.6	Treml2	45.7182	0.435543	0.28287	0.999466
ENSMUSG00000026358.13	Rgs1	2406.12	0.435233	0.207047	0.999466
ENSMUSG00000026207.16	Speg	61.0419	0.435208	0.127474	0.999466
ENSMUSG00000021057.15	Akap5	29.3227	0.43503	0.297851	0.999466
ENSMUSG00000035004.2	Igsf6	1376.43	0.433381	0.300751	0.999466
ENSMUSG00000021640.5	Naip1	31.7483	0.433364	0.28414	0.999466
ENSMUSG00000051984.13	Sec31b	35.5611	0.433272	0.259199	0.999466
ENSMUSG00000039910.9	Cited2	197.942	0.433046	0.181627	0.999466
ENSMUSG00000063506.13	Arhgap22	61.9013	0.432977	0.150559	0.999466
ENSMUSG00000069830.10	Nlrp1a	29.7097	0.432586	0.301883	0.999466
ENSMUSG00000040033.15	Stat2	1380.91	0.432514	0.197305	0.999466
ENSMUSG00000000673.8	Haao	56.1016	0.432108	0.307033	0.999466
ENSMUSG00000038580.12	Sct	80.9296	0.431786	0.303116	0.999466
ENSMUSG00000103931.1	Gm36962	38.7305	0.431232	0.294633	0.999466
ENSMUSG00000031227.8	Magee1	272.519	0.431186	0.283618	0.999466
ENSMUSG00000105504.4	Gbp5	77.2132	0.431043	0.25614	0.999466
ENSMUSG00000097388.1	Gm3200	41.7421	0.430631	0.182669	0.999466
ENSMUSG00000060044.7	Tmem26	128.552	0.430424	0.276462	0.999466
ENSMUSG00000062082.16	Cd200r4	194.668	0.429893	0.307107	0.999466
ENSMUSG00000030144.4	Clec4d	677.111	0.429825	0.297221	0.999466
ENSMUSG00000079419.4	Ms4a6c	393.142	0.42949	0.301642	0.999466
ENSMUSG00000034248.7	Slc25a37	455.584	0.429376	0.267816	0.999466
ENSMUSG00000069171.13	Nr2f1	33.6362	0.428027	0.289136	0.999466
ENSMUSG00000024079.4	Eif2ak2	775.222	0.427832	0.071219	0.999466
ENSMUSG00000058163.13	Gm5431	46.612	0.427	0.314481	0.999466
ENSMUSG00000099757.1	BE692007	55.9909	0.426405	0.311524	0.999466
ENSMUSG00000031165.6	Was	40.2334	0.426	0.314065	0.999466
ENSMUSG00000106229.1	Gm19409	52.4626	0.425814	0.125572	0.999466
ENSMUSG00000060771.14	Tsga10	137.885	0.424945	0.23244	0.999466
ENSMUSG00000051506.16	Wdfy4	138.266	0.424557	0.317804	0.999466
ENSMUSG00000072244.9	Trim6	28.5586	0.424532	0.281687	0.999466
ENSMUSG00000074671.6	Tspyl3	141.053	0.42432	0.26555	0.999466
ENSMUSG00000039789.7	Zfp597	121.642	0.424303	0.0472166	0.999466
ENSMUSG00000029490.3	Mfsd7a	324.321	0.42408	0.191027	0.999466
ENSMUSG00000030417.15	Pdcd5	128.232	0.423657	0.112844	0.999466
ENSMUSG00000041390.18	Mdfic	361.638	0.423406	0.234592	0.999466
ENSMUSG00000078185.2	Chml	32.5924	0.42123	0.211423	0.999466
ENSMUSG00000017132.17	Cyth1	320.342	0.4205	0.207604	0.999466
ENSMUSG00000070476.10	Fam217b	68.4673	0.419238	0.196526	0.999466
ENSMUSG00000091405.2	Hist2h4	26.5626	0.418028	0.311916	0.999466
ENSMUSG00000040552.8	C3ar1	2551.25	0.417656	0.290976	0.999466
ENSMUSG00000035367.8	Rmi1	76.7975	0.417391	0.202209	0.999466
ENSMUSG00000038963.15	Slco4a1	82.7269	0.417276	0.326156	0.999466
ENSMUSG00000036430.7	Tbcc	31.7957	0.416514	0.252003	0.999466
ENSMUSG00000027533.10	Fabp5	221.636	0.414831	0.315251	0.999466
ENSMUSG00000102602.1	A930004J17Rik	64.9267	0.41388	0.114106	0.999466
ENSMUSG00000029780.14	Nt5c3	319.454	0.413295	0.143201	0.999466
ENSMUSG00000107865.1	Gm44417	51.9894	0.41261	0.317498	0.999466
ENSMUSG00000040613.14	Apobec1	934.911	0.411954	0.274091	0.999466
ENSMUSG00000048647.9	Exd1	33.3584	0.411715	0.2584	0.999466
ENSMUSG00000035208.15	Slfn8	440.37	0.411029	0.269118	0.999466
ENSMUSG00000047786.12	Lix1	41.4498	0.410575	0.303127	0.999466
ENSMUSG00000087201.1	Gm15261	186.636	0.410281	0.323256	0.999466
ENSMUSG00000086725.1	A630052C17Rik	60.0116	0.409872	0.213147	0.999466
ENSMUSG00000087128.7	Gm12655	46.1958	0.408965	0.321352	0.999466
ENSMUSG00000085761.1	4930455G09Rik	54.6031	0.408934	0.332512	0.999466
ENSMUSG00000029915.14	Clec5a	771.375	0.408639	0.335838	0.999466
ENSMUSG00000023571.4	C1qtnf12	61.056	0.407624	0.278723	0.999466
ENSMUSG00000024679.10	Ms4a6d	999.412	0.406816	0.324672	0.999466
ENSMUSG00000091764.3	Zfp964	44.9442	0.406674	0.267501	0.999466
ENSMUSG00000024677.13	Ms4a6b	362.603	0.406177	0.338778	0.999466
ENSMUSG00000034855.13	Cxcl10	711.56	0.406122	0.257503	0.999466
ENSMUSG00000044145.2	1810024B03Rik	54.0877	0.405634	0.254208	0.999466
ENSMUSG00000026893.4	Gca	173.957	0.405509	0.173528	0.999466
ENSMUSG00000059022.14	Kcp	184.623	0.405444	0.322206	0.999466
ENSMUSG00000056031.13	9330154J02Rik	43.386	0.405406	0.313862	0.999466
ENSMUSG00000015314.10	Slamf6	104.838	0.405178	0.339388	0.999466
ENSMUSG00000053746.8	Ptrh1	87.1509	0.404841	0.0872608	0.999466
ENSMUSG00000028226.15	Mmp16	28.7491	0.404837	0.331769	0.999466
ENSMUSG00000086399.1	Gm16144	72.0579	0.404705	0.273236	0.999466
ENSMUSG00000090799.1	Klhl33	47.1493	0.4046	0.329507	0.999466
ENSMUSG00000030187.15	Klra2	291.818	0.404212	0.340987	0.999466
ENSMUSG00000041617.10	Ccdc74a	64.734	0.403162	0.334076	0.999466
ENSMUSG00000055805.14	Fmnl1	151.465	0.4029	0.27405	0.999466
ENSMUSG00000074622.4	Mafb	711.717	0.402797	0.21661	0.999466
ENSMUSG00000043004.13	Gng2	388.586	0.40279	0.329798	0.999466
ENSMUSG00000062753.13	AI413582	397.179	0.402704	0.0364313	0.999466
ENSMUSG00000067924.4	Cxx1b	51.2148	0.402526	0.147996	0.999466
ENSMUSG00000098912.7	1500004A13Rik	37.6115	0.402495	0.274075	0.999466
ENSMUSG00000025013.14	Tll2	72.4496	0.401786	0.334977	0.999466
ENSMUSG00000063524.13	Eno1	1079.72	0.40156	0.240404	0.999466
ENSMUSG00000074785.4	Plxnc1	101.318	0.401033	0.332372	0.999466
ENSMUSG00000025877.14	Hk3	602.542	0.400675	0.345988	0.999466
ENSMUSG00000025915.14	Sgk3	247.617	0.400269	0.258257	0.999466
ENSMUSG00000025489.4	Ifitm5	40.1249	0.40023	0.199859	0.999466
ENSMUSG00000026707.15	Nsun6	217.867	0.400121	0.0424971	0.999466
ENSMUSG00000023341.14	Mx2	150.977	0.399999	0.312643	0.999466
ENSMUSG00000024730.7	Ms4a8a	51.4802	0.399442	0.346438	0.999466
ENSMUSG00000021831.8	Ero1l	372.95	0.399339	0.310482	0.999466
ENSMUSG00000000730.13	Dnmt3l	116.423	0.398489	0.28813	0.999466
ENSMUSG00000024696.8	Lpxn	502.541	0.398265	0.337827	0.999466
ENSMUSG00000045509.5	Gpr150	26.1705	0.397438	0.347981	0.999466
ENSMUSG00000054150.11	Syne3	67.8649	0.3971	0.302921	0.999466
ENSMUSG00000033486.14	Catsper2	48.7653	0.396994	0.280907	0.999466
ENSMUSG00000026548.4	Slamf9	504.185	0.396991	0.342416	0.999466
ENSMUSG00000038181.16	Chpf2	605.531	0.396925	0.138705	0.999466
ENSMUSG00000036442.7	Thap11	98.3062	0.396274	0.164834	0.999466
ENSMUSG00000081723.1	Gm15931	59.8779	0.396138	0.343058	0.999466
ENSMUSG00000029919.5	Hpgds	407.532	0.39613	0.349509	0.999466
ENSMUSG00000050212.4	Eva1b	132.197	0.395459	0.229449	0.999466
ENSMUSG00000049565.16	Aknad1	61.131	0.395403	0.35236	0.999466
ENSMUSG00000038543.13	BC028528	236.033	0.395084	0.261682	0.999466
ENSMUSG00000028893.8	Sesn2	132.743	0.394152	0.218875	0.999466
ENSMUSG00000038179.13	Slamf7	665.889	0.393723	0.349369	0.999466
ENSMUSG00000041538.15	H2-Ob	47.8486	0.39335	0.354209	0.999466
ENSMUSG00000026469.14	Xpr1	290.036	0.392649	0.0812313	0.999466
ENSMUSG00000043421.8	Hilpda	1157.52	0.392621	0.164849	0.999466
ENSMUSG00000085498.1	Gm14023	136.068	0.392513	0.355904	0.999466
ENSMUSG00000025058.4	5430427O19Rik	158.11	0.392165	0.35016	0.999466
ENSMUSG00000055305.15	Zfp93	65.8822	0.392087	0.215241	0.999466
ENSMUSG00000043740.14	B430306N03Rik	366.288	0.39187	0.356668	0.999466
ENSMUSG00000105954.1	Gm42793	224.474	0.390899	0.357102	0.999466
ENSMUSG00000097353.1	A430046D13Rik	46.4871	0.390856	0.218103	0.999466
ENSMUSG00000046516.10	Cox17	194.95	0.390775	0.129691	0.999466
ENSMUSG00000085058.2	8030453O22Rik	30.1279	0.390571	0.303374	0.999466
ENSMUSG00000033355.5	Rtp4	1140.84	0.389593	0.140578	0.999466
ENSMUSG00000062593.15	Lilrb4a	1329.56	0.38956	0.208204	0.999466
ENSMUSG00000003948.16	Mmd	277.077	0.389039	0.322424	0.999466
ENSMUSG00000038028.9	Tigar	86.3362	0.388821	0.164369	0.999466
ENSMUSG00000041268.16	Dmxl2	169.255	0.38864	0.322828	0.999466
ENSMUSG00000047033.2	Pcdhb15	26.9687	0.388328	0.356149	0.999466
ENSMUSG00000037594.10	BC022687	34.3487	0.388007	0.323396	0.999466
ENSMUSG00000079227.9	Ccr5	847.562	0.387832	0.361145	0.999466
ENSMUSG00000011382.6	Dhdh	308.49	0.38765	0.250917	0.999466
ENSMUSG00000026600.12	Soat1	2819.78	0.386367	0.270408	0.999466
ENSMUSG00000029163.9	Emilin1	845.654	0.386059	0.287927	0.999466
ENSMUSG00000025586.16	Cpeb1	296.681	0.385778	0.333759	0.999466
ENSMUSG00000039934.12	Gsap	615.058	0.38555	0.362622	0.999466
ENSMUSG00000045538.6	Ddx28	74.1713	0.385483	0.328641	0.999466
ENSMUSG00000031200.16	Mtcp1	65.561	0.38497	0.256866	0.999466
ENSMUSG00000050914.15	Ankrd37	452.838	0.384774	0.307057	0.999466
ENSMUSG00000029553.10	Tfec	80.7643	0.384476	0.365093	0.999466
ENSMUSG00000020491.15	2810021J22Rik	146.455	0.384432	0.232165	0.999466
ENSMUSG00000071866.11	Ppia	25.2686	0.384346	0.298273	0.999466
ENSMUSG00000050345.8	4930486L24Rik	96.745	0.383631	0.335131	0.999466
ENSMUSG00000039081.9	Zfp503	69.2061	0.383403	0.300122	0.999466
ENSMUSG00000026012.2	Cd28	44.0943	0.383082	0.341046	0.999466
ENSMUSG00000026770.5	Il2ra	83.3497	0.383061	0.364528	0.999466
ENSMUSG00000044042.18	Fmn1	396.1	0.382914	0.295648	0.999466
ENSMUSG00000074361.9	C5ar2	126.319	0.38245	0.367104	0.999466
ENSMUSG00000053101.2	Gpr141	129.842	0.382234	0.361315	0.999466
ENSMUSG00000057895.11	Zfp105	54.3638	0.381684	0.322678	0.999466
ENSMUSG00000034974.12	Dapk3	38.1485	0.381421	0.253195	0.999466
ENSMUSG00000041642.18	Kif21b	200.413	0.380839	0.309357	0.999466
ENSMUSG00000102474.1	2610012C04Rik	68.5664	0.380818	0.323501	0.999466
ENSMUSG00000001020.8	S100a4	109.068	0.380742	0.175353	0.999466
ENSMUSG00000027947.11	Il6ra	199.652	0.379295	0.319858	0.999466
ENSMUSG00000035311.16	Gnptab	331.662	0.379191	0.2028	0.999466
ENSMUSG00000035692.6	Isg15	705.253	0.378735	0.0928716	0.999466
ENSMUSG00000078452.10	Raet1d	106.763	0.378408	0.274347	0.999466
ENSMUSG00000038811.13	Gngt2	564.97	0.378404	0.196068	0.999466
ENSMUSG00000029016.13	Clcn6	177.927	0.377717	0.0703161	0.999466
ENSMUSG00000028563.16	Tm2d1	45.1195	0.37733	0.181236	0.999466
ENSMUSG00000101389.1	Ms4a4a	475.329	0.376903	0.371649	0.999466
ENSMUSG00000051344.13	Plekhm3	408.125	0.376714	0.288352	0.999466
ENSMUSG00000083289.1	Gm8812	55.6618	0.376537	0.23682	0.999466
ENSMUSG00000040751.12	Lat2	488.578	0.375984	0.369726	0.999466
ENSMUSG00000082729.3	Gm14845	33.6759	0.375418	0.284881	0.999466
ENSMUSG00000070323.11	Mmp27	583.32	0.375269	0.373103	0.999466
ENSMUSG00000025779.10	Ly96	216.957	0.375056	0.142433	0.999466
ENSMUSG00000053192.9	Mllt11	311.972	0.374349	0.160681	0.999466
ENSMUSG00000095788.6	Sirpb1a	92.5875	0.37397	0.377552	0.999466
ENSMUSG00000021822.2	Plau	1378.78	0.373664	0.253442	0.999466
ENSMUSG00000026121.13	Sema4c	226.899	0.373388	0.0810891	0.999466
ENSMUSG00000040631.7	Dok4	93.571	0.373188	0.311576	0.999466
ENSMUSG00000050967.5	Creg2	35.114	0.372412	0.380677	0.999466
ENSMUSG00000027896.15	Slc16a4	26.3674	0.372047	0.240546	0.999466
ENSMUSG00000022844.7	Pdia5	721.733	0.371917	0.182837	0.999466
ENSMUSG00000020189.13	Osbpl8	443.979	0.371855	0.23898	0.999466
ENSMUSG00000044952.5	Kctd21	211.992	0.371831	0.231194	0.999466
ENSMUSG00000028974.13	Dffa	363.866	0.370731	0.0639133	0.999466
ENSMUSG00000057143.14	Trim12c	160.394	0.370141	0.236595	0.999466
ENSMUSG00000073274.4	Gm14636	63.8388	0.369644	0.383059	0.999466
ENSMUSG00000061451.13	Tmem151a	25.367	0.36922	0.355332	0.999466
ENSMUSG00000056947.5	Mab21l1	165.466	0.368679	0.364101	0.999466
ENSMUSG00000045312.11	Lhfpl2	2116.75	0.368554	0.271359	0.999466
ENSMUSG00000025876.15	Unc5a	89.0934	0.368378	0.37132	0.999466
ENSMUSG00000065126.1	Snord104	55.8719	0.368274	0.298549	0.999466
ENSMUSG00000037860.15	Aim2	120.281	0.368179	0.383024	0.999466
ENSMUSG00000097415.2	AU020206	428.664	0.366953	0.345434	0.999466
ENSMUSG00000026956.15	Uap1l1	214.519	0.366936	0.246134	0.999466
ENSMUSG00000094441.1	Zfp955a	66.1995	0.36672	0.223583	0.999466
ENSMUSG00000045374.18	Wdr81	320.134	0.366496	0.13695	0.999466
ENSMUSG00000026239.14	Pde6d	121.603	0.365316	0.183869	0.999466
ENSMUSG00000028970.9	Abcb1b	56.5714	0.365098	0.358663	0.999466
ENSMUSG00000050270.12	Tmem220	101.177	0.365002	0.360784	0.999466
ENSMUSG00000051451.5	Crebzf	94.557	0.364894	0.135678	0.999466
ENSMUSG00000039699.13	Batf2	144.865	0.364802	0.331331	0.999466
ENSMUSG00000073775.4	Kti12	43.0753	0.364221	0.238058	0.999466
ENSMUSG00000030443.16	Zfp583	59.0953	0.364052	0.382944	0.999466
ENSMUSG00000026158.11	Ogfrl1	71.0806	0.363856	0.299788	0.999466
ENSMUSG00000074203.4	G430095P16Rik	26.1919	0.36377	0.389844	0.999466
ENSMUSG00000075514.4	Gm13375	33.5806	0.363519	0.349828	0.999466
ENSMUSG00000094683.1	Ap3m1-ps	134.704	0.363138	0.189334	0.999466
ENSMUSG00000049723.14	Mmp12	2575.53	0.363021	0.292293	0.999466
ENSMUSG00000055435.6	Maf	1072.77	0.362542	0.0846273	0.999466
ENSMUSG00000062319.2	Gm10115	40.7053	0.362241	0.394215	0.999466
ENSMUSG00000057335.11	Cep170	1025.36	0.361749	0.213251	0.999466
ENSMUSG00000087107.7	AI662270	265.998	0.36174	0.393045	0.999466
ENSMUSG00000093402.1	Gm18588	126.754	0.361523	0.154209	0.999466
ENSMUSG00000101800.1	Rnf170-ps	36.7549	0.361277	0.306652	0.999466
ENSMUSG00000028631.7	Kcnq4	51.2329	0.360901	0.393242	0.999466
ENSMUSG00000037280.12	Galnt6	422.8	0.36069	0.396028	0.999466
ENSMUSG00000035131.14	Brinp3	48.2173	0.360542	0.395865	0.999466
ENSMUSG00000037499.9	Nenf	128.626	0.360364	0.164492	0.999466
ENSMUSG00000087480.1	Gm15910	28.0696	0.359943	0.305439	0.999466
ENSMUSG00000044268.4	Gm4895	84.6336	0.359941	0.19394	0.999466
ENSMUSG00000029816.10	Gpnmb	3689.45	0.359724	0.253481	0.999466
ENSMUSG00000052760.15	A630001G21Rik	85.8252	0.359035	0.394618	0.999466
ENSMUSG00000078771.10	Evi2a	596.819	0.358689	0.296424	0.999466
ENSMUSG00000028459.11	Cd72	736.791	0.358612	0.390575	0.999466
ENSMUSG00000060216.15	Arrb2	309.137	0.358556	0.396065	0.999466
ENSMUSG00000086782.2	E130102H24Rik	72.7484	0.358268	0.359786	0.999466
ENSMUSG00000024937.14	Ehbp1l1	706.993	0.35812	0.283195	0.999466
ENSMUSG00000095115.1	Itpripl2	609.659	0.357816	0.277818	0.999466
ENSMUSG00000038539.14	Atf5	400.59	0.357136	0.309996	0.999466
ENSMUSG00000039840.7	Epg5	179.914	0.356991	0.217372	0.999466
ENSMUSG00000098050.1	Gm5345	104.359	0.356863	0.395108	0.999466
ENSMUSG00000089788.1	NA	53.1209	0.356858	0.284517	0.999466
ENSMUSG00000022148.15	Fyb	920.017	0.356728	0.396036	0.999466
ENSMUSG00000043870.9	Gm5809	55.8439	0.356389	0.165931	0.999466
ENSMUSG00000028527.18	Ak4	214.209	0.356097	0.366949	0.999466
ENSMUSG00000066682.11	Pilrb2	138.498	0.355916	0.353335	0.999466
ENSMUSG00000068245.14	Phf11d	666.773	0.355497	0.295881	0.999466
ENSMUSG00000040713.12	Creg1	584.726	0.35466	0.311594	0.999466
ENSMUSG00000086679.2	Gm15551	107.664	0.354168	0.39139	0.999466
ENSMUSG00000071203.6	Naip5	67.6073	0.354167	0.403236	0.999466
ENSMUSG00000023143.10	Nagpa	131.357	0.353544	0.205045	0.999466
ENSMUSG00000097839.1	Gm26909	72.4798	0.35307	0.244052	0.999466
ENSMUSG00000031486.14	Adgra2	287.131	0.352828	0.324599	0.999466
ENSMUSG00000026979.16	Psd4	396.421	0.352372	0.406912	0.999466
ENSMUSG00000057596.13	Trim30d	508.581	0.352155	0.35626	0.999466
ENSMUSG00000070883.3	Ccdc173	41.9757	0.351988	0.276083	0.999466
ENSMUSG00000048865.16	Arhgap30	258.964	0.351911	0.407787	0.999466
ENSMUSG00000043939.14	A530064D06Rik	144.011	0.351465	0.407866	0.999466
ENSMUSG00000046245.13	Pilra	814.389	0.351413	0.369437	0.999466
ENSMUSG00000097166.1	9330179D12Rik	32.1542	0.350992	0.408941	0.999466
ENSMUSG00000049969.3	Plekhf2	151.386	0.350982	0.234124	0.999466
ENSMUSG00000029372.7	Ppbp	70.0274	0.350729	0.391894	0.999466
ENSMUSG00000030142.10	Clec4e	1515.2	0.350392	0.400532	0.999466
ENSMUSG00000047810.8	Ccdc88b	49.3556	0.350123	0.406252	0.999466
ENSMUSG00000001034.17	Mapk7	548.419	0.349911	0.128082	0.999466
ENSMUSG00000026786.14	Apbb1ip	812.056	0.349622	0.279704	0.999466
ENSMUSG00000041324.13	Inhba	1207.86	0.349384	0.363069	0.999466
ENSMUSG00000039086.9	Ss18l1	46.9894	0.349315	0.276419	0.999466
ENSMUSG00000090031.2	4732440D04Rik	25.6167	0.349298	0.335851	0.999466
ENSMUSG00000038147.13	Cd84	1297.01	0.34878	0.407198	0.999466
ENSMUSG00000074466.12	Gm15417	126.353	0.348304	0.255084	0.999466
ENSMUSG00000029376.8	Mthfd2l	30.4205	0.34788	0.313658	0.999466
ENSMUSG00000033917.14	Gde1	239.115	0.347604	0.278633	0.999466
ENSMUSG00000047735.14	Samd9l	1065	0.347574	0.237956	0.999466
ENSMUSG00000078945.10	Naip2	188.592	0.347458	0.41312	0.999466
ENSMUSG00000014837.14	4931428F04Rik	73.0214	0.347304	0.229336	0.999466
ENSMUSG00000040007.8	Bahd1	88.2645	0.347262	0.148036	0.999466
ENSMUSG00000052821.3	Cysltr1	286.765	0.347138	0.413942	0.999466
ENSMUSG00000027905.15	Ddx20	85.7819	0.347079	0.186392	0.999466
ENSMUSG00000075592.9	Nynrin	84.7742	0.34693	0.343974	0.999466
ENSMUSG00000052776.10	Oas1a	399.282	0.346384	0.271918	0.999466
ENSMUSG00000041920.14	Slc16a6	308.71	0.34609	0.397593	0.999466
ENSMUSG00000053687.14	Dpep2	1151.67	0.346062	0.415592	0.999466
ENSMUSG00000028795.15	Ccdc28b	439.771	0.346053	0.274246	0.999466
ENSMUSG00000022822.15	Abcc5	1278.81	0.345864	0.298743	0.999466
ENSMUSG00000097567.1	Gm26637	25.1398	0.345858	0.398501	0.999466
ENSMUSG00000024986.11	Hhex	59.3718	0.344957	0.417167	0.999466
ENSMUSG00000028751.13	Pla2g2e	54.8501	0.344909	0.412221	0.999466
ENSMUSG00000031609.3	Sap30	55.7845	0.344889	0.41192	0.999466
ENSMUSG00000087141.1	Plcxd2	99.766	0.344866	0.343888	0.999466
ENSMUSG00000030206.13	Gsg1	29.9894	0.344831	0.362244	0.999466
ENSMUSG00000009292.17	Trpm2	117.538	0.344542	0.400919	0.999466
ENSMUSG00000022246.13	Rai14	1250.19	0.343714	0.331722	0.999466
ENSMUSG00000027399.1	Il1a	890.036	0.342946	0.413137	0.999466
ENSMUSG00000040026.7	Saa3	567.959	0.342749	0.23948	0.999466
ENSMUSG00000035456.8	Prdm8	56.5381	0.342612	0.408611	0.999466
ENSMUSG00000061086.12	Myl4	46.5604	0.342602	0.195122	0.999466
ENSMUSG00000031337.16	Mtm1	301.056	0.342346	0.298337	0.999466
ENSMUSG00000039873.4	Neurl2	68.2896	0.341965	0.412809	0.999466
ENSMUSG00000091723.1	Gm17366	26.405	0.34188	0.415788	0.999466
ENSMUSG00000051373.5	Plpp7	158.79	0.341681	0.384062	0.999466
ENSMUSG00000101335.1	Gm28229	28.1263	0.341107	0.355962	0.999466
ENSMUSG00000079083.2	Jrkl	111.84	0.340962	0.24779	0.999466
ENSMUSG00000043969.4	Emx2	126.835	0.340938	0.396355	0.999466
ENSMUSG00000029561.17	Oasl2	2301.12	0.340796	0.292921	0.999466
ENSMUSG00000044583.13	Tlr7	179.035	0.340649	0.42297	0.999466
ENSMUSG00000036403.15	Cep135	69.7051	0.340537	0.217761	0.999466
ENSMUSG00000047037.5	Nipa1	57.4392	0.340281	0.338284	0.999466
ENSMUSG00000053040.13	Aph1c	126.279	0.340107	0.415197	0.999466
ENSMUSG00000029265.4	Dr1	215.424	0.340034	0.284351	0.999466
ENSMUSG00000062284.4	Gm6030	25.0361	0.340009	0.293036	0.999466
ENSMUSG00000052749.8	Trim30b	29.5953	0.33986	0.42215	0.999466
ENSMUSG00000031497.8	Tnfsf13b	302.118	0.339406	0.37744	0.999466
ENSMUSG00000034110.8	Kctd7	198.737	0.339276	0.192382	0.999466
ENSMUSG00000018507.16	Trpv2	627.96	0.339237	0.408565	0.999466
ENSMUSG00000093384.1	Gm20689	79.7649	0.33913	0.360713	0.999466
ENSMUSG00000033777.3	Tlr13	475.844	0.339042	0.425178	0.999466
ENSMUSG00000039621.13	Prex1	225.59	0.338912	0.399354	0.999466
ENSMUSG00000027833.16	Shox2	223.944	0.338599	0.42371	0.999466
ENSMUSG00000033857.12	Engase	147.693	0.338303	0.327156	0.999466
ENSMUSG00000025804.4	Ccr1	1460.59	0.338257	0.417655	0.999466
ENSMUSG00000030427.17	Lilra6	30.3401	0.33824	0.419018	0.999466
ENSMUSG00000070873.5	Lilra5	162.468	0.337861	0.426759	0.999466
ENSMUSG00000037624.15	Kcnk2	72.1011	0.337838	0.423472	0.999466
ENSMUSG00000079523.8	Tmsb10	332.376	0.337517	0.188341	0.999466
ENSMUSG00000078942.10	Naip6	43.2309	0.336977	0.427974	0.999466
ENSMUSG00000019718.8	L3hypdh	301.228	0.33696	0.398855	0.999466
ENSMUSG00000029204.7	Rhoh	159.14	0.336892	0.427517	0.999466
ENSMUSG00000032633.12	Flcn	941.042	0.336388	0.0774755	0.999466
ENSMUSG00000056069.8	Fam105a	200.82	0.336322	0.428039	0.999466
ENSMUSG00000028028.11	Alpk1	106.134	0.336059	0.36008	0.999466
ENSMUSG00000023274.14	Cd4	87.4346	0.335577	0.429947	0.999466
ENSMUSG00000048677.8	Tpcn2	800.089	0.33525	0.22506	0.999466
ENSMUSG00000092171.1	4833427F10Rik	25.4121	0.335175	0.430089	0.999466
ENSMUSG00000024076.9	Vit	432.073	0.335136	0.420108	0.999466
ENSMUSG00000019726.10	Lyst	355.38	0.334888	0.24318	0.999466
ENSMUSG00000023845.6	Lnpep	238.097	0.334779	0.18898	0.999466
ENSMUSG00000069910.2	Spdl1	125.072	0.334542	0.374212	0.999466
ENSMUSG00000040327.16	Cul9	214.497	0.334408	0.207342	0.999466
ENSMUSG00000024302.15	Dtna	140.861	0.334089	0.393812	0.999466
ENSMUSG00000005267.13	Zfp287	66.1671	0.333945	0.376566	0.999466
ENSMUSG00000039208.15	Metrnl	570.105	0.333789	0.342861	0.999466
ENSMUSG00000043795.8	Prr33	82.0399	0.333502	0.42302	0.999466
ENSMUSG00000032281.11	Acsbg1	86.442	0.333451	0.371495	0.999466
ENSMUSG00000034652.12	Cd300a	302.441	0.333236	0.431671	0.999466
ENSMUSG00000021464.14	Ror2	132.349	0.333007	0.322941	0.999466
ENSMUSG00000026771.14	Spopl	130.064	0.332733	0.300819	0.999466
ENSMUSG00000047419.5	Cmya5	63.6508	0.33271	0.392654	0.999466
ENSMUSG00000004698.9	Hdac9	79.0136	0.332326	0.430445	0.999466
ENSMUSG00000051735.6	Rinl	97.3921	0.331739	0.422372	0.999466
ENSMUSG00000041995.7	Zbed3	44.0654	0.331268	0.291923	0.999466
ENSMUSG00000021203.15	Otub2	63.7926	0.330675	0.420776	0.999466
ENSMUSG00000029819.6	Npy	868.142	0.330331	0.281391	0.999466
ENSMUSG00000079414.2	Gm11110	101.328	0.330251	0.298712	0.999466
ENSMUSG00000028849.17	Map7d1	348.772	0.330158	0.212939	0.999466
ENSMUSG00000022765.8	Snap29	488.121	0.330134	0.027868	0.999466
ENSMUSG00000091811.1	Inafm1	44.2648	0.329871	0.352139	0.999466
ENSMUSG00000027959.13	Sass6	110.171	0.329862	0.390617	0.999466
ENSMUSG00000030530.15	Furin	1083.92	0.329779	0.293934	0.999466
ENSMUSG00000034422.14	Parp14	417.634	0.329661	0.257896	0.999466
ENSMUSG00000003484.4	Cyp4f18	851.186	0.329212	0.429333	0.999466
ENSMUSG00000042331.13	Specc1	309.238	0.329114	0.43145	0.999466
ENSMUSG00000024990.12	Rbp4	63.0726	0.329029	0.411473	0.999466
ENSMUSG00000029798.11	Herc6	213.254	0.328997	0.379304	0.999466
ENSMUSG00000021322.7	Aoah	523.564	0.328881	0.439112	0.999466
ENSMUSG00000036469.16	March1	217.894	0.328823	0.437953	0.999466
ENSMUSG00000020108.3	Ddit4	290.182	0.328813	0.435769	0.999466
ENSMUSG00000031662.7	Snx20	27.153	0.328511	0.436611	0.999466
ENSMUSG00000038508.7	Gdf15	37.5451	0.328401	0.418132	0.999466
ENSMUSG00000036943.8	Rab8b	2219.74	0.328349	0.350157	0.999466
ENSMUSG00000062232.14	Rapgef2	283.161	0.328315	0.29604	0.999466
ENSMUSG00000042302.14	Ehbp1	234.897	0.328273	0.408909	0.999466
ENSMUSG00000022639.14	Dubr	691.818	0.327993	0.3644	0.999466
ENSMUSG00000049517.7	Rps23	57.9002	0.327898	0.255328	0.999466
ENSMUSG00000020901.13	Pik3r5	347.417	0.327808	0.438411	0.999466
ENSMUSG00000032766.9	Gng11	696.343	0.32763	0.343235	0.999466
ENSMUSG00000044345.9	Marveld1	359.117	0.327618	0.4003	0.999466
ENSMUSG00000003283.13	Hck	481.223	0.327487	0.441142	0.999466
ENSMUSG00000032420.7	Nt5e	1386.84	0.327458	0.428982	0.999466
ENSMUSG00000032565.8	Nudt16	87.1698	0.327376	0.396382	0.999466
ENSMUSG00000051444.9	Bbs12	125.718	0.326798	0.321591	0.999466
ENSMUSG00000040003.17	Magi2	57.7352	0.326541	0.401761	0.999466
ENSMUSG00000048450.10	Msx1	163.372	0.326329	0.420864	0.999466
ENSMUSG00000106212.1	Gm43112	98.3998	0.325881	0.423896	0.999466
ENSMUSG00000028329.13	Xpa	63.2294	0.325835	0.242191	0.999466
ENSMUSG00000052371.5	Hoxd3os1	55.484	0.325645	0.333335	0.999466
ENSMUSG00000020785.17	Camkk1	262.183	0.325362	0.240586	0.999466
ENSMUSG00000015745.9	Plekho1	355.28	0.325236	0.403254	0.999466
ENSMUSG00000044350.14	Lacc1	210.506	0.325007	0.291889	0.999466
ENSMUSG00000105748.1	Gm43088	30.8524	0.324804	0.331076	0.999466
ENSMUSG00000033033.10	Calhm2	576.62	0.324692	0.351443	0.999466
ENSMUSG00000107002.1	0610012G03Rik	36.2853	0.324639	0.37688	0.999466
ENSMUSG00000036138.16	Acaa1a	136.199	0.324611	0.163582	0.999466
ENSMUSG00000040061.17	Plcb2	45.3028	0.324461	0.435329	0.999466
ENSMUSG00000028011.16	Tdo2	515.039	0.324246	0.445222	0.999466
ENSMUSG00000071714.5	Csf2rb2	788.731	0.324218	0.421801	0.999466
ENSMUSG00000035967.15	Ints6l	175.674	0.324201	0.351788	0.999466
ENSMUSG00000039501.14	Znfx1	813.283	0.324144	0.336806	0.999466
ENSMUSG00000024691.13	Fam111a	807.914	0.324065	0.330647	0.999466
ENSMUSG00000019194.14	Scn1b	78.6992	0.323793	0.406723	0.999466
ENSMUSG00000025940.6	Tmem70	92.0034	0.323758	0.222599	0.999466
ENSMUSG00000019558.14	Slc6a8	677.967	0.323633	0.278963	0.999466
ENSMUSG00000030786.18	Itgam	623.412	0.323467	0.444985	0.999466
ENSMUSG00000032122.14	Slc37a2	611.534	0.323398	0.445614	0.999466
ENSMUSG00000027199.14	Gatm	1158.96	0.322971	0.444335	0.999466
ENSMUSG00000056917.12	Sipa1	174.201	0.322927	0.246693	0.999466
ENSMUSG00000032387.14	Rbpms2	36.026	0.322846	0.428692	0.999466
ENSMUSG00000033326.15	Kdm4a	226.743	0.322846	0.203153	0.999466
ENSMUSG00000086507.1	Adap2os	114.224	0.322775	0.446139	0.999466
ENSMUSG00000097277.7	2900076A07Rik	50.2097	0.322701	0.262283	0.999466
ENSMUSG00000017412.15	Cacnb4	89.0479	0.322401	0.448099	0.999466
ENSMUSG00000027009.18	Itga4	134.47	0.322204	0.446954	0.999466
ENSMUSG00000029385.14	Ccng2	377.925	0.3221	0.106027	0.999466
ENSMUSG00000090231.10	Cfb	239.498	0.321673	0.321438	0.999466
ENSMUSG00000079293.11	Clec7a	1578.46	0.321661	0.435224	0.999466
ENSMUSG00000030921.16	Trim30a	1079.12	0.32118	0.31301	0.999466
ENSMUSG00000019878.7	Hsf2	433.984	0.321053	0.162414	0.999466
ENSMUSG00000020709.15	Adap2	459.931	0.32057	0.44458	0.999466
ENSMUSG00000034595.17	Ppp1r18	659.199	0.320493	0.278519	0.999466
ENSMUSG00000074874.9	Ctla2b	198.221	0.32	0.443856	0.999466
ENSMUSG00000023495.12	Pcbp4	205.22	0.319921	0.229701	0.999466
ENSMUSG00000028464.16	Tpm2	769.286	0.319885	0.395793	0.999466
ENSMUSG00000027932.14	Slc27a3	55.0748	0.319592	0.379563	0.999466
ENSMUSG00000000794.9	Kcnn3	79.1828	0.319461	0.452191	0.999466
ENSMUSG00000026390.7	Marco	52.8529	0.319216	0.435811	0.999466
ENSMUSG00000028364.15	Tnc	5801.18	0.319155	0.42531	0.999466
ENSMUSG00000024663.17	Rab3il1	1967.26	0.318694	0.30958	0.999466
ENSMUSG00000042500.11	Ago4	58.7752	0.31846	0.347763	0.999466
ENSMUSG00000059839.8	Zfp874b	117.247	0.318409	0.264491	0.999466
ENSMUSG00000029314.14	Gpat3	144.233	0.318228	0.395219	0.999466
ENSMUSG00000019987.8	Arg1	2150.86	0.317448	0.23658	0.999466
ENSMUSG00000029254.16	Stap1	172.673	0.31695	0.455988	0.999466
ENSMUSG00000041679.8	Lrrc29	44.9677	0.316905	0.419604	0.999466
ENSMUSG00000060519.11	Tor3a	880.469	0.316549	0.344689	0.999466
ENSMUSG00000031367.15	Ap1s2	99.7361	0.316536	0.391363	0.999466
ENSMUSG00000042677.7	Zc3h12a	148.634	0.316069	0.28852	0.999466
ENSMUSG00000097471.7	5830432E09Rik	63.2068	0.316026	0.457069	0.999466
ENSMUSG00000033149.16	Phldb2	924.772	0.316	0.36447	0.999466
ENSMUSG00000044528.5	Tram1l1	33.9156	0.315913	0.457462	0.999466
ENSMUSG00000104291.1	A130071D04Rik	61.6062	0.315658	0.431368	0.999466
ENSMUSG00000042492.12	Tbc1d10b	278.588	0.315461	0.155633	0.999466
ENSMUSG00000040321.3	Zfp770	51.3335	0.314761	0.34091	0.999466
ENSMUSG00000011752.6	Pgam1	52.7014	0.314739	0.246688	0.999466
ENSMUSG00000039209.12	Rpl39l	169.382	0.314734	0.445009	0.999466
ENSMUSG00000029560.12	Snx8	523.432	0.314355	0.326119	0.999466
ENSMUSG00000031444.16	F10	707.712	0.314147	0.459357	0.999466
ENSMUSG00000021624.9	Cd180	134.199	0.313812	0.459739	0.999466
ENSMUSG00000026627.7	Tmem206	417.721	0.313581	0.365673	0.999466
ENSMUSG00000037992.16	Rara	193.921	0.313211	0.212938	0.999466
ENSMUSG00000030047.14	Arhgap25	442.121	0.313172	0.460576	0.999466
ENSMUSG00000023259.16	Slc26a6	244.596	0.313031	0.335086	0.999466
ENSMUSG00000030844.11	Rgs10	620.118	0.313005	0.34551	0.999466
ENSMUSG00000030361.16	Klrb1a	68.7779	0.312985	0.456273	0.999466
ENSMUSG00000056671.6	Prelid2	296.562	0.312567	0.365639	0.999466
ENSMUSG00000090124.7	Ugt1a7c	392.557	0.312434	0.360568	0.999466
ENSMUSG00000042228.14	Lyn	841.608	0.312243	0.440066	0.999466
ENSMUSG00000053158.10	Fes	837.502	0.311709	0.331614	0.999466
ENSMUSG00000067996.5	Bpifb9b	43.6475	0.311599	0.399518	0.999466
ENSMUSG00000034163.10	Zfc3h1	394.668	0.311303	0.03908	0.999466
ENSMUSG00000034593.16	Myo5a	520.768	0.311294	0.427863	0.999466
ENSMUSG00000060441.14	Trim5	60.6802	0.311291	0.391247	0.999466
ENSMUSG00000055407.13	Map6	175.896	0.310427	0.394574	0.999466
ENSMUSG00000108526.1	Gm45828	98.8288	0.310281	0.415575	0.999466
ENSMUSG00000050796.4	B3galt6	51.034	0.310155	0.228769	0.999466
ENSMUSG00000066442.16	Mthfs	48.7829	0.310111	0.41999	0.999466
ENSMUSG00000022103.9	Gfra2	257.398	0.310055	0.43131	0.999466
ENSMUSG00000022488.8	Nckap1l	1217.9	0.3093	0.466929	0.999466
ENSMUSG00000074794.9	Arrdc3	801.831	0.309238	0.345041	0.999466
ENSMUSG00000072620.3	Slfn2	1731.51	0.309139	0.303576	0.999466
ENSMUSG00000024805.15	Pcgf5	157.241	0.308962	0.356303	0.999466
ENSMUSG00000019122.8	Ccl9	1632.2	0.308923	0.442688	0.999466
ENSMUSG00000019880.9	Rspo3	40.5176	0.308692	0.467561	0.999466
ENSMUSG00000097705.1	Gm26740	47.6657	0.308322	0.462903	0.999466
ENSMUSG00000086894.2	Gm15708	149.118	0.308034	0.308408	0.999466
ENSMUSG00000046675.6	Tmem251	284.466	0.308015	0.151139	0.999466
ENSMUSG00000070709.12	Zfp974	119.047	0.307988	0.227431	0.999466
ENSMUSG00000028599.10	Tnfrsf1b	1476.82	0.307728	0.36077	0.999466
ENSMUSG00000026904.17	Slc4a10	35.1122	0.307648	0.464085	0.999466
ENSMUSG00000030956.15	Fam53b	213.611	0.307605	0.149929	0.999466
ENSMUSG00000039485.7	Tspyl4	232.552	0.307348	0.400168	0.999466
ENSMUSG00000030598.15	Fbxo17	31.7768	0.307322	0.419945	0.999466
ENSMUSG00000096225.7	Lhx8	39.5555	0.307089	0.459076	0.999466
ENSMUSG00000082292.3	Gm12250	215.193	0.307055	0.421635	0.999466
ENSMUSG00000027827.16	Kcnab1	43.5029	0.306918	0.280235	0.999466
ENSMUSG00000025473.16	Adam8	2699.04	0.306781	0.459581	0.999466
ENSMUSG00000038679.16	Trps1	253.242	0.306651	0.466089	0.999466
ENSMUSG00000105189.1	Gm7774	78.759	0.306216	0.262952	0.999466
ENSMUSG00000045404.15	Kcnk13	46.1146	0.305997	0.464859	0.999466
ENSMUSG00000053063.11	Clec12a	553.172	0.305975	0.4711	0.999466
ENSMUSG00000069892.9	9930111J21Rik2	148.448	0.305504	0.466325	0.999466
ENSMUSG00000044811.13	Cd300c2	422.598	0.305443	0.468421	0.999466
ENSMUSG00000021504.14	B4galt7	543.141	0.305414	0.224772	0.999466
ENSMUSG00000063458.12	1700112E06Rik	169.936	0.304873	0.398652	0.999466
ENSMUSG00000086712.2	AI427809	1124	0.304656	0.339401	0.999466
ENSMUSG00000097944.1	A130014A01Rik	32.8659	0.304573	0.431347	0.999466
ENSMUSG00000024533.15	Spire1	143.869	0.304424	0.437371	0.999466
ENSMUSG00000031264.13	Btk	276.667	0.30441	0.47035	0.999466
ENSMUSG00000036977.7	Anapc10	438.494	0.303765	0.159167	0.999466
ENSMUSG00000026740.12	Dnajc1	572.832	0.303498	0.303222	0.999466
ENSMUSG00000054752.16	Fsd1l	78.2138	0.30348	0.456127	0.999466
ENSMUSG00000026773.19	Pfkfb3	1115.04	0.303335	0.467952	0.999466
ENSMUSG00000035352.3	Ccl12	621.784	0.303277	0.395022	0.999466
ENSMUSG00000022960.12	Donson	65.2327	0.303078	0.226468	0.999466
ENSMUSG00000070031.11	Sp140	218.189	0.303011	0.347228	0.999466
ENSMUSG00000029471.13	Camkk2	123.683	0.303006	0.284841	0.999466
ENSMUSG00000018381.15	Abi3	85.223	0.302966	0.449891	0.999466
ENSMUSG00000024327.15	Slc39a7	216.726	0.302781	0.177969	0.999466
ENSMUSG00000034173.13	Zbed5	56.1211	0.302704	0.39291	0.999466
ENSMUSG00000009731.4	Kcnd1	321.769	0.302582	0.430456	0.999466
ENSMUSG00000041629.7	Fam104a	121.165	0.30231	0.179244	0.999466
ENSMUSG00000050550.7	Gm11868	41.865	0.302267	0.356874	0.999466
ENSMUSG00000035517.17	Tdrd7	265.066	0.30168	0.217622	0.999466
ENSMUSG00000024059.9	Clip4	574.09	0.301676	0.472731	0.999466
ENSMUSG00000027230.9	Creb3l1	891.966	0.30152	0.434324	0.999466
ENSMUSG00000086567.1	Gm2830	27.8442	0.301486	0.400397	0.999466
ENSMUSG00000105079.1	Gm43715	25.5201	0.30127	0.470029	0.999466
ENSMUSG00000019832.3	Rab32	1654.56	0.300824	0.3637	0.999466
ENSMUSG00000026981.15	Il1rn	2296.13	0.300783	0.42911	0.999466
ENSMUSG00000097075.2	D830044I16Rik	54.2782	0.300411	0.278761	0.999466
ENSMUSG00000053390.15	Zfp952	264.824	0.300336	0.299954	0.999466
ENSMUSG00000099470.1	Gm29340	25.8346	0.300329	0.38949	0.999466
ENSMUSG00000001657.7	Hoxc8	219.577	0.300207	0.46332	0.999466
ENSMUSG00000039313.14	AF529169	47.8099	0.300084	0.477673	0.999466
ENSMUSG00000037001.10	Zfp39	175.112	0.300019	0.28865	0.999466
ENSMUSG00000053338.9	Tarm1	86.6844	0.299107	0.477365	0.999466
ENSMUSG00000032194.8	Kank2	539.261	0.299066	0.407345	0.999466
ENSMUSG00000032593.5	Amigo3	86.1844	0.298743	0.311218	0.999466
ENSMUSG00000045362.7	Tnfrsf26	1155.56	0.298584	0.448169	0.999466
ENSMUSG00000024672.11	Ms4a7	1179.63	0.298371	0.399336	0.999466
ENSMUSG00000060063.9	Alox5ap	560.716	0.298364	0.45322	0.999466
ENSMUSG00000096954.1	Gdap10	297.849	0.298242	0.438219	0.999466
ENSMUSG00000026656.15	Fcgr2b	1441.76	0.298179	0.453496	0.999466
ENSMUSG00000020553.8	Pctp	185.317	0.298045	0.320184	0.999466
ENSMUSG00000013974.2	Mcemp1	263.115	0.298005	0.480662	0.999466
ENSMUSG00000086382.1	Chrna1os	49.4868	0.297977	0.437873	0.999466
ENSMUSG00000023913.17	Pla2g7	1726.43	0.297839	0.428773	0.999466
ENSMUSG00000050533.3	Gm9845	59.4429	0.296915	0.348978	0.999466
ENSMUSG00000026170.6	Cyp27a1	351.205	0.296671	0.388599	0.999466
ENSMUSG00000016984.7	Etaa1	40.9649	0.296647	0.306155	0.999466
ENSMUSG00000004891.16	Nes	235.871	0.296492	0.46688	0.999466
ENSMUSG00000078453.2	Abracl	392.531	0.296037	0.240082	0.999466
ENSMUSG00000059498.13	Fcgr3	1149.11	0.295964	0.433688	0.999466
ENSMUSG00000068196.4	Col8a1	4586.75	0.295754	0.433337	0.999466
ENSMUSG00000019173.11	Rab5c	715.842	0.295676	0.301053	0.999466
ENSMUSG00000061778.10	Mospd2	658.045	0.295608	0.169099	0.999466
ENSMUSG00000060380.2	C030014I23Rik	30.0784	0.295461	0.422504	0.999466
ENSMUSG00000054404.12	Slfn5	2467.17	0.294977	0.423473	0.999466
ENSMUSG00000029674.13	Limk1	147.819	0.294865	0.395376	0.999466
ENSMUSG00000020857.11	Nme2	63.3959	0.294587	0.306805	0.999466
ENSMUSG00000026768.10	Itga8	67.8623	0.294426	0.483556	0.999466
ENSMUSG00000102516.1	Gm38340	37.0628	0.294391	0.486033	0.999466
ENSMUSG00000073412.6	Lst1	122.847	0.294317	0.479839	0.999466
ENSMUSG00000028398.8	Tmem261	439.29	0.294266	0.070423	0.999466
ENSMUSG00000030393.8	Zik1	46.1394	0.294207	0.439564	0.999466
ENSMUSG00000039166.15	Akap7	187.638	0.293716	0.407645	0.999466
ENSMUSG00000103183.1	Gm37090	51.1446	0.293245	0.32545	0.999466
ENSMUSG00000034116.17	Vav1	580.399	0.293068	0.490636	0.999466
ENSMUSG00000064289.15	Tank	1138.33	0.292971	0.289832	0.999466
ENSMUSG00000032400.17	Zwilch	58.2275	0.292933	0.442649	0.999466
ENSMUSG00000020120.15	Plek	2169.96	0.292335	0.48343	0.999466
ENSMUSG00000022947.7	Cbr3	90.3537	0.292273	0.376332	0.999466
ENSMUSG00000058773.2	Hist1h1b	85.724	0.292125	0.491784	0.999466
ENSMUSG00000085721.1	Gm12796	41.4124	0.292054	0.492111	0.999466
ENSMUSG00000031490.5	Eif4ebp1	888.436	0.291869	0.210705	0.999466
ENSMUSG00000090272.7	Mndal	822.482	0.291709	0.444295	0.999466
ENSMUSG00000070427.3	Il18bp	319.034	0.291611	0.321357	0.999466
ENSMUSG00000034040.16	Wbscr17	172.874	0.291558	0.461375	0.999466
ENSMUSG00000037254.18	Itih2	111.271	0.291474	0.487217	0.999466
ENSMUSG00000027340.15	Slc23a2	359.987	0.291351	0.406994	0.999466
ENSMUSG00000029229.8	Chic2	338.889	0.291007	0.119235	0.999466
ENSMUSG00000031760.8	Mt3	474.185	0.290941	0.466137	0.999466
ENSMUSG00000027555.8	Car13	397.939	0.290884	0.415336	0.999466
ENSMUSG00000042770.8	Hebp1	377.789	0.290757	0.379791	0.999466
ENSMUSG00000020300.14	Cpeb4	262.262	0.2906	0.356883	0.999466
ENSMUSG00000046223.10	Plaur	1597.31	0.290256	0.424558	0.999466
ENSMUSG00000074649.6	BC029722	79.2743	0.290184	0.255041	0.999466
ENSMUSG00000028917.14	Plekhm2	218.816	0.28997	0.202037	0.999466
ENSMUSG00000027438.14	Napb	104.098	0.289948	0.391359	0.999466
ENSMUSG00000032322.14	Pstpip1	307.657	0.289663	0.495106	0.999466
ENSMUSG00000025888.5	Casp1	546.558	0.289542	0.401147	0.999466
ENSMUSG00000005057.13	Sh2b2	142.528	0.289514	0.466789	0.999466
ENSMUSG00000001173.15	Ocrl	251.445	0.28933	0.26685	0.999466
ENSMUSG00000052087.13	Rgs14	125.872	0.289203	0.495336	0.999466
ENSMUSG00000051341.5	Zfp52	189.959	0.289078	0.310206	0.999466
ENSMUSG00000044258.9	Ctla2a	661.341	0.289061	0.369386	0.999466
ENSMUSG00000018654.17	Ikzf1	179.991	0.288976	0.495738	0.999466
ENSMUSG00000006958.13	Chrd	142.111	0.288934	0.467971	0.999466
ENSMUSG00000007379.15	Dennd2c	201.905	0.288721	0.403853	0.999466
ENSMUSG00000028931.11	Kcnab2	378.348	0.288627	0.497134	0.999466
ENSMUSG00000093661.1	Eif4e3	266.876	0.288582	0.444881	0.999466
ENSMUSG00000031290.14	Lrch2	52.3689	0.288381	0.409901	0.999466
ENSMUSG00000029373.7	Pf4	733.403	0.28826	0.353808	0.999466
ENSMUSG00000007458.14	M6pr	1388.37	0.2882	0.171348	0.999466
ENSMUSG00000084126.1	Gm15844	137.131	0.28802	0.495321	0.999466
ENSMUSG00000063234.4	Gpr84	378.107	0.288012	0.494253	0.999466
ENSMUSG00000048583.16	Igf2	37.1976	0.287972	0.497945	0.999466
ENSMUSG00000093738.2	AI606473	75.8276	0.287913	0.470961	0.999466
ENSMUSG00000038702.6	Dsel	646.156	0.287883	0.466597	0.999466
ENSMUSG00000048138.9	Dmrt2	186.617	0.287395	0.493779	0.999466
ENSMUSG00000030811.14	Fbxl19	38.0591	0.287233	0.480121	0.999466
ENSMUSG00000097583.2	6430590A07Rik	54.0072	0.287188	0.289313	0.999466
ENSMUSG00000025272.16	Tro	47.1377	0.286983	0.498463	0.999466
ENSMUSG00000020573.16	Pik3cg	273.393	0.286613	0.494203	0.999466
ENSMUSG00000089670.1	Gm16581	63.0458	0.286308	0.419971	0.999466
ENSMUSG00000072621.13	Slfn10-ps	297.621	0.286115	0.439738	0.999466
ENSMUSG00000025377.14	Tepsin	163.01	0.285991	0.267306	0.999466
ENSMUSG00000023067.13	Cdkn1a	1993.3	0.285867	0.323081	0.999466
ENSMUSG00000043496.7	Tril	475.14	0.285769	0.488633	0.999466
ENSMUSG00000036499.8	Eea1	784.315	0.285627	0.361849	0.999466
ENSMUSG00000047909.11	Ankrd16	545.049	0.285319	0.360188	0.999466
ENSMUSG00000025870.10	Arl10	29.4986	0.28531	0.487561	0.999466
ENSMUSG00000022831.14	Hcls1	984.861	0.285251	0.500931	0.999466
ENSMUSG00000074345.3	Tnfaip8l3	61.0685	0.285179	0.499813	0.999466
ENSMUSG00000058927.5	Gm10053	36.286	0.28464	0.378248	0.999466
ENSMUSG00000006019.15	Dhx34	159.458	0.28441	0.223289	0.999466
ENSMUSG00000058624.12	Gda	1539.47	0.283899	0.365746	0.999466
ENSMUSG00000034993.7	Vat1	858.686	0.283738	0.333808	0.999466
ENSMUSG00000082905.1	Gm7823	127.356	0.283703	0.463232	0.999466
ENSMUSG00000040322.10	Slc25a24	896.539	0.283568	0.445836	0.999466
ENSMUSG00000073403.11	Gm10499	40.3729	0.283261	0.498227	0.999466
ENSMUSG00000019846.11	Lama4	4623.6	0.283144	0.437817	0.999466
ENSMUSG00000030876.6	Mettl9	356.771	0.282912	0.261104	0.999466
ENSMUSG00000022012.8	Enox1	250.448	0.282836	0.475557	0.999466
ENSMUSG00000050558.13	Prokr2	122.276	0.28282	0.505134	0.999466
ENSMUSG00000041153.9	Osgin2	91.0653	0.282605	0.459056	0.999466
ENSMUSG00000051548.4	Gm6365	27.0801	0.282387	0.40676	0.999466
ENSMUSG00000042246.4	Tmc7	33.3953	0.28211	0.481533	0.999466
ENSMUSG00000030722.7	Nfatc2ip	35.2439	0.281819	0.362616	0.999466
ENSMUSG00000071528.3	Usmg5	46.0047	0.281764	0.313862	0.999466
ENSMUSG00000058173.11	Smco4	79.6949	0.281472	0.283513	0.999466
ENSMUSG00000052102.14	Gnpda1	437.609	0.281427	0.410624	0.999466
ENSMUSG00000087938.1	Gm26049	28.941	0.281389	0.422546	0.999466
ENSMUSG00000022971.18	Ifnar2	260.23	0.281288	0.366122	0.999466
ENSMUSG00000081553.1	Ccdc50-ps	125.747	0.281266	0.245448	0.999466
ENSMUSG00000029371.7	Cxcl5	398.236	0.281057	0.49023	0.999466
ENSMUSG00000015652.9	Steap1	248.373	0.281038	0.428805	0.999466
ENSMUSG00000031506.11	Ptpn7	321.472	0.280983	0.508541	0.999466
ENSMUSG00000025937.6	Lactb2	383.908	0.280795	0.296147	0.999466
ENSMUSG00000020143.15	Dock2	623.598	0.280745	0.508294	0.999466
ENSMUSG00000040747.9	Cd53	2334.26	0.280715	0.33604	0.999466
ENSMUSG00000027746.13	Ufm1	795.445	0.280714	0.162936	0.999466
ENSMUSG00000078919.10	Dpm1	181.194	0.280601	0.252814	0.999466
ENSMUSG00000024312.9	Wdr46	144.009	0.280351	0.400571	0.999466
ENSMUSG00000018927.3	Ccl6	1835.19	0.280312	0.335922	0.999466
ENSMUSG00000048621.3	Gm6377	478.878	0.280222	0.50834	0.999466
ENSMUSG00000022150.16	Dab2	4002.2	0.280138	0.391068	0.999466
ENSMUSG00000035629.17	Rubcn	544.025	0.280109	0.217574	0.999466
ENSMUSG00000016206.6	H2-M3	1046.17	0.279778	0.313355	0.999466
ENSMUSG00000085347.1	Hk1os	27.3724	0.279749	0.409759	0.999466
ENSMUSG00000028007.13	Snx7	396.568	0.279586	0.38142	0.999466
ENSMUSG00000021508.10	Cxcl14	1593.24	0.279517	0.439147	0.999466
ENSMUSG00000046330.9	Rpl37a	131.443	0.279114	0.206654	0.999466
ENSMUSG00000032698.15	Lmo2	221.746	0.279069	0.434966	0.999466
ENSMUSG00000058192.15	Zfp846	146.019	0.27896	0.364798	0.999466
ENSMUSG00000031304.18	Il2rg	614.223	0.278712	0.492824	0.999466
ENSMUSG00000060181.5	Slc35e3	75.6439	0.278413	0.363054	0.999466
ENSMUSG00000020514.8	Mrpl22	168.347	0.27818	0.160781	0.999466
ENSMUSG00000014039.17	Prdm15	234.032	0.27816	0.126709	0.999466
ENSMUSG00000022529.11	Zfp263	1049.42	0.278151	0.287119	0.999466
ENSMUSG00000001661.5	Hoxc6	27.9037	0.277939	0.415756	0.999466
ENSMUSG00000038607.12	Gng10	29.3713	0.277928	0.453817	0.999466
ENSMUSG00000022438.6	Parvb	186.899	0.27783	0.513429	0.999466
ENSMUSG00000027236.8	Eif3j1	41.4502	0.277705	0.392844	0.999466
ENSMUSG00000020495.13	Smg8	116.446	0.277695	0.265081	0.999466
ENSMUSG00000033705.16	Stard9	509.892	0.277652	0.421241	0.999466
ENSMUSG00000020439.17	Smtn	412.6	0.277623	0.37958	0.999466
ENSMUSG00000046687.5	Gm5424	903.819	0.276935	0.305019	0.999466
ENSMUSG00000053291.15	Rab4b	40.3706	0.276885	0.391426	0.999466
ENSMUSG00000084919.1	Ptprtos	35.268	0.276696	0.49501	0.999466
ENSMUSG00000030403.9	Vasp	453.619	0.276486	0.318789	0.999466
ENSMUSG00000039693.11	Msantd3	214.245	0.276452	0.320669	0.999466
ENSMUSG00000031555.13	Adam9	1863.87	0.276422	0.417035	0.999466
ENSMUSG00000003500.13	Impdh1	289.004	0.276345	0.435159	0.999466
ENSMUSG00000002017.9	Fam98a	591.348	0.275957	0.13645	0.999466
ENSMUSG00000037260.7	Hgsnat	576.548	0.275894	0.243301	0.999466
ENSMUSG00000039942.15	Ptger4	94.9819	0.275524	0.477768	0.999466
ENSMUSG00000034854.8	Mfsd12	199.795	0.275394	0.374774	0.999466
ENSMUSG00000041420.18	Meis3	113.254	0.27535	0.472541	0.999466
ENSMUSG00000056529.7	Ptafr	1109.27	0.275313	0.498223	0.999466
ENSMUSG00000038742.6	Angptl6	37.376	0.275285	0.413731	0.999466
ENSMUSG00000090946.3	Ccdc71l	84.0382	0.275069	0.413308	0.999466
ENSMUSG00000042258.13	Isl1	29.5749	0.275013	0.517293	0.999466
ENSMUSG00000022125.6	Cln5	329.257	0.274537	0.350455	0.999466
ENSMUSG00000044712.15	Slc38a6	156.153	0.274472	0.380027	0.999466
ENSMUSG00000048787.12	Dcun1d3	559.618	0.274244	0.469226	0.999466
ENSMUSG00000036764.11	Dnajc12	103.842	0.274152	0.37717	0.999466
ENSMUSG00000029059.9	Fam213b	424.673	0.273852	0.343329	0.999466
ENSMUSG00000103292.1	Gm35048	76.052	0.2738	0.509107	0.999466
ENSMUSG00000028347.14	Tmeff1	94.4572	0.273262	0.484152	0.999466
ENSMUSG00000033581.16	Igf2bp2	304.355	0.273162	0.384776	0.999466
ENSMUSG00000020152.7	Actr2	3090.77	0.27295	0.105598	0.999466
ENSMUSG00000079491.9	H2-T10	113.96	0.272899	0.269175	0.999466
ENSMUSG00000082319.3	Gm8822	512.712	0.272898	0.22873	0.999466
ENSMUSG00000082243.1	Gm3810	37.7716	0.272877	0.415795	0.999466
ENSMUSG00000063172.13	Hspb11	216.329	0.272832	0.21494	0.999466
ENSMUSG00000024943.8	Smc5	572.2	0.272667	0.127576	0.999466
ENSMUSG00000060924.14	Csmd1	28.4367	0.272642	0.447927	0.999466
ENSMUSG00000027132.3	Katnbl1	376.161	0.272634	0.373171	0.999466
ENSMUSG00000055963.12	Triqk	202.988	0.272324	0.493086	0.999466
ENSMUSG00000001128.7	Cfp	1453.53	0.272047	0.492155	0.999466
ENSMUSG00000021728.7	Emb	841.966	0.27198	0.477932	0.999466
ENSMUSG00000032558.18	Nphp3	63.214	0.271926	0.505229	0.999466
ENSMUSG00000022974.12	Paxbp1	366.704	0.271841	0.284862	0.999466
ENSMUSG00000058755.3	Osm	586.363	0.271656	0.52283	0.999466
ENSMUSG00000034247.9	Plekhm1	630.825	0.271598	0.402088	0.999466
ENSMUSG00000055994.15	Nod2	110.727	0.271277	0.395967	0.999466
ENSMUSG00000034898.15	Filip1	177.424	0.271124	0.517934	0.999466
ENSMUSG00000037266.18	Rsrp1	686.893	0.270998	0.116513	0.999466
ENSMUSG00000062352.13	Itgb1bp1	718.097	0.270824	0.296061	0.999466
ENSMUSG00000026480.12	Ncf2	343.725	0.270814	0.522984	0.999466
ENSMUSG00000009772.15	Nuak2	104.497	0.270655	0.42306	0.999466
ENSMUSG00000020863.15	Luc7l3	1426.18	0.270627	0.159933	0.999466
ENSMUSG00000006395.16	Hyi	134.459	0.270525	0.366845	0.999466
ENSMUSG00000051498.6	Tlr6	113.514	0.270483	0.518291	0.999466
ENSMUSG00000020086.6	H2afy2	29.0198	0.270418	0.453242	0.999466
ENSMUSG00000037434.7	Slc30a1	87.7484	0.270097	0.338016	0.999466
ENSMUSG00000057236.10	Rbbp4	1753.46	0.270029	0.115319	0.999466
ENSMUSG00000023992.14	Trem2	1057.31	0.269881	0.500787	0.999466
ENSMUSG00000057666.18	Gapdh	160.644	0.269626	0.462335	0.999466
ENSMUSG00000029534.17	St7	179.256	0.269619	0.449241	0.999466
ENSMUSG00000038623.9	Tm6sf1	91.616	0.26951	0.524331	0.999466
ENSMUSG00000045092.8	S1pr1	418.573	0.269502	0.518121	0.999466
ENSMUSG00000016528.10	Mapkapk2	269.29	0.269355	0.278378	0.999466
ENSMUSG00000029009.17	Mthfr	508.034	0.269326	0.419084	0.999466
ENSMUSG00000039270.9	Megf9	289.098	0.269204	0.515566	0.999466
ENSMUSG00000003206.6	Ebi3	151.004	0.269184	0.526522	0.999466
ENSMUSG00000103548.1	Gm37670	40.487	0.269144	0.341955	0.999466
ENSMUSG00000042286.13	Stab1	1724.11	0.269091	0.526594	0.999466
ENSMUSG00000001542.6	Ell2	216.438	0.268931	0.490529	0.999466
ENSMUSG00000017485.10	Top2b	664.793	0.268786	0.338076	0.999466
ENSMUSG00000023927.15	Satb1	31.3156	0.268688	0.432916	0.999466
ENSMUSG00000020611.14	Gna13	1293.28	0.268611	0.351469	0.999466
ENSMUSG00000042846.8	Lrrtm3	55.6317	0.268607	0.525191	0.999466
ENSMUSG00000058706.5	0610030E20Rik	256.685	0.268565	0.184772	0.999466
ENSMUSG00000073902.5	Gm1966	53.7343	0.268521	0.519878	0.999466
ENSMUSG00000032737.12	Inppl1	97.1981	0.268356	0.468632	0.999466
ENSMUSG00000028001.16	Fga	215.55	0.268298	0.527564	0.999466
ENSMUSG00000020027.18	Socs2	687.224	0.268067	0.476431	0.999466
ENSMUSG00000059456.13	Ptk2b	564.187	0.268036	0.505519	0.999466
ENSMUSG00000019943.9	Atp2b1	1850.54	0.267972	0.185476	0.999466
ENSMUSG00000026104.14	Stat1	750.255	0.267899	0.267316	0.999466
ENSMUSG00000037362.8	Nov	747.295	0.267798	0.471681	0.999466
ENSMUSG00000026395.16	Ptprc	1526.31	0.267725	0.527749	0.999466
ENSMUSG00000035711.4	Dok3	131.055	0.267545	0.529022	0.999466
ENSMUSG00000000290.13	Itgb2	2925.11	0.267498	0.500833	0.999466
ENSMUSG00000032740.16	Ccdc88a	541.032	0.267406	0.230661	0.999466
ENSMUSG00000038984.3	Tspyl5	62.1473	0.26737	0.507489	0.999466
ENSMUSG00000087518.1	Gm13561	25.0462	0.267336	0.524543	0.999466
ENSMUSG00000068335.6	Dok1	1196.18	0.267187	0.415885	0.999466
ENSMUSG00000026749.11	Nek6	615.68	0.267094	0.465325	0.999466
ENSMUSG00000031822.18	Gse1	63.9492	0.267063	0.335712	0.999466
ENSMUSG00000031963.7	Bmper	1738.7	0.266739	0.501343	0.999466
ENSMUSG00000049305.6	Ccdc71	629.162	0.266685	0.353493	0.999466
ENSMUSG00000046718.7	Bst2	1119.46	0.266671	0.169868	0.999466
ENSMUSG00000015355.13	Cd48	607.295	0.266639	0.523332	0.999466
ENSMUSG00000038612.16	Mcl1	1644.45	0.266616	0.231507	0.999466
ENSMUSG00000034947.13	Tmem106a	2002.9	0.266523	0.367616	0.999466
ENSMUSG00000040280.9	Ndufa4l2	1187.5	0.266338	0.325766	0.999466
ENSMUSG00000067288.12	Rps28	35.0399	0.266336	0.466994	0.999466
ENSMUSG00000104394.2	Gm37254	34.1334	0.266282	0.431629	0.999466
ENSMUSG00000042821.7	Snai1	651.142	0.266242	0.482519	0.999466
ENSMUSG00000083912.1	Gm5391	107.543	0.265991	0.213725	0.999466
ENSMUSG00000085399.7	Foxd2os	30.7113	0.26556	0.528989	0.999466
ENSMUSG00000030560.16	Ctsc	3490.87	0.265212	0.474651	0.999466
ENSMUSG00000026880.11	Stom	1646.38	0.26519	0.346266	0.999466
ENSMUSG00000025545.9	Clybl	533.654	0.264982	0.366034	0.999466
ENSMUSG00000024617.16	Camk2a	32.6672	0.264894	0.481464	0.999466
ENSMUSG00000095385.1	D630033O11Rik	89.6039	0.264789	0.524154	0.999466
ENSMUSG00000037010.7	Apln	150.384	0.264718	0.498073	0.999466
ENSMUSG00000046561.9	Arsj	164.152	0.264604	0.520446	0.999466
ENSMUSG00000040592.11	Cd79b	372.983	0.2645	0.480727	0.999466
ENSMUSG00000031712.8	Il15	356.821	0.264416	0.444738	0.999466
ENSMUSG00000087298.3	Gm9392	204.927	0.264377	0.230093	0.999466
ENSMUSG00000032350.8	Gclc	140.757	0.264058	0.393919	0.999466
ENSMUSG00000027435.8	Cd93	923.646	0.264046	0.534264	0.999466
ENSMUSG00000058056.15	Palld	371.134	0.264017	0.483987	0.999466
ENSMUSG00000022295.7	Atp6v1c1	1468	0.264003	0.28745	0.999466
ENSMUSG00000100831.1	Gm17847	40.8386	0.263707	0.473006	0.999466
ENSMUSG00000035407.8	Kank4	32.8664	0.263363	0.526859	0.999466
ENSMUSG00000096221.3	1500002C15Rik	37.4948	0.263276	0.526539	0.999466
ENSMUSG00000030214.6	Plbd1	392.973	0.263122	0.536003	0.999466
ENSMUSG00000049882.9	Vcpkmt	94.8203	0.263062	0.492245	0.999466
ENSMUSG00000079652.8	Fam71f2	55.1378	0.263055	0.522586	0.999466
ENSMUSG00000071335.4	Mfsd4b3	33.0921	0.263012	0.493586	0.999466
ENSMUSG00000062210.13	Tnfaip8	941.835	0.262896	0.410233	0.999466
ENSMUSG00000091089.1	A930018M24Rik	26.8619	0.262883	0.535861	0.999466
ENSMUSG00000086370.8	Ftx	84.2741	0.262861	0.478103	0.999466
ENSMUSG00000097451.9	Rian	684.448	0.26282	0.517918	0.999466
ENSMUSG00000082433.2	Gm9025	194.406	0.262776	0.536541	0.999466
ENSMUSG00000039981.5	Zc3h12d	67.3834	0.262589	0.53015	0.999466
ENSMUSG00000036461.15	Elf1	887.277	0.262549	0.25161	0.999466
ENSMUSG00000039253.7	Fn3krp	94.2992	0.262481	0.314715	0.999466
ENSMUSG00000070034.13	Sp110	323.442	0.262473	0.453443	0.999466
ENSMUSG00000031557.15	Plekha2	1271.57	0.262252	0.227423	0.999466
ENSMUSG00000035595.6	1600002K03Rik	147.294	0.26216	0.260476	0.999466
ENSMUSG00000082088.1	Gm15753	190.995	0.262128	0.323662	0.999466
ENSMUSG00000033400.14	Agl	319.162	0.261879	0.237408	0.999466
ENSMUSG00000089847.7	Timm10b	261.103	0.261687	0.191168	0.999466
ENSMUSG00000030888.13	Rrp8	498.192	0.261675	0.293327	0.999466
ENSMUSG00000009654.4	Oit3	53.2505	0.261496	0.536911	0.999466
ENSMUSG00000090626.9	Tex9	124.556	0.26137	0.381094	0.999466
ENSMUSG00000075010.4	AW112010	802.779	0.261238	0.345453	0.999466
ENSMUSG00000031079.12	Zfp300	41.5373	0.261096	0.525149	0.999466
ENSMUSG00000087700.1	Gm15283	48.7298	0.261083	0.534395	0.999466
ENSMUSG00000021054.5	Sgpp1	325.97	0.260931	0.50535	0.999466
ENSMUSG00000022221.13	Ripk3	1121.56	0.260789	0.379166	0.999466
ENSMUSG00000021998.16	Lcp1	3125.07	0.260583	0.495312	0.999466
ENSMUSG00000042659.14	Arrdc4	264.04	0.26049	0.402334	0.999466
ENSMUSG00000033268.8	Duox1	466.484	0.260123	0.532107	0.999466
ENSMUSG00000018672.15	Copz2	248.774	0.259961	0.463477	0.999466
ENSMUSG00000031402.12	Mpp1	1452.99	0.259875	0.367882	0.999466
ENSMUSG00000004567.15	Mcoln1	175.934	0.259849	0.301972	0.999466
ENSMUSG00000098112.7	Bin2	292.539	0.259566	0.541479	0.999466
ENSMUSG00000039683.16	Sdk1	297.76	0.259391	0.517082	0.999466
ENSMUSG00000099870.1	Gm7200	45.4928	0.259373	0.3595	0.999466
ENSMUSG00000034480.18	Diaph2	249.017	0.259234	0.368493	0.999466
ENSMUSG00000103567.1	Pcdhga5	70.809	0.259232	0.450953	0.999466
ENSMUSG00000000301.16	Pemt	51.7685	0.259221	0.436403	0.999466
ENSMUSG00000035799.5	Twist1	191.103	0.259181	0.519997	0.999466
ENSMUSG00000040537.17	Adam22	410.005	0.259127	0.523862	0.999466
ENSMUSG00000060538.14	Tmem219	663.034	0.259116	0.151441	0.999466
ENSMUSG00000031255.14	Sytl4	95.0375	0.259053	0.541297	0.999466
ENSMUSG00000036067.12	Slc2a6	357.491	0.258982	0.541682	0.999466
ENSMUSG00000040296.15	Ddx58	1105.66	0.258738	0.267242	0.999466
ENSMUSG00000019970.15	Sgk1	3322.85	0.258628	0.454886	0.999466
ENSMUSG00000024845.17	Tmem134	222.031	0.258624	0.441799	0.999466
ENSMUSG00000048376.5	F2r	2932.54	0.258613	0.51441	0.999466
ENSMUSG00000031981.7	Capn9	25.7422	0.258507	0.541876	0.999466
ENSMUSG00000024276.6	Zfp397	282.486	0.258486	0.164612	0.999466
ENSMUSG00000015501.10	Hivep2	699.825	0.258433	0.369099	0.999466
ENSMUSG00000068798.10	Rap1a	440.277	0.258423	0.309723	0.999466
ENSMUSG00000031631.15	Cfap97	315.911	0.25841	0.157853	0.999466
ENSMUSG00000026723.10	Trdmt1	129.948	0.25816	0.319108	0.999466
ENSMUSG00000052419.7	2610001J05Rik	1112.94	0.258042	0.324618	0.999466
ENSMUSG00000032026.6	Rexo2	721.586	0.258002	0.317099	0.999466
ENSMUSG00000029695.13	Aass	73.9617	0.257946	0.537232	0.999466
ENSMUSG00000070003.6	Ssbp4	26.562	0.257893	0.524305	0.999466
ENSMUSG00000040734.14	Ppp1r13l	71.9926	0.257736	0.432666	0.999466
ENSMUSG00000032334.9	Loxl1	1640.88	0.257482	0.474075	0.999466
ENSMUSG00000051391.9	Ywhag	2103.97	0.257449	0.325386	0.999466
ENSMUSG00000025969.15	Nrp2	316.297	0.257298	0.535582	0.999466
ENSMUSG00000034795.14	Ccdc122	70.6713	0.257277	0.453509	0.999466
ENSMUSG00000024887.9	Asah2	72.1736	0.257171	0.526933	0.999466
ENSMUSG00000025059.16	Gk	283.19	0.257159	0.531685	0.999466
ENSMUSG00000031133.12	Arhgef6	290.788	0.257132	0.483013	0.999466
ENSMUSG00000104585.1	4921511C10Rik	45.9731	0.257127	0.389194	0.999466
ENSMUSG00000092060.4	Bend4	85.8658	0.257125	0.545308	0.999466
ENSMUSG00000031916.17	Cog8	45.4593	0.256855	0.415093	0.999466
ENSMUSG00000031543.18	Ank1	48.0505	0.256653	0.546051	0.999466
ENSMUSG00000049686.14	Orai1	81.9164	0.256568	0.397	0.999466
ENSMUSG00000040455.17	Usp45	229.463	0.256528	0.399255	0.999466
ENSMUSG00000051243.13	Islr2	67.2609	0.256519	0.546257	0.999466
ENSMUSG00000043832.13	Clec4a3	241.749	0.256224	0.546747	0.999466
ENSMUSG00000024965.8	Fermt3	1325.02	0.256111	0.543478	0.999466
ENSMUSG00000085053.1	Gm14809	27.1909	0.256053	0.535968	0.999466
ENSMUSG00000069743.4	Zfp820	104.39	0.255854	0.510156	0.999466
ENSMUSG00000056220.14	Pla2g4a	1558.56	0.255839	0.51597	0.999466
ENSMUSG00000017404.12	Rpl19	25.9511	0.255803	0.475048	0.999466
ENSMUSG00000030659.14	Nucb2	2039.93	0.255687	0.466347	0.999466
ENSMUSG00000021886.6	Gpr65	462.955	0.255587	0.546463	0.999466
ENSMUSG00000107355.1	AI839979	40.4807	0.255308	0.545625	0.999466
ENSMUSG00000043822.18	Adamtsl5	365.279	0.255295	0.532105	0.999466
ENSMUSG00000004896.16	Rrnad1	396.891	0.25528	0.143944	0.999466
ENSMUSG00000056145.5	AI504432	60.1285	0.255253	0.548082	0.999466
ENSMUSG00000060923.5	Acyp2	179.072	0.255185	0.427471	0.999466
ENSMUSG00000001419.17	Mef2d	510.266	0.254996	0.291432	0.999466
ENSMUSG00000055782.8	Abcd2	612.671	0.254884	0.529513	0.999466
ENSMUSG00000052593.15	Adam17	2241.04	0.254722	0.366171	0.999466
ENSMUSG00000058239.13	Usf2	126.515	0.254416	0.366702	0.999466
ENSMUSG00000080772.1	Gm12543	56.4734	0.254387	0.342758	0.999466
ENSMUSG00000035042.2	Ccl5	364.191	0.254323	0.515705	0.999466
ENSMUSG00000058351.10	Smim4	247.726	0.254228	0.243269	0.999466
ENSMUSG00000002204.8	Napsa	439.326	0.254075	0.550051	0.999466
ENSMUSG00000014778.10	Fhod1	70.2939	0.254009	0.47593	0.999466
ENSMUSG00000073856.10	Iqck	43.3501	0.253906	0.496104	0.999466
ENSMUSG00000097391.8	Mirg	77.4333	0.253887	0.513749	0.999466
ENSMUSG00000031453.15	Rasa3	1007.67	0.253793	0.432204	0.999466
ENSMUSG00000050505.7	Pcdh20	387.322	0.253716	0.5492	0.999466
ENSMUSG00000020182.16	Ddc	67.404	0.253556	0.550047	0.999466
ENSMUSG00000056144.13	Trim34a	73.0877	0.253542	0.46917	0.999466
ENSMUSG00000049090.2	Zadh2	872.289	0.253531	0.511852	0.999466
ENSMUSG00000020608.6	Smc6	1189.83	0.253498	0.374418	0.999466
ENSMUSG00000002458.13	Rgs19	790.221	0.253467	0.323847	0.999466
ENSMUSG00000075478.2	Slitrk1	138.771	0.253396	0.537284	0.999466
ENSMUSG00000029765.12	Plxna4	37.3795	0.253303	0.534532	0.999466
ENSMUSG00000037960.10	Card19	744.906	0.253046	0.457998	0.999466
ENSMUSG00000044162.11	Tnip3	477.952	0.252959	0.549474	0.999466
ENSMUSG00000044224.16	Dnajc21	235.172	0.252588	0.225103	0.999466
ENSMUSG00000053716.9	Dusp7	241.827	0.252401	0.413636	0.999466
ENSMUSG00000025701.12	Alox5	183.037	0.252237	0.54108	0.999466
ENSMUSG00000043313.6	Pcdhb19	93.767	0.25217	0.516276	0.999466
ENSMUSG00000024897.8	Apba1	102.565	0.252088	0.529302	0.999466
ENSMUSG00000035152.14	Ap2b1	1510.12	0.251967	0.388758	0.999466
ENSMUSG00000024053.10	Emilin2	1399.04	0.251695	0.502915	0.999466
ENSMUSG00000032500.10	Dclk3	27.4277	0.251612	0.553854	0.999466
ENSMUSG00000057103.10	Nat8f1	52.5325	0.251515	0.410134	0.999466
ENSMUSG00000003518.13	Dusp3	2032.77	0.251392	0.370339	0.999466
ENSMUSG00000036916.13	Zfp280c	199.302	0.251259	0.222081	0.999466
ENSMUSG00000038172.14	Ttc39b	459.031	0.251159	0.494539	0.999466
ENSMUSG00000020886.16	Dlg4	317.151	0.251135	0.467204	0.999466
ENSMUSG00000042498.16	D330045A20Rik	43.3298	0.251116	0.536062	0.999466
ENSMUSG00000056130.9	Ticam2	110.259	0.250797	0.553712	0.999466
ENSMUSG00000028634.16	Hivep3	482.561	0.250785	0.499112	0.999466
ENSMUSG00000029771.12	Irf5	747.033	0.250723	0.555262	0.999466
ENSMUSG00000003657.8	Calb2	62.7885	0.250422	0.514976	0.999466
ENSMUSG00000090122.3	Kcne1l	39.5486	0.250418	0.554468	0.999466
ENSMUSG00000038280.12	Ostm1	349.807	0.250349	0.375863	0.999466
ENSMUSG00000026536.9	Ifi211	474.207	0.250207	0.411831	0.999466
ENSMUSG00000060743.12	H3f3a	124.392	0.250176	0.246179	0.999466
ENSMUSG00000035597.18	Prpf39	1202.61	0.250046	0.238763	0.999466
ENSMUSG00000027951.16	Adar	663.047	0.249723	0.427429	0.999466
ENSMUSG00000079442.12	St6galnac4	951.333	0.249514	0.433528	0.999466
ENSMUSG00000078495.10	Zfp984	119.9	0.249506	0.455145	0.999466
ENSMUSG00000037112.16	Sik2	97.9819	0.249407	0.341081	0.999466
ENSMUSG00000018920.11	Cxcl16	1132.41	0.249322	0.487912	0.999466
ENSMUSG00000068966.10	Zbtb34	110.168	0.249307	0.350976	0.999466
ENSMUSG00000027016.17	Zfp385b	133.891	0.249266	0.533867	0.999466
ENSMUSG00000050578.9	Mmp13	837.322	0.249181	0.556946	0.999466
ENSMUSG00000046711.15	Hmga1	135.356	0.249051	0.471134	0.999466
ENSMUSG00000066258.13	Trim12a	321.885	0.249006	0.419396	0.999466
ENSMUSG00000031931.3	Ankrd49	401.044	0.248963	0.367973	0.999466
ENSMUSG00000027808.8	Serp1	715.343	0.248821	0.236058	0.999466
ENSMUSG00000005413.7	Hmox1	2638.27	0.248768	0.193377	0.999466
ENSMUSG00000000031.15	H19	358.231	0.248709	0.551519	0.999466
ENSMUSG00000063611.4	Gm10134	79.3922	0.248432	0.558631	0.999466
ENSMUSG00000086429.9	Gt(ROSA)26Sor	269.025	0.248355	0.167463	0.999466
ENSMUSG00000096916.7	Zfp850	53.1787	0.248233	0.473508	0.999466
ENSMUSG00000028646.16	Rragc	426.974	0.248061	0.253057	0.999466
ENSMUSG00000040390.13	Map3k10	35.1128	0.248038	0.403827	0.999466
ENSMUSG00000043484.3	Gm5867	149.554	0.248038	0.338938	0.999466
ENSMUSG00000026042.16	Col5a2	8481.29	0.247766	0.434227	0.999466
ENSMUSG00000097423.1	Gm26522	157.355	0.247761	0.559999	0.999466
ENSMUSG00000074513.9	Arfip1	217.212	0.247744	0.317936	0.999466
ENSMUSG00000027522.15	Stx16	469.797	0.247697	0.181443	0.999466
ENSMUSG00000020003.15	Pex7	53.9443	0.247656	0.369408	0.999466
ENSMUSG00000066151.11	Fkbp15	832.049	0.247565	0.396172	0.999466
ENSMUSG00000057315.14	Arhgap24	1324.24	0.247543	0.508886	0.999466
ENSMUSG00000014075.15	Tctex1d2	324.667	0.247543	0.232756	0.999466
ENSMUSG00000087528.1	9830144P21Rik	284.779	0.247541	0.538387	0.999466
ENSMUSG00000084989.3	Crocc2	34.4122	0.247444	0.536799	0.999466
ENSMUSG00000067787.10	Blcap	1063.54	0.247423	0.328338	0.999466
ENSMUSG00000038034.15	Igsf8	457.136	0.247135	0.184854	0.999466
ENSMUSG00000106257.1	Gm9023	29.8389	0.247122	0.442155	0.999466
ENSMUSG00000095306.2	NA	72.2808	0.246944	0.45253	0.999466
ENSMUSG00000056962.11	Jmjd6	697.984	0.246872	0.296429	0.999466
ENSMUSG00000031596.15	Slc7a2	1121.83	0.246867	0.560793	0.999466
ENSMUSG00000022965.7	Ifngr2	812.103	0.246853	0.329585	0.999466
ENSMUSG00000060397.6	Zfp128	50.984	0.246821	0.464907	0.999466
ENSMUSG00000019782.9	Rwdd1	80.4084	0.246614	0.37726	0.999466
ENSMUSG00000047822.7	Angptl8	56.6327	0.24658	0.56032	0.999466
ENSMUSG00000107331.1	Gm42732	51.0141	0.24657	0.48641	0.999466
ENSMUSG00000042275.8	Pelo	107.603	0.246506	0.409423	0.999466
ENSMUSG00000021102.3	Glrx5	89.1282	0.246504	0.40142	0.999466
ENSMUSG00000097352.7	C920009B18Rik	59.6127	0.246469	0.561995	0.999466
ENSMUSG00000020087.4	Tysnd1	52.702	0.246249	0.369208	0.999466
ENSMUSG00000039108.14	Lsm14b	143.232	0.246117	0.456764	0.999466
ENSMUSG00000022876.17	Samsn1	379.474	0.24607	0.560739	0.999466
ENSMUSG00000059901.12	Adamts14	196.798	0.2458	0.54249	0.999466
ENSMUSG00000062078.14	Qk	1347.45	0.245741	0.456966	0.999466
ENSMUSG00000021770.10	Samd8	1158.84	0.245579	0.412723	0.999466
ENSMUSG00000035105.5	Egln3	446.515	0.245522	0.560457	0.999466
ENSMUSG00000038070.15	Cntln	197.116	0.245372	0.549631	0.999466
ENSMUSG00000075707.5	Dio3	126.361	0.245115	0.560207	0.999466
ENSMUSG00000030823.6	9130019O22Rik	120.363	0.244716	0.387867	0.999466
ENSMUSG00000037731.5	Themis2	508.864	0.244369	0.564657	0.999466
ENSMUSG00000019761.9	Krt10	115.666	0.244339	0.460493	0.999466
ENSMUSG00000031443.7	F7	279.232	0.244315	0.563866	0.999466
ENSMUSG00000059423.13	Zfp933	110.05	0.244285	0.38631	0.999466
ENSMUSG00000038354.13	Ankrd35	45.0254	0.244284	0.54062	0.999466
ENSMUSG00000026341.16	Actr3	1188.77	0.244259	0.297322	0.999466
ENSMUSG00000038446.7	Cdc40	581.051	0.24419	0.0951108	0.999466
ENSMUSG00000074676.2	Foxs1	282.12	0.244154	0.552954	0.999466
ENSMUSG00000007570.15	Fance	74.0871	0.244106	0.391861	0.999466
ENSMUSG00000068758.7	Il3ra	292.154	0.244071	0.505256	0.999466
ENSMUSG00000032841.15	Prr5l	185.768	0.243737	0.486184	0.999466
ENSMUSG00000050370.4	Ch25h	413.388	0.243717	0.554323	0.999466
ENSMUSG00000030337.16	Vamp1	80.6364	0.243696	0.493998	0.999466
ENSMUSG00000042265.13	Trem1	425.798	0.243613	0.564481	0.999466
ENSMUSG00000046873.18	Mbtps2	243.026	0.243394	0.238132	0.999466
ENSMUSG00000024695.15	Zfp91	578.633	0.243317	0.246449	0.999466
ENSMUSG00000020178.5	Adora2a	25.9449	0.243253	0.565242	0.999466
ENSMUSG00000025408.15	Ddit3	590.574	0.243248	0.191461	0.999466
ENSMUSG00000055202.10	Zfp811	37.1567	0.243167	0.566334	0.999466
ENSMUSG00000021451.15	Sema4d	1214.06	0.243108	0.56714	0.999466
ENSMUSG00000012519.14	Mlkl	617.081	0.242834	0.476588	0.999466
ENSMUSG00000034312.13	Iqsec1	877.799	0.242826	0.336968	0.999466
ENSMUSG00000045551.7	Fpr1	215.671	0.242387	0.565497	0.999466
ENSMUSG00000015222.17	Map2	149.72	0.242365	0.530398	0.999466
ENSMUSG00000006058.10	Snf8	168.517	0.242253	0.294042	0.999466
ENSMUSG00000073489.5	Ifi204	2007.05	0.242119	0.477699	0.999466
ENSMUSG00000042349.13	Ikbke	838.13	0.242115	0.485158	0.999466
ENSMUSG00000081677.1	Mdk-ps1	75.9655	0.242077	0.527434	0.999466
ENSMUSG00000097124.2	A530020G20Rik	30.2586	0.241903	0.568061	0.999466
ENSMUSG00000086451.7	4933431K23Rik	26.5017	0.241792	0.539433	0.999466
ENSMUSG00000083554.1	Gm6645	31.6423	0.241769	0.509554	0.999466
ENSMUSG00000031574.7	Star	148.937	0.241602	0.554009	0.999466
ENSMUSG00000025956.10	Mettl21a	653.702	0.241571	0.478394	0.999466
ENSMUSG00000104324.1	Gm37320	31.0678	0.241483	0.490348	0.999466
ENSMUSG00000024833.14	Pola2	219.226	0.241421	0.308298	0.999466
ENSMUSG00000058818.13	Pirb	869.778	0.241244	0.567117	0.999466
ENSMUSG00000044949.4	Ubtd2	120.364	0.241173	0.511784	0.999466
ENSMUSG00000081718.1	Gm8261	25.5743	0.240954	0.465903	0.999466
ENSMUSG00000034839.5	Larp6	219.015	0.240939	0.54281	0.999466
ENSMUSG00000049562.5	Ap5b1	94.4857	0.240934	0.494269	0.999466
ENSMUSG00000022620.14	Arsa	981.542	0.240917	0.509929	0.999466
ENSMUSG00000025198.16	Erlin1	468.624	0.2409	0.354822	0.999466
ENSMUSG00000040811.15	Eml2	415.739	0.240806	0.563853	0.999466
ENSMUSG00000046351.10	Zfp322a	401.321	0.240745	0.362063	0.999466
ENSMUSG00000039361.9	Picalm	1876.14	0.240688	0.413042	0.999466
ENSMUSG00000021047.6	Nova1	848.765	0.240539	0.569118	0.999466
ENSMUSG00000070327.13	Rnf213	1084.86	0.240341	0.314026	0.999466
ENSMUSG00000031758.9	Cdyl2	189.111	0.24027	0.531851	0.999466
ENSMUSG00000066878.4	Gm10184	41.5823	0.24025	0.414567	0.999466
ENSMUSG00000014353.14	Tmem87b	715.479	0.240116	0.31436	0.999466
ENSMUSG00000051747.14	Ttn	28.6814	0.240001	0.568878	0.999466
ENSMUSG00000104891.1	2510017J16Rik	25.4329	0.239926	0.547342	0.999466
ENSMUSG00000102418.1	Sh2d1b1	55.5488	0.239547	0.572639	0.999466
ENSMUSG00000024598.8	Fbn2	732.555	0.23954	0.538359	0.999466
ENSMUSG00000028948.16	Nol9	247.48	0.239526	0.324486	0.999466
ENSMUSG00000074916.5	Chst14	120.548	0.239367	0.536606	0.999466
ENSMUSG00000024440.12	Pcdh12	103.586	0.239278	0.568627	0.999466
ENSMUSG00000031652.10	N4bp1	437.407	0.239134	0.466672	0.999466
ENSMUSG00000031616.7	Ednra	2052.7	0.238924	0.550755	0.999466
ENSMUSG00000018774.13	Cd68	1905.56	0.238716	0.282981	0.999466
ENSMUSG00000034641.2	Cd300ld	473.977	0.238559	0.57419	0.999466
ENSMUSG00000040599.13	Mis12	516.038	0.238483	0.281493	0.999466
ENSMUSG00000027994.14	Mcub	727.959	0.238441	0.409012	0.999466
ENSMUSG00000099478.1	Gm28370	42.0188	0.238262	0.500379	0.999466
ENSMUSG00000020589.16	Fam49a	572.66	0.238181	0.54635	0.999466
ENSMUSG00000037005.16	Xpnpep2	1837.85	0.238113	0.560193	0.999466
ENSMUSG00000028885.8	Smpdl3b	137.209	0.238021	0.565497	0.999466
ENSMUSG00000020231.15	Dip2a	204.293	0.237983	0.246623	0.999466
ENSMUSG00000011832.15	Evi5l	224.246	0.237932	0.210508	0.999466
ENSMUSG00000027239.14	Mdk	493.78	0.237833	0.545613	0.999466
ENSMUSG00000004885.5	Crabp2	102.795	0.237587	0.574395	0.999466
ENSMUSG00000097660.1	Gm26762	157.827	0.237556	0.55436	0.999466
ENSMUSG00000073535.5	Gm5532	35.7127	0.237554	0.570577	0.999466
ENSMUSG00000007805.4	Twist2	45.6061	0.237478	0.56935	0.999466
ENSMUSG00000038545.13	Cul7	642.663	0.237298	0.315721	0.999466
ENSMUSG00000001827.11	Folr1	35.2248	0.237215	0.51927	0.999466
ENSMUSG00000039512.11	Uhrf1bp1	144.358	0.237161	0.444047	0.999466
ENSMUSG00000019838.10	Slc16a10	68.9799	0.237083	0.535881	0.999466
ENSMUSG00000035878.13	Hykk	261.02	0.237044	0.564256	0.999466
ENSMUSG00000040563.13	Plppr2	116.447	0.237034	0.55154	0.999466
ENSMUSG00000035158.15	Mitf	598.098	0.236894	0.509884	0.999466
ENSMUSG00000098202.1	B830012L14Rik	73.7887	0.236786	0.568788	0.999466
ENSMUSG00000036636.9	Clcn7	1455.14	0.236703	0.404755	0.999466
ENSMUSG00000039201.9	Tbc1d25	37.9221	0.236571	0.518731	0.999466
ENSMUSG00000097439.6	Gm16754	34.9075	0.236533	0.577718	0.999466
ENSMUSG00000039745.7	Htatip2	637.93	0.236525	0.432664	0.999466
ENSMUSG00000071713.4	Csf2rb	1171.98	0.236442	0.573073	0.999466
ENSMUSG00000048806.4	Ifnb1	43.7794	0.236313	0.572536	0.999466
ENSMUSG00000102930.1	Gm38115	68.8899	0.236312	0.536486	0.999466
ENSMUSG00000014776.6	Nol3	69.108	0.236221	0.438629	0.999466
ENSMUSG00000041633.14	Kctd12b	145.013	0.236151	0.543372	0.999466
ENSMUSG00000021614.16	Vcan	3409.38	0.236117	0.529981	0.999466
ENSMUSG00000003346.14	Abhd17a	110.151	0.236034	0.368269	0.999466
ENSMUSG00000028327.14	Stra6l	146.028	0.235958	0.578412	0.999466
ENSMUSG00000015340.10	Cybb	3868.64	0.235951	0.568343	0.999466
ENSMUSG00000029234.13	Tmem165	223.052	0.235868	0.413414	0.999466
ENSMUSG00000050855.16	Zfp940	60.1502	0.235749	0.491826	0.999466
ENSMUSG00000059326.6	Csf2ra	165.338	0.23561	0.573866	0.999466
ENSMUSG00000051579.10	Tceal8	1248.87	0.23559	0.489963	0.999466
ENSMUSG00000020865.16	Abcc3	484.822	0.235588	0.579099	0.999466
ENSMUSG00000030208.15	Emp1	5102.71	0.235437	0.399557	0.999466
ENSMUSG00000020326.7	Ccng1	902.331	0.235379	0.520028	0.999466
ENSMUSG00000037325.10	Bbs7	247.077	0.235338	0.508171	0.999466
ENSMUSG00000038128.6	Camk4	28.3564	0.235258	0.578527	0.999466
ENSMUSG00000073176.4	Zfp449	398.847	0.235038	0.566641	0.999466
ENSMUSG00000030413.7	Pglyrp1	959.703	0.235027	0.534652	0.999466
ENSMUSG00000006941.4	Eif1b	700.087	0.235015	0.21992	0.999466
ENSMUSG00000038425.17	Poli	131.336	0.23495	0.414456	0.999466
ENSMUSG00000063317.7	Usp31	142.674	0.234907	0.395604	0.999466
ENSMUSG00000076441.9	Ass1	358.014	0.234903	0.45056	0.999466
ENSMUSG00000020458.16	Rtn4	1191.36	0.234807	0.369915	0.999466
ENSMUSG00000032419.8	Tbx18	195.029	0.234656	0.572364	0.999466
ENSMUSG00000051319.6	1500011K16Rik	270.41	0.234555	0.339224	0.999466
ENSMUSG00000054843.8	Atrnl1	384.675	0.234311	0.552863	0.999466
ENSMUSG00000027397.14	Slc20a1	2093.86	0.234022	0.53955	0.999466
ENSMUSG00000086240.4	Gm7846	28.9564	0.233924	0.458018	0.999466
ENSMUSG00000034379.8	Wdr5b	139.627	0.233909	0.497676	0.999466
ENSMUSG00000033287.15	Kctd17	141.577	0.233758	0.502947	0.999466
ENSMUSG00000049988.3	Lrrc25	436.683	0.233684	0.582528	0.999466
ENSMUSG00000020420.8	Zfp607a	76.37	0.233661	0.458041	0.999466
ENSMUSG00000104795.1	Gm42783	27.096	0.233428	0.533292	0.999466
ENSMUSG00000042901.10	Aida	594.415	0.233368	0.522121	0.999466
ENSMUSG00000029563.16	Foxp2	30.0387	0.233345	0.536849	0.999466
ENSMUSG00000033902.11	Mapkbp1	150.107	0.233206	0.293005	0.999466
ENSMUSG00000029913.14	Prdm5	178.493	0.233174	0.570694	0.999466
ENSMUSG00000030220.13	Arhgdib	1217.01	0.233073	0.306306	0.999466
ENSMUSG00000090500.1	Gm17057	45.8623	0.233014	0.564235	0.999466
ENSMUSG00000021929.8	Kpna3	1121.86	0.232949	0.26282	0.999466
ENSMUSG00000022667.17	Cd200r1	216.429	0.232905	0.583083	0.999466
ENSMUSG00000029366.10	Dck	517.441	0.232905	0.551486	0.999466
ENSMUSG00000015120.15	Ube2i	424.848	0.232868	0.275491	0.999466
ENSMUSG00000067377.12	Tspan6	979.743	0.232856	0.539362	0.999466
ENSMUSG00000020460.15	Rps27a	118.31	0.232664	0.456193	0.999466
ENSMUSG00000024525.6	Impa2	102.933	0.232478	0.58444	0.999466
ENSMUSG00000007682.5	Dio2	154.168	0.232225	0.566196	0.999466
ENSMUSG00000040414.7	Slc25a28	152.738	0.232194	0.405949	0.999466
ENSMUSG00000042029.6	Ncapg2	289.734	0.232136	0.526396	0.999466
ENSMUSG00000090021.1	Gm6493	94.4915	0.232071	0.372132	0.999466
ENSMUSG00000086825.1	Gm15675	129.389	0.231987	0.584844	0.999466
ENSMUSG00000070524.1	Fcrlb	25.4247	0.231967	0.55746	0.999466
ENSMUSG00000022864.13	D16Ertd472e	105.855	0.231962	0.404664	0.999466
ENSMUSG00000013707.3	Tnfaip8l2	435.257	0.231847	0.585394	0.999466
ENSMUSG00000045062.4	Pcdhb7	85.5968	0.23177	0.334078	0.999466
ENSMUSG00000073792.11	Alg6	280.942	0.231738	0.459485	0.999466
ENSMUSG00000032491.14	Nradd	380.034	0.231732	0.53685	0.999466
ENSMUSG00000072623.6	Zfp9	645.563	0.231654	0.559691	0.999466
ENSMUSG00000085156.7	Snhg15	152.263	0.231539	0.514166	0.999466
ENSMUSG00000059975.14	Zfp74	199.85	0.231527	0.44727	0.999466
ENSMUSG00000040479.11	Dgkz	1021.46	0.231476	0.573153	0.999466
ENSMUSG00000097487.7	Ptges3l	49.6694	0.231476	0.542588	0.999466
ENSMUSG00000097090.1	Gm26724	33.8697	0.2314	0.48654	0.999466
ENSMUSG00000084094.1	Gm13961	42.8309	0.231346	0.518071	0.999466
ENSMUSG00000031617.16	Tmem184c	449.49	0.231328	0.471564	0.999466
ENSMUSG00000026986.14	Hnmt	149.334	0.231328	0.516145	0.999466
ENSMUSG00000022044.14	Stmn4	92.2691	0.231093	0.586158	0.999466
ENSMUSG00000097325.2	Gm16897	100.49	0.230944	0.570373	0.999466
ENSMUSG00000050288.6	Fzd2	126.83	0.230941	0.538425	0.999466
ENSMUSG00000090307.7	1700071M16Rik	35.3175	0.230632	0.587505	0.999466
ENSMUSG00000042436.12	Mfap4	2453.94	0.230512	0.400645	0.999466
ENSMUSG00000106795.1	Gm43050	90.6084	0.230424	0.587404	0.999466
ENSMUSG00000015750.15	Aph1a	82.9744	0.230333	0.385726	0.999466
ENSMUSG00000094786.1	Gm14403	76.4552	0.229923	0.542649	0.999466
ENSMUSG00000029468.17	P2rx7	730.537	0.229878	0.566001	0.999466
ENSMUSG00000095028.6	Sirpb1b	73.0918	0.229862	0.588136	0.999466
ENSMUSG00000025104.13	Hdgfrp3	130.661	0.229861	0.528224	0.999466
ENSMUSG00000026003.5	Acadl	402.031	0.229701	0.287949	0.999466
ENSMUSG00000039908.14	Slc26a11	553.776	0.22952	0.359942	0.999466
ENSMUSG00000037580.9	Gch1	61.9989	0.22933	0.524047	0.999466
ENSMUSG00000029664.10	Tfpi2	991.021	0.229299	0.554666	0.999466
ENSMUSG00000020101.14	Vsir	1230.01	0.229184	0.470984	0.999466
ENSMUSG00000069255.12	Dusp22	528.787	0.22887	0.5093	0.999466
ENSMUSG00000032246.13	Calml4	176.941	0.228849	0.58918	0.999466
ENSMUSG00000097961.1	Gm27000	118.538	0.228799	0.539385	0.999466
ENSMUSG00000071715.11	Ncf4	665.833	0.228767	0.58895	0.999466
ENSMUSG00000028842.15	Ago3	417.257	0.228655	0.302793	0.999466
ENSMUSG00000023931.4	Efhb	33.5819	0.228559	0.589458	0.999466
ENSMUSG00000104960.1	Snhg8	319.539	0.228523	0.140668	0.999466
ENSMUSG00000087119.4	Atg4a-ps	74.0749	0.228403	0.477479	0.999466
ENSMUSG00000079659.5	Tmem243	159.021	0.228369	0.268619	0.999466
ENSMUSG00000034430.16	Zxdc	153.935	0.228286	0.254578	0.999466
ENSMUSG00000022371.15	Col14a1	5888.46	0.228222	0.511005	0.999466
ENSMUSG00000082194.3	Gm12444	72.3855	0.228171	0.345873	0.999466
ENSMUSG00000020288.13	Ahsa2	333.174	0.228092	0.317653	0.999466
ENSMUSG00000040659.3	Efhd2	650.557	0.227895	0.477859	0.999466
ENSMUSG00000028639.14	Ybx1	560.351	0.227644	0.261866	0.999466
ENSMUSG00000005983.15	1700037C18Rik	45.7739	0.227352	0.573204	0.999466
ENSMUSG00000024381.15	Bin1	405.41	0.227219	0.407506	0.999466
ENSMUSG00000052384.13	Nrros	873.714	0.227101	0.5928	0.999466
ENSMUSG00000026317.7	Cln8	1109.77	0.226895	0.437026	0.999466
ENSMUSG00000026696.15	Vamp4	1108.37	0.226891	0.399119	0.999466
ENSMUSG00000044043.4	Pcdhb14	142.451	0.226861	0.484643	0.999466
ENSMUSG00000022969.13	Il10rb	616.262	0.226856	0.393235	0.999466
ENSMUSG00000059479.7	B3gnt8	191.496	0.226802	0.519765	0.999466
ENSMUSG00000055541.17	Lair1	780.678	0.226799	0.59341	0.999466
ENSMUSG00000073490.10	Ifi207	1973.18	0.226597	0.540338	0.999466
ENSMUSG00000103355.1	Gm2147	71.4239	0.226574	0.470503	0.999466
ENSMUSG00000054737.11	Zfp182	154.653	0.226565	0.55183	0.999466
ENSMUSG00000036106.15	Prr5	67.6264	0.226425	0.573594	0.999466
ENSMUSG00000026811.18	St6galnac6	488.181	0.226313	0.530086	0.999466
ENSMUSG00000025068.7	Gsto1	658.178	0.226051	0.404102	0.999466
ENSMUSG00000015950.13	Ncf1	774.534	0.225998	0.594617	0.999466
ENSMUSG00000107756.1	Gm44164	59.6906	0.225959	0.49102	0.999466
ENSMUSG00000052544.9	St6galnac3	36.4019	0.225888	0.570217	0.999466
ENSMUSG00000074884.12	Serf2	427.321	0.225882	0.267153	0.999466
ENSMUSG00000039936.18	Pik3cd	341.873	0.225746	0.594632	0.999466
ENSMUSG00000074212.7	Dnajb14	327.885	0.225672	0.367173	0.999466
ENSMUSG00000001281.9	Itgb7	203.618	0.225622	0.564793	0.999466
ENSMUSG00000026687.14	Aldh9a1	634.314	0.225586	0.368462	0.999466
ENSMUSG00000079012.11	Serpina3m	129.352	0.225312	0.561129	0.999466
ENSMUSG00000043833.6	2900005J15Rik	53.8948	0.225309	0.415332	0.999466
ENSMUSG00000020435.17	Osbp2	36.9083	0.225198	0.49156	0.999466
ENSMUSG00000074813.12	Gm14005	567.545	0.225157	0.372453	0.999466
ENSMUSG00000030255.13	Sspn	1094.32	0.225147	0.57849	0.999466
ENSMUSG00000030780.15	BC017158	82.5091	0.225113	0.523664	0.999466
ENSMUSG00000028965.13	Tnfrsf9	1303.54	0.225036	0.592124	0.999466
ENSMUSG00000028339.17	Col15a1	2184.72	0.224948	0.551084	0.999466
ENSMUSG00000066152.11	Slc31a2	1191.5	0.224912	0.352039	0.999466
ENSMUSG00000021665.7	Hexb	1447.91	0.224909	0.290041	0.999466
ENSMUSG00000012428.9	Steap4	4146	0.224875	0.539791	0.999466
ENSMUSG00000051615.13	Rap2a	495.704	0.224867	0.461896	0.999466
ENSMUSG00000032263.14	Bckdhb	290.478	0.224844	0.562093	0.999466
ENSMUSG00000044770.14	Scml4	581.735	0.224841	0.490628	0.999466
ENSMUSG00000059923.13	Grb2	589.526	0.224727	0.384346	0.999466
ENSMUSG00000006281.7	Tep1	565.491	0.224683	0.458215	0.999466
ENSMUSG00000000355.13	Mcts1	724.275	0.224633	0.236399	0.999466
ENSMUSG00000068141.5	Gm10232	57.6241	0.224607	0.419463	0.999466
ENSMUSG00000059146.12	Ntrk3	25.5286	0.224265	0.524581	0.999466
ENSMUSG00000074811.2	Hps6	40.2246	0.224083	0.59361	0.999466
ENSMUSG00000040520.7	Manea	291.725	0.223785	0.546381	0.999466
ENSMUSG00000083046.1	Gm14699	37.8373	0.223775	0.574286	0.999466
ENSMUSG00000042129.8	Rassf4	584.405	0.223734	0.595838	0.999466
ENSMUSG00000022801.13	Lrch3	461.54	0.223649	0.413059	0.999466
ENSMUSG00000054675.5	Tmem119	1860.28	0.223625	0.502223	0.999466
ENSMUSG00000028643.10	Svbp	637.939	0.223402	0.347046	0.999466
ENSMUSG00000032598.8	Nckipsd	184.159	0.223339	0.545034	0.999466
ENSMUSG00000024300.16	Myo1f	1502.21	0.22333	0.59937	0.999466
ENSMUSG00000026031.15	Cflar	1536.75	0.223298	0.31806	0.999466
ENSMUSG00000074519.11	Zfp971	49.1232	0.223292	0.469025	0.999466
ENSMUSG00000033439.12	Trmt13	163.152	0.223069	0.228742	0.999466
ENSMUSG00000025776.13	Crispld1	942.278	0.223064	0.587404	0.999466
ENSMUSG00000097164.1	Cep83os	118.485	0.223006	0.505927	0.999466
ENSMUSG00000030223.14	Ptpro	220.628	0.222956	0.599176	0.999466
ENSMUSG00000058073.4	Gm11189	25.7277	0.222801	0.509803	0.999466
ENSMUSG00000019528.18	Gyg	1391.67	0.222795	0.377007	0.999466
ENSMUSG00000036473.15	Tbc1d24	165.454	0.222793	0.443479	0.999466
ENSMUSG00000075705.12	Msrb1	626.05	0.222685	0.281664	0.999466
ENSMUSG00000041801.5	Phlda3	186.134	0.222614	0.559996	0.999466
ENSMUSG00000044548.11	Dact1	296.459	0.222599	0.595955	0.999466
ENSMUSG00000031207.16	Msn	5838.42	0.222502	0.401392	0.999466
ENSMUSG00000026426.10	Arl8a	283.09	0.222468	0.305553	0.999466
ENSMUSG00000000682.7	Cd52	690.708	0.222436	0.420127	0.999466
ENSMUSG00000003955.7	Fam162a	619.38	0.222363	0.436086	0.999466
ENSMUSG00000084025.1	Gm6276	36.8004	0.222244	0.590579	0.999466
ENSMUSG00000102982.1	Gm38319	53.6168	0.222075	0.499009	0.999466
ENSMUSG00000002781.17	Tmem143	108.816	0.222031	0.417756	0.999466
ENSMUSG00000050947.9	Amigo1	76.8174	0.221995	0.583468	0.999466
ENSMUSG00000029379.10	Cxcl3	461.537	0.221976	0.601525	0.999466
ENSMUSG00000006678.6	Pola1	173.85	0.221973	0.524563	0.999466
ENSMUSG00000015536.14	Mocs2	1392.7	0.221798	0.320092	0.999466
ENSMUSG00000097154.2	Gm26510	36.2307	0.22174	0.598548	0.999466
ENSMUSG00000024397.14	Aif1	601.876	0.221593	0.568236	0.999466
ENSMUSG00000052033.13	Pfdn4	320.253	0.221544	0.310576	0.999466
ENSMUSG00000030256.11	Bhlhe41	1880.51	0.221405	0.353856	0.999466
ENSMUSG00000042408.13	Zmym6	271.408	0.221283	0.18714	0.999466
ENSMUSG00000003581.14	Rnf215	111.643	0.221182	0.420974	0.999466
ENSMUSG00000039318.12	Rab3gap2	671.307	0.221169	0.389403	0.999466
ENSMUSG00000100437.1	Gm29152	25.782	0.221017	0.601197	0.999466
ENSMUSG00000035891.16	Cerk	276.402	0.220976	0.45417	0.999466
ENSMUSG00000044827.10	Tlr1	92.9318	0.220951	0.60044	0.999466
ENSMUSG00000021298.7	Gpr132	151.364	0.220943	0.603095	0.999466
ENSMUSG00000022967.12	Ifnar1	1451.39	0.220907	0.370791	0.999466
ENSMUSG00000046463.4	5930403N24Rik	107.497	0.220792	0.601912	0.999466
ENSMUSG00000029659.16	Medag	929.792	0.220785	0.564176	0.999466
ENSMUSG00000033192.4	Lpcat2	441.269	0.220751	0.601902	0.999466
ENSMUSG00000035493.9	Tgfbi	3424.68	0.220616	0.43432	0.999466
ENSMUSG00000028385.14	Snx30	173.311	0.220538	0.554019	0.999466
ENSMUSG00000096433.1	Zfp994	133.933	0.220458	0.523404	0.999466
ENSMUSG00000039911.13	Spsb1	565.168	0.220359	0.271195	0.999466
ENSMUSG00000001376.17	Vps50	570.621	0.219926	0.248643	0.999466
ENSMUSG00000023075.9	Akirin1	82.6397	0.219913	0.41873	0.999466
ENSMUSG00000003134.10	Tbc1d8	176.426	0.21985	0.533905	0.999466
ENSMUSG00000049232.3	Tigd2	199.721	0.219716	0.462031	0.999466
ENSMUSG00000074793.10	Hspa12b	286.737	0.219054	0.570959	0.999466
ENSMUSG00000040888.9	Gfer	41.6419	0.219004	0.473748	0.999466
ENSMUSG00000041798.15	Gck	88.2897	0.218786	0.606674	0.999466
ENSMUSG00000026430.15	Rassf5	339.025	0.218715	0.572678	0.999466
ENSMUSG00000082145.1	Gm12312	125.398	0.218684	0.410556	0.999466
ENSMUSG00000000402.2	Egfl6	75.8615	0.218589	0.58667	0.999466
ENSMUSG00000072115.10	Ang	463.477	0.21851	0.501982	0.999466
ENSMUSG00000035011.15	Zbtb7a	460.238	0.218428	0.150221	0.999466
ENSMUSG00000023885.8	Thbs2	8073.42	0.218355	0.491083	0.999466
ENSMUSG00000031875.6	Cmtm3	2089.86	0.218297	0.476017	0.999466
ENSMUSG00000002396.8	Ocel1	25.9957	0.218086	0.559102	0.999466
ENSMUSG00000064090.14	Vrk2	255.019	0.218026	0.327469	0.999466
ENSMUSG00000048120.16	Entpd1	975.255	0.217864	0.487469	0.999466
ENSMUSG00000051212.7	Gpr183	289.419	0.217795	0.608459	0.999466
ENSMUSG00000030268.17	Bcat1	1294.6	0.217784	0.544046	0.999466
ENSMUSG00000052146.15	Rps10	56.0097	0.217779	0.452721	0.999466
ENSMUSG00000060477.14	Irak2	590.005	0.21777	0.587677	0.999466
ENSMUSG00000068874.13	Selenbp1	661.085	0.217766	0.384403	0.999466
ENSMUSG00000068329.12	Htra2	541.548	0.217721	0.359942	0.999466
ENSMUSG00000047412.15	Zbtb44	265.523	0.217716	0.214473	0.999466
ENSMUSG00000055150.14	Zfp78	35.8175	0.217672	0.59042	0.999466
ENSMUSG00000026288.14	Inpp5d	755.953	0.217026	0.60973	0.999466
ENSMUSG00000057110.15	Cntrl	758.932	0.216976	0.252964	0.999466
ENSMUSG00000026544.6	Dusp23	287.655	0.216952	0.525977	0.999466
ENSMUSG00000008496.18	Pou2f2	86.1274	0.216832	0.609072	0.999466
ENSMUSG00000018819.10	Lsp1	2988.12	0.216732	0.428377	0.999466
ENSMUSG00000055024.12	Ep300	266.36	0.216722	0.468494	0.999466
ENSMUSG00000035834.11	Polr3g	63.6727	0.216709	0.534502	0.999466
ENSMUSG00000010476.13	Ebf3	127.63	0.216603	0.608264	0.999466
ENSMUSG00000046841.4	Ckap4	1441	0.216521	0.463142	0.999466
ENSMUSG00000041777.11	Cir1	39.3567	0.216514	0.486677	0.999466
ENSMUSG00000043895.5	S1pr2	1079.85	0.216323	0.507552	0.999466
ENSMUSG00000086229.3	Gm4887	125.881	0.216303	0.339898	0.999466
ENSMUSG00000052459.13	Atp6v1a	2705.93	0.216256	0.474617	0.999466
ENSMUSG00000024644.16	Cndp2	2501.76	0.215819	0.355726	0.999466
ENSMUSG00000021958.4	Pinx1	261.336	0.2158	0.39417	0.999466
ENSMUSG00000074218.2	Cox7a1	45.7962	0.215748	0.557508	0.999466
ENSMUSG00000036894.3	Rap2b	1042.56	0.215652	0.394443	0.999466
ENSMUSG00000024854.3	Pold4	633.528	0.215614	0.278429	0.999466
ENSMUSG00000031101.6	Sash3	267.796	0.21558	0.611824	0.999466
ENSMUSG00000048163.13	Selplg	543.247	0.215462	0.608539	0.999466
ENSMUSG00000025192.13	Entpd7	698.96	0.215387	0.45285	0.999466
ENSMUSG00000063698.9	Sfxn4	100.241	0.215378	0.558765	0.999466
ENSMUSG00000021388.13	Aspn	3171.95	0.215149	0.567561	0.999466
ENSMUSG00000031246.14	Sh3bgrl	3188.87	0.215137	0.379736	0.999466
ENSMUSG00000032015.15	Pou2f3	29.9195	0.215115	0.607795	0.999466
ENSMUSG00000018736.14	Ndel1	1605.37	0.215009	0.356049	0.999466
ENSMUSG00000066684.10	Pilrb1	86.7902	0.21496	0.612037	0.999466
ENSMUSG00000047238.4	Mageh1	657.555	0.214922	0.565064	0.999466
ENSMUSG00000039431.16	Mtmr7	68.2294	0.214749	0.61217	0.999466
ENSMUSG00000106375.1	Gm43361	163.919	0.214675	0.435945	0.999466
ENSMUSG00000029569.9	Tmem168	859.909	0.214573	0.414559	0.999466
ENSMUSG00000034278.3	Dnajc17	64.872	0.21453	0.453868	0.999466
ENSMUSG00000042293.7	Gm5617	182.666	0.214351	0.357109	0.999466
ENSMUSG00000042198.12	Chchd7	233.923	0.214343	0.339919	0.999466
ENSMUSG00000030148.15	Clec4a2	325.141	0.214311	0.614157	0.999466
ENSMUSG00000040522.5	Tlr8	67.338	0.214137	0.599348	0.999466
ENSMUSG00000028645.10	Slc2a1	2559.2	0.214098	0.535251	0.999466
ENSMUSG00000006442.10	Srm	247.289	0.214076	0.456602	0.999466
ENSMUSG00000057191.13	AB124611	324.509	0.21402	0.614557	0.999466
ENSMUSG00000021130.7	Galnt16	1400.36	0.213997	0.592882	0.999466
ENSMUSG00000095362.7	Gm14325	56.8696	0.213916	0.516063	0.999466
ENSMUSG00000022124.14	Fbxl3	367.804	0.213857	0.404007	0.999466
ENSMUSG00000069237.8	Fam8a1	250.928	0.213828	0.520009	0.999466
ENSMUSG00000104917.1	Gm43289	279.902	0.213824	0.594232	0.999466
ENSMUSG00000063268.12	Parp10	883.28	0.213809	0.4536	0.999466
ENSMUSG00000026177.11	Slc11a1	1441.22	0.21378	0.612658	0.999466
ENSMUSG00000029061.2	Mmp23	1427.67	0.213627	0.544695	0.999466
ENSMUSG00000067189.5	Gm7335	66.1802	0.213546	0.450136	0.999466
ENSMUSG00000042834.14	Nrep	2458.59	0.213432	0.569974	0.999466
ENSMUSG00000104491.1	Gm32340	65.9631	0.213386	0.459074	0.999466
ENSMUSG00000050786.8	Ccdc126	263.991	0.21328	0.500643	0.999466
ENSMUSG00000021643.14	Serf1	297.61	0.213268	0.310627	0.999466
ENSMUSG00000036896.5	C1qc	1038.47	0.213254	0.592159	0.999466
ENSMUSG00000054555.11	Adam12	190.348	0.21321	0.540217	0.999466
ENSMUSG00000006219.12	Fblim1	1188.89	0.212936	0.568846	0.999466
ENSMUSG00000034664.13	Itga2b	406.621	0.21284	0.581317	0.999466
ENSMUSG00000032540.15	Abhd5	808.547	0.21278	0.519029	0.999466
ENSMUSG00000021891.7	Mettl6	419.561	0.212728	0.273886	0.999466
ENSMUSG00000034987.3	Hrh2	72.1048	0.212694	0.616476	0.999466
ENSMUSG00000073791.11	Efcab7	66.5795	0.212618	0.586888	0.999466
ENSMUSG00000031904.4	Slc7a6	976.743	0.212526	0.477517	0.999466
ENSMUSG00000106472.1	Gm43111	36.5708	0.212487	0.605336	0.999466
ENSMUSG00000037185.8	Krt80	288.509	0.212479	0.558392	0.999466
ENSMUSG00000028344.12	Invs	117.178	0.212472	0.351668	0.999466
ENSMUSG00000091243.1	Vgll3	528.313	0.212465	0.599147	0.999466
ENSMUSG00000030036.8	Mogs	175.154	0.212393	0.405245	0.999466
ENSMUSG00000082070.1	Gm1866	43.2734	0.212265	0.461631	0.999466
ENSMUSG00000030707.15	Coro1a	1483.28	0.212256	0.592645	0.999466
ENSMUSG00000028068.14	Iqgap3	345.84	0.212134	0.603821	0.999466
ENSMUSG00000103585.1	Pcdhgb4	41.9304	0.212089	0.549029	0.999466
ENSMUSG00000071547.3	Nt5dc2	74.9996	0.211994	0.577727	0.999466
ENSMUSG00000016756.16	Cmah	1827.46	0.211987	0.586404	0.999466
ENSMUSG00000028212.16	Ccne2	137.169	0.211639	0.382365	0.999466
ENSMUSG00000037174.18	Elf2	556.763	0.211405	0.321622	0.999466
ENSMUSG00000067629.10	Syngap1	51.9224	0.211268	0.594741	0.999466
ENSMUSG00000058715.11	Fcer1g	982.408	0.210896	0.292768	0.999466
ENSMUSG00000002111.8	Spi1	95.1844	0.210865	0.618928	0.999466
ENSMUSG00000028708.16	Mknk1	792.26	0.210709	0.355384	0.999466
ENSMUSG00000039005.13	Tlr4	716.902	0.210672	0.468033	0.999466
ENSMUSG00000021188.14	Trip11	1256.51	0.21054	0.301415	0.999466
ENSMUSG00000052137.11	Rbm12b2	143.269	0.210482	0.389671	0.999466
ENSMUSG00000015961.8	Adss	649.731	0.210337	0.220659	0.999466
ENSMUSG00000039697.15	Ncoa7	509.727	0.210238	0.409671	0.999466
ENSMUSG00000021360.15	Gcnt2	346.208	0.210209	0.619425	0.999466
ENSMUSG00000047804.15	Akap10	146.049	0.210018	0.541969	0.999466
ENSMUSG00000025450.4	Gm9752	163.024	0.209988	0.415106	0.999466
ENSMUSG00000024725.12	Ostf1	1306.64	0.209965	0.405244	0.999466
ENSMUSG00000003812.13	Dnase2a	750.679	0.209956	0.318485	0.999466
ENSMUSG00000038372.13	Gmds	245.498	0.2099	0.44999	0.999466
ENSMUSG00000104339.1	C130089K02Rik	208.741	0.209658	0.445445	0.999466
ENSMUSG00000028641.16	P3h1	516.716	0.209638	0.580809	0.999466
ENSMUSG00000027330.16	Cdc25b	402.195	0.209631	0.405977	0.999466
ENSMUSG00000024982.9	Zdhhc6	528.002	0.209425	0.377616	0.999466
ENSMUSG00000108456.1	4732496C06Rik	262.594	0.209357	0.605573	0.999466
ENSMUSG00000029761.16	Cald1	4308.78	0.20927	0.542193	0.999466
ENSMUSG00000027737.10	Slc7a11	497.863	0.209257	0.621806	0.999466
ENSMUSG00000036181.2	Hist1h1c	747.499	0.209126	0.367709	0.999466
ENSMUSG00000034560.5	Washc4	856.038	0.209078	0.31134	0.999466
ENSMUSG00000038793.8	Lefty1	203.669	0.209068	0.594896	0.999466
ENSMUSG00000038178.16	Slc43a2	490.554	0.208959	0.622109	0.999466
ENSMUSG00000017677.11	Wsb1	1637.75	0.208788	0.386718	0.999466
ENSMUSG00000040710.10	St8sia4	235.142	0.20854	0.623559	0.999466
ENSMUSG00000027339.15	Rassf2	1418.83	0.20852	0.573286	0.999466
ENSMUSG00000064317.4	Gm10146	67.874	0.208497	0.401723	0.999466
ENSMUSG00000097443.1	Gm17529	45.1944	0.208457	0.536424	0.999466
ENSMUSG00000078566.8	Bnip3	838.807	0.208223	0.27086	0.999466
ENSMUSG00000023915.4	Tnfrsf21	193.053	0.208186	0.569446	0.999466
ENSMUSG00000029338.13	Antxr2	2249.01	0.208108	0.616486	0.999466
ENSMUSG00000066554.6	Gm10167	102.208	0.208058	0.534992	0.999466
ENSMUSG00000032577.16	Mapkapk3	388.862	0.208023	0.590702	0.999466
ENSMUSG00000028780.13	Sema3c	4033.3	0.207985	0.608609	0.999466
ENSMUSG00000056153.14	Socs6	324.693	0.207928	0.278257	0.999466
ENSMUSG00000039126.9	Prune2	662.283	0.207663	0.6192	0.999466
ENSMUSG00000027676.11	Ccdc39	50.9079	0.207656	0.558629	0.999466
ENSMUSG00000073468.11	Sft2d1	128.824	0.207347	0.491879	0.999466
ENSMUSG00000030303.15	Far2	37.9442	0.207342	0.598084	0.999466
ENSMUSG00000030815.11	Phkg2	412.605	0.207164	0.326856	0.999466
ENSMUSG00000102224.5	4930447F24Rik	352.671	0.206953	0.616243	0.999466
ENSMUSG00000021596.16	Mctp1	268.285	0.206773	0.621767	0.999466
ENSMUSG00000060090.16	Rp2	676.293	0.206703	0.35479	0.999466
ENSMUSG00000019975.11	Ikbip	1704.67	0.206634	0.560895	0.999466
ENSMUSG00000001240.13	Ramp2	345.744	0.206592	0.588132	0.999466
ENSMUSG00000071141.7	Rpl36a-ps3	30.0993	0.206577	0.497497	0.999466
ENSMUSG00000024952.12	Rps6ka4	386.261	0.206496	0.400552	0.999466
ENSMUSG00000023043.6	Krt18	1969.89	0.206415	0.580629	0.999466
ENSMUSG00000034675.17	Dbn1	1749	0.206358	0.511508	0.999466
ENSMUSG00000039983.13	Ccdc32	508.368	0.20614	0.521141	0.999466
ENSMUSG00000026958.13	Dpp7	1085.2	0.206139	0.492601	0.999466
ENSMUSG00000053964.16	Lgals4	403.59	0.206107	0.540935	0.999466
ENSMUSG00000027805.16	Pfn2	403.815	0.206087	0.583077	0.999466
ENSMUSG00000089942.9	Pira2	36.2989	0.205898	0.614853	0.999466
ENSMUSG00000079036.10	Alkbh1	399.327	0.205836	0.256962	0.999466
ENSMUSG00000029675.12	Eln	1781.92	0.205814	0.560213	0.999466
ENSMUSG00000020264.5	Slc36a2	313.257	0.205737	0.616921	0.999466
ENSMUSG00000008333.12	Snrpb2	608.568	0.205689	0.170966	0.999466
ENSMUSG00000031644.18	Nek1	411.781	0.205617	0.423079	0.999466
ENSMUSG00000021621.15	Zcchc9	540.273	0.205508	0.397399	0.999466
ENSMUSG00000090084.7	Srpx	2067.92	0.2055	0.586259	0.999466
ENSMUSG00000087370.2	Tmem170b	1056.38	0.205442	0.557682	0.999466
ENSMUSG00000086688.4	Gm11560	60.0639	0.205415	0.412378	0.999466
ENSMUSG00000002732.14	Fkbp7	1198.93	0.205348	0.516927	0.999466
ENSMUSG00000026005.15	Rpe	794.867	0.205312	0.398579	0.999466
ENSMUSG00000004267.16	Eno2	335.459	0.204969	0.569138	0.999466
ENSMUSG00000070705.2	Eid2b	25.0614	0.204948	0.572561	0.999466
ENSMUSG00000038175.9	Mylip	622.301	0.204803	0.370197	0.999466
ENSMUSG00000030117.5	Gdf3	219.219	0.204795	0.629304	0.999466
ENSMUSG00000022841.14	Ap2m1	548.029	0.204787	0.33109	0.999466
ENSMUSG00000028995.14	Fam126a	345.639	0.204715	0.595482	0.999466
ENSMUSG00000071350.12	Setdb2	170.868	0.204708	0.53208	0.999466
ENSMUSG00000027995.10	Tlr2	1248.27	0.204686	0.60516	0.999466
ENSMUSG00000034620.17	Tmem5	384.814	0.204591	0.547362	0.999466
ENSMUSG00000021457.14	Syk	1458.82	0.20453	0.412788	0.999466
ENSMUSG00000046808.17	Atp10d	65.2606	0.204517	0.602329	0.999466
ENSMUSG00000002068.16	Ccne1	35.3454	0.204491	0.598004	0.999466
ENSMUSG00000104918.1	Gm42944	25.3132	0.204456	0.622186	0.999466
ENSMUSG00000027966.19	Col11a1	158.244	0.204428	0.630336	0.999466
ENSMUSG00000020137.4	Thap2	144.861	0.204303	0.428852	0.999466
ENSMUSG00000058569.7	Tmed9	2397.17	0.204128	0.105527	0.999466
ENSMUSG00000021549.13	Rasa1	766.249	0.204114	0.463537	0.999466
ENSMUSG00000039929.14	Urb1	86.5232	0.204096	0.555775	0.999466
ENSMUSG00000022217.14	Emc9	235.794	0.20388	0.458207	0.999466
ENSMUSG00000026357.3	Rgs18	65.2812	0.203878	0.624001	0.999466
ENSMUSG00000070394.10	Tmem256	649.18	0.203804	0.123511	0.999466
ENSMUSG00000026930.15	Gpsm1	194.798	0.203774	0.563586	0.999466
ENSMUSG00000030126.17	Tmcc1	369.835	0.203774	0.499533	0.999466
ENSMUSG00000039109.15	F13a1	2055.16	0.203745	0.631777	0.999466
ENSMUSG00000078878.9	Gm14305	31.2044	0.203733	0.593127	0.999466
ENSMUSG00000051486.5	Pcdhb11	47.4398	0.203622	0.622156	0.999466
ENSMUSG00000020994.4	Pnn	1444.6	0.203558	0.2186	0.999466
ENSMUSG00000042737.9	Dpm3	452.008	0.203475	0.241789	0.999466
ENSMUSG00000017400.10	Stac2	348.626	0.203463	0.547638	0.999466
ENSMUSG00000097056.1	Gm4262	30.7964	0.203444	0.604669	0.999466
ENSMUSG00000025867.8	Cplx2	84.5945	0.203374	0.618408	0.999466
ENSMUSG00000020572.7	Nampt	1263.51	0.203348	0.481999	0.999466
ENSMUSG00000050549.8	5730508B09Rik	33.0179	0.203304	0.629966	0.999466
ENSMUSG00000030499.9	Kctd15	72.0488	0.203261	0.575248	0.999466
ENSMUSG00000031156.17	Slc35a2	876.234	0.20308	0.431544	0.999466
ENSMUSG00000046006.5	Gapt	52.3686	0.202996	0.632779	0.999466
ENSMUSG00000038349.10	Plcl1	44.5177	0.202954	0.614466	0.999466
ENSMUSG00000079363.7	Gbp4	123.467	0.202865	0.587142	0.999466
ENSMUSG00000017002.14	Slpi	601.514	0.202747	0.621503	0.999466
ENSMUSG00000001750.15	Tcirg1	1952.22	0.20257	0.545242	0.999466
ENSMUSG00000026812.16	Tsc1	350.459	0.202509	0.287317	0.999466
ENSMUSG00000028826.14	Tmem57	309.376	0.202491	0.343413	0.999466
ENSMUSG00000029581.14	Fscn1	352.394	0.202489	0.55618	0.999466
ENSMUSG00000022534.13	Mefv	101.451	0.202425	0.633994	0.999466
ENSMUSG00000027750.16	Postn	5715.54	0.2024	0.442678	0.999466
ENSMUSG00000103034.1	Gm8797	31.8857	0.202337	0.541708	0.999466
ENSMUSG00000027219.13	Slc28a2	67.4426	0.202331	0.63026	0.999466
ENSMUSG00000079427.10	Mthfsl	116.679	0.202239	0.453367	0.999466
ENSMUSG00000001576.14	Ergic1	2457.44	0.201995	0.405013	0.999466
ENSMUSG00000036256.13	Igfbp7	594.74	0.201838	0.574119	0.999466
ENSMUSG00000021423.5	Ly86	802.028	0.201788	0.616116	0.999466
ENSMUSG00000090919.6	Pabpc4l	184.822	0.201759	0.631767	0.999466
ENSMUSG00000040242.14	Fgfr1op2	1064.68	0.201623	0.46292	0.999466
ENSMUSG00000039195.4	1110008P14Rik	282.622	0.201437	0.373685	0.999466
ENSMUSG00000106392.1	Gm5870	49.574	0.201424	0.435233	0.999466
ENSMUSG00000048388.3	Fam171b	283.736	0.201262	0.634329	0.999466
ENSMUSG00000051736.8	Fam229b	85.2001	0.201258	0.539873	0.999466
ENSMUSG00000020077.14	Srgn	1618.69	0.201211	0.296657	0.999466
ENSMUSG00000028268.14	Gbp3	907.296	0.201161	0.620212	0.999466
ENSMUSG00000036192.15	Rorb	576.949	0.201106	0.610774	0.999466
ENSMUSG00000071180.4	Smim15	990.53	0.201101	0.50441	0.999466
ENSMUSG00000106246.1	Gm18867	25.3089	0.201093	0.591384	0.999466
ENSMUSG00000034656.16	Cacna1a	80.0302	0.201034	0.630514	0.999466
ENSMUSG00000090704.1	Trp53-ps	38.6303	0.201031	0.573928	0.999466
ENSMUSG00000021040.15	Slirp	361.83	0.200982	0.227497	0.999466
ENSMUSG00000025245.13	Lztfl1	348.238	0.200976	0.533235	0.999466
ENSMUSG00000023349.14	Clec4n	866.912	0.20095	0.626608	0.999466
ENSMUSG00000061353.11	Cxcl12	3164.96	0.200888	0.506826	0.999466
ENSMUSG00000040370.13	Etfrf1	469.761	0.200834	0.383501	0.999466
ENSMUSG00000050022.16	Amz1	189.649	0.200816	0.632057	0.999466
ENSMUSG00000073647.3	Gm10557	137.298	0.200739	0.402717	0.999466
ENSMUSG00000028041.17	Adam15	362.213	0.200648	0.517021	0.999466
ENSMUSG00000034071.14	Zfp551	50.87	0.200633	0.608036	0.999466
ENSMUSG00000011958.17	Bnip2	988.321	0.200569	0.480986	0.999466
ENSMUSG00000075289.4	Carns1	56.1529	0.200562	0.46994	0.999466
ENSMUSG00000026271.15	Gpr35	811.11	0.200541	0.632978	0.999466
ENSMUSG00000026171.12	Rnf25	497.645	0.200506	0.254069	0.999466
ENSMUSG00000031502.9	Col4a1	3990.02	0.200467	0.573579	0.999466
ENSMUSG00000029576.17	Radil	283.515	0.200451	0.625487	0.999466
ENSMUSG00000031548.7	Sfrp1	1317.51	0.200358	0.625513	0.999466
ENSMUSG00000026222.16	Sp100	2073.23	0.200322	0.580585	0.999466
ENSMUSG00000108621.1	Gm37494	343.554	0.200251	0.486189	0.999466
ENSMUSG00000019932.7	Kera	84.5859	0.200206	0.633971	0.999466
ENSMUSG00000025370.6	Cdh9	244.004	0.200204	0.628501	0.999466
ENSMUSG00000030615.11	Tmem126a	495.429	0.199995	0.318658	0.999466
ENSMUSG00000021692.8	Dimt1	112.121	0.199984	0.498745	0.999466
ENSMUSG00000097335.1	Gm26563	32.1887	0.199982	0.617333	0.999466
ENSMUSG00000028541.14	B4galt2	286.588	0.199915	0.597212	0.999466
ENSMUSG00000038900.17	Rpl12	109.461	0.199887	0.510223	0.999466
ENSMUSG00000030657.11	Xylt1	244.397	0.199711	0.568029	0.999466
ENSMUSG00000020212.13	Mdm1	164.359	0.199704	0.527	0.999466
ENSMUSG00000028744.15	Pqlc2	423.246	0.199618	0.387292	0.999466
ENSMUSG00000087497.7	2810001G20Rik	64.8758	0.199569	0.54186	0.999466
ENSMUSG00000006611.14	Hfe	843.132	0.199415	0.466063	0.999466
ENSMUSG00000047557.2	Lxn	803.995	0.199387	0.480112	0.999466
ENSMUSG00000079057.3	Cyp4v3	633.897	0.199363	0.528508	0.999466
ENSMUSG00000049130.5	C5ar1	1937.46	0.199316	0.620662	0.999466
ENSMUSG00000081010.3	Gm13880	37.7144	0.199255	0.529616	0.999466
ENSMUSG00000021143.9	Pacs2	303.599	0.199224	0.422788	0.999466
ENSMUSG00000060568.14	Fam78b	67.0606	0.199188	0.606427	0.999466
ENSMUSG00000036918.15	Ttc7	128.857	0.199156	0.494346	0.999466
ENSMUSG00000002635.11	Pdcd2l	313.988	0.199094	0.465693	0.999466
ENSMUSG00000028465.16	Tln1	2679.69	0.199072	0.442943	0.999466
ENSMUSG00000022676.6	Snai2	546.468	0.199063	0.63277	0.999466
ENSMUSG00000036887.5	C1qa	1162.79	0.199005	0.604383	0.999466
ENSMUSG00000103591.1	Gm38365	95.0947	0.198964	0.601904	0.999466
ENSMUSG00000001211.14	Agpat3	484.782	0.198927	0.373982	0.999466
ENSMUSG00000066800.11	Rnasel	433.675	0.198871	0.48699	0.999466
ENSMUSG00000021969.7	Zdhhc20	2162.17	0.198855	0.52243	0.999466
ENSMUSG00000064061.13	Dzip3	100.433	0.198848	0.455994	0.999466
ENSMUSG00000022634.9	Yaf2	461.965	0.198837	0.419115	0.999466
ENSMUSG00000032085.4	Tagln	890.341	0.198788	0.617886	0.999466
ENSMUSG00000051439.6	Cd14	2413.57	0.198736	0.387566	0.999466
ENSMUSG00000029392.12	Rilpl1	219.465	0.198671	0.430788	0.999466
ENSMUSG00000032300.6	1700017B05Rik	760.166	0.198603	0.60685	0.999466
ENSMUSG00000022957.19	Itsn1	603.482	0.198594	0.533769	0.999466
ENSMUSG00000029299.14	Abcg3	54.8595	0.198431	0.640279	0.999466
ENSMUSG00000083854.3	Dnajc19-ps	295.738	0.198284	0.255357	0.999466
ENSMUSG00000028251.5	Tstd3	212.187	0.198189	0.615074	0.999466
ENSMUSG00000037613.15	Tnfrsf23	507.394	0.198105	0.494023	0.999466
ENSMUSG00000046949.15	Nqo2	1008.13	0.198066	0.590206	0.999466
ENSMUSG00000022913.14	Psmg1	206.079	0.198056	0.316388	0.999466
ENSMUSG00000047330.8	Kcne4	358.247	0.198016	0.632404	0.999466
ENSMUSG00000027387.11	Zc3h8	131.726	0.197897	0.4735	0.999466
ENSMUSG00000027423.15	Snx5	1730.93	0.197896	0.464251	0.999466
ENSMUSG00000023959.8	Clic5	27.3276	0.197886	0.637543	0.999466
ENSMUSG00000029126.7	Nsg1	1458.65	0.197882	0.550713	0.999466
ENSMUSG00000105655.1	Gm42659	198.626	0.19785	0.365704	0.999466
ENSMUSG00000001555.10	Fkbp10	2945.2	0.197822	0.535104	0.999466
ENSMUSG00000008668.14	Rps18	257.184	0.197793	0.477644	0.999466
ENSMUSG00000037295.7	Ldlrap1	299.403	0.197563	0.514339	0.999466
ENSMUSG00000071281.10	Zfp65	100.067	0.197474	0.515574	0.999466
ENSMUSG00000079038.2	D130040H23Rik	56.3585	0.197423	0.476821	0.999466
ENSMUSG00000028167.15	Bdh2	430.123	0.197182	0.632231	0.999466
ENSMUSG00000038156.15	Spon1	4833.98	0.197135	0.584157	0.999466
ENSMUSG00000025199.16	Chuk	299.26	0.197116	0.36622	0.999466
ENSMUSG00000082908.4	Gm13736	130.912	0.197014	0.354106	0.999466
ENSMUSG00000012422.14	Tmem167	1759.14	0.196975	0.46406	0.999466
ENSMUSG00000028648.13	Ndufs5	120.991	0.196948	0.329231	0.999466
ENSMUSG00000000693.10	Loxl3	3099.59	0.196886	0.572168	0.999466
ENSMUSG00000004730.14	Adgre1	1993.97	0.196875	0.639352	0.999466
ENSMUSG00000004371.14	Il11	51.2342	0.19686	0.632347	0.999466
ENSMUSG00000027859.10	Ngf	172.641	0.196799	0.636039	0.999466
ENSMUSG00000090115.7	Usp49	25.8126	0.196756	0.541328	0.999466
ENSMUSG00000022378.13	Fam49b	241.076	0.196755	0.641477	0.999466
ENSMUSG00000019899.15	Lama2	3753.18	0.196738	0.61518	0.999466
ENSMUSG00000014361.5	Mertk	328.411	0.196678	0.63882	0.999466
ENSMUSG00000052336.6	Cx3cr1	1720.67	0.196604	0.643218	0.999466
ENSMUSG00000020160.18	Meis1	591.01	0.196595	0.633597	0.999466
ENSMUSG00000073555.1	Gm4951	380.308	0.196572	0.608328	0.999466
ENSMUSG00000097041.1	Pafah1b1-ps1	50.2376	0.19649	0.516184	0.999466
ENSMUSG00000067424.12	Zfp563	103.02	0.196396	0.415383	0.999466
ENSMUSG00000019872.13	Smpdl3a	1092.29	0.196366	0.551663	0.999466
ENSMUSG00000022754.5	Tmem45a	1674.23	0.19631	0.586836	0.999466
ENSMUSG00000034889.7	Cactin	53.0025	0.196059	0.514273	0.999466
ENSMUSG00000044730.15	9930104L06Rik	277.214	0.195999	0.512597	0.999466
ENSMUSG00000066687.4	Zbtb16	194.3	0.195892	0.644773	0.999466
ENSMUSG00000056941.17	Commd7	1109.52	0.195845	0.301495	0.999466
ENSMUSG00000056888.11	Glipr1	309.089	0.195817	0.636113	0.999466
ENSMUSG00000067925.4	Cxx1a	28.7356	0.195681	0.560479	0.999466
ENSMUSG00000030643.13	Rab30	516.807	0.195676	0.632718	0.999466
ENSMUSG00000074115.3	Saa1	104.27	0.195528	0.645586	0.999466
ENSMUSG00000020115.2	Tbk1	673.115	0.195423	0.43235	0.999466
ENSMUSG00000062846.7	Gm14176	99.8622	0.195414	0.346641	0.999466
ENSMUSG00000022095.9	Fam160b2	185.532	0.195307	0.443562	0.999466
ENSMUSG00000027276.7	Jag1	536.36	0.195302	0.402357	0.999466
ENSMUSG00000036905.8	C1qb	1804.57	0.195295	0.229744	0.999466
ENSMUSG00000032688.7	Malt1	145.937	0.195272	0.633503	0.999466
ENSMUSG00000036144.6	Meox2	667.215	0.195261	0.645026	0.999466
ENSMUSG00000026946.9	Nmi	545.731	0.195213	0.408333	0.999466
ENSMUSG00000057894.10	Zfp329	356.681	0.195154	0.370478	0.999466
ENSMUSG00000036273.15	Lrrk2	218.486	0.195051	0.617936	0.999466
ENSMUSG00000032712.16	2810474O19Rik	1743.63	0.19501	0.370791	0.999466
ENSMUSG00000097754.1	Ptgs2os2	36.2627	0.194977	0.630306	0.999466
ENSMUSG00000020946.13	Gosr2	2063.86	0.194942	0.505433	0.999466
ENSMUSG00000025287.15	Acot9	813.992	0.194845	0.5357	0.999466
ENSMUSG00000043391.9	2510009E07Rik	695.638	0.194813	0.523219	0.999466
ENSMUSG00000027828.12	Ssr3	4532.83	0.194761	0.420573	0.999466
ENSMUSG00000074064.6	Mlycd	93.4631	0.194752	0.542467	0.999466
ENSMUSG00000020241.13	Col6a2	4243.07	0.194743	0.585994	0.999466
ENSMUSG00000015341.16	Golga7	577.387	0.194685	0.300833	0.999466
ENSMUSG00000020823.16	Sec14l1	1469.27	0.194671	0.256457	0.999466
ENSMUSG00000098374.1	Gm28043	49.4781	0.194656	0.539793	0.999466
ENSMUSG00000066838.6	Zfp772	135.07	0.194509	0.504397	0.999466
ENSMUSG00000019944.14	Rhobtb1	44.3728	0.194502	0.608638	0.999466
ENSMUSG00000020057.2	Dram1	2268.15	0.194149	0.601805	0.999466
ENSMUSG00000043090.18	Zfp866	259.025	0.194098	0.302571	0.999466
ENSMUSG00000078995.9	Zfp456	25.6489	0.194046	0.603742	0.999466
ENSMUSG00000035678.7	Tnfsf9	838.109	0.193992	0.521813	0.999466
ENSMUSG00000042684.8	Npl	209.226	0.193795	0.63381	0.999466
ENSMUSG00000000957.9	Mmp14	2458.72	0.19375	0.505724	0.999466
ENSMUSG00000002617.14	Zfp40	146.079	0.193585	0.584576	0.999466
ENSMUSG00000024513.16	Mbd2	367.643	0.19347	0.418014	0.999466
ENSMUSG00000074780.1	Anapc15-ps	45.6498	0.193294	0.521758	0.999466
ENSMUSG00000007279.14	Scube2	41.2935	0.193173	0.6011	0.999466
ENSMUSG00000052727.5	Map1b	3160.82	0.193083	0.518432	0.999466
ENSMUSG00000104713.4	Gbp6	75.7715	0.193013	0.456983	0.999466
ENSMUSG00000004631.15	Sgce	1928.48	0.192517	0.607265	0.999466
ENSMUSG00000002699.12	Lcp2	824.253	0.192507	0.647661	0.999466
ENSMUSG00000022788.16	Fgd4	438.727	0.192443	0.341552	0.999466
ENSMUSG00000044349.15	Snhg11	1628.8	0.192421	0.420754	0.999466
ENSMUSG00000031239.5	Itm2a	2391.08	0.192351	0.578666	0.999466
ENSMUSG00000037148.7	Arhgap10	282.182	0.192292	0.610783	0.999466
ENSMUSG00000058420.7	Syt17	35.7283	0.192279	0.605572	0.999466
ENSMUSG00000027082.15	Tfpi	1183.49	0.192135	0.624517	0.999466
ENSMUSG00000026315.13	Serpinb8	221.39	0.192102	0.645176	0.999466
ENSMUSG00000061518.10	Cox5b	154.085	0.19195	0.33514	0.999466
ENSMUSG00000058748.8	Zfp958	176.791	0.191943	0.471773	0.999466
ENSMUSG00000024983.9	Vti1a	362.177	0.191856	0.312969	0.999466
ENSMUSG00000022629.16	Kif21a	157.5	0.191549	0.619926	0.999466
ENSMUSG00000022064.9	Pibf1	328.544	0.191504	0.485882	0.999466
ENSMUSG00000021326.11	Trim27	121.312	0.191357	0.418885	0.999466
ENSMUSG00000024270.11	Slc39a6	731.827	0.191336	0.531872	0.999466
ENSMUSG00000022545.13	Ercc4	334.236	0.191305	0.469274	0.999466
ENSMUSG00000028017.7	Egf	39.3771	0.191233	0.597275	0.999466
ENSMUSG00000011008.13	Mcoln2	866.096	0.191201	0.645291	0.999466
ENSMUSG00000055320.16	Tead1	511.162	0.191064	0.514889	0.999466
ENSMUSG00000022489.5	Pde1b	67.1401	0.190995	0.650541	0.999466
ENSMUSG00000024085.13	Man2a1	1426.14	0.190909	0.5695	0.999466
ENSMUSG00000030790.14	Adm	1955.33	0.190792	0.514477	0.999466
ENSMUSG00000021109.13	Hif1a	1177.31	0.190768	0.506729	0.999466
ENSMUSG00000020328.10	Nudcd2	818.569	0.190702	0.391114	0.999466
ENSMUSG00000046731.4	Kctd11	2570.22	0.190427	0.562971	0.999466
ENSMUSG00000037926.15	Ssh2	1374.97	0.190413	0.575894	0.999466
ENSMUSG00000017969.13	Ptgis	2027.07	0.19037	0.557049	0.999466
ENSMUSG00000035954.9	Dock4	72.899	0.190343	0.559449	0.999466
ENSMUSG00000021384.14	Susd3	353.024	0.190335	0.654342	0.999466
ENSMUSG00000055884.7	Fancm	50.568	0.190269	0.516145	0.999466
ENSMUSG00000032531.15	Amotl2	699.14	0.19021	0.556338	0.999466
ENSMUSG00000056481.6	Cd248	2406.05	0.19017	0.559853	0.999466
ENSMUSG00000104646.1	Gm9173	32.9187	0.190159	0.533829	0.999466
ENSMUSG00000045980.13	Tmem104	954.361	0.189982	0.564124	0.999466
ENSMUSG00000047777.9	Phf13	207.047	0.189956	0.522431	0.999466
ENSMUSG00000045210.8	Vcpip1	423.439	0.189933	0.294638	0.999466
ENSMUSG00000039841.14	Zfp800	253.031	0.189919	0.355304	0.999466
ENSMUSG00000070002.6	Ell	1337.26	0.189726	0.490399	0.999466
ENSMUSG00000052854.15	Nrk	39.3686	0.189687	0.650818	0.999466
ENSMUSG00000036002.12	Fam214b	157.621	0.189682	0.513815	0.999466
ENSMUSG00000024238.13	Zeb1	1941.28	0.189557	0.622792	0.999466
ENSMUSG00000029233.15	Srd5a3	210.888	0.18955	0.312163	0.999466
ENSMUSG00000042364.10	Snx18	1187.36	0.18952	0.466615	0.999466
ENSMUSG00000042254.14	Cilp	7529.61	0.189515	0.472363	0.999466
ENSMUSG00000094942.7	Gm3604	52.216	0.189449	0.615308	0.999466
ENSMUSG00000023008.18	Fmnl3	258.606	0.189376	0.608715	0.999466
ENSMUSG00000029377.5	Ereg	106.836	0.189272	0.652221	0.999466
ENSMUSG00000024642.16	Tle4	104.625	0.189263	0.556579	0.999466
ENSMUSG00000026655.14	Fam107b	539.629	0.189252	0.54529	0.999466
ENSMUSG00000031834.15	Pik3r2	415.857	0.189251	0.531561	0.999466
ENSMUSG00000018983.9	E2f2	88.4998	0.189111	0.614329	0.999466
ENSMUSG00000013483.14	Card14	68.5192	0.189098	0.656485	0.999466
ENSMUSG00000037060.2	Prkcdbp	379.881	0.189083	0.625686	0.999466
ENSMUSG00000028047.11	Thbs3	3338.84	0.189076	0.607245	0.999466
ENSMUSG00000035051.14	Dhx57	215.831	0.189067	0.344499	0.999466
ENSMUSG00000027854.12	Sike1	280.646	0.189037	0.472489	0.999466
ENSMUSG00000073643.11	Wdfy1	531.757	0.188884	0.448977	0.999466
ENSMUSG00000020630.8	Rnaseh1	349.686	0.188828	0.403762	0.999466
ENSMUSG00000033871.14	Ppargc1b	49.7942	0.188711	0.651899	0.999466
ENSMUSG00000106878.1	Gm17808	34.5051	0.188629	0.56086	0.999466
ENSMUSG00000029840.8	Mtpn	2716.69	0.188615	0.505232	0.999466
ENSMUSG00000028478.18	Clta	537.289	0.188552	0.58134	0.999466
ENSMUSG00000044149.6	Nkrf	41.8894	0.188473	0.568994	0.999466
ENSMUSG00000086564.9	Cd101	65.7089	0.188353	0.651524	0.999466
ENSMUSG00000020190.13	Mknk2	607.819	0.18834	0.390588	0.999466
ENSMUSG00000097145.5	9230114K14Rik	89.8511	0.188329	0.606955	0.999466
ENSMUSG00000023892.7	Zfp51	307.849	0.188282	0.357706	0.999466
ENSMUSG00000019814.4	Ltv1	552.673	0.188281	0.247032	0.999466
ENSMUSG00000029417.9	Cxcl9	320.173	0.188223	0.651616	0.999466
ENSMUSG00000061306.15	Slc38a10	2595.55	0.188216	0.515681	0.999466
ENSMUSG00000029082.17	Bst1	307.339	0.188215	0.657179	0.999466
ENSMUSG00000028362.2	Tnfsf8	116.254	0.18818	0.657407	0.999466
ENSMUSG00000024810.16	Il33	4045.88	0.188174	0.557134	0.999466
ENSMUSG00000000278.10	Scpep1	2816.54	0.188155	0.505264	0.999466
ENSMUSG00000004814.10	Ccl24	82.6934	0.188151	0.649258	0.999466
ENSMUSG00000022485.3	Hoxc5	153.628	0.188125	0.645393	0.999466
ENSMUSG00000029397.15	Rchy1	615.827	0.187856	0.506387	0.999466
ENSMUSG00000053070.4	9230110C19Rik	98.93	0.18785	0.621886	0.999466
ENSMUSG00000032489.17	Kif9	68.9359	0.187808	0.540459	0.999466
ENSMUSG00000061119.6	Prcp	1043.37	0.187737	0.454781	0.999466
ENSMUSG00000101612.2	Gm7933	25.3623	0.187726	0.579566	0.999466
ENSMUSG00000021214.13	Akr1c18	870.185	0.187679	0.655114	0.999466
ENSMUSG00000039531.7	Zufsp	360.223	0.187575	0.497377	0.999466
ENSMUSG00000021514.17	Zfp369	73.2734	0.187532	0.449691	0.999466
ENSMUSG00000098234.7	Snhg6	435.464	0.187531	0.369419	0.999466
ENSMUSG00000027775.9	Mfsd1	417.282	0.187513	0.522048	0.999466
ENSMUSG00000068587.9	Mgam	67.7058	0.187428	0.592901	0.999466
ENSMUSG00000020437.12	Myo1g	641.107	0.187423	0.658811	0.999466
ENSMUSG00000087143.9	A830082K12Rik	94.3709	0.18732	0.651877	0.999466
ENSMUSG00000009406.13	Elk1	146.118	0.18727	0.375138	0.999466
ENSMUSG00000030579.9	Tyrobp	818.47	0.187116	0.492392	0.999466
ENSMUSG00000026833.18	Olfm1	261.582	0.187087	0.571545	0.999466
ENSMUSG00000102543.5	Pcdhgc5	189.986	0.187078	0.643517	0.999466
ENSMUSG00000022020.14	Naa16	273.931	0.18682	0.302956	0.999466
ENSMUSG00000021186.8	Fbln5	1839.39	0.186792	0.634693	0.999466
ENSMUSG00000063171.4	Rps4l	759.753	0.186783	0.585094	0.999466
ENSMUSG00000020272.8	Stk10	336.594	0.186719	0.649069	0.999466
ENSMUSG00000091655.3	Gm8741	47.3176	0.186455	0.561828	0.999466
ENSMUSG00000024678.6	Ms4a4d	2222.38	0.186452	0.575303	0.999466
ENSMUSG00000028480.14	Glipr2	2733.35	0.186393	0.559089	0.999466
ENSMUSG00000106609.1	Gm43181	40.8326	0.186336	0.660674	0.999466
ENSMUSG00000059058.7	Tma7-ps	67.1754	0.1863	0.439802	0.999466
ENSMUSG00000037933.15	Bicd2	423.342	0.18622	0.421887	0.999466
ENSMUSG00000060467.3	Gm10080	66.0388	0.186215	0.460176	0.999466
ENSMUSG00000024527.9	Afg3l2	413.001	0.186176	0.5436	0.999466
ENSMUSG00000053441.4	Adamts19	25.213	0.186134	0.661188	0.999466
ENSMUSG00000001348.14	Acp5	1181.77	0.186062	0.614198	0.999466
ENSMUSG00000031380.10	Vegfd	1997.35	0.185927	0.599727	0.999466
ENSMUSG00000021494.8	Ddx41	900.225	0.185858	0.321997	0.999466
ENSMUSG00000031885.13	Cbfb	598.549	0.185775	0.447521	0.999466
ENSMUSG00000020256.14	Aldh1l2	368.974	0.185715	0.632371	0.999466
ENSMUSG00000078794.4	Dact3	112.722	0.185652	0.632046	0.999466
ENSMUSG00000042751.14	Nmnat2	86.5117	0.185485	0.636202	0.999466
ENSMUSG00000024800.7	Rpp30	488.237	0.185292	0.281387	0.999466
ENSMUSG00000049409.9	Prokr1	228.846	0.185271	0.662949	0.999466
ENSMUSG00000024963.11	Dnajc4	530.585	0.185264	0.373867	0.999466
ENSMUSG00000022372.14	Sla	336.235	0.185089	0.662936	0.999466
ENSMUSG00000017057.9	Il13ra1	1640.31	0.185037	0.568199	0.999466
ENSMUSG00000023348.11	Trip6	636.725	0.184973	0.574427	0.999466
ENSMUSG00000035279.7	Ssc5d	677.006	0.184942	0.650787	0.999466
ENSMUSG00000021585.8	Cast	1776.02	0.184856	0.544752	0.999466
ENSMUSG00000031250.8	Tnmd	174.006	0.184732	0.663932	0.999466
ENSMUSG00000045414.7	1190002N15Rik	166.097	0.184668	0.396805	0.999466
ENSMUSG00000060166.5	Zdhhc8	185.288	0.184563	0.579994	0.999466
ENSMUSG00000029334.14	Prkg2	1089.55	0.184483	0.619674	0.999466
ENSMUSG00000049037.8	Clec4a1	447.468	0.18438	0.664511	0.999466
ENSMUSG00000095403.7	Gm21092	58.8793	0.184379	0.560469	0.999466
ENSMUSG00000031431.13	Tsc22d3	2014.66	0.184233	0.464346	0.999466
ENSMUSG00000041203.8	2310036O22Rik	131.582	0.184208	0.539765	0.999466
ENSMUSG00000010830.7	Kdelr3	1808.47	0.184188	0.557881	0.999466
ENSMUSG00000090523.2	Gypc	1353.51	0.184016	0.651186	0.999466
ENSMUSG00000030465.18	Psd3	346.475	0.184009	0.552294	0.999466
ENSMUSG00000022656.15	Nectin3	277.004	0.183781	0.555634	0.999466
ENSMUSG00000005973.6	Rcn1	770.695	0.183774	0.634373	0.999466
ENSMUSG00000016194.14	Hsd11b1	1610.71	0.183695	0.611199	0.999466
ENSMUSG00000032328.12	Tmem30a	825.802	0.183665	0.465387	0.999466
ENSMUSG00000028926.15	Cdk14	680.755	0.18364	0.630466	0.999466
ENSMUSG00000057280.15	Musk	67.5236	0.183588	0.648997	0.999466
ENSMUSG00000042133.16	Ppig	959.518	0.183456	0.309678	0.999466
ENSMUSG00000027900.15	Dram2	1284.66	0.183236	0.352272	0.999466
ENSMUSG00000020171.7	Yeats4	74.8454	0.183192	0.615411	0.999466
ENSMUSG00000025190.13	Got1	1419.04	0.18309	0.582838	0.999466
ENSMUSG00000017421.18	Zfp207	3068.13	0.183089	0.172405	0.999466
ENSMUSG00000025810.8	Nrp1	4166.26	0.183075	0.589226	0.999466
ENSMUSG00000050088.9	1600012H06Rik	804.749	0.183035	0.528517	0.999466
ENSMUSG00000053684.8	BC048403	78.3636	0.182971	0.469948	0.999466
ENSMUSG00000034566.10	Atp5h	260.183	0.182936	0.284775	0.999466
ENSMUSG00000082791.3	Gm4875	139.5	0.182887	0.330722	0.999466
ENSMUSG00000020605.8	Hs1bp3	522.283	0.182708	0.338376	0.999466
ENSMUSG00000027678.17	Ncoa3	1549.25	0.182693	0.447381	0.999466
ENSMUSG00000025854.15	Fam20c	381.184	0.18261	0.505902	0.999466
ENSMUSG00000026489.13	Coq8a	226.876	0.1826	0.627178	0.999466
ENSMUSG00000083179.3	Gm12693	68.518	0.182522	0.443746	0.999466
ENSMUSG00000023089.12	Ndufa5	501.271	0.182474	0.224362	0.999466
ENSMUSG00000045679.13	Pqlc3	972.484	0.182472	0.613316	0.999466
ENSMUSG00000010067.13	Rassf1	826.478	0.182427	0.486449	0.999466
ENSMUSG00000020544.14	Cox11	38.8119	0.182346	0.591088	0.999466
ENSMUSG00000071669.14	Snx29	202.336	0.182328	0.538514	0.999466
ENSMUSG00000026339.18	Ccdc93	437.966	0.182183	0.43995	0.999466
ENSMUSG00000078490.9	Cfap74	90.0041	0.182166	0.566869	0.999466
ENSMUSG00000036676.14	Tmtc3	330.6	0.182008	0.433283	0.999466
ENSMUSG00000023411.11	Nfatc4	259.649	0.181915	0.582025	0.999466
ENSMUSG00000039115.13	Itga9	329.806	0.181907	0.610732	0.999466
ENSMUSG00000029084.5	Cd38	1625.14	0.181896	0.605053	0.999466
ENSMUSG00000020376.16	Rnf130	190.369	0.181883	0.446945	0.999466
ENSMUSG00000104882.1	Gm43096	52.4966	0.181858	0.526142	0.999466
ENSMUSG00000002428.12	Hltf	460.908	0.181816	0.389452	0.999466
ENSMUSG00000030084.11	Plxna1	836.122	0.181696	0.584271	0.999466
ENSMUSG00000036103.8	Colec12	2779.15	0.18165	0.627817	0.999466
[truncated: 12,076 more rows]

## Sheet: Table S5
Table S5	Differential gene expression analysis (RNA sequencing) in mouse colon fibroblasts cultured in the absence (control) or in the presence of Wnt3a-conditioned medium (3 days).
Ensembl gene ID	gene name	mean normalized counts	fold change (log2)	p-value	adj. p-value
ENSMUSG00000000142.15	Axin2	684.461	3.31091	0	0
ENSMUSG00000029335.5	Bmp3	963.223	2.91096	0	0
ENSMUSG00000060548.12	Tnfrsf19	372.012	2.8717	1.48212e-204	2.72299e-201
ENSMUSG00000020140.15	Lgr5	282.346	2.74923	9.47216e-156	1.20479e-152
ENSMUSG00000027358.6	Bmp2	178.892	2.69259	1.02183e-125	9.38661e-123
ENSMUSG00000049001.5	Ndnf	265.276	2.50693	1.06206e-139	1.17075e-136
ENSMUSG00000028031.6	Dkk2	395.621	2.37356	6.60164e-166	9.09651e-163
ENSMUSG00000025780.7	Itih5	470.257	2.24063	1.27104e-178	2.10167e-175
ENSMUSG00000031661.11	Nkd1	399.061	2.17413	3.08581e-148	3.64456e-145
ENSMUSG00000054423.13	Cadps	476.269	2.16983	1.201e-172	1.80532e-169
ENSMUSG00000074766.10	Ism1	370.682	2.14615	4.19295e-136	4.33315e-133
ENSMUSG00000035258.14	Abi3bp	668.447	2.09913	2.02268e-218	4.18063e-215
ENSMUSG00000060044.7	Tmem26	334.292	2.07192	6.35252e-120	5.25195e-117
ENSMUSG00000071847.12	Apcdd1	986.733	2.03237	3.64441e-268	1.00434e-264
ENSMUSG00000002847.6	Pla1a	208.861	1.92062	1.51634e-80	7.59777e-78
ENSMUSG00000022425.15	Enpp2	1323.44	1.90252	5.05309e-308	2.08882e-304
ENSMUSG00000038156.15	Spon1	1296.63	1.86025	1.09071e-283	3.60697e-280
ENSMUSG00000037035.5	Inhbb	431.631	1.69353	4.61985e-106	3.05557e-103
ENSMUSG00000014813.8	Stc1	276.196	1.62589	2.23673e-71	9.99576e-69
ENSMUSG00000053117.10	E330013P04Rik	147.518	1.60544	3.68185e-49	9.36606e-47
ENSMUSG00000022231.9	Sema5a	1346.65	1.56091	4.02947e-228	9.51818e-225
ENSMUSG00000000794.9	Kcnn3	142.74	1.55971	2.86179e-46	6.75995e-44
ENSMUSG00000028020.16	Glrb	69.8045	1.5256	2.53058e-35	4.22658e-33
ENSMUSG00000051111.15	Sv2c	100.61	1.51263	1.92788e-37	3.39122e-35
ENSMUSG00000021319.6	Sfrp4	108.001	1.50395	1.34391e-38	2.46907e-36
ENSMUSG00000019932.7	Kera	200.727	1.48161	2.44715e-50	6.63339e-48
ENSMUSG00000027985.14	Lef1	71.899	1.45963	7.28574e-33	1.12589e-30
ENSMUSG00000059325.14	Hopx	100.372	1.44683	3.01093e-35	4.88095e-33
ENSMUSG00000091345.8	Col6a5	671.115	1.4435	1.61091e-58	5.22282e-56
ENSMUSG00000038151.12	Prdm1	149.75	1.4144	3.48752e-39	6.55296e-37
ENSMUSG00000025938.16	Slco5a1	63.852	1.41407	3.3683e-30	4.56514e-28
ENSMUSG00000035105.5	Egln3	180.296	1.41354	4.79799e-43	1.01711e-40
ENSMUSG00000021373.15	Cap2	144.616	1.3975	4.14905e-38	7.53896e-36
ENSMUSG00000037996.17	Slc24a2	96.7744	1.38316	1.13437e-31	1.63103e-29
ENSMUSG00000021575.15	Ahrr	221.258	1.33645	1.29591e-28	1.63571e-26
ENSMUSG00000005089.15	Slc1a2	59.5589	1.31164	3.03003e-26	3.47927e-24
ENSMUSG00000041482.16	Piezo2	838.916	1.30276	1.00895e-119	7.94425e-117
ENSMUSG00000040016.16	Ptger3	52.9244	1.29666	1.86285e-25	2.03988e-23
ENSMUSG00000042988.10	Notum	56.9402	1.22866	4.65979e-23	4.35309e-21
ENSMUSG00000019359.14	Gdpd2	461.229	1.19346	5.1561e-59	1.73992e-56
ENSMUSG00000001741.11	Il16	458.319	1.18597	3.92248e-59	1.35121e-56
ENSMUSG00000039323.18	Igfbp2	303.752	1.18027	4.03671e-45	9.01985e-43
ENSMUSG00000062991.6	Nrg1	300.576	1.17298	7.85137e-44	1.68601e-41
ENSMUSG00000033453.7	Adamts15	940.177	1.17017	1.64748e-33	2.59439e-31
ENSMUSG00000047330.8	Kcne4	148.733	1.17017	4.26947e-28	5.26833e-26
ENSMUSG00000036019.8	Tmtc2	415.717	1.14802	1.05625e-54	3.17547e-52
ENSMUSG00000090210.7	Itga10	148.485	1.12817	1.72475e-25	1.90125e-23
ENSMUSG00000052353.13	Cemip	1133.76	1.12226	1.32612e-103	8.43364e-101
ENSMUSG00000023915.4	Tnfrsf21	589.5	1.11244	5.0356e-67	2.08159e-64
ENSMUSG00000039683.16	Sdk1	1244.24	1.10339	2.67531e-116	2.01074e-113
ENSMUSG00000041731.13	Pgm5	115.2	1.08108	5.76058e-22	5.03974e-20
ENSMUSG00000051022.7	Hs3st1	78.2329	1.06546	6.34276e-19	4.54015e-17
ENSMUSG00000032492.14	Pth1r	148.628	1.05365	8.95227e-24	8.75892e-22
ENSMUSG00000027996.13	Sfrp2	721.806	1.04084	1.43343e-62	5.51205e-60
ENSMUSG00000071984.10	Fndc1	1177.09	1.03895	1.49917e-99	8.26292e-97
ENSMUSG00000074743.4	Thbd	187.314	1.0283	7.5588e-25	7.91043e-23
ENSMUSG00000105695.1	Gm43327	121.545	1.02267	5.3927e-20	4.14736e-18
ENSMUSG00000079355.3	Ackr4	156.669	1.01151	2.5324e-21	2.11481e-19
ENSMUSG00000053279.6	Aldh1a1	179.298	1.0066	7.88062e-23	7.32057e-21
ENSMUSG00000030249.15	Abcc9	270.609	1.00388	6.40245e-30	8.53746e-28
ENSMUSG00000032702.16	Kank1	703.426	0.994378	6.66334e-63	2.62329e-60
ENSMUSG00000075012.4	Fjx1	234.588	0.98889	2.21139e-27	2.6306e-25
ENSMUSG00000060487.5	Samd5	273.218	0.974909	4.02499e-28	5.004e-26
ENSMUSG00000039155.15	Cdh26	65.3523	0.972864	1.76119e-15	1.00766e-13
ENSMUSG00000022206.6	Npr3	618.764	0.966485	2.23283e-53	6.59282e-51
ENSMUSG00000039239.14	Tgfb2	420.366	0.962879	2.53636e-40	4.93396e-38
ENSMUSG00000020866.17	Cacna1g	1758.54	0.962858	2.02922e-107	1.39805e-104
ENSMUSG00000056476.13	Med12l	76.6492	0.958087	2.54911e-15	1.42397e-13
ENSMUSG00000019990.14	Pde7b	522.432	0.955347	1.22312e-44	2.6611e-42
ENSMUSG00000040998.18	Npnt	127.158	0.951799	8.29758e-18	5.53228e-16
ENSMUSG00000022454.16	Nell2	70.2711	0.95136	6.05863e-15	3.28457e-13
ENSMUSG00000019647.16	Sema6a	320.827	0.948524	2.02203e-31	2.88226e-29
ENSMUSG00000030306.14	Tmtc1	56.4375	0.944693	2.52816e-14	1.27061e-12
ENSMUSG00000087143.9	A830082K12Rik	256.899	0.932301	3.63819e-26	4.14879e-24
ENSMUSG00000024924.14	Vldlr	912.427	0.932095	1.78318e-66	7.19142e-64
ENSMUSG00000023927.15	Satb1	196.782	0.92977	1.63365e-21	1.38525e-19
ENSMUSG00000037762.6	Slc16a9	141.645	0.918692	2.89464e-17	1.87732e-15
ENSMUSG00000097558.1	Gm26902	95.8414	0.907454	4.28095e-15	2.35952e-13
ENSMUSG00000047420.8	Fam180a	101.801	0.902601	3.5432e-15	1.966e-13
ENSMUSG00000038354.13	Ankrd35	140.419	0.875913	3.23529e-16	1.9243e-14
ENSMUSG00000033721.16	Vav3	836.837	0.864325	4.72131e-55	1.44568e-52
ENSMUSG00000046561.9	Arsj	713.124	0.862873	7.65704e-49	1.91832e-46
ENSMUSG00000022330.4	Osr2	595.205	0.859609	5.66988e-41	1.14331e-38
ENSMUSG00000036158.12	Prickle1	905.535	0.85953	9.50884e-60	3.34529e-57
ENSMUSG00000048988.8	Elfn1	121.421	0.855148	6.71876e-15	3.60697e-13
ENSMUSG00000026463.17	Atp2b4	323.237	0.854604	1.53454e-26	1.78688e-24
ENSMUSG00000000359.3	Rem1	63.458	0.850422	3.57938e-12	1.52147e-10
ENSMUSG00000069171.13	Nr2f1	503.256	0.848517	3.1711e-36	5.35042e-34
ENSMUSG00000027834.15	Serpini1	170.102	0.842788	1.67311e-16	1.01709e-14
ENSMUSG00000035305.5	Ror1	366.772	0.839787	1.53352e-26	1.78688e-24
ENSMUSG00000063142.13	Kcnma1	640.341	0.838429	4.90065e-40	9.42236e-38
ENSMUSG00000032289.15	Thsd4	63.4787	0.838171	7.55229e-12	3.06071e-10
ENSMUSG00000040260.7	Daam2	323.971	0.836167	3.23897e-25	3.50041e-23
ENSMUSG00000051279.2	Gdf6	127.967	0.833949	1.43332e-14	7.42946e-13
ENSMUSG00000019775.17	Rgs17	82.6762	0.833565	2.24024e-12	9.67162e-11
ENSMUSG00000040430.18	Pitpnc1	546.881	0.833167	1.16901e-37	2.10103e-35
ENSMUSG00000022464.13	Slc38a4	651.225	0.833069	7.8113e-43	1.63493e-40
ENSMUSG00000052974.8	Cyp2f2	126.303	0.831374	2.37073e-14	1.19878e-12
ENSMUSG00000027188.8	Pamr1	1169.66	0.829621	1.31052e-61	4.92487e-59
ENSMUSG00000006958.13	Chrd	187.194	0.828365	2.25854e-17	1.47608e-15
ENSMUSG00000036596.6	Cpz	578.316	0.826236	4.433e-37	7.71575e-35
ENSMUSG00000036334.12	Igsf10	2487.64	0.817172	7.78271e-101	4.59597e-98
ENSMUSG00000031558.15	Slit2	2165.57	0.816842	2.16383e-99	1.15416e-96
ENSMUSG00000024376.6	Epb41l4a	131.516	0.808906	6.33199e-14	3.12536e-12
ENSMUSG00000020007.3	Il20ra	142.348	0.806549	2.30341e-14	1.16831e-12
ENSMUSG00000073650.8	Catip	118.466	0.805925	7.81748e-13	3.52213e-11
ENSMUSG00000084910.1	C630043F03Rik	87.9832	0.804602	6.23741e-12	2.54028e-10
ENSMUSG00000022510.14	Trp63	63.6643	0.791076	1.3624e-10	4.73264e-09
ENSMUSG00000051224.13	Tceanc	471.599	0.788085	1.23657e-14	6.47048e-13
ENSMUSG00000032548.14	Slco2a1	290.205	0.785128	1.87848e-20	1.51515e-18
ENSMUSG00000029576.17	Radil	97.7223	0.784269	1.05076e-11	4.12692e-10
ENSMUSG00000085282.8	Gm15663	94.3589	0.78381	1.15403e-11	4.47931e-10
ENSMUSG00000040037.13	Negr1	151.395	0.781395	8.58193e-14	4.17359e-12
ENSMUSG00000008305.18	Tle1	900.979	0.781343	2.59712e-49	6.7099e-47
ENSMUSG00000030247.9	Kcnj8	315.771	0.781002	2.11484e-12	9.17818e-11
ENSMUSG00000028019.9	Pdgfc	606.766	0.774646	3.00999e-35	4.88095e-33
ENSMUSG00000037962.7	Rflna	134.162	0.763811	1.17227e-12	5.22466e-11
ENSMUSG00000050069.3	Grem2	640.838	0.763346	9.61774e-33	1.43384e-30
ENSMUSG00000071567.6	NA	103.704	0.754961	3.61388e-11	1.32496e-09
ENSMUSG00000019256.17	Ahr	1082.28	0.754322	1.43597e-51	4.02436e-49
ENSMUSG00000036856.4	Wnt4	536.15	0.753489	3.12647e-31	4.38104e-29
ENSMUSG00000020303.2	Stc2	267.403	0.750818	4.7874e-18	3.2576e-16
ENSMUSG00000042942.15	Greb1l	124.274	0.74234	1.22226e-11	4.73302e-10
ENSMUSG00000053552.14	Ebf4	236.162	0.739385	4.01354e-16	2.37014e-14
ENSMUSG00000058420.7	Syt17	55.9962	0.73713	2.49556e-09	7.64149e-08
ENSMUSG00000027253.15	Lrp4	406.539	0.734344	2.82157e-23	2.6968e-21
ENSMUSG00000097928.1	Gm26578	74.0709	0.732231	1.20816e-09	3.80513e-08
ENSMUSG00000021567.14	Nkd2	1669.57	0.730899	2.25021e-67	9.54033e-65
ENSMUSG00000055980.2	Irs1	545.938	0.72951	2.73061e-29	3.58338e-27
ENSMUSG00000032332.17	Col12a1	6163.79	0.728591	1.73416e-101	1.06201e-98
ENSMUSG00000022883.10	Robo1	1095.59	0.725714	1.32949e-48	3.28107e-46
ENSMUSG00000038112.15	AW551984	412.774	0.718853	4.03881e-22	3.60982e-20
ENSMUSG00000073565.4	Prr16	395.755	0.711907	2.82284e-21	2.33378e-19
ENSMUSG00000042686.5	Jph1	61.1416	0.709739	8.14245e-09	2.34149e-07
ENSMUSG00000027412.12	Lpin3	301.516	0.699899	5.78102e-17	3.63457e-15
ENSMUSG00000050666.13	Vstm4	174.543	0.699611	1.45381e-12	6.3933e-11
ENSMUSG00000021994.14	Wnt5a	1392.91	0.697162	3.43297e-56	1.07102e-53
ENSMUSG00000024598.8	Fbn2	648.638	0.69333	6.17598e-31	8.5815e-29
ENSMUSG00000058152.7	Chsy3	130.42	0.691113	1.72331e-10	5.8874e-09
ENSMUSG00000030849.17	Fgfr2	623.243	0.683107	7.82208e-29	9.94908e-27
ENSMUSG00000036298.10	Slc2a13	360.45	0.679149	1.97329e-17	1.29478e-15
ENSMUSG00000026768.10	Itga8	438.892	0.669529	1.80345e-19	1.34933e-17
ENSMUSG00000063415.12	Cyp26b1	541.652	0.661298	8.37925e-12	3.33857e-10
ENSMUSG00000021779.16	Thrb	261.778	0.656355	3.70227e-14	1.84388e-12
ENSMUSG00000029153.11	Ociad2	260.46	0.65236	5.9093e-13	2.72173e-11
ENSMUSG00000046491.10	C1qtnf2	157.503	0.646482	3.18198e-10	1.04809e-08
ENSMUSG00000021835.14	Bmp4	183.732	0.642194	5.19039e-11	1.86979e-09
ENSMUSG00000034156.16	Tspoap1	95.794	0.640859	4.00775e-08	1.0654e-06
ENSMUSG00000030222.13	Rerg	632.102	0.637491	3.92285e-26	4.44276e-24
ENSMUSG00000032482.9	Cspg5	81.4926	0.631597	1.02376e-07	2.60831e-06
ENSMUSG00000041046.7	Ramp3	55.4941	0.62837	3.71822e-07	8.64709e-06
ENSMUSG00000050896.12	Rtn4rl2	72.6644	0.626073	1.87369e-07	4.60468e-06
ENSMUSG00000040717.5	Il17rd	258.792	0.623765	7.07669e-13	3.21464e-11
ENSMUSG00000056031.13	9330154J02Rik	71.7686	0.623062	2.38098e-07	5.739e-06
ENSMUSG00000000402.2	Egfl6	566.059	0.618313	2.04604e-22	1.85886e-20
ENSMUSG00000027709.9	Mccc1	636.5	0.61133	2.01911e-23	1.95239e-21
ENSMUSG00000059921.15	Unc5c	1719.07	0.607216	2.58045e-47	6.27468e-45
ENSMUSG00000030643.13	Rab30	193.986	0.599987	3.00904e-10	9.9509e-09
ENSMUSG00000050953.9	Gja1	822.777	0.596016	6.74784e-28	8.20408e-26
ENSMUSG00000019986.16	Ahi1	449.752	0.591704	5.71862e-17	3.60906e-15
ENSMUSG00000017740.16	Slc12a5	122.78	0.591604	6.04865e-08	1.57751e-06
ENSMUSG00000052125.16	F730043M19Rik	416.433	0.591169	3.78081e-16	2.24071e-14
ENSMUSG00000035799.5	Twist1	269.223	0.57616	1.61765e-11	6.12079e-10
ENSMUSG00000027318.17	Adam33	174.161	0.571131	1.63305e-08	4.53062e-07
ENSMUSG00000092021.8	Gbp11	176.216	0.570756	6.46417e-09	1.87189e-07
ENSMUSG00000023206.16	Il15ra	182.296	0.570407	6.23878e-09	1.81298e-07
ENSMUSG00000097876.1	Gm16892	53.0886	0.570178	4.33843e-06	8.90024e-05
ENSMUSG00000031642.8	Sh3rf1	515.023	0.56956	4.76281e-18	3.25426e-16
ENSMUSG00000028289.12	Epha7	379.05	0.569185	1.16978e-07	2.94852e-06
ENSMUSG00000033060.15	Lmo7	582.398	0.566767	1.46946e-17	9.68031e-16
ENSMUSG00000035270.15	Impg2	59.7461	0.566735	3.90937e-06	8.07009e-05
ENSMUSG00000068205.14	Macrod2	149.153	0.564232	8.4809e-08	2.17751e-06
ENSMUSG00000026303.6	Mlph	55.5621	0.560946	5.42101e-06	0.00010918
ENSMUSG00000001334.9	Fndc5	141.165	0.560895	1.50492e-07	3.74211e-06
ENSMUSG00000017417.14	Plxdc1	742.851	0.555585	1.24154e-21	1.06367e-19
ENSMUSG00000032666.16	1700025G04Rik	1187.33	0.555544	5.49488e-33	8.57149e-31
ENSMUSG00000029377.5	Ereg	690.779	0.55097	1.90417e-20	1.52104e-18
ENSMUSG00000044349.15	Snhg11	233.197	0.550294	1.46673e-09	4.59325e-08
ENSMUSG00000032232.14	Cgnl1	1800.08	0.5495	1.22331e-40	2.43705e-38
ENSMUSG00000021130.7	Galnt16	145.896	0.547718	1.41313e-07	3.53623e-06
ENSMUSG00000042284.9	Itga1	852.209	0.545685	9.93527e-25	1.03321e-22
ENSMUSG00000020467.15	Efemp1	662.405	0.544465	6.6373e-20	5.08092e-18
ENSMUSG00000022754.5	Tmem45a	520.953	0.540759	1.33471e-16	8.17385e-15
ENSMUSG00000035936.6	Aldh5a1	103.941	0.539704	2.46972e-06	5.17577e-05
ENSMUSG00000033327.16	Tnxb	578.335	0.539696	7.89492e-09	2.27426e-07
ENSMUSG00000053475.5	Tnfaip6	121.579	0.537233	8.32217e-07	1.86207e-05
[truncated: 12,379 more rows]

## Sheet: Table S6
Table S6	Summary of GSEA results for signatures related to Wnt signaling, cell cycle, inflammation, ECM and invasiveness.
[truncated: 29 more rows]

[truncated: 2 more sheets: Table S7, Table S8]
